# Supplementary material
Source: publisher site journal article supplement (https://www.dovepress.com/article/388323)
Supplement: Supplementary file 1 [file get_supplementary_file.php]

# 1.Supplementary Figures and Tables

**Supplementary Tables**

**Table S1** Age distribution of incidence (per 100,000) for Colorectal cancer in different countries in 2019.

**Table S2** Three regions with the largest and lowest number of incidence, death, or DALY.

**Table S3** Three countries with the largest and lowest number of incidence, death, or DALY.

**Table S4** The incident cases and age-standardized incidence rate of Colorectal cancer in 1990 and 2019, and its temporal trends from 1990 to 2019.

**Table S5** Age distribution of death rate (per 100,000) for Colorectal cancer in different countries in 2019.

**Table S6** The death cases and age-standardized death rate of Colorectal cancer in 1990 and 2019, and its temporal trends from 1990 to 2019.

**Table S7** Age distribution of DALYs rate (per 100,000) for Colorectal cancer in different countries in 2019.

**Table S8** The DALY and age-standardized DALY rate of Colorectal cancer in 1990 and 2019, and its temporal trends from 1990 to 2019.

**Table S9** The attributable proportions of risk factors for colorectal cancer deaths in different countries in 2019.

**Table S10** The attributable proportions of risk factors for colorectal cancer DALYs in different countries in 2019.

**Table S11** The attributable proportions of risk factors for colorectal cancer DALYs in different regions in 2019**.**

**Table S12** The attributable proportions of risk factors for colorectal cancer deaths in different regions in 2019.

**Supplementary Figures**

**Figure S1** Colorectal cancer Age-standardized incidence rates for both genders in 204 countries and territories from 1990 to 2019

**Figure S2** The EAPC of colorectal cancer age -standardized DALY rate in global, SDI regions, and 21 GBD regions by sex

**Figure S3** Colorectal cancer age-standardized incidence rate in countries in low SDI region by sex

**Figure S4** Colorectal cancer age-standardized death rate in countries in low SDI region by sex

**Figure S5** Colorectal cancer age-standardized DLAY rate in countries in low SDI region by sex

**Figure S6** Colorectal cancer Age-standardized death rates for both genders in 204 countries and territories from 1990 to 2019

**Figure S7** Global number of DLAYs and DALY rate of colorectal cancer per 100 000 person-years by age and sex, 2019

**Figure S8** The age -standardized DALY rate in global, SDI regions, and 21 GBD regions by sex, 2019

**Figure S9** The percentage change in age -standardized DALY rate of colorectal cancer for global and SDI regions by age

**Figure S10** Age-standardized DALY rates per 100 000 person-years for colorectal cancer for 21 GBD regions by SDI, 1990–2019

**Figure S11** Colorectal cancer age-standardized DALY rates for both genders in 204 countries and territories from 1990 to 2019

**Figure S12** Trends in colorectal cancer age -standardized incidence and death rates by sex globally from 1990 to 2044. **A and C**: The age -standardized incidence and death rates trends in male. **B and D:** The age -standardized incidence and death rates trends in female.

**Figure S13** Trends in colorectal cancer incidence and death rates by sex in global: observed (solid lines) and predicted rates (dashed lines)

**Figure S14** The attributable proportions of risk factors for colorectal cancer deaths by age in 2019.

**Figure S15** The attributable proportions of risk factors for colorectal cancer deaths by age in global, SDI regions, and 21 GBD regions in 2019.

**Figure S16** The attributable proportions of risk factors for colorectal cancer DALYs in 2019.

**Figure S17** The attributable proportions of risk factors for colorectal cancer DALYs by age in global, SDI regions, and 21 GBD regions in 2019.

**Figure S18** The change of attributable proportions of risk factors for colorectal cancer deaths in female from 1990 to 2019.

**Figure S19** The change of attributable proportions of risk factors for colorectal cancer DALYs in female from 2017 to 2019.

**Figure S20** The change of attributable proportions of risk factors for colorectal cancer DALYs in female from 1990 to 2019.

**Figure S21** The change of attributable proportions of risk factors for colorectal cancer deaths in female from 2017 to 2019.

- 1. **Supplementary Tables**

**Table S1** Age distribution of incidence (per 100,000) for Colorectal cancer in different countries in 2019.

| Country | 5-9 | 10-14 | 15-19 | 20-24 | 25-29 | 30-34 | 35-39 | 40-44 | 45-49 | 50-54 | 55-59 | 60-64 | 65-69 | 70-74 | 75-79 | 80-84 | 85-89 | 90-94 | ≥95 |
| --- | --- | --- | --- | --- | --- | --- | --- | --- | --- | --- | --- | --- | --- | --- | --- | --- | --- | --- | --- |
| Afghanistan | 0.038977469 | 0.044102199 | 0.165313416 | 0.387334358 | 0.797443739 | 1.782802892 | 3.222280628 | 5.475654318 | 9.775125799 | 15.56126704 | 22.46341871 | 30.1637416 | 37.90748511 | 47.30158181 | 55.76890719 | 64.77205657 | 73.87366845 | 67.80038599 | 63.00311431 |
| Albania | 0.415128579 | 0.300055237 | 0.737300712 | 1.950281723 | 3.205554893 | 4.398932984 | 6.273826453 | 8.15837104 | 11.86671008 | 19.95309524 | 26.99213408 | 45.61358722 | 63.8481976 | 94.93000742 | 121.2317659 | 140.9436039 | 140.0124178 | 128.5691234 | 136.7703333 |
| Algeria | 0.063177373 | 0.07440095 | 0.186974052 | 0.401966225 | 0.733632806 | 1.609115808 | 2.996627139 | 5.103717624 | 8.426276136 | 13.73178859 | 21.59438989 | 33.73550456 | 44.81891106 | 54.90560483 | 76.13316689 | 99.65951054 | 167.1764778 | 153.9689424 | 133.1532532 |
| American Samoa | 0.093876357 | 0.101249633 | 0.967503753 | 1.395749808 | 2.842495145 | 4.210368649 | 6.205965348 | 9.471906669 | 18.91246096 | 31.0210254 | 47.99518753 | 66.75175207 | 89.45954408 | 112.0808083 | 142.7892571 | 182.82588 | 266.572742 | 179.0489222 | 378.5620624 |
| Andorra | 0.093233222 | 0.10595692 | 0.326259707 | 1.091892556 | 2.583706897 | 5.552812871 | 10.84248406 | 20.07776199 | 36.01271601 | 68.79123936 | 113.6015947 | 177.8999421 | 263.8072104 | 374.0956884 | 495.3807975 | 596.9393626 | 657.3732328 | 577.4398136 | 692.5259963 |
| Angola | 0.053649246 | 0.055541931 | 0.203022896 | 0.410799437 | 0.711918685 | 1.437511294 | 2.459278697 | 4.204951068 | 8.061874926 | 14.48344426 | 22.98653131 | 34.2220154 | 46.06939119 | 59.69163557 | 74.4421867 | 91.27327208 | 106.6509501 | 106.1464566 | 107.7414858 |
| Antigua and Barbuda | 0.095129775 | 0.081880745 | 0.460948712 | 0.892447808 | 1.43805408 | 2.335260985 | 4.57676215 | 7.3262034 | 13.5064064 | 27.88349783 | 51.19528956 | 83.19531119 | 112.3347152 | 160.8498863 | 219.2532736 | 305.3586438 | 320.1170449 | 320.4697556 | 347.5473024 |
| Argentina | 0.089775328 | 0.135943159 | 0.727119205 | 1.431504117 | 2.381477759 | 4.44234367 | 8.169688558 | 13.05027952 | 24.1696944 | 44.57628207 | 74.26064973 | 117.7921526 | 162.8356406 | 218.2951779 | 275.1587491 | 331.8347889 | 386.0815441 | 357.8998323 | 366.0107445 |
| Armenia | 0.077672394 | 0.073381064 | 0.527040009 | 1.093510289 | 1.604100378 | 3.200415062 | 5.489595469 | 9.543390919 | 16.26077968 | 27.05978014 | 45.98875059 | 73.80197871 | 110.1881758 | 155.3751237 | 171.9177698 | 177.3837499 | 147.9090899 | 143.5065627 | 153.9008863 |
| Australia | 0.12440728 | 0.151822259 | 0.441948981 | 1.321407222 | 3.190871232 | 6.763272684 | 11.01860672 | 19.90353768 | 35.94881439 | 61.30436046 | 91.35401554 | 144.6550946 | 208.5036546 | 289.2854359 | 414.0535304 | 489.1995106 | 539.440763 | 466.3584984 | 544.3128172 |
| Austria | 0.055748792 | 0.061745033 | 0.201476934 | 0.577013869 | 1.052709687 | 2.666745929 | 5.212822831 | 11.04539217 | 21.65272569 | 39.41235378 | 67.98330935 | 109.294275 | 164.4678685 | 224.5228933 | 274.0852096 | 330.868393 | 359.8892571 | 348.8599453 | 437.6493611 |
| Azerbaijan | 0.114474077 | 0.118085502 | 0.99359841 | 1.755525473 | 2.247390609 | 3.630668978 | 6.183952722 | 9.946173283 | 15.88406021 | 26.34663006 | 40.67236676 | 57.14173855 | 78.54863579 | 89.33702167 | 104.339095 | 118.6141349 | 123.646713 | 129.0187033 | 117.1997981 |
| Bahamas | 0.097907059 | 0.103306987 | 0.719468984 | 1.527785274 | 3.0398842 | 6.23742846 | 10.49492156 | 15.34725369 | 22.81109139 | 41.20368449 | 61.19482747 | 88.05635215 | 131.0317434 | 166.3405442 | 210.9492856 | 244.5115055 | 256.2535259 | 254.1082833 | 234.9904269 |
| Bahrain | 0.082921781 | 0.090607767 | 0.344598375 | 1.096129465 | 1.265342037 | 2.580603146 | 3.594670613 | 6.12589059 | 10.67354637 | 19.19837892 | 29.31338835 | 53.17281948 | 80.09999717 | 104.1065313 | 133.8657154 | 178.1030109 | 227.3320534 | 238.670406 | 309.7726812 |
| Bangladesh | 0.061475856 | 0.071881967 | 0.131048552 | 0.225658444 | 0.368826779 | 0.71531573 | 1.198354753 | 2.091845025 | 4.519317799 | 8.539786016 | 11.99022388 | 17.74059204 | 25.02721914 | 33.10535966 | 41.60347112 | 59.86622813 | 66.40486396 | 62.3834852 | 64.01419534 |
| Barbados | 0.126375445 | 0.151508271 | 0.972833854 | 1.489770269 | 2.525298697 | 5.6307803 | 8.742163503 | 14.66674804 | 24.70727305 | 44.03219255 | 79.90245594 | 132.1412368 | 180.0551827 | 256.5100526 | 351.9658315 | 406.5856874 | 455.2680292 | 419.8788424 | 445.0093678 |
| Belarus | 0.06147247 | 0.082003716 | 0.528803087 | 1.028589191 | 1.863274568 | 3.616566033 | 7.472386642 | 12.91258706 | 23.92321503 | 48.16906646 | 81.49056399 | 128.8407213 | 188.5633963 | 240.8312169 | 266.0871055 | 269.7187487 | 208.8216423 | 181.5541266 | 202.1874798 |
| Belgium | 0.117103494 | 0.107755791 | 0.338946618 | 0.676933933 | 1.436042644 | 2.98335557 | 6.080394436 | 11.55964174 | 23.73738581 | 45.32371829 | 77.923947 | 126.1585155 | 184.7365716 | 262.5000665 | 337.2668296 | 408.1795642 | 482.4857681 | 491.7752443 | 643.758578 |
| Belize | 0.057081472 | 0.057398976 | 0.436043675 | 0.756557045 | 1.491049529 | 3.177120531 | 4.282164888 | 6.836400305 | 12.28906874 | 22.45659789 | 36.11103392 | 49.31663201 | 63.97657218 | 83.47772664 | 107.4502398 | 131.3558121 | 139.3451561 | 133.5534609 | 139.1575866 |
| Benin | 0.06640114 | 0.072296055 | 0.137898824 | 0.388417857 | 0.426380833 | 0.911594426 | 2.089056148 | 2.571228632 | 5.149188349 | 10.07826616 | 13.97870987 | 22.97596999 | 33.21327617 | 46.50796708 | 69.50269969 | 93.5890432 | 91.43827221 | 95.18940955 | 95.71112753 |
| Bermuda | 0.14107803 | 0.118259987 | 0.966361613 | 1.714710676 | 2.30524123 | 4.406685751 | 8.368055542 | 15.90121375 | 28.27042896 | 52.96647305 | 83.61675405 | 123.3155857 | 189.6799043 | 263.1514052 | 377.8082545 | 487.1677239 | 575.7130766 | 545.3944593 | 702.2465978 |
| Bhutan | 0.050902074 | 0.050288269 | 0.147900621 | 0.286658948 | 0.459926499 | 0.980898751 | 1.658895667 | 2.912768363 | 6.222446538 | 9.664784364 | 15.10751085 | 22.84660479 | 34.25730278 | 51.13661512 | 70.32265789 | 93.99813358 | 101.0069844 | 85.51193982 | 81.70111196 |
| Bolivia (Plurinational State of) | 0.069576627 | 0.08471455 | 0.389227799 | 0.624795923 | 1.113480048 | 1.884204554 | 3.371642736 | 5.766936806 | 10.88697766 | 19.81812372 | 32.32294412 | 51.52624146 | 74.46733122 | 113.2548319 | 150.0179253 | 181.1474812 | 210.1210556 | 179.1605265 | 165.67661 |
| Bosnia and Herzegovina | 0.164842742 | 0.235092162 | 0.861378601 | 1.829926014 | 2.551246563 | 4.933078527 | 8.158750338 | 15.57620541 | 25.27628854 | 46.27547786 | 81.39292996 | 118.1293375 | 159.1032043 | 246.2747777 | 296.9140061 | 309.7063135 | 279.4892204 | 218.2091881 | 227.607418 |
| Botswana | 0.119703911 | 0.121639268 | 0.340304092 | 0.657590821 | 1.291008438 | 2.596711092 | 4.967299257 | 8.598746769 | 15.43093172 | 26.77695329 | 41.47636671 | 57.44700947 | 82.10760624 | 107.6570604 | 147.5322811 | 192.3928132 | 217.3219634 | 199.3892859 | 184.5397423 |
| Brazil | 0.047206582 | 0.097451842 | 0.430039651 | 0.888858783 | 1.577561472 | 3.005908334 | 5.326662694 | 9.196134733 | 16.20718695 | 26.68819521 | 41.67681858 | 60.08131632 | 80.61744222 | 104.4239103 | 129.3583259 | 153.3456916 | 172.8519676 | 152.3360212 | 159.2459916 |
| Brunei Darussalam | 0.107354158 | 0.155734369 | 0.677116782 | 1.69270225 | 3.156828106 | 6.080869979 | 11.07277293 | 19.52213023 | 33.96513349 | 56.7606359 | 94.39749462 | 143.5411524 | 233.2786071 | 328.857072 | 406.0814055 | 530.3982763 | 616.6909856 | 539.6389768 | 511.4959233 |
| Bulgaria | 0.075034831 | 0.10713055 | 0.635749004 | 1.192803147 | 2.482595744 | 5.03902773 | 9.976947266 | 18.53734559 | 33.97603237 | 67.73642791 | 118.59874 | 172.547142 | 230.7747694 | 275.9650162 | 318.3463032 | 317.165647 | 311.0564135 | 251.0095038 | 267.2995323 |
| Burkina Faso | 0.062134408 | 0.062002975 | 0.117261794 | 0.341875341 | 0.404804497 | 0.890160377 | 2.031672978 | 2.63437926 | 5.217295055 | 9.80207484 | 13.74190937 | 22.31326657 | 31.77325139 | 45.21431613 | 65.69424553 | 86.85266874 | 82.29339236 | 84.51184416 | 83.6635133 |
| Burundi | 0.037003089 | 0.050118378 | 0.133071704 | 0.309618936 | 0.60636163 | 1.114522694 | 1.974041355 | 3.555106959 | 6.519827817 | 10.8606347 | 17.62404799 | 26.32688682 | 35.88492296 | 43.21958181 | 49.06649652 | 62.41747076 | 71.77982815 | 65.77720666 | 59.95326911 |
| Cabo Verde | 0.079504849 | 0.103434303 | 0.295793103 | 0.834292723 | 0.561123859 | 1.298351898 | 3.331863836 | 3.962897381 | 8.170982391 | 14.86164552 | 21.45143387 | 34.00991094 | 51.14289752 | 77.70355766 | 119.381914 | 187.0000099 | 211.033799 | 210.2311308 | 219.0681277 |
| Cambodia | 0.074454728 | 0.10622352 | 0.597107699 | 1.067550204 | 1.635354757 | 2.953066458 | 4.880189883 | 8.346764758 | 14.94772222 | 27.56015602 | 40.48144936 | 58.38324683 | 78.58877576 | 97.70891785 | 117.2019586 | 131.1125742 | 146.5225027 | 126.7565719 | 134.3649437 |
| Cameroon | 0.086168564 | 0.095344693 | 0.190834828 | 0.577442922 | 0.629061364 | 1.405335363 | 3.209696909 | 4.055673299 | 7.811501787 | 14.52511332 | 20.3565303 | 34.77145041 | 49.38297456 | 67.8073492 | 96.91133727 | 128.7845788 | 122.0746331 | 122.1854523 | 122.6569976 |
| Canada | 0.128297067 | 0.1482356 | 0.357769477 | 1.015069285 | 2.519900369 | 5.568591035 | 10.35493134 | 20.05735676 | 34.65867236 | 64.5964333 | 102.6219439 | 158.4696927 | 229.8830764 | 316.3209312 | 423.1461291 | 504.0195882 | 527.4593145 | 493.085839 | 688.2731635 |
| Central African Republic | 0.039868969 | 0.037524854 | 0.134910739 | 0.270131566 | 0.49162119 | 1.005739556 | 1.831898977 | 3.205560412 | 6.350836337 | 11.00515405 | 16.96163436 | 22.97986671 | 29.27190767 | 34.95862843 | 40.87542004 | 47.73620668 | 54.16339142 | 52.61520268 | 46.78794104 |
| Chad | 0.076737942 | 0.072559436 | 0.123390982 | 0.34886062 | 0.378475581 | 0.831953153 | 1.895358307 | 2.386874037 | 4.984200546 | 9.764867013 | 13.51199103 | 22.91919787 | 32.42235758 | 46.33177867 | 63.9162982 | 82.02337551 | 78.87777313 | 78.80523983 | 76.8757247 |
| Chile | 0.0551611 | 0.083609358 | 0.375891821 | 0.793785893 | 1.705048048 | 3.256798339 | 6.142343157 | 8.846031967 | 17.09391503 | 28.69920535 | 47.72897466 | 72.57171236 | 116.2244125 | 159.7960007 | 211.9575579 | 269.4609563 | 318.3783514 | 313.6028803 | 347.3181337 |
| China | 0.111358994 | 0.123452473 | 0.886832871 | 2.139920764 | 3.947196136 | 7.85603659 | 13.85584063 | 21.62401198 | 28.4204033 | 44.82794675 | 67.0322847 | 97.10841772 | 132.8381877 | 185.6380912 | 224.8094941 | 240.1189298 | 278.1112694 | 205.3925469 | 208.6927361 |
| Colombia | 0.10488581 | 0.129584944 | 0.696389212 | 1.527386656 | 2.729944568 | 3.910786543 | 6.248930692 | 9.414808953 | 14.45688073 | 22.96445197 | 34.96799649 | 55.80024256 | 75.36502368 | 105.3080136 | 133.7488477 | 152.9809157 | 159.6421978 | 131.726081 | 158.2875595 |
| Comoros | 0.043415723 | 0.06172559 | 0.129168166 | 0.363808166 | 0.722475153 | 1.339903611 | 2.382265039 | 4.200413662 | 7.45677431 | 12.3479737 | 19.58782716 | 30.59280687 | 42.50163292 | 53.93141358 | 63.54841817 | 82.91925726 | 96.25303035 | 91.51329852 | 85.69944256 |
| Congo | 0.044507595 | 0.048825672 | 0.195052145 | 0.411500926 | 0.791372982 | 1.622715749 | 2.982386089 | 5.146033657 | 9.870073464 | 17.44035209 | 28.0707923 | 40.47802756 | 54.65751661 | 69.57257678 | 88.96422979 | 106.9697104 | 130.8808586 | 128.7126763 | 127.3606507 |
| Cook Islands | 0.0344788 | 0.040107894 | 0.342949916 | 0.632664917 | 1.521823677 | 2.490894782 | 4.155510767 | 6.172604371 | 11.70821665 | 18.69205387 | 28.46679279 | 38.93009539 | 53.62309666 | 67.60033099 | 86.27778124 | 110.3706942 | 149.1455053 | 102.9866297 | 239.678178 |
| Costa Rica | 0.0889211 | 0.155347592 | 0.926899078 | 2.172630015 | 3.706974388 | 6.243354715 | 9.396323921 | 13.75752085 | 23.32215225 | 38.00621831 | 59.64691943 | 94.52520274 | 130.3020169 | 167.3384109 | 229.7559671 | 277.1381444 | 320.2764066 | 281.572075 | 357.2370454 |
| Croatia | 0.080378728 | 0.080941085 | 0.350182774 | 0.935297181 | 2.122147807 | 4.127415262 | 9.30953877 | 17.02298622 | 32.37390469 | 63.53641958 | 112.7417998 | 169.6955612 | 250.9097536 | 330.7197558 | 422.3977496 | 495.4373656 | 522.1297516 | 448.3671684 | 567.7907613 |
| Cuba | 0.088485477 | 0.112117318 | 0.533499537 | 0.922906812 | 1.582241071 | 3.265576432 | 6.567590995 | 12.68682785 | 21.67757301 | 38.5171694 | 64.30336476 | 113.1311599 | 167.6610676 | 229.1906455 | 316.664405 | 362.4626628 | 373.1208987 | 338.9319371 | 351.8645519 |
| Cyprus | 0.133340975 | 0.121667321 | 0.281421724 | 0.586130114 | 1.473370496 | 2.389082923 | 5.52545074 | 11.02434041 | 21.15045157 | 38.69215995 | 64.68824007 | 104.8050845 | 167.5482687 | 240.7880506 | 359.4085682 | 485.959538 | 580.2312152 | 496.5332971 | 567.6035482 |
| Czechia | 0.061871064 | 0.06901892 | 0.308162391 | 0.645982733 | 1.459766546 | 3.4080626 | 6.272286472 | 12.70977136 | 27.06335555 | 49.74013722 | 92.75554076 | 149.0610727 | 225.1073287 | 296.750331 | 344.8729685 | 392.3378337 | 413.0142111 | 321.903669 | 342.315224 |
| C么te d'Ivoire | 0.073255005 | 0.080918868 | 0.167746166 | 0.499024925 | 0.520529778 | 1.156099027 | 2.561912602 | 3.298888013 | 6.335018067 | 11.99417492 | 16.95110552 | 28.67859363 | 41.63593121 | 57.6063304 | 85.59201269 | 114.9588162 | 112.7849612 | 112.6354702 | 116.4912442 |
| Democratic People's Republic of Korea | 0.040333012 | 0.059004267 | 0.653529849 | 1.34906279 | 2.240726131 | 4.027828926 | 6.597270212 | 10.61061411 | 17.96970415 | 29.2416623 | 43.64845141 | 58.30696707 | 70.86160608 | 83.10152585 | 90.84128707 | 85.74404703 | 87.46434012 | 76.7407594 | 73.72647238 |
| Democratic Republic of the Congo | 0.030926478 | 0.031782156 | 0.114265282 | 0.234284586 | 0.413258821 | 0.860915986 | 1.487172399 | 2.530296352 | 5.035338092 | 9.372899012 | 15.07589202 | 22.15660944 | 29.67224462 | 37.93146988 | 46.22330055 | 56.49144113 | 66.79984588 | 68.40645499 | 69.99046999 |
| Denmark | 0.109279124 | 0.10532723 | 0.342666638 | 0.913623717 | 1.763874104 | 3.801016838 | 7.062832092 | 13.09744317 | 27.02523559 | 53.78308208 | 93.36915988 | 160.766785 | 225.602946 | 339.7049917 | 451.9138684 | 523.8370092 | 534.5011568 | 467.0598852 | 536.4549896 |
| Djibouti | 0.052896946 | 0.075231356 | 0.169482364 | 0.397371828 | 0.812582556 | 1.589541363 | 2.891266743 | 5.398029929 | 9.939111777 | 16.63600688 | 26.60641477 | 40.9353418 | 57.40505499 | 71.93652969 | 86.03968593 | 110.3580775 | 126.9098479 | 115.3186685 | 108.5949591 |
| Dominica | 0.08471569 | 0.124597607 | 0.594056142 | 0.949308759 | 1.577338649 | 3.032031045 | 5.254836095 | 8.167893415 | 13.05539175 | 22.61853406 | 37.47291023 | 57.96777664 | 89.72936895 | 126.748143 | 165.8754948 | 211.943977 | 239.1433154 | 251.3202855 | 251.2731261 |
| Dominican Republic | 0.140073555 | 0.12822744 | 0.614067707 | 1.019865241 | 1.82687633 | 3.724290013 | 6.122103759 | 9.260902325 | 14.90654585 | 25.64797081 | 34.57447603 | 57.28756272 | 66.3088973 | 103.8506771 | 117.6759693 | 146.3415088 | 207.7517985 | 204.375524 | 199.8679997 |
| Ecuador | 0.097382331 | 0.151849904 | 0.764221592 | 1.328390969 | 2.442801342 | 3.780576609 | 6.308051619 | 8.584910258 | 14.40962581 | 23.05380229 | 37.83047137 | 57.41153958 | 74.69437623 | 104.7949636 | 145.0642948 | 207.1774422 | 263.094662 | 307.9143567 | 359.2520557 |
| Egypt | 0.095803882 | 0.119424214 | 0.312872448 | 0.605304142 | 1.133490059 | 2.222814748 | 3.482214223 | 5.241529053 | 9.966139229 | 18.29037458 | 27.05777792 | 38.58777497 | 45.18874584 | 51.21712492 | 59.93486412 | 66.23670077 | 66.8058512 | 60.64600848 | 58.37873461 |
| El Salvador | 0.059262186 | 0.090843694 | 0.489518556 | 1.033845571 | 1.968507978 | 3.824283965 | 6.227434812 | 8.944230919 | 13.6237701 | 21.85701323 | 30.24271371 | 43.198407 | 58.83505635 | 78.78410074 | 104.0207952 | 122.7720108 | 140.5831961 | 113.1195525 | 136.817114 |
| Equatorial Guinea | 0.053247663 | 0.05794435 | 0.268911426 | 0.563567601 | 1.007206028 | 2.009808611 | 3.514815072 | 5.941757129 | 11.38687113 | 19.89788578 | 33.05962153 | 49.1218835 | 70.88073476 | 93.88517601 | 127.0884885 | 158.136315 | 189.814694 | 185.7795101 | 176.9358791 |
| Eritrea | 0.03509009 | 0.056422693 | 0.147066215 | 0.370967759 | 0.785271001 | 1.529792848 | 2.972828403 | 5.474699521 | 10.39760035 | 16.65703312 | 25.82766786 | 37.31113264 | 49.28623157 | 58.8407372 | 66.46828437 | 82.76994721 | 96.47527448 | 90.37287295 | 78.21464436 |
| Estonia | 0.066876041 | 0.102457121 | 0.763826269 | 1.002971405 | 1.97193041 | 4.608622912 | 7.760812516 | 14.23953034 | 27.3383334 | 46.91708574 | 85.10017526 | 141.1384234 | 202.2331003 | 298.5426002 | 369.872805 | 433.8495341 | 417.0354962 | 375.0332153 | 399.6871752 |
| Eswatini | 0.089136939 | 0.091327537 | 0.280922267 | 0.526582503 | 1.011385927 | 2.099188564 | 4.039489189 | 7.234521887 | 13.04783061 | 22.14856852 | 32.2803518 | 43.963603 | 61.42087956 | 78.57778916 | 108.0815723 | 145.9836032 | 169.4963978 | 160.9204243 | 127.4864905 |
| Ethiopia | 0.023903201 | 0.034559383 | 0.111091799 | 0.271208679 | 0.589146239 | 1.199641224 | 2.106179382 | 3.734413957 | 6.937302164 | 12.08918751 | 17.74561048 | 26.74492147 | 35.39703495 | 43.58701986 | 51.37777851 | 70.46661039 | 80.6007279 | 80.80021452 | 76.67118064 |
| Fiji | 0.115375951 | 0.119535088 | 0.674470528 | 0.83852725 | 1.684028739 | 2.24588339 | 3.624664635 | 5.488358286 | 11.70241076 | 19.72582097 | 30.1718087 | 45.26107231 | 59.3538481 | 71.60118491 | 90.29618684 | 124.2120279 | 193.3324208 | 126.5318998 | 185.2385808 |
| Finland | 0.100447854 | 0.10976216 | 0.251651297 | 0.645363638 | 1.356494668 | 3.135573103 | 5.951136187 | 10.62053658 | 20.45194812 | 38.00137964 | 62.50163927 | 95.88068845 | 150.6926868 | 202.4081426 | 275.2867338 | 355.3936635 | 355.390979 | 300.200604 | 358.057557 |
| France | 0.082897729 | 0.083901572 | 0.225609671 | 0.628238289 | 1.614290725 | 3.541684988 | 7.435506206 | 13.68446141 | 25.96482267 | 47.71568059 | 80.87534953 | 126.1024159 | 180.6687768 | 235.7919546 | 304.1114408 | 384.5236172 | 473.1523292 | 502.6575054 | 714.9573955 |
| Gabon | 0.058657176 | 0.063626321 | 0.291602889 | 0.581153248 | 0.990307397 | 2.037373043 | 3.710982201 | 6.575083889 | 12.77028744 | 22.77882692 | 37.76193608 | 55.86682672 | 78.21185085 | 98.73424722 | 123.6291061 | 147.4665255 | 175.8175755 | 176.0064576 | 180.9351385 |
| Gambia | 0.046635705 | 0.049171548 | 0.090385222 | 0.255521081 | 0.313891567 | 0.706758624 | 1.631260687 | 2.393805047 | 4.827016677 | 9.219142073 | 13.39827842 | 22.07709702 | 31.76581715 | 43.20214942 | 59.24892719 | 72.66047506 | 70.5907406 | 67.99598094 | 63.62466474 |
| Georgia | 0.057425804 | 0.077122614 | 0.961447435 | 1.657168236 | 2.373955805 | 4.254018339 | 6.863423283 | 11.64527089 | 19.20929783 | 33.08039515 | 53.47966043 | 72.32267566 | 89.9638044 | 115.5251521 | 131.0399651 | 125.5292048 | 82.67001905 | 71.3717665 | 67.43624386 |
| Germany | 0.113440218 | 0.124990389 | 0.3302251 | 0.835230751 | 1.89232792 | 4.078190493 | 8.216203424 | 15.14993171 | 26.71509057 | 50.11769583 | 81.52282559 | 125.7863555 | 184.7834219 | 267.8166122 | 353.0130433 | 442.8682071 | 539.1286133 | 495.0507451 | 537.6516957 |
| Ghana | 0.122452934 | 0.143511365 | 0.335707047 | 1.085886286 | 0.711019575 | 1.434654498 | 3.279549839 | 3.696834198 | 6.76817066 | 13.41904755 | 17.34256436 | 30.07088359 | 39.8434785 | 54.84951325 | 79.59635044 | 108.8035113 | 99.99467986 | 97.18554411 | 97.06292279 |
| Greece | 0.128284036 | 0.128249627 | 0.350300383 | 0.644896234 | 1.341903352 | 3.18306893 | 5.874656078 | 12.09770012 | 21.63630102 | 41.98349897 | 64.59834077 | 102.4525404 | 149.3445536 | 209.897489 | 290.1626246 | 358.592823 | 414.3023517 | 378.464153 | 462.5681096 |
| Greenland | 0.072476679 | 0.119236896 | 0.40564332 | 0.826203536 | 1.84088486 | 4.647892476 | 9.543684551 | 18.71402525 | 38.15447956 | 68.58102959 | 108.5905062 | 158.5025656 | 216.8560853 | 284.2840612 | 378.3230544 | 458.267852 | 529.0321563 | 473.0805994 | 515.7186078 |
| Grenada | 0.097693885 | 0.091615905 | 0.595717487 | 1.004063112 | 1.540102434 | 3.860094974 | 6.771803112 | 10.43082584 | 17.62336468 | 31.77034056 | 55.27487283 | 93.36292115 | 147.0445049 | 184.0500967 | 219.957353 | 262.1165343 | 303.8052297 | 279.3901593 | 273.3686194 |
| Guam | 0.12680762 | 0.162849672 | 1.377479506 | 1.585893364 | 3.621970084 | 6.107974332 | 9.148053486 | 12.51549465 | 21.12619429 | 39.04825763 | 54.20442847 | 70.9254039 | 94.08159993 | 100.5706676 | 122.7441933 | 142.243752 | 213.6844763 | 147.2371535 | 274.3362623 |
| Guatemala | 0.084008105 | 0.111318403 | 0.597604144 | 0.9600199 | 1.60617126 | 2.609874463 | 4.734509898 | 6.432542655 | 10.26193573 | 16.17937015 | 22.31026688 | 33.82151659 | 47.05771283 | 60.79784273 | 76.21012154 | 103.8849164 | 157.2185986 | 183.300146 | 183.3966238 |
| Guinea | 0.070536158 | 0.06840284 | 0.133923653 | 0.343790447 | 0.429235901 | 0.90894409 | 1.868033585 | 2.593784313 | 5.097774844 | 9.995131276 | 14.2906203 | 23.62520743 | 33.35531776 | 45.45597465 | 62.51974542 | 77.71651681 | 73.59506127 | 73.37527317 | 74.25454541 |
| Guinea-Bissau | 0.048895917 | 0.06543645 | 0.16032201 | 0.50337349 | 0.556046724 | 1.269332678 | 3.035081274 | 3.905124946 | 7.70111548 | 13.90995599 | 19.42551548 | 30.64781782 | 41.61720964 | 54.99175167 | 73.15829048 | 94.94443843 | 92.55495836 | 90.65081759 | 84.18505966 |
| Guyana | 0.100816609 | 0.102739691 | 0.511066462 | 1.072840619 | 1.919868184 | 4.021971635 | 6.494641863 | 10.58409164 | 16.83891942 | 29.43212376 | 45.2619497 | 63.48870976 | 79.04483457 | 101.3002082 | 135.0533229 | 160.642059 | 174.2675672 | 193.7092798 | 197.0258303 |
| Haiti | 0.120744361 | 0.077833872 | 0.283153136 | 0.461230097 | 0.819741476 | 1.712339253 | 2.929629583 | 5.178051144 | 9.016347276 | 16.32288941 | 25.99290012 | 38.78443458 | 52.58460034 | 69.01658788 | 87.35530678 | 105.2727384 | 117.0804688 | 114.6474498 | 100.5061753 |
| Honduras | 0.030544644 | 0.050947255 | 0.227207737 | 0.37078389 | 0.545733239 | 1.063047699 | 2.051393765 | 4.094479795 | 7.821863043 | 13.32561134 | 21.01030433 | 32.32776515 | 44.79281178 | 60.4140344 | 77.77894616 | 87.70228211 | 101.75201 | 102.1394573 | 102.6088239 |
| Hungary | 0.070736126 | 0.093503019 | 0.355901559 | 0.847523614 | 2.207554479 | 4.647892975 | 9.778028976 | 17.59916423 | 35.97385156 | 77.29295634 | 139.083141 | 208.0257614 | 276.7569097 | 343.8862809 | 392.3541338 | 388.4089133 | 408.442778 | 341.9688344 | 342.2637295 |
| Iceland | 0.091321894 | 0.085736643 | 0.241969205 | 0.689835143 | 1.377198591 | 2.755812541 | 5.715447272 | 10.88032005 | 19.65158885 | 37.28577703 | 63.11688437 | 98.20240966 | 144.8101452 | 198.7732129 | 265.1569179 | 322.3938194 | 346.2267817 | 315.4749723 | 420.0768279 |
| India | 0.064413426 | 0.067161569 | 0.184015388 | 0.41696522 | 0.611101817 | 1.373291939 | 2.315312994 | 3.834508797 | 7.874571553 | 13.18622192 | 19.20934488 | 26.25816458 | 36.28565555 | 49.60308909 | 65.66879103 | 91.93692314 | 87.88436742 | 81.41895377 | 74.48259359 |
| Indonesia | 0.084437696 | 0.121939469 | 0.679752016 | 1.102627858 | 1.704834437 | 3.081822957 | 5.133419326 | 8.668212956 | 15.26090295 | 27.53688689 | 40.76465379 | 61.41080893 | 86.94326354 | 112.6437093 | 137.1724494 | 159.163739 | 189.6013099 | 172.2502675 | 190.9382333 |
| Iran (Islamic Republic of) | 0.113650505 | 0.14588496 | 0.543679309 | 0.848510749 | 1.427391112 | 2.873029863 | 4.508016412 | 6.920106549 | 11.59803747 | 19.59869133 | 32.29994233 | 47.87591818 | 62.89196685 | 76.90316852 | 104.0207902 | 123.8818325 | 134.1302916 | 121.6466425 | 134.5535568 |
| Iraq | 0.061159779 | 0.071908114 | 0.404558777 | 0.763252709 | 1.11602327 | 1.927329494 | 3.546650862 | 6.436408321 | 11.8738507 | 19.49606206 | 27.86758762 | 37.18866326 | 49.38733724 | 60.02075325 | 76.19060765 | 90.72295462 | 99.91635474 | 84.52514835 | 74.86826889 |
| Ireland | 0.095663407 | 0.094040045 | 0.250426491 | 0.79368971 | 1.810374417 | 3.709814095 | 7.437573597 | 13.91923205 | 25.8138045 | 55.36788254 | 92.60920783 | 141.6488686 | 218.2022996 | 313.0560684 | 412.8633944 | 506.7806808 | 520.3554595 | 465.8023321 | 475.3549867 |
| Israel | 0.091375027 | 0.134820315 | 0.356190396 | 0.77359006 | 1.823018673 | 3.763487657 | 6.918655946 | 13.23194049 | 22.04428056 | 39.49756191 | 64.28696759 | 97.98557977 | 143.4147062 | 192.6873103 | 300.365339 | 380.0947153 | 466.2939649 | 461.3950578 | 598.0431805 |
| Italy | 0.095513833 | 0.11578711 | 0.292170383 | 0.723758784 | 1.64193105 | 3.763795375 | 7.908718909 | 15.74096189 | 29.96885381 | 59.67890603 | 94.85974618 | 146.1021193 | 211.6878041 | 278.8129252 | 356.87344 | 428.7543309 | 446.9361038 | 411.8534491 | 563.4997819 |
| Jamaica | 0.119515772 | 0.127531641 | 0.518502593 | 1.250093643 | 2.115478897 | 4.415886939 | 6.286958454 | 12.48201687 | 20.07335729 | 36.03233157 | 57.75845419 | 93.8056184 | 131.235413 | 169.1313431 | 202.0176581 | 206.0690912 | 216.7887571 | 182.2350807 | 191.8343707 |
| Japan | 0.127237452 | 0.097812652 | 0.44349984 | 1.090687538 | 2.143335452 | 4.753593427 | 10.6150858 | 20.075681 | 35.0261951 | 65.55464699 | 107.4636415 | 166.7874883 | 233.6916667 | 295.7281756 | 357.5322864 | 420.1758975 | 500.5454083 | 479.0418314 | 696.1938602 |
| Jordan | 0.091083341 | 0.110198518 | 0.388024171 | 0.734934446 | 1.146042444 | 2.589806672 | 5.27605694 | 9.40189542 | 15.03580269 | 28.90123283 | 45.97462668 | 67.91006497 | 90.37211184 | 102.2016393 | 142.0502039 | 165.0798014 | 199.73822 | 204.4851736 | 207.264825 |
| Kazakhstan | 0.036000706 | 0.041912038 | 0.387297826 | 0.727220665 | 1.381166469 | 2.579220497 | 4.848044674 | 8.145435086 | 14.96435788 | 26.39620579 | 45.64842379 | 74.7112452 | 108.8323815 | 131.7281557 | 154.504218 | 159.7793768 | 121.9312569 | 112.5578396 | 117.8306541 |
| Kenya | 0.027381124 | 0.035103199 | 0.097532101 | 0.246120181 | 0.538810801 | 1.135665072 | 2.103250218 | 3.779485763 | 7.126860474 | 11.74222352 | 18.76958491 | 27.08756786 | 38.50047753 | 50.78136946 | 60.93322744 | 77.76969337 | 87.02248439 | 74.08734762 | 64.46405366 |
| Kiribati | 0.073338106 | 0.07527944 | 0.670614435 | 1.11868633 | 2.179723169 | 3.047354199 | 4.292878132 | 6.737692979 | 12.52713848 | 18.45792736 | 27.15825024 | 36.94060291 | 46.6991068 | 57.42001471 | 77.04896712 | 95.65851707 | 120.9277849 | 77.95571626 | 133.5012866 |
| Kuwait | 0.120350458 | 0.115320625 | 0.300563299 | 0.668607372 | 0.783223344 | 1.744090288 | 3.077274804 | 5.48233756 | 10.84430753 | 19.38505274 | 37.35407632 | 71.2625712 | 87.4439285 | 113.7863209 | 137.8893103 | 154.5449299 | 217.5154374 | 186.3781088 | 235.5949071 |
| Kyrgyzstan | 0.031627967 | 0.042048874 | 0.328882094 | 0.575131233 | 1.118064852 | 1.868175054 | 3.288258304 | 4.769377076 | 7.334018242 | 12.41681449 | 25.05169567 | 35.95564567 | 52.70502624 | 60.64295741 | 76.4700763 | 100.78613 | 108.4434348 | 97.36214975 | 63.05862134 |
| Lao People's Democratic Republic | 0.088616886 | 0.123933921 | 0.556273075 | 1.024375819 | 1.632870787 | 3.027839332 | 4.786542484 | 7.96091208 | 13.36240297 | 23.73151525 | 34.41561264 | 51.20082985 | 68.6737314 | 86.4780198 | 104.2555213 | 122.3288393 | 136.5955464 | 119.8202515 | 129.1651517 |
| Latvia | 0.052156722 | 0.062843441 | 0.365604516 | 0.901534861 | 1.664251236 | 3.541589061 | 6.084894268 | 10.23845666 | 18.67818622 | 38.81747086 | 63.80160758 | 103.239521 | 158.3325359 | 215.0180936 | 257.2291937 | 304.5434529 | 252.1569371 | 240.5434416 | 222.0223581 |
| Lebanon | 0.094493266 | 0.120833656 | 0.582924648 | 1.283380903 | 2.159667784 | 4.323188566 | 7.64992679 | 13.60348441 | 23.78006381 | 41.14757652 | 66.81535065 | 99.18339354 | 135.9432805 | 172.5728679 | 247.6735335 | 281.8062935 | 306.1229243 | 271.0768138 | 303.0687932 |
| Lesotho | 0.068484462 | 0.070326406 | 0.206788454 | 0.40386376 | 0.803658237 | 1.731529842 | 3.267301028 | 5.738710609 | 10.7458063 | 18.61771551 | 28.07361106 | 38.43942748 | 52.01404854 | 66.04969185 | 87.92485686 | 117.8578588 | 137.299734 | 130.2404462 | 100.7056532 |
| Liberia | 0.045418598 | 0.053407944 | 0.105271129 | 0.330678851 | 0.380864776 | 0.813976911 | 1.831819286 | 2.241750158 | 4.524324597 | 8.632964719 | 12.15901391 | 20.34676166 | 29.14501637 | 40.71982087 | 60.70675068 | 82.97318246 | 83.36941861 | 83.04029577 | 82.87464675 |
| Libya | 0.047115461 | 0.056440419 | 0.27467875 | 0.652485382 | 1.208162362 | 2.94536874 | 5.51759552 | 9.698341807 | 17.7105654 | 28.98217985 | 43.99301157 | 64.46255001 | 81.67272152 | 103.6916311 | 104.5073716 | 111.8996978 | 128.1133894 | 127.8294437 | 134.1226789 |
| Lithuania | 0.051658936 | 0.083156742 | 0.475213724 | 0.724801103 | 1.616734796 | 3.39022187 | 6.161798764 | 9.88041962 | 19.02753177 | 34.10488722 | 63.42329871 | 103.2830391 | 156.183894 | 193.1921452 | 239.9998651 | 273.9726262 | 268.8046959 | 232.6373728 | 237.335037 |
| Luxembourg | 0.081994052 | 0.08265724 | 0.298205658 | 0.805434886 | 1.716769612 | 3.6091664 | 6.836475806 | 11.67064201 | 20.72545436 | 38.38308544 | 65.01539118 | 112.4900595 | 176.3603181 | 255.5186827 | 348.7079854 | 407.7949783 | 448.7367854 | 410.3412114 | 556.5194588 |
| Madagascar | 0.029642078 | 0.048213183 | 0.124594302 | 0.325017404 | 0.66990464 | 1.255333159 | 2.143113946 | 3.733774286 | 6.630818771 | 11.04241597 | 17.40968717 | 25.99937621 | 34.77681277 | 42.32805093 | 48.22883225 | 61.83474345 | 73.51201255 | 68.80104356 | 62.94626426 |
| Malawi | 0.039190133 | 0.044740018 | 0.106457989 | 0.233188558 | 0.457833065 | 0.843530423 | 1.425324372 | 2.499111981 | 4.684575152 | 7.835053925 | 12.91386959 | 20.05579107 | 29.96217728 | 41.07693878 | 52.60303579 | 61.30319607 | 63.17611393 | 57.58708485 | 58.3486811 |
| Malaysia | 0.059907978 | 0.108339129 | 0.512018081 | 1.006512482 | 2.004903523 | 4.155462463 | 7.183005439 | 11.79886807 | 20.91555129 | 38.25322118 | 62.01225501 | 92.75427649 | 134.6692403 | 185.6456882 | 237.4235567 | 312.7246234 | 356.5485659 | 256.0916351 | 272.4723965 |
| Maldives | 0.031728792 | 0.040952548 | 0.168810498 | 0.3169878 | 0.717515634 | 1.560271118 | 2.984936979 | 5.122512289 | 9.436233274 | 17.16484415 | 26.68685 | 40.7184326 | 61.32327339 | 87.51745175 | 124.8787724 | 157.0643376 | 168.4006989 | 127.2362297 | 129.1835018 |
| Mali | 0.063892502 | 0.072432894 | 0.137895233 | 0.360922232 | 0.447825386 | 0.995165447 | 2.175605841 | 3.017594785 | 6.04174257 | 11.51117263 | 16.27205197 | 26.62400314 | 37.53477209 | 51.09626774 | 68.92827003 | 82.45180852 | 78.99657989 | 71.74202236 | 66.82260126 |
| Malta | 0.126978229 | 0.123688236 | 0.367812352 | 0.813996058 | 1.739099207 | 3.255199247 | 6.183801036 | 11.08420234 | 20.03687765 | 36.9425879 | 65.7491323 | 103.9806668 | 163.3480479 | 222.0835682 | 294.7949277 | 341.7353888 | 347.5302232 | 313.0212307 | 380.0235001 |
| Marshall Islands | 0.055936362 | 0.062817751 | 0.553757837 | 0.920318885 | 2.256932916 | 3.396330418 | 5.149636046 | 7.552036995 | 14.62728542 | 22.00674173 | 33.7739184 | 44.17077697 | 58.50158124 | 69.70939638 | 86.71965002 | 111.4171777 | 155.9221479 | 102.6442409 | 209.4304842 |
| Mauritania | 0.060198182 | 0.065090008 | 0.115899479 | 0.332600372 | 0.381883719 | 0.843718716 | 1.947478951 | 2.516022932 | 5.166213125 | 10.30299496 | 14.6383321 | 24.94218517 | 37.32734318 | 54.1940054 | 83.42109722 | 114.850555 | 116.9461518 | 114.0710095 | 113.4163661 |
| Mauritius | 0.055593716 | 0.067302886 | 0.652335822 | 0.880662622 | 1.510274295 | 3.206868007 | 6.33047548 | 10.23378492 | 16.72864647 | 36.21186478 | 43.81343274 | 67.17654851 | 100.3974541 | 118.1383631 | 133.4544688 | 158.5088202 | 165.2787316 | 131.892924 | 238.4637244 |
| Mexico | 0.05891624 | 0.090937252 | 0.436653302 | 0.963394659 | 1.865892584 | 3.124831815 | 5.460907618 | 9.06120713 | 13.70522587 | 22.62533252 | 33.30462211 | 48.13882926 | 66.10925467 | 84.53417565 | 107.6542949 | 128.658727 | 146.7853545 | 128.6123982 | 138.214501 |
| Micronesia (Federated States of) | 0.048506 | 0.059353729 | 0.603439691 | 1.101142439 | 2.611006526 | 3.988520147 | 5.104490404 | 7.327324374 | 16.01505241 | 26.14917602 | 38.83195502 | 50.17865007 | 64.09740246 | 78.29693807 | 98.67054666 | 128.2382888 | 169.5415371 | 111.6744002 | 214.6423054 |
| Monaco | 0.128922672 | 0.159556055 | 0.524935312 | 1.51412234 | 3.401410056 | 7.152455775 | 13.16672172 | 23.34441092 | 39.5952855 | 73.13960922 | 119.9158133 | 185.8205055 | 273.4318057 | 391.2320709 | 534.1921548 | 652.9076908 | 705.16765 | 639.6970471 | 804.5846208 |
| Mongolia | 0.021171434 | 0.020563624 | 0.127646032 | 0.748547756 | 1.313692023 | 2.560090586 | 4.407292307 | 6.285946182 | 9.029823322 | 18.04657226 | 24.61521642 | 34.21454618 | 53.86441849 | 61.83967235 | 75.39969148 | 91.89642038 | 105.164338 | 125.2276449 | 135.5624895 |
| Montenegro | 0.074287198 | 0.105878816 | 0.34371773 | 1.027757157 | 2.083218848 | 3.494890542 | 6.738984561 | 11.1183406 | 20.1678875 | 42.51851897 | 76.5653372 | 113.0115489 | 161.126859 | 196.3942069 | 236.0874493 | 247.8298169 | 247.5828827 | 213.8074233 | 234.3255403 |
| Morocco | 0.049142101 | 0.051890203 | 0.156224205 | 0.321441415 | 0.576742702 | 1.251214908 | 2.353142321 | 4.148504963 | 8.370108461 | 15.97743914 | 26.61920826 | 40.52800461 | 50.00203708 | 63.78065741 | 74.06079538 | 81.37339775 | 86.61147125 | 82.81899549 | 73.18120731 |
| Mozambique | 0.022261937 | 0.027168464 | 0.093614057 | 0.247364407 | 0.550056456 | 1.102316952 | 1.992137507 | 3.639141548 | 6.692704536 | 10.83459299 | 17.69802964 | 27.49514437 | 39.7723882 | 53.82478618 | 72.82216723 | 91.4992987 | 102.6757258 | 92.71033945 | 78.54690156 |
| Myanmar | 0.091439569 | 0.138279015 | 0.676263081 | 1.166189566 | 1.728377728 | 3.187430247 | 5.045473456 | 8.015957477 | 13.5341927 | 24.39683799 | 34.48696063 | 50.11798049 | 68.11201519 | 88.42868108 | 107.1813969 | 123.0337317 | 133.8593158 | 116.9232739 | 128.0600466 |
| Namibia | 0.054132366 | 0.05045346 | 0.153187813 | 0.287895371 | 0.533091423 | 1.085802991 | 2.121258789 | 3.88731302 | 7.58756806 | 13.54767458 | 20.58450907 | 29.50851586 | 43.49107616 | 59.54961568 | 82.5408539 | 105.1571854 | 111.3756702 | 91.60398158 | 71.50583721 |
| Nauru | 0.108961007 | 0.115999886 | 0.998560164 | 1.693941918 | 3.737672313 | 5.643150994 | 8.628372541 | 13.21448925 | 23.94244629 | 36.62128936 | 53.10680476 | 70.52135152 | 89.0081192 | 106.7569787 | 134.1790652 | 162.9279647 | 229.7579213 | 147.8408047 | 268.9706524 |
| Nepal | 0.031728629 | 0.032550009 | 0.115475361 | 0.231709626 | 0.34432593 | 0.74791716 | 1.309059398 | 2.342955906 | 5.005204363 | 7.786292366 | 11.51815497 | 17.2595593 | 25.51988501 | 36.38392623 | 48.71903165 | 64.13535187 | 71.57685793 | 64.36243862 | 57.75963046 |
| Netherlands | 0.107982687 | 0.135926121 | 0.317359208 | 0.737596153 | 1.798994001 | 4.143093277 | 8.959628107 | 18.04577884 | 34.23756756 | 66.24532296 | 112.4582707 | 177.1083132 | 270.4732402 | 367.6517533 | 463.4207792 | 574.1348384 | 647.1696046 | 639.9083283 | 817.8787848 |
| New Zealand | 0.132940106 | 0.12379653 | 0.47208295 | 1.324770727 | 3.027471772 | 5.734280328 | 10.2193975 | 19.6627373 | 34.09747049 | 61.98247572 | 101.9448541 | 153.6755282 | 248.6192929 | 386.705604 | 518.2665965 | 618.4534272 | 673.1077531 | 574.4194714 | 671.4141708 |
| Nicaragua | 0.097927087 | 0.113144336 | 0.620764688 | 0.821332074 | 1.224267254 | 1.835987045 | 3.311620787 | 6.16029546 | 10.76050217 | 20.16133692 | 30.94910747 | 48.15447586 | 68.61284916 | 98.85735399 | 146.4590008 | 185.2080182 | 196.2371047 | 169.5112062 | 172.0568496 |
| Niger | 0.048403989 | 0.050555849 | 0.088300399 | 0.245250795 | 0.299396424 | 0.651562952 | 1.457439558 | 1.838759468 | 3.735136879 | 7.516910761 | 10.19298001 | 16.85878724 | 24.10054757 | 34.23033012 | 50.45937423 | 66.95879022 | 64.8334908 | 65.05514247 | 63.4447527 |
| Nigeria | 0.050762308 | 0.050485638 | 0.078616548 | 0.218386901 | 0.332935745 | 0.761196095 | 1.724516597 | 2.456587921 | 5.174376176 | 10.12184908 | 15.08900777 | 25.53263868 | 38.84990172 | 57.28325248 | 89.14223374 | 114.9430621 | 109.8470513 | 100.6919401 | 95.97986999 |
| Niue | 0.114750989 | 0.121371803 | 1.027402213 | 1.378406144 | 2.735881328 | 3.908138631 | 6.161000065 | 9.65237896 | 18.87968711 | 31.39856432 | 49.17356545 | 69.45511145 | 92.88248006 | 111.1683689 | 139.9437076 | 168.9892124 | 221.6400166 | 142.9904487 | 279.3083795 |
| North Macedonia | 0.092653013 | 0.099319386 | 0.299463074 | 0.93809673 | 1.980832437 | 3.6518775 | 8.587988769 | 13.44955807 | 26.91929593 | 48.31421131 | 89.11577714 | 122.5091258 | 186.4011321 | 225.1530116 | 295.709637 | 291.4206513 | 272.148246 | 233.671248 | 259.3952855 |
| Northern Mariana Islands | 0.12349758 | 0.135666768 | 1.164100463 | 1.67162929 | 3.279564103 | 5.180786342 | 8.296528505 | 12.02320434 | 29.8891141 | 41.61495229 | 74.20898017 | 94.24686986 | 133.1716304 | 154.917118 | 198.4359362 | 227.0877774 | 333.681281 | 218.3560926 | 545.8287686 |
| Norway | 0.102267189 | 0.119439437 | 0.327236795 | 0.835518136 | 1.948580445 | 3.918266051 | 8.373334766 | 14.94100858 | 28.82803425 | 54.27962191 | 86.83723879 | 153.2249343 | 229.7695596 | 337.0458012 | 463.3762149 | 550.7423931 | 607.9928302 | 529.1954145 | 667.9372757 |
| Oman | 0.078312636 | 0.08609239 | 0.226881034 | 0.477981559 | 0.687905002 | 1.463469214 | 2.631100057 | 4.709316367 | 8.101812162 | 15.09456816 | 27.85610688 | 45.30278446 | 75.52846523 | 102.7637081 | 142.061452 | 188.7566956 | 172.939691 | 153.7426861 | 148.0068621 |
| Pakistan | 0.077293406 | 0.064669857 | 0.190586584 | 0.489265232 | 0.930728819 | 1.916939668 | 3.14917815 | 4.997481184 | 9.225262465 | 14.07319349 | 20.60059419 | 30.54673353 | 40.70933793 | 52.54963087 | 65.47762602 | 79.06331194 | 83.78780429 | 77.89602917 | 75.49071575 |
| Palau | 0.067811436 | 0.072391656 | 0.533370749 | 0.660222193 | 1.862911138 | 2.976558838 | 5.525546291 | 8.75610745 | 16.95394371 | 27.66936979 | 46.48019729 | 62.06231789 | 87.59301005 | 109.2491161 | 149.665837 | 203.7223662 | 249.5732019 | 158.5909064 | 291.1776389 |
| Palestine | 0.094360742 | 0.119891778 | 0.583419164 | 1.106994359 | 1.84735125 | 2.758570432 | 5.4976186 | 10.51891925 | 20.29589112 | 39.63265175 | 61.17689435 | 87.05021352 | 133.7657792 | 167.5614673 | 216.6012615 | 209.523553 | 227.1453384 | 186.7577014 | 218.3728189 |
| Panama | 0.077401217 | 0.114322867 | 0.473266682 | 1.053485892 | 1.754885645 | 2.975411196 | 4.837339161 | 8.497167165 | 15.9214668 | 25.39458695 | 39.82776281 | 57.53987706 | 84.78671327 | 117.3550753 | 139.2220716 | 170.5537642 | 212.9257898 | 177.5572327 | 232.0429094 |
| Papua New Guinea | 0.066833859 | 0.063908174 | 0.442590521 | 0.555992354 | 1.160541339 | 1.665132541 | 2.548802878 | 3.871926423 | 7.642681635 | 12.45801479 | 19.30799818 | 26.61334396 | 35.97935156 | 43.93857104 | 54.42781846 | 67.31677883 | 91.67521839 | 58.08332556 | 98.21623375 |
| Paraguay | 0.070699018 | 0.139521389 | 0.565132382 | 0.866763214 | 1.49250022 | 2.653276562 | 4.71120393 | 7.867515873 | 14.90271182 | 25.16213922 | 37.18026891 | 53.0058603 | 74.16389999 | 101.1029635 | 140.9246766 | 179.1919717 | 190.8865562 | 164.2424714 | 162.1070382 |
| Peru | 0.140053691 | 0.182442313 | 0.902052212 | 1.460309255 | 2.549320195 | 3.753074877 | 6.074142661 | 10.08492488 | 15.73042293 | 25.65878258 | 39.93083159 | 62.8512703 | 94.25935618 | 133.4193169 | 181.0672943 | 216.2481932 | 235.0953077 | 199.5943654 | 258.5045436 |
| Philippines | 0.158960224 | 0.196255075 | 0.703472704 | 1.516603204 | 2.677498829 | 4.867947936 | 7.741489166 | 11.7973661 | 19.36292204 | 32.0724997 | 47.62717308 | 67.18926746 | 91.22434168 | 106.4386077 | 117.4693826 | 127.7661055 | 139.4286629 | 123.1362119 | 112.7258372 |
| Poland | 0.051246926 | 0.071346919 | 0.311426244 | 0.623085856 | 1.276562828 | 2.854349636 | 6.386284788 | 12.078578 | 24.02177358 | 48.41889766 | 83.92001071 | 129.7937335 | 184.0382422 | 227.7804137 | 271.4776887 | 286.3840969 | 322.0437351 | 310.7586789 | 313.3389579 |
| Portugal | 0.130169773 | 0.148073285 | 0.418513149 | 1.324433774 | 2.599557505 | 5.397426791 | 11.59559629 | 21.35653077 | 40.45606691 | 70.75394637 | 110.9353244 | 160.0808494 | 215.6561408 | 269.3692535 | 332.1164225 | 373.1199229 | 401.174229 | 412.4746997 | 509.050099 |
| Puerto Rico | 0.051982304 | 0.046649726 | 0.376933086 | 1.078697272 | 2.226336488 | 5.01510355 | 10.28225665 | 19.34220495 | 31.00661145 | 56.83600589 | 90.69321911 | 117.6136626 | 168.4036303 | 197.7976411 | 250.3219603 | 279.3483679 | 325.6195836 | 273.9811921 | 358.4625133 |
| Qatar | 0.076365643 | 0.087463036 | 0.291411686 | 0.612677885 | 0.804904903 | 1.675624221 | 3.526675129 | 5.195455073 | 10.27989221 | 16.94142086 | 33.10340121 | 54.01673698 | 102.4754401 | 163.980499 | 284.1201243 | 395.3891585 | 417.3632704 | 318.9692173 | 309.5920789 |
| Republic of Korea | 0.117790575 | 0.097098035 | 0.433030768 | 0.900633014 | 2.06140105 | 4.201340537 | 8.40669241 | 15.52811855 | 25.01974523 | 46.59448292 | 70.89248657 | 104.8831462 | 157.5839196 | 234.487003 | 327.8865561 | 419.9240323 | 484.1706973 | 418.0807982 | 482.6959189 |
| Republic of Moldova | 0.127695329 | 0.149777144 | 0.579540773 | 1.169335749 | 2.027692395 | 4.199237045 | 6.687454601 | 11.46062355 | 21.97926221 | 42.60924662 | 80.15691331 | 129.2427127 | 182.6277905 | 202.2482853 | 194.3682319 | 148.6572456 | 116.7808521 | 92.00286203 | 58.92373796 |
| Romania | 0.194021727 | 0.249558768 | 0.836637026 | 1.336145439 | 2.631395958 | 4.428162016 | 8.707844626 | 14.9857498 | 29.25316803 | 55.09972189 | 93.52586459 | 136.0100646 | 187.5452656 | 245.6240977 | 284.0360956 | 265.9515662 | 219.6062129 | 137.4136811 | 120.6018286 |
| Russian Federation | 0.066260006 | 0.087486648 | 0.403490811 | 0.990807589 | 2.280136192 | 5.124491862 | 9.709814311 | 16.43898248 | 27.52739252 | 48.87496162 | 78.57832594 | 117.8549059 | 160.7925808 | 197.3321884 | 214.3471045 | 204.1893752 | 179.6036519 | 185.6797657 | 200.0240655 |
| Rwanda | 0.04093531 | 0.056801407 | 0.158388193 | 0.387815388 | 0.757829594 | 1.452615824 | 2.464918038 | 4.20577178 | 7.730879132 | 13.09318449 | 20.93083315 | 31.27430472 | 43.87573328 | 55.76051667 | 66.45290135 | 86.80174974 | 101.0412276 | 94.08487274 | 88.72479806 |
| Saint Kitts and Nevis | 0.117269628 | 0.115874393 | 0.662439743 | 0.997811408 | 1.213288078 | 2.085944707 | 4.016223259 | 8.683666228 | 18.39729683 | 40.54036506 | 70.30623994 | 106.8066876 | 158.7157727 | 209.4452021 | 267.9308376 | 300.4522937 | 304.2757871 | 262.805072 | 252.228285 |
| Saint Lucia | 0.078831287 | 0.075772136 | 0.389463743 | 0.77578606 | 1.441877286 | 2.958886635 | 4.803175645 | 9.002703797 | 14.84668352 | 24.25365378 | 36.98422588 | 55.84885941 | 76.32440785 | 109.0010692 | 133.3849184 | 163.9032787 | 221.6377351 | 255.1757744 | 270.3747007 |
| Saint Vincent and the Grenadines | 0.054081243 | 0.108565277 | 0.486917909 | 0.792219983 | 1.546243297 | 3.134214714 | 5.298946135 | 9.260083826 | 17.80295019 | 29.3852734 | 41.28669889 | 56.74550841 | 82.11754361 | 112.3455185 | 156.2267592 | 195.5858651 | 235.3166413 | 245.9724353 | 224.8558534 |
| Samoa | 0.054851933 | 0.04507391 | 0.247899149 | 0.393557727 | 1.102558247 | 1.893238516 | 3.725076166 | 6.125405248 | 12.30791246 | 20.34631379 | 32.23342523 | 44.40288286 | 60.67663659 | 73.94765427 | 89.66311145 | 101.4597489 | 125.5595455 | 79.56638137 | 109.4865316 |
| San Marino | 0.141585062 | 0.134632916 | 0.365481451 | 1.11721363 | 2.541928327 | 4.869967417 | 8.969329312 | 15.67091554 | 28.86777079 | 55.53584614 | 92.19953235 | 145.9606983 | 222.924808 | 324.4572264 | 442.5488394 | 556.9437754 | 649.5971057 | 608.6733246 | 812.1636993 |
| Sao Tome and Principe | 0.127186195 | 0.150490679 | 0.478164636 | 1.361161381 | 0.766325323 | 1.805548689 | 4.121326586 | 4.547982127 | 9.377519178 | 19.27163873 | 27.14002409 | 51.39482568 | 75.30958381 | 107.4880624 | 148.0893037 | 178.8724075 | 200.5450866 | 206.7626771 | 207.2228573 |
| Saudi Arabia | 0.044048792 | 0.053663513 | 0.21042536 | 0.549280574 | 1.217142566 | 2.723376092 | 5.218443451 | 9.472843597 | 16.04055977 | 26.8398451 | 38.92569668 | 53.9177989 | 70.77495457 | 83.16365294 | 103.5008237 | 118.3892477 | 129.7299668 | 112.0954946 | 128.4934093 |
| Senegal | 0.059836361 | 0.069107445 | 0.145737443 | 0.444881026 | 0.475704373 | 1.023201277 | 2.2916109 | 2.885641215 | 5.819489387 | 11.22971593 | 16.02231705 | 26.70960036 | 38.49740022 | 55.07384861 | 79.69513596 | 106.1048554 | 105.7153313 | 104.8818662 | 100.559126 |
| Serbia | 0.05726722 | 0.0732616 | 0.291839786 | 0.90085128 | 2.343160321 | 4.68919103 | 10.18083326 | 21.14789416 | 34.57468936 | 70.06190904 | 117.7068422 | 160.1805665 | 232.6459447 | 255.2959103 | 284.7436477 | 354.2568573 | 358.8611256 | 321.0964642 | 319.5998454 |
| Seychelles | 0.08336715 | 0.126924327 | 0.731943113 | 1.827578388 | 3.249707506 | 6.415930056 | 10.05105376 | 18.38151067 | 31.55595829 | 54.23140526 | 77.71370227 | 113.4109778 | 164.9355025 | 197.4649877 | 274.4618088 | 313.8074455 | 368.9459561 | 385.8682698 | 491.7791576 |
| Sierra Leone | 0.072378512 | 0.071004644 | 0.11888447 | 0.34939371 | 0.405280323 | 0.885318865 | 1.967004979 | 2.471517438 | 4.825787659 | 9.184438552 | 12.61509258 | 21.44649663 | 30.33446807 | 42.08976926 | 62.54726537 | 85.60408906 | 82.0804997 | 82.18166312 | 82.08308435 |
| Singapore | 0.10202178 | 0.153220844 | 0.544742469 | 0.891599366 | 1.448185956 | 2.764490576 | 5.393159522 | 10.63988492 | 22.04419498 | 47.96039036 | 84.43822358 | 124.3867297 | 194.2343323 | 274.4707534 | 363.8234808 | 418.9007851 | 428.2677902 | 403.9991166 | 505.0009968 |
| Slovakia | 0.089058978 | 0.101540851 | 0.340507665 | 1.005804045 | 2.483174773 | 5.029893336 | 10.2051156 | 18.43251689 | 37.87295548 | 76.35427297 | 125.9432947 | 208.2219344 | 296.6998786 | 372.1713041 | 468.2518687 | 511.2006855 | 493.8183446 | 405.3275427 | 412.1042868 |
| Slovenia | 0.05730388 | 0.11337124 | 0.328344973 | 0.88240359 | 1.845009447 | 3.739537193 | 8.192083816 | 14.87290038 | 27.59509733 | 61.5439488 | 91.96645033 | 148.2806215 | 207.9097786 | 279.1905348 | 333.7948338 | 361.3469025 | 331.7543255 | 302.7126453 | 349.2354439 |
| Solomon Islands | 0.049371675 | 0.069036644 | 0.670959132 | 1.109428589 | 2.70949046 | 3.872122478 | 5.937279202 | 8.517568267 | 15.99967116 | 23.95896532 | 33.68692018 | 40.80740891 | 51.37647201 | 58.14971145 | 70.02998842 | 79.81763145 | 101.923528 | 59.62603655 | 133.1713845 |
| Somalia | 0.02288497 | 0.032611117 | 0.081096163 | 0.193777087 | 0.39489807 | 0.742550172 | 1.344719864 | 2.500606303 | 4.629501738 | 7.913731283 | 12.61835896 | 18.05935449 | 23.94181275 | 28.79812577 | 32.08431527 | 39.58009513 | 44.78442907 | 41.05124597 | 36.00372185 |
| South Africa | 0.078316291 | 0.025665896 | 0.136768212 | 0.418143759 | 1.056048695 | 2.285765835 | 3.55632197 | 5.252649346 | 8.368316533 | 16.43844247 | 27.57943784 | 40.79180872 | 59.32577602 | 72.47582394 | 93.9339294 | 140.1696181 | 165.9414051 | 162.3503302 | 141.062698 |
| South Sudan | 0.045914887 | 0.060171231 | 0.139757196 | 0.335920262 | 0.68545307 | 1.33544766 | 2.322142638 | 3.981730952 | 7.476051928 | 13.17429738 | 21.34063476 | 33.1962388 | 47.20028253 | 61.98664063 | 75.1318718 | 96.33051051 | 110.4173156 | 100.6627546 | 92.86191246 |
| Spain | 0.135683564 | 0.138884214 | 0.326407464 | 0.820516412 | 1.821009434 | 3.971210474 | 8.040976595 | 15.74784328 | 32.13812619 | 69.6814491 | 112.1433573 | 166.418303 | 238.4956928 | 308.5799616 | 419.4328429 | 493.9462989 | 570.2543545 | 542.5704309 | 731.4160543 |
| Sri Lanka | 0.045240213 | 0.056359766 | 0.282492726 | 0.563837251 | 0.806766378 | 1.496301059 | 2.779525727 | 4.790821321 | 8.578319081 | 14.88969446 | 21.52608359 | 31.95256153 | 46.60255789 | 64.29996933 | 76.62372046 | 94.51069752 | 98.71256542 | 109.9186418 | 126.2339907 |
| Sudan | 0.05162891 | 0.054704563 | 0.168917184 | 0.371813487 | 0.722324303 | 1.559377819 | 2.679818955 | 4.40373715 | 7.48715964 | 12.46758402 | 18.72551809 | 28.37650691 | 38.23841666 | 49.00523088 | 59.28384446 | 69.6372702 | 73.87165711 | 64.84139592 | 62.69044652 |
| Suriname | 0.086604917 | 0.123214218 | 0.657028144 | 0.929692018 | 1.781144659 | 3.721599959 | 6.704292213 | 10.07415381 | 16.28758952 | 29.76780172 | 48.88041035 | 68.28517539 | 101.0856448 | 134.0183491 | 174.6407058 | 195.7952716 | 210.6541105 | 189.6998782 | 178.4197668 |
| Sweden | 0.099352832 | 0.123017528 | 0.329403368 | 0.948880425 | 1.878477678 | 3.180460867 | 6.162906612 | 12.71499809 | 23.98015391 | 40.89043334 | 64.58398892 | 114.9572283 | 173.285185 | 247.5771319 | 348.0879797 | 410.12473 | 435.5369356 | 374.3521085 | 383.277679 |
| Switzerland | 0.100148067 | 0.126098596 | 0.326304088 | 0.784619216 | 1.425959904 | 2.998240865 | 5.364255777 | 11.19430749 | 20.80206264 | 40.40873286 | 62.05175164 | 105.327088 | 160.2351219 | 215.2437446 | 285.9305114 | 378.7961932 | 428.2177341 | 360.6443352 | 406.9811848 |
| Syrian Arab Republic | 0.16511737 | 0.180892783 | 0.441320936 | 0.642519587 | 1.156130308 | 1.788453448 | 2.725308845 | 4.304082659 | 7.258479755 | 11.68908577 | 18.36470417 | 28.67322544 | 37.59569628 | 46.7791806 | 60.78634932 | 78.60598974 | 99.81215031 | 84.68130487 | 68.77067026 |
| Taiwan (Province of China) | 0.118911323 | 0.140450441 | 1.224678232 | 2.19243473 | 4.403340618 | 11.19523543 | 24.9413693 | 39.65592672 | 61.7451095 | 100.719068 | 152.7781507 | 208.8773604 | 272.6511409 | 359.2378929 | 451.3798028 | 498.2712863 | 509.2147212 | 421.9042001 | 545.1901055 |
| Tajikistan | 0.07056147 | 0.074621798 | 0.575073008 | 1.283143683 | 1.861849869 | 2.99186961 | 4.387711438 | 6.087646995 | 7.671004414 | 11.82316512 | 19.78391706 | 31.46496384 | 51.49483259 | 74.58562376 | 105.6040279 | 136.9907168 | 106.1641676 | 90.41604016 | 75.67111784 |
| Thailand | 0.072948429 | 0.120689979 | 0.548156304 | 1.050490312 | 2.10426668 | 4.511695251 | 6.645864982 | 10.16834165 | 16.89938681 | 27.21093579 | 39.36998957 | 56.14636855 | 77.64243435 | 98.98031611 | 118.2831458 | 136.5459408 | 143.7186755 | 151.346599 | 193.1398864 |
| Timor-Leste | 0.070937051 | 0.099353729 | 0.473924169 | 0.822074945 | 1.224674433 | 2.29724148 | 3.668826771 | 6.163915042 | 11.16956753 | 21.44397144 | 32.05591175 | 47.8134374 | 65.61441228 | 84.47232517 | 102.3689424 | 117.9956469 | 134.3277156 | 117.9659687 | 127.2507567 |
| Togo | 0.055339957 | 0.063999886 | 0.139412475 | 0.429654009 | 0.446358811 | 0.994090789 | 2.287652054 | 2.921561235 | 5.816374375 | 10.88136804 | 15.37474164 | 25.22083172 | 35.84752394 | 48.06302851 | 70.56008988 | 97.53710729 | 93.02256654 | 93.46787964 | 92.05034303 |
| Tokelau | 0.040435213 | 0.0531459 | 0.519755231 | 0.847815911 | 2.070022296 | 3.099491427 | 4.645564792 | 7.296515944 | 13.41236367 | 21.92086404 | 34.4190325 | 44.08478929 | 60.43828452 | 72.35330686 | 97.88385096 | 121.6762112 | 169.9146022 | 112.0081042 | 233.8023596 |
| Tonga | 0.032020695 | 0.034092151 | 0.288567076 | 0.37308005 | 0.836690839 | 1.31603089 | 2.191980618 | 3.336599251 | 6.993331054 | 11.87485579 | 19.78281076 | 26.21275107 | 35.32955361 | 42.60727948 | 58.74813445 | 81.51127654 | 115.3210067 | 83.29257529 | 140.8061421 |
| Trinidad and Tobago | 0.099795247 | 0.095368857 | 0.588980115 | 1.269375449 | 1.918009796 | 4.708595651 | 6.894619691 | 10.14349467 | 15.28129378 | 28.35174297 | 47.99862752 | 70.36580921 | 95.96557113 | 125.8764163 | 170.2219727 | 179.6854957 | 204.6850973 | 198.0361645 | 213.5572068 |
| Tunisia | 0.07830981 | 0.082411091 | 0.204836321 | 0.497033933 | 0.936787225 | 2.200198454 | 3.839399659 | 6.71294313 | 11.10903533 | 19.07189559 | 33.03582993 | 51.23384532 | 68.37839044 | 84.25930907 | 99.68382129 | 140.6897642 | 162.6121277 | 149.6811455 | 154.3498672 |
| Turkey | 0.146742928 | 0.144491901 | 0.438102414 | 0.934625318 | 1.894735813 | 3.362256732 | 6.225264614 | 10.35616435 | 16.91710644 | 29.48014534 | 47.70558311 | 73.5279641 | 96.09562673 | 122.6260151 | 148.7678675 | 179.9856227 | 193.720053 | 163.9945486 | 175.1112531 |
| Turkmenistan | 0.039062103 | 0.045643733 | 0.464677578 | 1.037953964 | 1.660850101 | 2.301525942 | 3.636625185 | 5.521441199 | 8.263080778 | 12.41257451 | 19.59540239 | 29.79418098 | 38.34859561 | 56.08667295 | 67.72312461 | 86.56482611 | 74.73905052 | 71.61247839 | 63.52530286 |
| Tuvalu | 0.047902933 | 0.054799032 | 0.518276666 | 0.896098092 | 2.07216939 | 3.193475867 | 4.80918171 | 7.205196608 | 13.30768911 | 20.28281579 | 31.21688252 | 41.36464186 | 55.3163834 | 66.43648815 | 85.4101735 | 110.7294227 | 152.0955619 | 101.0772496 | 207.095072 |
| Uganda | 0.047350588 | 0.073505153 | 0.224700098 | 0.525809783 | 1.020232247 | 1.964123839 | 3.367299875 | 5.781968921 | 10.55004666 | 17.59693343 | 28.40002544 | 42.71564461 | 60.47831991 | 73.25917653 | 86.36277942 | 107.2288789 | 121.2707731 | 114.4812759 | 106.6185127 |
| Ukraine | 0.077825579 | 0.127238595 | 0.975289972 | 1.559379479 | 2.684081014 | 4.656122437 | 8.990055982 | 16.73292971 | 28.04227354 | 50.94398382 | 85.68652487 | 128.1154747 | 172.8823951 | 202.02319 | 216.8454239 | 169.416706 | 143.899076 | 109.6959028 | 96.26944055 |
| United Arab Emirates | 0.025164801 | 0.0297951 | 0.107421603 | 0.387118028 | 0.743822446 | 1.748901333 | 3.125253227 | 5.863427372 | 11.66869975 | 21.01088942 | 43.76087505 | 65.05702975 | 98.96018613 | 127.1681188 | 141.5793091 | 244.7419821 | 380.3217206 | 394.4658297 | 467.1979053 |
| United Kingdom | 0.099983108 | 0.113683424 | 0.319122631 | 0.914277488 | 2.51631146 | 5.155146426 | 9.048192856 | 15.71487669 | 27.31487112 | 50.74324444 | 83.66970643 | 135.2679848 | 196.6362778 | 276.3919625 | 372.7952352 | 477.261907 | 546.9745931 | 522.7963068 | 660.7625772 |
| United Republic of Tanzania | 0.049381227 | 0.068761134 | 0.166121681 | 0.393927243 | 0.797385408 | 1.535996757 | 2.624101849 | 4.533872073 | 8.233243762 | 14.4167756 | 23.20858169 | 34.55584678 | 48.36915385 | 61.4026555 | 71.56971538 | 91.45899301 | 103.596744 | 98.28454997 | 92.5498772 |
| United States of America | 0.101036344 | 0.1138449 | 0.368624908 | 1.083143462 | 2.524846914 | 5.641211719 | 11.22042107 | 21.98603295 | 37.68987751 | 68.03336693 | 99.61374275 | 138.4093247 | 181.7399739 | 240.7055846 | 313.889213 | 381.4690876 | 423.5533092 | 374.5534708 | 479.4260897 |
| United States Virgin Islands | 0.10215668 | 0.113933508 | 0.68981113 | 1.081813099 | 1.717195375 | 3.833905124 | 8.450689326 | 17.37034308 | 31.96451749 | 59.59494124 | 95.81961052 | 139.7986894 | 201.6087124 | 267.8218455 | 350.5687822 | 417.2076491 | 472.6222019 | 446.1630575 | 461.6990851 |
| Uruguay | 0.062684883 | 0.105359886 | 0.581417781 | 1.399527801 | 2.338549117 | 4.599445953 | 8.465356604 | 13.60926976 | 24.4270841 | 45.61876863 | 75.97460589 | 121.3755583 | 180.8105725 | 264.0690362 | 335.3804721 | 406.9366866 | 492.0841899 | 478.0494666 | 552.3789557 |
| Uzbekistan | 0.057432027 | 0.06169416 | 0.485551402 | 1.008873277 | 1.620318483 | 2.93244243 | 4.276284643 | 6.03815335 | 9.721249748 | 15.18562642 | 23.96485618 | 38.46124786 | 45.46260595 | 69.31115389 | 104.2922154 | 166.8041102 | 172.5229978 | 128.8263587 | 110.9565378 |
| Vanuatu | 0.04775723 | 0.05026487 | 0.446483827 | 0.701139095 | 1.545128657 | 2.365725917 | 3.57290501 | 5.439344683 | 10.31188973 | 16.06225316 | 24.30803806 | 32.61219065 | 43.49530478 | 51.873116 | 65.47634392 | 82.72715664 | 118.2636217 | 77.49434052 | 160.3979914 |
| Venezuela (Bolivarian Republic of) | 0.061903075 | 0.106305784 | 0.768428784 | 1.546706798 | 2.267599974 | 3.302172521 | 5.392669756 | 8.574682986 | 14.71659034 | 26.79150587 | 41.44883799 | 62.49693162 | 85.20564448 | 117.4596699 | 148.9513995 | 165.3819664 | 154.4749512 | 125.3408403 | 144.1124339 |
| Viet Nam | 0.05223985 | 0.07099829 | 0.442223653 | 0.803571179 | 1.430202855 | 3.095379507 | 6.246102486 | 12.71819498 | 24.79130274 | 47.70067015 | 72.32116167 | 103.9536103 | 130.4309376 | 154.1661856 | 169.4496271 | 187.9610128 | 203.3900417 | 161.3351226 | 170.7520005 |
| Yemen | 0.036832972 | 0.040731632 | 0.095871229 | 0.228179665 | 0.494155305 | 1.107430396 | 2.094579087 | 3.944824187 | 7.159135351 | 11.93158133 | 17.85064038 | 26.11898211 | 34.18614182 | 43.66628896 | 52.18775627 | 60.83056485 | 65.84153847 | 59.51133664 | 57.91143479 |
| Zambia | 0.048824562 | 0.068854165 | 0.229412677 | 0.565131801 | 1.166241309 | 2.286987577 | 4.014274102 | 7.084478453 | 12.62302989 | 21.01526413 | 32.79983353 | 47.7081067 | 64.01813055 | 78.34509499 | 90.08848348 | 113.919084 | 136.0762445 | 126.0856321 | 118.1829481 |
| Zimbabwe | 0.048869374 | 0.06167879 | 0.240590947 | 0.510921151 | 1.066348263 | 2.176834517 | 3.98034158 | 6.91065505 | 12.56393795 | 20.40166068 | 29.54614228 | 43.40954126 | 59.79953852 | 81.56234624 | 109.2794774 | 128.7291583 | 147.3679732 | 136.1686125 | 108.5612129 |

**Table S2** Three regions with the largest and lowest number of incidence, death, or DALY.

| measure | sex | | | top three countries | | | | |  | buttom three countries | | |
| --- | --- | --- | --- | --- | --- | --- | --- | --- | --- | --- | --- | --- |
| 2019 ASR(per100,000 people) | | | |
| ASIR |
|  | both | | | Australasia(48.35) | | | High-income Asia Pacific(44.58) | High-income North America(42.71) |  | Central Sub-Saharan Africa(7.68) | South Asia(8.31) | Western Sub-Saharan Africa(8.72) |
|  | female | | | Australasia(41.07) | | | High-income North America(35.85) | Western Europe(33.87) |  | Central Sub-Saharan Africa(6.66) | Eastern Sub-Saharan Africa(7.98) | Western Sub-Saharan Africa(8.17) |
|  | male | | | High-income Asia Pacific(58.74) | | | Australasia(56.41) | Central Europe(54.4) |  | South Asia(8.31) | Central Sub-Saharan Africa(9.07) | Western Sub-Saharan Africa(9.32) |
| ASDR |
|  | both | | | Central Europe(23.57) | | | Southern Latin America(21.22) | Eastern Europe(18.3) |  | South Asia(7.29) | Central Sub-Saharan Africa(7.45) | Western Sub-Saharan Africa(8.41) |
|  | female | | | Southern Latin America(17.55) | | | Central Europe(17.21) | Eastern Europe(15.06) |  | Central Sub-Saharan Africa(6.44) | South Asia(7.28) | Eastern Sub-Saharan Africa(7.67) |
|  | male | | | Central Europe(32.43) | | | Southern Latin America(25.96) | Eastern Europe(24.04) |  | South Asia(7.3) | Central Sub-Saharan Africa(8.84) | Western Sub-Saharan Africa(8.94) |
| Age Standardized DALY Rate | | | | | |
|  | both | | | Central Europe(512.56) | | | Southern Latin America(447.56) | Eastern Europe(423.7) |  | South Asia(165.06) | Central Sub-Saharan Africa(169.27) | Western Sub-Saharan Africa(176.11) |
|  | female | | | Central Europe(368.33) | | | Southern Latin America(362.99) | Eastern Europe(346.48) |  | Central Sub-Saharan Africa(145.96) | Western Sub-Saharan Africa(161.45) | South Asia(166.21) |
|  | male | | | Central Europe(694.45) | | | Southern Latin America(550.22) | Eastern Europe(544.81) |  | South Asia(164.03) | Western Sub-Saharan Africa(191.99) | Central Sub-Saharan Africa(198.76) |
| 1990-2019 increase times | | | | |
| incidence(cases) | |
|  | both | | | East Asia(5.67) | | | Andean Latin America(5.49) | Central Latin America(5.02) |  | Eastern Europe(1.51) | High-income North America(1.55) | Central Asia(1.62) |
|  | female | | | Andean Latin America(5.34) | | | Central Latin America(4.59) | East Asia(4.42) |  | Eastern Europe(1.38) | High-income North America(1.45) | Western Europe(1.47) |
|  | male | | | East Asia(6.75) | | | Andean Latin America(5.65) | Central Latin America(5.52) |  | High-income North America(1.66) | Eastern Europe(1.68) | Central Asia(1.7) |
| Death(cases) |
|  | both | | | Central Latin America(3.92) | | | Andean Latin America(3.7) | Southeast Asia(3.47) |  | Eastern Europe(1.27) | Western Europe(1.32) | High-income North America(1.33) |
|  | female | | | South Asia(3.75) | | | Andean Latin America(3.7) | Central Latin America(3.62) |  | Eastern Europe(1.17) | Western Europe(1.19) | High-income North America(1.25) |
|  | male | | | Central Latin America(4.27) | | | East Asia(3.91) | Southeast Asia(3.78) |  | Eastern Europe(1.42) | High-income North America(1.42) | Western Europe(1.45) |
| DALY(Year) |
|  | both | | | Central Latin America(3.64) | | | Andean Latin America(3.3) | Southeast Asia(3.18) |  | Eastern Europe(1.15) | Western Europe(1.16) | Australasia(1.29) |
|  | female | | | Central Latin America(3.33) | | | Andean Latin America(3.27) | South Asia(3.23) |  | Western Europe(1.04) | Eastern Europe(1.05) | High-income North America(1.22) |
|  | male | | | Central Latin America(3.99) | | | Southeast Asia(3.54) | East Asia(3.35) |  | Western Europe(1.27) | Eastern Europe(1.28) | Australasia(1.33) |
| EAPC | | |
| Incidence |
|  | both | | | East Asia(3.61) | | | Andean Latin America(2.7) | South Asia(1.93) |  | High income North America(-0.62) | Australasia(-0.52) | Western Europe(0.04) |
|  | female | | | East Asia(2.48) | | | Andean Latin America(2.38) | Southeast Asia(1.52) |  | High-income North America(-0.62) | Australasia(-0.57) | Western Europe(-0.21) |
|  | male | | | East Asia(4.39) | | | Andean Latin America(3.04) | Central Latin America(2.44) |  | High-income North America(-0.72) | Australasia(-0.53) | Central Sub-Saharan Africa(0.09) |
| Death |
|  | both | | | East Asia(1.4) | | | South Asia(1.25) | Andean Latin America(1.16) |  | Australasia(-1.73) | High-income North America(-1.22) | Western Europe(-1.09) |
|  | female | | | Western Sub-Saharan Africa(1.13) | | | Andean Latin America(0.94) | South Asia(0.93) |  | Australasia(-1.72) | Western Europe(-1.33) | High-income North America(-1.23) |
|  | male | | | East Asia(2.21) | | | Southeast Asia(1.61) | Central Latin America(1.47) |  | Australasia(-1.82) | High-income North America(-1.33) | Western Europe(-0.99) |
| DALY |
|  | both | | | East Asia(1.24) | | | Southeast Asia(1.12) | Central Latin America(1.11) |  | Australasia(-1.89) | Western Europe(-1.17) | High-income North America(-1.07) |
|  | female | | | Western Sub-Saharan Africa(0.95) | | | Andean Latin America(0.82) | South Asia(0.77) |  | Australasia(-1.9) | Western Europe(-1.39) | High-income Asia Pacific(-1.14) |
|  | male | | | East Asia(2.09) | | | Central Latin America(1.57) | Southeast Asia(1.5) |  | Australasia(-1.92) | High-income North America(-1.11) | Western Europe(-1.08) |

**Table S3** Three countries with the largest and lowest number of incidence, death, or DALY.

| measure | sex | top three countries | | | |  | buttom three countries | | | | |
| --- | --- | --- | --- | --- | --- | --- | --- | --- | --- | --- | --- |
| 2019ASR(per100,00 people) |
| ASIR |
|  | both | | Taiwan (Province of China)(62.05) | Monaco(60.69) | Andorra(56.65) | | |  | Somalia(4.95) | Niger(5.63) | Bangladesh(5.63) |
|  | female | | New Zealand(48.38) | Netherlands(47.56) | Monaco(45.97) | | |  | Somalia(4.38) | Central African Republic(5.16) | Malawi(5.25) |
|  | male | | Andorra(85.17) | Taiwan (Province of China)(80.33) | Monaco(77.49) | | |  | Nepal(5.7) | Niger(5.72) | Bangladesh(5.77) |
| ASDR |
|  | both | | Greenland(31.38) | Brunei Darussalam(30.26) | Hungary(28.56) | | |  | Bangladesh(4.94) | Somalia(5.01) | Nepal(5.4) |
|  | female | | Greenland(29.34) | Qatar(25.85) | Brunei Darussalam(23.96) | | |  | Somalia(4.45) | Bangladesh(4.78) | Malawi(5.13) |
|  | male | | Brunei Darussalam(43.04) | Hungary(40.87) | Slovakia(37.67) | | |  | Bangladesh(5.06) | Nepal(5.27) | Niger(5.7) |
| Age Standardized DALY Rate |
|  | both | | Greenland(680.34) | Hungary(630.26) | Brunei Darussalam(626.13) | | |  | Bangladesh(107.39) | Nepal(115.83) | Niger(119.84) |
|  | female | | Greenland(639.09) | Brunei Darussalam(508.3) | Barbados(458.9) | | |  | Bangladesh(104.22) | Somalia(107.42) | Malawi(109.98) |
|  | male | | Hungary(884.52) | Brunei Darussalam(808.9) | Slovakia(795.34) | | |  | Bangladesh(109.88) | Nepal(111.55) | Niger(122.83) |
| 1990-2019 increase times |
| incidence(cases) |
|  | both | | Qatar(12.41) | United Arab Emirates(10.47) | Saudi Arabia(8.15) | | |  | Austria(0.99) | Ukraine(1.09) | Kyrgyzstan(1.1) |
|  | female | | Qatar(8.04) | United Arab Emirates(7.02) | Saudi Arabia(6.92) | | |  | Austria(0.83) | Ukraine(0.94) | Georgia(1.02) |
|  | male | | Qatar(16.28) | United Arab Emirates(12.52) | Saudi Arabia(8.95) | | |  | Nauru(1.11) | Kyrgyzstan(1.14) | Austria(1.16) |
| Death(cases) |
|  | both | | United Arab Emirates(8.03) | Qatar(7.31) | Guatemala(5.75) | | |  | Austria(0.79) | Ukraine(0.95) | Nauru(0.99) |
|  | female | | United Arab Emirates(5.98) | Equatorial Guinea(5.74) | Guatemala(5.7) | | |  | Austria(0.68) | Ukraine(0.81) | Niue(0.88) |
|  | male | | United Arab Emirates(9.39) | Qatar(9.24) | Kuwait(7.14) | | |  | Austria(0.92) | Nauru(0.96) | Kyrgyzstan(1.03) |
| DALY(Year) |
|  | both | | United Arab Emirates(8.73) | Qatar(7.44) | Guatemala(5.19) | | |  | Austria(0.7) | Czechia(0.9) | Ukraine(0.9) |
|  | female | | United Arab Emirates(6.68) | Qatar(5.72) | Equatorial Guinea(5.36) | | |  | Austria(0.61) | Ukraine(0.78) | Czechia(0.83) |
|  | male | | United Arab Emirates(10.06) | Qatar(9.09) | Belize(5.98) | | |  | Austria(0.79) | Czechia(0.95) | Kyrgyzstan(0.95) |
| EAPC |
| Incidence |
|  | both | | Equatorial Guinea(3.98) | Vietnam(3.79) | China(3.66) | | |  | Austria(-1.95) | Kyrgyzstan(-1.1) | Luxembourg(-0.8) |
|  | female | | Equatorial Guinea(4.39) | Vietnam(3.24) | Cape Verde(2.9) | | |  | Austria(-2.04) | Northern Mariana Islands(-1.44) | Iceland(-1.18) |
|  | male | | China(4.46) | Vietnam(4.12) | Lebanon(3.82) | | |  | Austria(-2.02) | Kyrgyzstan(-1.38) | Luxembourg(-0.84) |
| Death |
|  | both | | Equatorial Guinea(3.51) | Cape Verde(2.64) | Vietnam(2.64) | | |  | Austria(-2.81) | Singapore(-2.06) | Luxembourg(-1.99) |
|  | female | | Equatorial Guinea(3.91) | Lesotho(2.72) | Cape Verde(2.52) | | |  | Austria(-2.98) | Luxembourg(-2.1) | Bermuda(-2.03) |
|  | male | | Equatorial Guinea(3.17) | Dominican Republic(3.07) | Paraguay(3) | | |  | Austria(-2.86) | Singapore(-2.23) | Luxembourg(-1.99) |
| DALY |
|  | both | | Equatorial Guinea(3.06) | Lesotho(2.69) | Vietnam(2.67) | | |  | Austria(-3.09) | Singapore(-2.32) | Luxembourg(-2.11) |
|  | female | | Equatorial Guinea(3.52) | Lesotho(2.99) | Zimbabwe(2.22) | | |  | Austria(-3.12) | Bermuda(-2.25) | Singapore(-2.21) |
|  | male | | Dominican Republic(3.03) | Vietnam(3.03) | Paraguay(3.01) | | |  | Austria(-3.19) | Singapore(-2.46) | Kyrgyzstan(-2.18) |

**Table S4** The incident cases and age-standardized incidence rate of Colorectal cancer in 1990 and 2019, and its temporal trends from 1990 to 2019.

| nation | sex | Incidence Case NO(95% UI) | | Change in absolute number (%) | ASIR per 100,000 No. (95% UI) | | 1990-2019 EAPC No.(95 CI) |
| --- | --- | --- | --- | --- | --- | --- | --- |
| 1990 | 2019 | 1990 | 2019 |
| Afghanistan | both | 563.18(331.06-870.03) | 1168.26(749.04-1605.52) | 107.44 | 7.91(4.89-11.93) | 8.69(6.04-11.55) | 0.54(from 0.32 to 0.76) |
| Albania | both | 219.59(204.3-234.94) | 629.63(470.32-827.83) | 186.73 | 10.53(9.74-11.29) | 15.15(11.4-19.9) | 1.68(from 1.41 to 1.95) |
| Algeria | both | 889.55(718.72-1084.05) | 3407.37(2667.73-4281.64) | 283.04 | 7.81(6.43-9.33) | 10.52(8.35-13.05) | 1.03(from 1 to 1.07) |
| American Samoa | both | 4.12(3.36-4.81) | 9.66(8.02-11.57) | 134.47 | 18.61(15.15-21.73) | 20.81(17.56-24.7) | 0.49(from 0.39 to 0.6) |
| Andorra | both | 28.63(22.07-38.38) | 79.46(60.28-100.67) | 177.54 | 53.3(41.79-70.73) | 56.65(42.79-71.9) | 0.15(from 0.04 to 0.27) |
| Angola | both | 300.87(208.64-433.48) | 1083.09(829.45-1388.77) | 259.99 | 7.85(5.54-10.96) | 10.02(8.06-12.55) | 0.94(from 0.75 to 1.14) |
| Antigua and Barbuda | both | 8.66(7.89-9.44) | 24.99(21.48-28.97) | 188.57 | 16(14.6-17.41) | 25.58(22.05-29.43) | 1.56(from 1.42 to 1.7) |
| Argentina | both | 8063.79(7711.15-8369.64) | 18696.78(14880.1-23361.58) | 131.86 | 25.29(24.12-26.29) | 34.68(27.56-43.36) | 0.93(from 0.76 to 1.09) |
| Armenia | both | 502.67(478.9-528.44) | 880.19(737.57-1035.17) | 75.1 | 18.13(17.29-19.1) | 21.37(17.85-25.01) | 0.6(from 0.46 to 0.75) |
| Australia | both | 9639.95(9198.17-9992) | 19344.58(15223.88-24451.26) | 100.67 | 49.59(47.32-51.49) | 47.04(36.95-59.55) | -0.51(from -0.66 to -0.35) |
| Austria | both | 5880.99(5618.8-6151.36) | 5847.01(4783.48-7108.92) | -0.58 | 50.14(47.99-52.36) | 33.07(26.71-40.55) | -1.95(from -2.12 to -1.77) |
| Azerbaijan | both | 693.68(641.93-747.99) | 1557.79(1280.25-1911.03) | 124.57 | 13.04(12.07-14.02) | 16.32(13.28-20.08) | 1.33(from 0.78 to 1.89) |
| Bahamas | both | 35.75(32.84-38.96) | 107.56(87.71-131.38) | 200.87 | 23.01(21.18-25.05) | 27.96(22.83-34.01) | 0.97(from 0.83 to 1.11) |
| Bahrain | both | 24.82(20.46-29.13) | 162.62(122.54-210.7) | 555.2 | 14.16(11.83-16.63) | 16.96(13.23-21.08) | 0.46(from 0.19 to 0.72) |
| Bangladesh | both | 2164.87(1600.05-2864.02) | 7167.16(4965.01-10209.42) | 231.07 | 4.66(3.4-6.23) | 5.63(3.9-8) | 0.57(from 0.43 to 0.7) |
| Barbados | both | 69.67(64.38-74.34) | 194.99(161.8-232.59) | 179.88 | 23.81(22.07-25.34) | 39.83(33.03-47.38) | 1.78(from 1.55 to 2.02) |
| Belarus | both | 3387.04(3252.73-3534.12) | 5395.65(4321.97-6836.97) | 59.3 | 26.19(25.17-27.28) | 34.12(27.11-43.36) | 0.23(from -0.08 to 0.54) |
| Belgium | both | 6564.32(6198.04-6876.1) | 8993.96(7126.21-11223.44) | 37.01 | 42.43(40.15-44.39) | 39.33(30.86-49.46) | -0.37(from -0.43 to -0.31) |
| Belize | both | 7.77(7.02-8.48) | 40.6(35.45-46.79) | 422.52 | 8.39(7.55-9.18) | 14.64(12.76-16.95) | 1.78(from 1.34 to 2.24) |
| Benin | both | 124.69(105.48-147.61) | 360.49(282.52-465.31) | 189.11 | 6.38(5.4-7.5) | 7.78(6.25-9.85) | 0.78(from 0.73 to 0.83) |
| Bermuda | both | 25.29(23.23-27.26) | 56.31(47.17-68.47) | 122.66 | 41.25(37.92-44.44) | 43.29(36.11-52.78) | 0.23(from 0.18 to 0.29) |
| Bhutan | both | 10.91(6.2-15.82) | 43.46(26.26-58.82) | 298.35 | 4.6(2.63-6.54) | 8.03(4.91-10.87) | 1.97(from 1.91 to 2.02) |
| Bolivia (Plurinational State of) | both | 300.54(214.43-376.57) | 1439.03(990.96-1910.52) | 378.81 | 9.68(6.99-12.1) | 16.89(11.6-22.44) | 1.82(from 1.74 to 1.9) |
| Bosnia and Herzegovina | both | 722.56(683.51-765.51) | 2057.52(1618.9-2570.85) | 184.75 | 18.01(17.01-19.13) | 34.91(27.54-43.53) | 2.83(from 2.47 to 3.18) |
| Botswana | both | 59.83(45.45-78.64) | 247.01(170.93-333.63) | 312.85 | 11.09(8.57-14.35) | 18.75(13.48-24.55) | 1.51(from 1.23 to 1.79) |
| Brazil | both | 10556.23(10180.56-10886.18) | 41935.35(39319.95-43998.81) | 297.26 | 12.12(11.58-12.52) | 17.77(16.64-18.65) | 1.41(from 1.19 to 1.62) |
| Brunei Darussalam | both | 38.16(31.97-44.97) | 138.44(121.53-158.7) | 262.79 | 40.74(34.27-47.57) | 49.38(43.44-55.88) | 1.27(from 1 to 1.53) |
| Bulgaria | both | 3518.58(3329.17-3703.71) | 6198.88(4975.35-7640.55) | 76.18 | 28.16(26.65-29.6) | 43.84(35.01-54.21) | 2.82(from 2.33 to 3.31) |
| Burkina Faso | both | 237.22(189.32-298.34) | 640.85(501.2-816.02) | 170.15 | 5.77(4.67-7.24) | 7.42(5.92-9.38) | 0.9(from 0.75 to 1.04) |
| Burundi | both | 187.43(148.4-240.95) | 334.77(236.6-483.54) | 78.61 | 7.96(6.36-10.07) | 7.35(5.32-10.43) | -0.41(from -0.5 to -0.33) |
| Cabo Verde | both | 11.14(10.06-12.39) | 56.3(45.34-66.44) | 405.39 | 4.77(4.32-5.27) | 13.39(10.67-15.73) | 3.08(from 2.8 to 3.36) |
| Cambodia | both | 428.83(328.24-554.01) | 1982.79(1562.53-2416.38) | 362.37 | 9.33(7.36-12.07) | 16.67(13.29-20) | 2.08(from 2 to 2.15) |
| Cameroon | both | 384.46(305.28-470.22) | 1266.78(932.68-1684.07) | 229.5 | 9.11(7.26-11.04) | 11.18(8.58-14.61) | 0.77(from 0.73 to 0.81) |
| Canada | both | 14717.6(13933.31-15383.52) | 33633.1(26448.1-42308.11) | 128.52 | 45.47(43.09-47.46) | 49.6(38.84-62.84) | 0.31(from 0.22 to 0.41) |
| Central African Republic | both | 85.23(62.61-109.4) | 137.65(97.99-192.04) | 61.5 | 7.31(5.65-9.36) | 6.31(4.65-8.68) | -0.4(from -0.46 to -0.33) |
| Chad | both | 143.51(110.89-179.89) | 391.13(300.12-512.83) | 172.55 | 5.21(4.04-6.5) | 7.32(5.68-9.41) | 1.32(from 1.25 to 1.38) |
| Chile | both | 1501.86(1425.53-1566.85) | 6005.59(4799.88-7550.9) | 299.88 | 15.58(14.76-16.27) | 25.1(20.08-31.56) | 2.01(from 1.89 to 2.12) |
| China | both | 105911(93808.32-119020.53) | 607900.06(521804.88-708420.39) | 473.97 | 12.52(11.15-14.03) | 30.55(26.37-35.5) | 3.66(from 3.37 to 3.95) |
| Colombia | both | 2045.97(1950.85-2128.11) | 9045.75(7009.87-11553.4) | 342.13 | 11.8(11.19-12.35) | 17.15(13.28-21.89) | 1.21(from 1.1 to 1.31) |
| Comoros | both | 16.72(9.74-22.63) | 42.81(31.39-55.08) | 156.04 | 7.73(4.71-10.3) | 8.96(6.63-11.43) | 0.4(from 0.29 to 0.51) |
| Congo | both | 123.75(81.57-166.04) | 302.64(218.87-404.85) | 144.56 | 11.78(8.15-15.41) | 11.94(9.05-15.43) | 0.01(from -0.19 to 0.21) |
| Cook Islands | both | 1.36(1.11-1.62) | 3.01(2.5-3.65) | 121.32 | 10.95(9.05-12.91) | 12.42(10.26-15.12) | 0.28(from 0.07 to 0.49) |
| Costa Rica | both | 256.07(239.22-271.64) | 1495.74(1161.03-1902.47) | 484.11 | 14.61(13.58-15.5) | 29.18(22.72-37.17) | 2.59(from 2.45 to 2.73) |
| Croatia | both | 2204.5(2071.4-2346.46) | 4409.03(3503.08-5472.45) | 100 | 35.03(32.89-37.28) | 50.47(39.91-62.58) | 1.62(from 1.44 to 1.81) |
| Cuba | both | 2400.38(2278.25-2504.38) | 6569.5(5388-7975.46) | 173.69 | 23.35(22.18-24.36) | 34.57(28.25-42.05) | 1.36(from 1.23 to 1.48) |
| Cyprus | both | 160.06(141.01-181.97) | 739.03(637.73-843.46) | 361.72 | 20.45(18.17-23.34) | 38.15(33.1-43.43) | 2.68(from 2.29 to 3.06) |
| Czechia | both | 6723.43(6471.54-6957.47) | 8839.33(7287.79-10730.15) | 31.47 | 48.79(46.99-50.49) | 42.14(34.45-51.15) | -0.72(from -0.96 to -0.47) |
| C么te d'Ivoire | both | 336.43(259.63-432.03) | 946.05(723.63-1198.67) | 181.2 | 8.85(6.93-11.3) | 9.59(7.65-11.87) | 0.04(from -0.06 to 0.14) |
| Democratic People's Republic of Korea | both | 2329.17(1734.69-3057.17) | 4986.19(3708.29-6464.44) | 114.08 | 13.93(10.79-17.85) | 15.42(11.47-19.91) | 0.47(from 0.32 to 0.61) |
| Democratic Republic of the Congo | both | 1009.48(784.76-1352.11) | 2194.38(1480.29-3260.84) | 117.38 | 6.74(5.22-9.2) | 6.36(4.24-9.58) | -0.36(from -0.69 to -0.03) |
| Denmark | both | 3159.64(3026.16-3282.87) | 5576.78(4363.77-7016.87) | 76.5 | 39(37.42-40.5) | 48.41(37.76-61.15) | 0.59(from 0.34 to 0.83) |
| Djibouti | both | 12.39(8.44-17.27) | 69.55(49.2-97.16) | 461.34 | 9(6.37-12.11) | 11.92(9.06-15.8) | 1.01(from 0.93 to 1.1) |
| Dominica | both | 11.14(9.8-12.46) | 17.86(14.74-21.73) | 60.32 | 15.39(13.58-17.28) | 19.85(16.29-24.15) | 1.1(from 0.98 to 1.21) |
| Dominican Republic | both | 305.59(269.94-343.37) | 1579.12(1133.31-2066.81) | 416.74 | 8.35(7.34-9.4) | 17.08(12.37-22.31) | 3.02(from 2.85 to 3.2) |
| Ecuador | both | 458.72(431.35-486.47) | 2850.23(2268.66-3612.81) | 521.34 | 8.77(8.19-9.31) | 19.25(15.35-24.31) | 3.2(from 2.93 to 3.48) |
| Egypt | both | 1803.83(1654.66-1963.02) | 6520.41(4675.57-9005.75) | 261.48 | 5.93(5.4-6.42) | 9.78(7.07-13.43) | 1.68(from 1.58 to 1.79) |
| El Salvador | both | 170.1(158.36-181.91) | 844.38(643.82-1096.18) | 396.4 | 5.65(5.22-6.06) | 14.12(10.72-18.33) | 3.01(from 2.62 to 3.42) |
| Equatorial Guinea | both | 12.45(8.47-17.05) | 72.77(45.2-107.67) | 484.5 | 6.38(4.39-8.6) | 15.6(9.84-22.43) | 3.98(from 3.68 to 4.29) |
| Eritrea | both | 66.71(46.86-89.07) | 279.03(210.95-365.4) | 318.27 | 6.5(4.66-8.72) | 10.34(8.12-13.21) | 1.35(from 1.08 to 1.63) |
| Estonia | both | 633.81(603-663.52) | 1117.51(892.33-1390.52) | 76.32 | 30.9(29.45-32.33) | 42.21(33.4-52.75) | 1.39(from 1.14 to 1.65) |
| Eswatini | both | 28.86(22.01-37.59) | 80.2(53.28-111.45) | 177.89 | 10.38(7.92-13.34) | 14.4(9.82-19.67) | 1.21(from 0.89 to 1.53) |
| Ethiopia | both | 1500.31(1078.71-2323.05) | 3198.83(2401.26-4461.25) | 113.21 | 7.32(5.14-11.44) | 7.7(5.78-10.75) | 0.06(from -0.22 to 0.34) |
| Fiji | both | 36.6(29.69-44.56) | 95.41(74.93-119.53) | 160.68 | 10.24(8.4-12.33) | 13.52(10.86-16.56) | 1.08(from 0.89 to 1.27) |
| Finland | both | 1867.7(1782.17-1951.96) | 3799.35(2973.47-4804.78) | 103.42 | 26.14(24.95-27.3) | 31.46(24.55-40) | 0.65(from 0.6 to 0.71) |
| France | both | 32302.05(30505.88-33815.87) | 52276.87(40682.34-65961.76) | 61.84 | 38.68(36.69-40.42) | 38.47(30.1-49.3) | -0.11(from -0.22 to 0) |
| Gabon | both | 80.59(52.87-121.06) | 166.02(118.93-210.11) | 106.01 | 14.75(9.83-21.87) | 16.38(12.14-20.32) | 0.23(from 0.17 to 0.29) |
| Gambia | both | 16.01(12.18-20.44) | 63.82(46.12-85.38) | 298.63 | 4.73(3.71-5.89) | 6.84(4.99-9.15) | 1.1(from 0.94 to 1.26) |
| Georgia | both | 970.69(891.51-1057.3) | 1096.29(920.44-1283.98) | 12.94 | 15.66(14.41-17.02) | 19.13(16.02-22.48) | 1.57(from 1.05 to 2.09) |
| Germany | both | 55726.36(53109.79-57807.75) | 78951.36(62925.15-101416.8) | 41.68 | 43.58(41.64-45.17) | 41.4(32.67-53.84) | -0.7(from -1.23 to -0.16) |
| Ghana | both | 388.15(314.8-477.36) | 1494.63(1164.63-1901.42) | 285.07 | 6.37(5.28-7.72) | 9.51(7.57-11.94) | 1.38(from 1.34 to 1.42) |
| Greece | both | 3842.91(3639.65-4034.39) | 7902.55(6276.25-9939.99) | 105.64 | 25.22(23.89-26.45) | 33.21(26.1-42.09) | 0.53(from 0.29 to 0.76) |
| Greenland | both | 12.75(11.2-14.61) | 31.9(26.31-37.87) | 150.2 | 37.79(33.7-42.75) | 47.44(39.57-55.72) | 0.37(from 0.07 to 0.67) |
| Grenada | both | 12.7(11.59-13.92) | 30.22(27.2-33.46) | 137.95 | 17.38(15.84-19.04) | 27.86(25.13-30.69) | 1.64(from 1.53 to 1.74) |
| Guam | both | 15.97(13.61-18.49) | 39.69(33.22-47.08) | 148.53 | 21.74(18.06-25.48) | 21.01(17.62-24.81) | -0.2(from -0.47 to 0.07) |
| Guatemala | both | 191.86(170.51-216.48) | 1290(1020.16-1618.96) | 572.37 | 5.41(4.83-6.06) | 11.51(9.18-14.4) | 2.61(from 2.24 to 2.97) |
| Guinea | both | 178.73(151-210.27) | 390.47(296.45-510.43) | 118.47 | 5.59(4.72-6.54) | 7.3(5.56-9.43) | 1.01(from 0.98 to 1.04) |
| Guinea-Bissau | both | 34.65(23.8-44.39) | 65.4(48.68-83.17) | 88.74 | 8.62(6.11-10.88) | 9.32(7.08-11.68) | 0.32(from 0.27 to 0.37) |
| Guyana | both | 54.59(47.24-62.29) | 115.61(90.21-146.72) | 111.78 | 14.5(12.67-16.43) | 18.71(14.85-23.58) | 0.75(from 0.56 to 0.93) |
| Haiti | both | 327.62(215.01-403.84) | 778.72(535.71-1065.23) | 137.69 | 10.23(6.74-12.43) | 11.45(7.97-15.43) | 0.57(from 0.48 to 0.66) |
| Honduras | both | 111.98(90.87-130.21) | 574.04(398.13-812.1) | 412.63 | 5.25(4.19-6.14) | 9.67(6.74-13.58) | 2.18(from 2.05 to 2.3) |
| Hungary | both | 6157.42(5919.26-6404.89) | 9872.57(8137.25-11904.63) | 60.34 | 42.22(40.57-43.89) | 52.24(42.96-62.9) | 0.52(from 0.28 to 0.75) |
| Iceland | both | 84.66(78.19-92.18) | 169.15(146.69-195.25) | 99.8 | 29.62(27.3-32.18) | 30.71(26.82-35.36) | -0.08(from -0.36 to 0.21) |
| India | both | 24320.46(21283.69-27796.85) | 95111.56(79686.84-110630.62) | 291.08 | 5.59(4.86-6.39) | 8.59(7.22-9.94) | 1.32(from 1.16 to 1.47) |
| Indonesia | both | 9508.98(7235.76-11370.58) | 39109.59(26894.96-49833.46) | 311.29 | 9.53(7.35-11.28) | 18.53(12.63-23.42) | 2.28(from 2.19 to 2.37) |
| Iran (Islamic Republic of) | both | 2162.14(1773.72-2612.98) | 10182.61(9380.6-11028.65) | 370.95 | 8.35(6.8-10.06) | 13.88(12.76-15.07) | 1.83(from 1.68 to 1.97) |
| Iraq | both | 631.69(459.76-867.54) | 2646.81(2045.34-3379.24) | 319 | 8.02(5.84-10.85) | 11.13(8.73-13.83) | 1.41(from 1.13 to 1.68) |
| Ireland | both | 1779.17(1692.21-1861.33) | 3431.44(2687-4294.68) | 92.87 | 43.76(41.69-45.74) | 45.95(35.89-57.72) | 0.13(from 0.04 to 0.23) |
| Israel | both | 1537.65(1453.23-1618.8) | 3893.19(3050.35-4899.63) | 153.19 | 31.87(30.08-33.55) | 33.64(26.3-42.59) | -0.61(from -0.97 to -0.26) |
| Italy | both | 33947.06(32569.17-35072.09) | 60514.4(50072.91-71460.43) | 78.26 | 38.37(36.84-39.6) | 43.54(35.99-51.56) | 0.29(from 0.03 to 0.56) |
| Jamaica | both | 252.64(235.42-268.25) | 772.48(621.8-960.09) | 205.76 | 14.03(13.09-14.89) | 25.95(20.82-32.26) | 2.3(from 1.95 to 2.64) |
| Japan | both | 71183.83(68046.35-73123.17) | 160210.9(130730.43-186830.81) | 125.07 | 42.2(40.23-43.4) | 47.59(40.18-55.59) | 0.27(from 0.17 to 0.36) |
| Jordan | both | 191.87(154.43-235.64) | 1257.9(1036.6-1520.49) | 555.6 | 14.11(11.37-17.35) | 19.14(15.96-22.86) | 1.29(from 1.16 to 1.42) |
| Kazakhstan | both | 2465.79(2337.71-2595.96) | 3378.11(2927.37-3878.27) | 37 | 19.24(18.26-20.23) | 19.72(17.18-22.45) | 0.4(from 0.22 to 0.58) |
| Kenya | both | 427.81(274.53-528.4) | 1783.56(1422.74-2205.87) | 316.9 | 5.26(3.39-6.51) | 8.24(6.68-10.05) | 1.74(from 1.6 to 1.87) |
| Kiribati | both | 4.3(3.48-5.21) | 7.83(5.79-10.47) | 82.09 | 11.2(9.11-13.4) | 11.45(8.7-15.08) | -0.12(from -0.19 to -0.05) |
| Kuwait | both | 63.99(57.49-70.28) | 454.4(376.53-544.56) | 610.11 | 10.12(8.97-11.3) | 17.78(14.65-21.32) | 2.81(from 2.36 to 3.26) |
| Kyrgyzstan | both | 430.17(403.31-459.89) | 472.34(411.81-540.82) | 9.8 | 13.94(13.07-14.92) | 10.52(9.21-11.99) | -1.1(from -1.37 to -0.83) |
| Lao People's Democratic Republic | both | 222.35(148.87-298.55) | 655.86(464.56-874.22) | 194.97 | 10.44(7.19-13.87) | 14.9(10.64-19.54) | 1.08(from 1 to 1.16) |
| Latvia | both | 905.16(866.18-945.3) | 1213.99(1015.23-1460.84) | 34.12 | 25.33(24.25-26.45) | 30.54(25.44-36.96) | 0.77(from 0.51 to 1.03) |
| Lebanon | both | 336.62(260.64-426.57) | 1554.77(1258.82-1990.74) | 361.88 | 15.46(12.13-19.4) | 29.83(24.07-38.13) | 2.94(from 2.72 to 3.15) |
| Lesotho | both | 60.52(47.22-86.81) | 145.6(104.33-194.32) | 140.58 | 6.5(5.09-9.32) | 12.01(8.83-15.54) | 2.54(from 2.37 to 2.7) |
| Liberia | both | 71.5(59.15-86.27) | 131.99(89.49-188.65) | 84.6 | 6.67(5.56-7.99) | 6.84(4.66-9.71) | 0.6(from 0.24 to 0.96) |
| Libya | both | 266.55(188.15-386.09) | 900.61(657.74-1179.85) | 237.88 | 14(9.91-20.12) | 17(12.41-21.83) | 0.96(from 0.75 to 1.17) |
| Lithuania | both | 1106.93(1060.33-1156.48) | 1668.88(1384.75-2008.33) | 50.77 | 24.65(23.6-25.8) | 29.2(24.01-35.37) | 0.7(from 0.5 to 0.91) |
| Luxembourg | both | 245.3(228.91-261.87) | 372.36(302.41-450.71) | 51.8 | 44.89(41.96-47.94) | 37.17(30.27-45.07) | -0.8(from -1.12 to -0.47) |
| Madagascar | both | 352.07(283.33-417.33) | 801.5(581.89-1077.94) | 127.65 | 6.8(5.5-7.93) | 7.33(5.41-9.73) | 0.2(from 0.13 to 0.27) |
| Malawi | both | 175.79(146.61-203.72) | 441.57(335.37-562.12) | 151.19 | 4.74(4-5.4) | 6.27(4.87-7.8) | 1.11(from 0.96 to 1.27) |
| Malaysia | both | 1642.92(1455.27-1836.66) | 7627.36(5969.98-9403.09) | 364.26 | 18.36(16.04-20.82) | 29.57(23.27-36.5) | 1.12(from 0.91 to 1.33) |
| Maldives | both | 8.67(6.03-11.11) | 41.05(33.61-48.96) | 373.47 | 10.01(7.4-12.5) | 13.8(11.28-16.4) | 0.77(from 0.57 to 0.97) |
| Mali | both | 259.85(219.45-302.74) | 675.06(529.19-853.16) | 159.79 | 6.49(5.52-7.53) | 8.11(6.43-10.13) | 0.77(from 0.72 to 0.82) |
| Malta | both | 119.53(110.11-129.53) | 303.34(255.52-360.81) | 153.78 | 28.1(25.83-30.43) | 32.92(27.83-39.12) | 0.58(from 0.42 to 0.75) |
| Marshall Islands | both | 1.9(1.58-2.28) | 4.69(3.47-6.13) | 146.84 | 11.48(9.49-13.88) | 13.71(10.51-17.43) | 0.64(from 0.58 to 0.71) |
| Mauritania | both | 83.2(62.25-102.49) | 173.42(129.95-220.3) | 108.44 | 8.55(6.41-10.5) | 8.84(6.8-11.08) | 0.22(from 0.05 to 0.39) |
| Mauritius | both | 76.22(71.62-81.55) | 344.17(278.3-422.61) | 351.55 | 10.41(9.73-11.13) | 19.77(16.12-24.16) | 2.1(from 1.92 to 2.28) |
| Mexico | both | 3350.85(3226.88-3428.75) | 17469.69(15042.24-20059.85) | 421.35 | 7.88(7.52-8.1) | 14.92(12.88-17.11) | 2.21(from 2.12 to 2.31) |
| Micronesia (Federated States of) | both | 5.59(4.23-7.09) | 10.63(7.27-14.21) | 90.16 | 11.95(9.18-14.98) | 15.36(10.93-20) | 0.79(from 0.75 to 0.82) |
| Monaco | both | 31.84(25.32-38.52) | 56.94(46.01-68.07) | 78.83 | 45.64(36.26-55.36) | 60.69(48.55-73.57) | 1.14(from 0.99 to 1.29) |
| Mongolia | both | 100.4(82.29-120.18) | 255.81(199.15-333.44) | 154.79 | 9.47(7.79-11.27) | 11.09(8.77-14.12) | 0.16(from 0.02 to 0.29) |
| Montenegro | both | 135.11(113.52-154.61) | 299.45(245.01-361.95) | 121.63 | 21.79(18.27-24.88) | 30.47(24.96-36.76) | 1.57(from 1.44 to 1.7) |
| Morocco | both | 904.74(725.79-1060.34) | 3213.41(2394.8-4071.89) | 255.17 | 6.66(5.24-7.81) | 10.34(7.7-13.02) | 1.44(from 1.27 to 1.6) |
| Mozambique | both | 269.19(221.01-321.12) | 900.29(648.64-1188.53) | 234.44 | 4.9(4.09-5.74) | 8.73(6.43-11.37) | 2.45(from 2.3 to 2.6) |
| Myanmar | both | 2185.93(1620.57-2969.74) | 6913.45(5085.31-9010.81) | 216.27 | 9.23(7.07-12.61) | 15.03(11.1-19.26) | 1.81(from 1.72 to 1.89) |
| Namibia | both | 40.76(32.27-50.07) | 132.9(103.02-171.62) | 226.05 | 5.81(4.62-7.05) | 9.74(7.69-12.25) | 1.93(from 1.85 to 2.02) |
| Nauru | both | 0.84(0.53-1.21) | 0.97(0.62-1.28) | 15.48 | 21.14(14.09-30.31) | 21.43(14.78-27.76) | -0.23(from -0.56 to 0.09) |
| Nepal | both | 334.3(223.48-456.69) | 1248.95(891.29-1726.71) | 273.6 | 3.62(2.35-5.05) | 5.88(4.22-8.15) | 1.71(from 1.48 to 1.94) |
| Netherlands | both | 8766.4(8319.03-9148.97) | 18773.93(14703.4-23598.15) | 114.16 | 43.93(41.77-45.81) | 55.39(43.29-69.76) | 0.84(from 0.73 to 0.96) |
| New Zealand | both | 2389.4(2267.03-2511.69) | 4326.32(3591.42-5137.16) | 81.06 | 61.45(58.21-64.59) | 55.34(45.72-65.79) | -0.53(from -0.63 to -0.44) |
| Nicaragua | both | 113.54(96.28-129.99) | 689.14(570.63-820.41) | 506.96 | 7.33(6.07-8.64) | 16.17(13.44-19.03) | 3(from 2.82 to 3.19) |
| Niger | both | 141.07(107.56-186.21) | 405.69(294.87-555.92) | 187.58 | 5.31(4.07-6.91) | 5.63(4.19-7.56) | 0.27(from 0.16 to 0.38) |
| Nigeria | both | 2586(1873.47-3447.48) | 7083.95(5312.01-8958.33) | 173.93 | 6.32(4.66-8.32) | 8.95(6.87-11.02) | 1.63(from 1.43 to 1.84) |
| Niue | both | 0.34(0.29-0.41) | 0.44(0.34-0.55) | 29.41 | 15.55(12.92-18.85) | 20.4(15.71-26.06) | 0.95(from 0.89 to 1) |
| North Macedonia | both | 359.92(328.66-387.5) | 1134.79(898.34-1416.17) | 215.29 | 19.27(17.6-20.75) | 35.36(28.19-43.94) | 2.28(from 2.01 to 2.56) |
| Northern Mariana Islands | both | 5.07(3.92-6.43) | 14.82(12.26-17.33) | 192.31 | 26.64(21.39-32.65) | 28.86(24.45-33.06) | 0.08(from 0.01 to 0.15) |
| Norway | both | 2790.69(2644.85-2905.49) | 4745.54(4025.82-5535.1) | 70.05 | 40.85(38.89-42.41) | 49.46(41.9-57.73) | 0.8(from 0.55 to 1.05) |
| Oman | both | 58.38(39.67-80.56) | 251.46(200.41-333.2) | 330.73 | 9.01(6.25-12.26) | 15.32(12.63-18.56) | 2.18(from 1.86 to 2.51) |
| Pakistan | both | 3110.85(2688.6-3576.29) | 10139.89(8099.69-12938.43) | 225.95 | 5.49(4.74-6.33) | 9.14(7.33-11.63) | 1.7(from 1.48 to 1.92) |
| Palau | both | 1.61(1.23-2.1) | 3.98(3.07-5.01) | 147.2 | 17.14(13.28-22.29) | 19.94(15.7-24.69) | 0.43(from 0.39 to 0.47) |
| Palestine | both | 148.58(101.1-206.47) | 615.74(521.5-716.23) | 314.42 | 17.05(11.58-23.6) | 26.12(22.15-30.27) | 1.57(from 1.27 to 1.86) |
| Panama | both | 176.46(163.63-187.99) | 772.07(598.94-978.59) | 337.53 | 11.83(10.94-12.64) | 18.61(14.45-23.57) | 1.6(from 1.51 to 1.68) |
| Papua New Guinea | both | 120.96(81.68-162.32) | 382.33(272.79-514.74) | 216.08 | 6.55(4.4-8.74) | 8.06(5.88-10.54) | 0.61(from 0.56 to 0.66) |
| Paraguay | both | 160.52(143-179.7) | 955.33(731.11-1218.35) | 495.15 | 7.3(6.48-8.2) | 17.37(13.38-22.12) | 3.23(from 3.05 to 3.4) |
| Peru | both | 1262.1(1081.79-1457.38) | 6804.67(5100.51-8907.76) | 439.15 | 10.6(9.06-12.25) | 21.24(15.91-27.77) | 2.73(from 2.48 to 2.97) |
| Philippines | both | 4662.98(4155.43-5204.39) | 15219.61(12312.65-18708.19) | 226.39 | 14.93(13.31-16.67) | 18.93(15.42-23.14) | 0.63(from 0.36 to 0.91) |
| Poland | both | 10521.17(10183.55-10780.06) | 24276.57(20748.27-28769.21) | 130.74 | 24.23(23.38-24.84) | 34.96(29.84-41.55) | 1.21(from 1.03 to 1.39) |
| Portugal | both | 4364.72(4178.56-4541.72) | 10244.7(8093.66-12945.77) | 134.72 | 32(30.61-33.25) | 45.29(35.23-57.72) | 1.11(from 0.82 to 1.39) |
| Puerto Rico | both | 774.52(730.15-813.98) | 2379.16(1863.75-3025.75) | 207.18 | 21.42(20.15-22.53) | 34.99(26.99-44.78) | 1.78(from 1.48 to 2.08) |
| Qatar | both | 15.38(11.92-19.91) | 190.81(137.01-258.28) | 1140.64 | 15.58(11.57-19.67) | 25.05(19.33-31.85) | 2.38(from 2.01 to 2.76) |
| Republic of Korea | both | 5026.54(4772.78-5316.16) | 32929.03(27484.11-39146.08) | 555.1 | 16.97(16.02-18.04) | 37.16(31.14-44.01) | 2.4(from 1.98 to 2.82) |
| Republic of Moldova | both | 1113.08(1067.53-1165.83) | 1691.2(1472.09-1927.05) | 51.94 | 24.62(23.62-25.77) | 29.17(25.39-33.14) | 1.46(from 0.9 to 2.02) |
| Romania | both | 4862.44(4676.49-5042.6) | 13038.52(10746.42-15541.48) | 168.15 | 17.29(16.62-17.92) | 36.16(29.52-43.3) | 2.41(from 2.22 to 2.6) |
| Russian Federation | both | 41738.59(40275.83-43259.1) | 71542.21(62883.73-81644.42) | 71.41 | 23(22.17-23.86) | 30.77(27.02-35.11) | 0.94(from 0.72 to 1.17) |
| Rwanda | both | 255.27(181.83-323.84) | 549.22(424.27-703.88) | 115.15 | 8.75(6.45-11.03) | 9.32(7.43-11.66) | -0.09(from -0.32 to 0.14) |
| Saint Kitts and Nevis | both | 9.44(8.57-10.28) | 19.78(16.37-23.41) | 109.53 | 25.44(23.33-27.59) | 31.11(26.32-36.41) | 0.69(from 0.54 to 0.84) |
| Saint Lucia | both | 12.58(11.64-13.53) | 38.11(32.14-45.1) | 202.94 | 14.68(13.56-15.75) | 17.96(15.15-21.2) | 0.35(from 0.13 to 0.58) |
| Saint Vincent and the Grenadines | both | 10.36(9.5-11.23) | 26.07(22.79-29.92) | 151.64 | 14.5(13.31-15.67) | 19.66(17.2-22.56) | 0.96(from 0.81 to 1.12) |
| Samoa | both | 10.22(8.42-12.46) | 18.44(14.61-22.8) | 80.43 | 11.82(9.84-14.3) | 12.76(10.27-15.68) | 0.12(from 0.07 to 0.18) |
| San Marino | both | 14.8(12.84-16.94) | 32.11(24.87-42.07) | 116.96 | 44.35(38.44-50.48) | 49.55(37.89-65.53) | 0.57(from 0.5 to 0.64) |
| Sao Tome and Principe | both | 5.98(4.77-7.11) | 16.27(11.66-22.08) | 172.07 | 9.7(7.93-11.41) | 16.46(12.02-22.22) | 1.86(from 1.79 to 1.94) |
| Saudi Arabia | both | 388.42(271.95-527.94) | 3166.98(2417.76-4019.12) | 715.35 | 6.64(4.6-8.96) | 15.36(12.16-18.83) | 3.04(from 2.84 to 3.24) |
| Senegal | both | 233.12(185.59-277.54) | 634.61(498.52-800.24) | 172.22 | 7.51(6.1-8.88) | 8.92(7.17-11.08) | 0.74(from 0.56 to 0.91) |
| Serbia | both | 3075.44(2523.83-3443.37) | 6788.95(5452.18-8445.52) | 120.75 | 27.33(22.22-30.62) | 43.55(35.07-54.26) | 1.86(from 1.71 to 2.02) |
| Seychelles | both | 10.81(9.79-11.85) | 38.58(33.82-44.05) | 256.89 | 19.14(17.36-20.99) | 35.7(31.42-40.58) | 1.76(from 1.48 to 2.03) |
| Sierra Leone | both | 112.63(88.74-136.88) | 243.73(185.29-315.66) | 116.4 | 6.03(4.8-7.3) | 7.09(5.48-9.11) | 0.77(from 0.61 to 0.94) |
| Singapore | both | 931.12(879.79-981.24) | 3093(2470.54-3846.75) | 232.18 | 42.95(40.48-45.21) | 39.93(31.93-49.46) | -0.47(from -0.62 to -0.32) |
| Slovakia | both | 2282.1(2171.14-2402.39) | 5202.76(4086.97-6574.31) | 127.98 | 38.16(36.33-40.06) | 56.45(44.36-71.04) | 1.35(from 1.17 to 1.53) |
| Slovenia | both | 803.45(620.57-1024.06) | 1726.16(1346.51-2221.52) | 114.84 | 32.94(25.35-41.98) | 41.05(31.88-52.95) | 0.69(from 0.4 to 0.98) |
| Solomon Islands | both | 13.85(8.56-20.08) | 41.46(26.06-55.56) | 199.35 | 9.32(6.21-13.17) | 12.36(8.44-16.09) | 0.81(from 0.68 to 0.94) |
| Somalia | both | 133.38(91.04-202.5) | 329.7(205.61-615.42) | 147.19 | 5.25(3.67-7.9) | 4.95(3.13-9.24) | 0.01(from -0.09 to 0.11) |
| South Africa | both | 2264.85(1953.09-2731.24) | 5565.63(5001.6-6289.06) | 145.74 | 11.03(9.38-13.51) | 12.88(11.62-14.5) | 0.57(from 0.38 to 0.77) |
| South Sudan | both | 234.11(139.42-384.58) | 366.62(236.24-552.19) | 56.6 | 10.09(6.1-16.37) | 9.92(6.56-14.66) | 0.02(from -0.07 to 0.11) |
| Spain | both | 19094.47(18176.05-19858.4) | 47432.09(37492.96-60136.9) | 148.41 | 35.28(33.51-36.64) | 50.14(39.34-63.84) | 1.26(from 1.15 to 1.37) |
| Sri Lanka | both | 595.76(535.8-658.36) | 2546.35(1895.63-3346.3) | 327.41 | 5.61(5.08-6.18) | 10.18(7.63-13.19) | 2.4(from 2.29 to 2.52) |
| Sudan | both | 484.39(365.77-716.21) | 1563.99(1105.5-2335.54) | 222.88 | 5.17(3.96-7.75) | 8.22(5.99-12.28) | 1.67(from 1.56 to 1.78) |
| Suriname | both | 36.77(33.12-39.83) | 127.74(105-151.61) | 247.4 | 14.32(12.95-15.51) | 21.61(17.85-25.57) | 1.51(from 1.27 to 1.74) |
| Sweden | both | 5049.14(4767.15-5279.93) | 7720.11(6589.95-8929.93) | 52.9 | 33.51(31.71-34.94) | 36.99(31.41-42.78) | 0.21(from -0.01 to 0.43) |
| Switzerland | both | 3206.43(3023.38-3380.55) | 5823.85(4528.8-7396.41) | 81.63 | 30.71(29.09-32.26) | 33.59(25.91-42.71) | 0(from -0.3 to 0.3) |
| Syrian Arab Republic | both | 343.01(265.04-435.96) | 1028.48(743.68-1374.9) | 199.84 | 6.2(4.81-7.87) | 8.54(6.26-11.28) | 1.06(from 0.84 to 1.28) |
| Taiwan (Province of China) | both | 4085.47(3940.32-4230.3) | 24210.06(19139.3-31206) | 492.59 | 24.9(23.96-25.77) | 62.05(48.91-80.05) | 3.23(from 2.92 to 3.54) |
| Tajikistan | both | 324.48(298.58-353.57) | 550.52(443.13-673.83) | 69.66 | 10.7(9.85-11.68) | 11.62(9.5-14.05) | 0.86(from 0.36 to 1.35) |
| Thailand | both | 4514.61(4008-5041.86) | 17396.91(12834.44-22839.08) | 285.35 | 12.59(11.12-14.08) | 17.18(12.71-22.51) | 0.55(from 0.26 to 0.85) |
| Timor-Leste | both | 22.1(16.27-30.27) | 111.65(76.5-143.95) | 405.2 | 7.6(5.71-10.13) | 13.91(9.69-17.85) | 2.54(from 2.26 to 2.82) |
| Togo | both | 85.32(71.26-101.87) | 279.75(204.75-368.43) | 227.88 | 7.13(6-8.46) | 8.22(6.14-10.53) | 0.45(from 0.4 to 0.5) |
| Tokelau | both | 0.14(0.12-0.18) | 0.18(0.14-0.24) | 28.57 | 10.88(8.65-13.52) | 14.11(10.54-18.35) | 0.93(from 0.89 to 0.98) |
| Tonga | both | 3.55(2.89-4.19) | 6.52(5.05-8.25) | 83.66 | 6.65(5.48-7.82) | 8.28(6.45-10.46) | 0.63(from 0.49 to 0.78) |
| Trinidad and Tobago | both | 156.93(147.75-165.37) | 386.81(295.99-497.69) | 146.49 | 19.03(17.9-20.03) | 21.07(16.12-27.06) | 0.25(from 0.12 to 0.37) |
| Tunisia | both | 440.13(355.33-522.92) | 1800.59(1299.68-2440.65) | 309.1 | 9.16(7.39-10.97) | 14.49(10.54-19.5) | 1.47(from 1.4 to 1.54) |
| Turkey | both | 5349.76(4272.06-6575.54) | 18103.61(14440.71-22118.91) | 238.4 | 14.74(11.65-18) | 20.56(16.42-25.01) | 1.54(from 1.04 to 2.05) |
| Turkmenistan | both | 187.33(178.25-197.04) | 353.89(284.43-438.74) | 88.91 | 8.98(8.56-9.44) | 9.19(7.47-11.33) | -0.1(from -0.6 to 0.4) |
| Tuvalu | both | 0.73(0.57-0.88) | 1.3(0.94-1.69) | 78.08 | 10.87(8.74-13.02) | 13.03(9.6-16.87) | 0.43(from 0.37 to 0.5) |
| Uganda | both | 424.05(345.34-501.28) | 1737.15(1348.14-2149.82) | 309.66 | 6.75(5.57-7.86) | 12.31(9.77-14.83) | 2.07(from 1.84 to 2.29) |
| Ukraine | both | 21516.18(20700.39-22345.36) | 23387.64(19879.5-27253.49) | 8.7 | 30.04(28.99-31.17) | 31.27(26.56-36.54) | -0.44(from -0.72 to -0.16) |
| United Arab Emirates | both | 72.84(48.16-100.76) | 762.26(520.53-1030.32) | 946.49 | 19.74(12.74-26.5) | 21.36(14.7-29.76) | 0.11(from -0.31 to 0.53) |
| United Kingdom | both | 38717.63(37267.8-39640.39) | 54428.88(45869.58-63942.15) | 40.58 | 42.73(41.17-43.7) | 43.6(36.6-51.5) | -0.08(from -0.15 to -0.01) |
| United Republic of Tanzania | both | 844.36(697.52-1034.87) | 2456.67(1925.53-3175.42) | 190.95 | 7.95(6.62-9.6) | 10.1(8.13-12.7) | 0.9(from 0.81 to 0.99) |
| United States of America | both | 153168.19(146890.91-157265.49) | 227241.91(197022.08-261375.29) | 48.36 | 47.64(45.84-48.85) | 41.86(36.15-48.2) | -0.73(from -0.85 to -0.61) |
| United States Virgin Islands | both | 21.66(18.47-24.8) | 79(65.51-92.47) | 264.73 | 26.44(22.61-30.13) | 43.04(35.69-50.62) | 2.08(from 1.8 to 2.35) |
| Uruguay | both | 1363.21(1294.02-1430.26) | 2162.18(1734.39-2690.32) | 58.61 | 35.04(33.24-36.73) | 39.49(31.56-49.54) | 0.34(from 0.24 to 0.45) |
| Uzbekistan | both | 1070.31(1016.9-1120.28) | 2404.19(2026.3-2825.71) | 124.63 | 8.85(8.4-9.26) | 12.82(11.1-14.7) | 1.28(from 1.15 to 1.41) |
| Vanuatu | both | 5.18(3.73-6.89) | 17.23(12.71-22.67) | 232.63 | 7.97(5.86-10.37) | 10.1(7.56-13.08) | 0.61(from 0.45 to 0.77) |
| Venezuela (Bolivarian Republic of) | both | 1059.92(1012.63-1110.18) | 5361(4063.95-7020.22) | 405.79 | 10.91(10.33-11.44) | 18.58(14.14-24.22) | 1.56(from 1.34 to 1.78) |
| Viet Nam | both | 3981.22(3206.59-4813.57) | 24869.45(19210.76-30955.96) | 524.67 | 9.93(8.03-11.94) | 26.36(20.58-32.37) | 3.79(from 3.64 to 3.93) |
| Yemen | both | 275.92(177.89-408.43) | 995.63(736.35-1350) | 260.84 | 5.66(3.65-8.25) | 7.39(5.56-9.99) | 1.32(from 1.17 to 1.46) |
| Zambia | both | 292.31(220.54-373.73) | 923.94(670.89-1200.82) | 216.08 | 10.34(7.9-13.05) | 13.62(10.14-17.44) | 0.88(from 0.82 to 0.93) |
| Zimbabwe | both | 413.39(361.47-470.06) | 934.58(709.12-1182.8) | 126.08 | 10.66(9.37-12.02) | 13.76(10.57-17.23) | 0.77(from 0.48 to 1.06) |
| Afghanistan | female | 286.81(154.06-493.9) | 648.18(373.07-958.92) | 126 | 8.2(4.75-13.54) | 9.04(5.78-12.64) | 0.54(from 0.31 to 0.78) |
| Albania | female | 97.73(88.69-106.83) | 290.88(216.88-378.13) | 197.63 | 8.85(8.01-9.7) | 13.26(9.87-17.38) | 1.78(from 1.59 to 1.98) |
| Algeria | female | 425.31(340.29-523.33) | 1482.07(1130-1903.24) | 248.47 | 7.53(6.11-9.22) | 9.55(7.41-12.08) | 0.88(from 0.85 to 0.92) |
| American Samoa | female | 1.67(1.32-2.03) | 4.17(3.39-5.17) | 149.38 | 15.89(12.43-19.36) | 17.51(14.26-21.61) | 0.42(from 0.26 to 0.58) |
| Andorra | female | 6.53(4.81-9.38) | 20.48(14.52-27.46) | 213.53 | 25.3(18.8-35.9) | 28.74(20.26-38.66) | 0.43(from 0.39 to 0.46) |
| Angola | female | 125.28(77.6-202.73) | 496.42(364.8-666.72) | 296.26 | 6.5(3.98-10.18) | 8.42(6.52-10.89) | 0.99(from 0.85 to 1.14) |
| Antigua and Barbuda | female | 4.79(4.21-5.38) | 15.31(12.89-18.05) | 219.51 | 15.15(13.35-16.96) | 29.31(24.74-34.42) | 2.08(from 1.95 to 2.2) |
| Argentina | female | 3681.28(3458.08-3875.74) | 8416.22(6676.44-10573.65) | 128.62 | 20.6(19.35-21.68) | 27.45(21.61-34.54) | 0.82(from 0.66 to 0.99) |
| Armenia | female | 270.33(250.97-292.66) | 475.68(393.1-562.72) | 75.96 | 17.25(16.05-18.71) | 20.08(16.65-23.69) | 0.6(from 0.5 to 0.71) |
| Australia | female | 4539.5(4265.49-4772.33) | 8736.39(6823.37-11022.09) | 92.45 | 42.38(39.91-44.52) | 39.7(31.05-50.3) | -0.55(from -0.71 to -0.38) |
| Austria | female | 2972.94(2791.24-3161.12) | 2471.07(1979.22-2993.64) | -16.88 | 40.47(38.16-42.88) | 24.95(19.85-30.51) | -2.04(from -2.18 to -1.89) |
| Azerbaijan | female | 329.82(300.72-364.7) | 713.33(546.56-934.06) | 116.28 | 11.02(10.04-12.18) | 13.95(10.53-17.92) | 1.45(from 0.93 to 1.98) |
| Bahamas | female | 16.64(14.98-18.44) | 48.32(38.69-60.33) | 190.43 | 19.18(17.3-21.22) | 23.06(18.49-28.57) | 0.94(from 0.74 to 1.15) |
| Bahrain | female | 9.17(7.55-10.99) | 46.5(35.88-59.16) | 407.06 | 11.39(9.47-13.58) | 13.03(10.2-16.25) | 0.49(from 0.2 to 0.78) |
| Bangladesh | female | 892.85(610.24-1208.15) | 3351.1(2175.61-4918.39) | 275.33 | 4.22(2.82-5.87) | 5.46(3.5-8.14) | 0.85(from 0.73 to 0.97) |
| Barbados | female | 38.23(34.62-41.85) | 103.25(84.1-124.43) | 170.04 | 22.11(20.16-24.13) | 38.01(30.97-45.94) | 2.27(from 1.98 to 2.57) |
| Belarus | female | 1886.11(1777.17-2001.53) | 2700.21(2147.05-3405.85) | 43.16 | 23.34(22.03-24.69) | 27.49(21.62-35.06) | -0.15(from -0.51 to 0.21) |
| Belgium | female | 3421(3159.32-3648.36) | 4075.22(3193.11-5095.68) | 19.12 | 37.09(34.54-39.48) | 31.63(24.81-39.71) | -0.66(from -0.74 to -0.59) |
| Belize | female | 4.2(3.74-4.67) | 17.87(15.16-20.69) | 325.66 | 9(8.01-10.03) | 13.19(11.2-15.39) | 1.46(from 1.08 to 1.84) |
| Benin | female | 52.06(42.24-62.9) | 170.1(132.55-219.03) | 226.72 | 5.17(4.18-6.27) | 6.87(5.48-8.67) | 1.14(from 1.08 to 1.2) |
| Bermuda | female | 12.66(11.29-14.12) | 25.46(20.64-32.06) | 101.14 | 35.96(32.18-40.1) | 33.94(27.57-42.67) | -0.54(from -0.72 to -0.37) |
| Bhutan | female | 5.88(3.35-9.13) | 21.83(13.68-31.31) | 271.39 | 4.81(2.7-7.28) | 8.27(5.3-11.84) | 1.8(from 1.75 to 1.86) |
| Bolivia (Plurinational State of) | female | 172.9(116.99-231.58) | 799.01(527.12-1095.34) | 362.11 | 10.42(7.21-13.8) | 17.94(11.94-24.53) | 1.76(from 1.69 to 1.84) |
| Bosnia and Herzegovina | female | 371.14(342.07-400.7) | 857.04(665.18-1079.94) | 130.92 | 16.58(15.28-17.92) | 26.22(20.37-33.15) | 1.94(from 1.68 to 2.19) |
| Botswana | female | 28.19(20.09-39.36) | 116.51(77.41-168.88) | 313.37 | 9.54(6.88-13.11) | 15.87(11.03-22.6) | 1.81(from 1.69 to 1.92) |
| Brazil | female | 5524.15(5265.41-5753.97) | 20794.74(19135.43-22204.15) | 276.43 | 11.94(11.28-12.46) | 16.01(14.73-17.1) | 1.07(from 0.85 to 1.29) |
| Brunei Darussalam | female | 15.49(12.87-18.88) | 57.93(48.44-68.16) | 273.99 | 31.73(26.39-37.92) | 38.65(32.9-44.91) | 1.11(from 0.95 to 1.26) |
| Bulgaria | female | 1580.95(1471.61-1698.25) | 2634.34(2104.99-3273.79) | 66.63 | 23.82(22.13-25.54) | 33.14(26.08-41.68) | 2.3(from 1.82 to 2.78) |
| Burkina Faso | female | 105.07(77.68-138.47) | 313.35(238.27-403.09) | 198.23 | 4.92(3.63-6.39) | 6.66(5.11-8.56) | 1.12(from 0.99 to 1.24) |
| Burundi | female | 88.35(58.51-126.31) | 145.46(102.38-200.62) | 64.64 | 6.83(4.61-9.76) | 6.58(4.62-9.01) | -0.27(from -0.35 to -0.2) |
| Cabo Verde | female | 6.4(5.53-7.39) | 28.17(22.65-34.11) | 339.91 | 4.73(4.07-5.45) | 11.3(9.1-13.57) | 2.9(from 2.74 to 3.06) |
| Cambodia | female | 222.39(161.09-290.24) | 972.83(740.2-1214.55) | 337.44 | 8.47(6.41-10.86) | 14.27(10.96-17.53) | 1.81(from 1.74 to 1.87) |
| Cameroon | female | 163.83(128.75-202.6) | 536.55(394.97-734.86) | 227.5 | 7.62(6-9.43) | 9.23(6.91-12.38) | 0.83(from 0.75 to 0.92) |
| Canada | female | 6953.67(6455.72-7366.97) | 15031.24(11836.37-18921.16) | 116.16 | 38.4(35.76-40.63) | 41.01(32.22-51.83) | 0.25(from 0.18 to 0.33) |
| Central African Republic | female | 36.55(25.53-51.16) | 59.74(41.2-82.3) | 63.46 | 5.93(4.22-8.09) | 5.16(3.6-7.06) | -0.35(from -0.41 to -0.28) |
| Chad | female | 64.51(45.74-86.04) | 168.08(127.06-226.8) | 160.56 | 4.57(3.24-6.04) | 6.83(5.21-9.09) | 1.65(from 1.55 to 1.76) |
| Chile | female | 782.8(731.47-827.01) | 3043.27(2388.97-3812.71) | 288.77 | 14.84(13.83-15.7) | 22.9(18-28.73) | 1.77(from 1.67 to 1.86) |
| China | female | 49048.33(40797.24-57119.96) | 217696.17(175106.61-268356.54) | 343.84 | 11.3(9.47-13.12) | 21.1(17-26.04) | 2.5(from 2.27 to 2.73) |
| Colombia | female | 1159.17(1093-1222.62) | 4915.3(3822.98-6254.63) | 324.04 | 13.09(12.24-13.86) | 17.04(13.21-21.71) | 0.78(from 0.71 to 0.86) |
| Comoros | female | 8.08(4.59-11.89) | 22.68(16.03-29.85) | 180.56 | 7.15(4.31-10.37) | 8.68(6.2-11.37) | 0.59(from 0.49 to 0.69) |
| Congo | female | 56.71(34.77-83.88) | 143.88(98.18-207.45) | 153.74 | 9.84(6.31-14.19) | 10.84(7.66-15.15) | 0.45(from 0.31 to 0.59) |
| Cook Islands | female | 0.66(0.5-0.84) | 1.43(1.11-1.81) | 116.99 | 11.12(8.41-14.05) | 11.41(8.92-14.4) | -0.03(from -0.27 to 0.22) |
| Costa Rica | female | 135.31(124.01-145.67) | 716.2(555.31-908.51) | 429.29 | 14.96(13.67-16.11) | 25.8(20.03-32.76) | 2.05(from 1.9 to 2.19) |
| Croatia | female | 1092.47(1006.05-1186.95) | 1823.56(1418.7-2273.66) | 66.92 | 29.25(26.92-31.83) | 36.42(28.27-45.71) | 0.79(from 0.72 to 0.86) |
| Cuba | female | 1317.26(1230.91-1391.21) | 3691.13(3009.73-4457.09) | 180.21 | 25.25(23.65-26.69) | 36.28(29.28-43.91) | 1.17(from 0.96 to 1.39) |
| Cyprus | female | 78.85(66.47-94.86) | 325.22(268.57-385) | 312.43 | 19.2(16.26-23.31) | 31.77(26.25-37.47) | 1.3(from 1.21 to 1.39) |
| Czechia | female | 2943.92(2794.67-3090.65) | 3519.23(2869.12-4274.18) | 19.54 | 35.99(34.21-37.75) | 30.01(24.53-36.44) | 2.3(from 1.95 to 2.65) |
| C么te d'Ivoire | female | 112.04(84.78-146) | 373.32(285.76-484.76) | 233.21 | 6.55(5.04-8.5) | 8(6.34-10.06) | -0.88(from -1.09 to -0.67) |
| Democratic People's Republic of Korea | female | 1230.79(864.6-1683.67) | 2341.87(1660.5-3111.76) | 90.27 | 12.5(9.02-16.78) | 12.65(8.97-16.81) | 0.13(from -0.01 to 0.28) |
| Democratic Republic of the Congo | female | 470.13(359.5-617.28) | 1072.27(697.93-1660.48) | 128.08 | 5.88(4.55-7.84) | 5.67(3.62-9.06) | -0.23(from -0.54 to 0.08) |
| Denmark | female | 1644.66(1546.57-1739.27) | 2554.69(1980.42-3217.97) | 55.33 | 35.55(33.61-37.44) | 41.53(32.05-52.83) | 0.41(from 0.19 to 0.64) |
| Djibouti | female | 5.74(3.92-8.48) | 28.92(20.27-40.42) | 404.25 | 8.47(5.95-12.2) | 10.74(8.03-14.39) | 0.88(from 0.78 to 0.98) |
| Dominica | female | 6.18(5.35-7.1) | 8.61(7.12-10.5) | 39.36 | 14.3(12.29-16.53) | 18.23(15.05-22.45) | 1.18(from 1.01 to 1.34) |
| Dominican Republic | female | 160.54(139.39-183.82) | 721.93(532.16-959.02) | 349.69 | 8.87(7.67-10.09) | 15.11(11.17-20.04) | 2.31(from 2.12 to 2.51) |
| Ecuador | female | 259.09(240.32-277.74) | 1502.17(1199.05-1894.48) | 479.79 | 9.98(9.21-10.72) | 19.45(15.54-24.38) | 2.81(from 2.54 to 3.09) |
| Egypt | female | 840.83(762.97-922.21) | 2485.22(1726-3535.62) | 195.57 | 5.8(5.26-6.33) | 9.05(6.24-12.76) | 1.62(from 1.55 to 1.7) |
| El Salvador | female | 92.09(83.85-100.99) | 451.08(339.86-589.03) | 389.81 | 5.76(5.22-6.33) | 13.02(9.76-17.08) | 2.72(from 2.36 to 3.08) |
| Equatorial Guinea | female | 5.48(3.22-8.55) | 35.92(21.65-57.59) | 555.79 | 5.07(3-7.71) | 13.45(8.33-20.83) | 4.39(from 3.95 to 4.82) |
| Eritrea | female | 32.81(16.87-52.35) | 144.62(102.64-199.83) | 340.81 | 5.63(2.96-8.95) | 9.59(6.94-13.18) | 1.68(from 1.42 to 1.94) |
| Estonia | female | 361.18(337.26-385.23) | 626.46(496.03-788.74) | 73.45 | 27.43(25.65-29.27) | 37.43(29.43-47.01) | 1.3(from 1.07 to 1.53) |
| Eswatini | female | 13.39(10.17-17.42) | 35.3(22.47-51.59) | 163.72 | 8.51(6.5-11.06) | 10.99(7.17-15.63) | 1.03(from 0.75 to 1.31) |
| Ethiopia | female | 659.08(370.48-979.34) | 1442.51(1015.75-2115.72) | 118.87 | 6.52(3.84-9.45) | 7(4.96-10.23) | 0.03(from -0.18 to 0.24) |
| Fiji | female | 16.83(13.22-20.9) | 44.45(34.52-56.34) | 164.18 | 9.46(7.51-11.67) | 11.96(9.43-14.9) | 1.02(from 0.8 to 1.24) |
| Finland | female | 1019.94(952.04-1080.13) | 1771.19(1394.5-2244.45) | 73.66 | 23.09(21.67-24.46) | 26.53(20.72-33.91) | 0.46(from 0.38 to 0.54) |
| France | female | 15022.6(13807.65-16044.99) | 23470.52(17984.39-29796.2) | 56.23 | 29.92(27.84-31.72) | 30.05(23.17-38.54) | -0.06(from -0.18 to 0.06) |
| Gabon | female | 35.56(21.99-57.39) | 66.25(47.54-87.71) | 86.28 | 11.8(7.43-18.81) | 12.24(8.98-15.93) | -0.02(from -0.14 to 0.11) |
| Gambia | female | 7.21(5.37-9.14) | 31.23(21.39-43.94) | 333.05 | 4.51(3.42-5.67) | 6.47(4.43-9.15) | 1.09(from 0.93 to 1.26) |
| Georgia | female | 480.59(435.64-530.59) | 490.37(407.03-585.36) | 2.04 | 13.09(11.86-14.45) | 14.44(11.97-17.38) | 1.24(from 0.72 to 1.76) |
| Germany | female | 30611.87(28694.2-32292.96) | 35855.14(28505.27-45701.84) | 17.13 | 38.06(36.03-40) | 33.15(26.17-42.7) | -1.07(from -1.63 to -0.5) |
| Ghana | female | 189.91(150.1-242.09) | 660.91(523.68-818.99) | 248.01 | 6.09(4.88-7.63) | 7.74(6.24-9.49) | 0.62(from 0.55 to 0.69) |
| Greece | female | 1974.33(1832.47-2102.9) | 3584.83(2830.53-4519.69) | 81.57 | 23.79(22.14-25.3) | 27.31(21.57-34.75) | -0.03(from -0.29 to 0.22) |
| Greenland | female | 6.48(5.46-7.64) | 13.96(11.37-17.17) | 115.47 | 38.58(32.75-45.25) | 44.41(36.54-54.7) | -0.3(from -0.77 to 0.17) |
| Grenada | female | 6.59(5.81-7.41) | 14.39(12.55-16.24) | 118.44 | 15.32(13.57-17.21) | 24.99(21.74-28.19) | 1.74(from 1.47 to 2.01) |
| Guam | female | 5.16(4.22-6.29) | 13.64(11.24-16.4) | 164.55 | 15.13(12.05-18.63) | 14.03(11.55-16.86) | -0.51(from -0.82 to -0.2) |
| Guatemala | female | 101.53(88.16-118.02) | 667.74(525.9-832.82) | 557.67 | 5.91(5.18-6.74) | 11.01(8.77-13.72) | 2.05(from 1.75 to 2.35) |
| Guinea | female | 84.11(66.01-102.99) | 164.41(115.15-217.1) | 95.48 | 5.29(4.09-6.47) | 6.17(4.36-8.1) | 0.54(from 0.49 to 0.58) |
| Guinea-Bissau | female | 12.69(8.84-17.46) | 30.16(22.27-40.18) | 137.57 | 6.15(4.31-8.36) | 7.92(6.05-10.32) | 0.97(from 0.92 to 1.01) |
| Guyana | female | 25.75(21.69-29.85) | 55.4(42.54-70.52) | 115.16 | 13.36(11.31-15.4) | 17.05(13.38-21.37) | 0.74(from 0.54 to 0.94) |
| Haiti | female | 178.94(110.31-238.09) | 440.23(285.45-623.54) | 146.02 | 10.67(6.54-13.94) | 12.21(8.03-17.19) | 0.64(from 0.55 to 0.72) |
| Honduras | female | 64.2(53.5-75.94) | 326.22(230.68-476.75) | 408.13 | 5.86(4.82-7) | 10.4(7.49-15.1) | 1.96(from 1.76 to 2.16) |
| Hungary | female | 2936.68(2779.25-3091.32) | 4164.98(3438.8-5003.63) | 41.83 | 34.03(32.26-35.78) | 37.23(30.52-44.95) | 0.03(from -0.21 to 0.28) |
| Iceland | female | 42.22(37.92-46.53) | 63.99(52.87-75.66) | 51.58 | 27.37(24.65-30.22) | 21.89(18.26-25.9) | -1.18(from -1.56 to -0.8) |
| India | female | 11961.6(9509.14-14673.07) | 49622.66(39204.83-60704.6) | 314.85 | 5.62(4.44-6.96) | 8.69(6.89-10.58) | 1.29(from 1.08 to 1.49) |
| Indonesia | female | 5076.23(3496.46-6528.19) | 18097.81(11296.53-25650.8) | 256.52 | 9.72(6.88-12.33) | 16.53(10.42-23.01) | 1.75(from 1.63 to 1.88) |
| Iran (Islamic Republic of) | female | 893.88(725.24-1132.87) | 3938.74(3588.64-4299.8) | 340.64 | 7.3(5.84-9.28) | 10.97(9.94-12.01) | 1.48(from 1.37 to 1.58) |
| Iraq | female | 286.21(199.82-408.76) | 1075.51(818.69-1384.82) | 275.78 | 7.08(4.96-10) | 8.85(6.87-11.12) | 1.13(from 0.85 to 1.42) |
| Ireland | female | 804.37(749.01-858.5) | 1424.62(1113.14-1793.15) | 77.11 | 36.1(33.74-38.59) | 36.14(28.1-45.67) | 0.02(from -0.08 to 0.12) |
| Israel | female | 776.87(723.11-834.37) | 1860.54(1461.45-2336.89) | 139.49 | 29.93(27.8-32.04) | 29.33(23.02-36.93) | -0.86(from -1.21 to -0.5) |
| Italy | female | 16329.66(15462.32-17068.16) | 26828.7(20696.21-33630.24) | 64.29 | 32.25(30.59-33.67) | 34.42(26.69-43.6) | 0.06(from -0.16 to 0.28) |
| Jamaica | female | 133.37(121.62-144.6) | 366.06(287.03-459.21) | 174.48 | 13.67(12.49-14.84) | 23.4(18.3-29.4) | 1.81(from 1.54 to 2.09) |
| Japan | female | 30770.58(28887.31-31967.7) | 67085.29(51714.41-81583.67) | 118.02 | 32.39(30.38-33.64) | 34.61(27.46-42.1) | 0.12(from 0.05 to 0.2) |
| Jordan | female | 94.13(73.65-121.29) | 467.31(360.2-590.69) | 396.45 | 13.8(10.68-17.72) | 15.43(11.98-19.33) | 0.5(from 0.4 to 0.6) |
| Kazakhstan | female | 1307.4(1224.97-1400.68) | 1722.07(1475.93-1990.47) | 31.72 | 16.73(15.67-17.88) | 16.92(14.55-19.51) | 0.25(from 0.1 to 0.41) |
| Kenya | female | 241.21(155.14-330.55) | 912.9(659.4-1309.2) | 278.47 | 5.74(3.72-7.81) | 7.91(5.78-11.24) | 1.22(from 1.07 to 1.36) |
| Kiribati | female | 1.58(1.22-1.98) | 3.02(2.17-4.04) | 91.34 | 7.89(6.09-10) | 8.37(6.2-10.98) | -0.01(from -0.09 to 0.08) |
| Kuwait | female | 26.51(22.34-30.44) | 120.33(91.94-152.61) | 353.98 | 11.09(9.19-12.81) | 11.46(8.79-14.42) | 1.11(from 0.53 to 1.69) |
| Kyrgyzstan | female | 230.9(211.7-253.24) | 244.98(209.45-284.47) | 6.1 | 12.68(11.64-13.93) | 9.7(8.36-11.16) | -0.93(from -1.18 to -0.69) |
| Lao People's Democratic Republic | female | 111.17(68.15-166.8) | 305.81(209.2-438.55) | 175.09 | 9.92(6.35-14.68) | 13.48(9.35-18.92) | 0.86(from 0.76 to 0.96) |
| Latvia | female | 519.15(488.84-552.72) | 676.95(523.24-868.72) | 30.4 | 22.79(21.44-24.3) | 26.7(20.52-34.79) | 0.66(from 0.44 to 0.88) |
| Lebanon | female | 164.29(129.48-214.18) | 679.75(518.21-941.19) | 313.76 | 14.79(11.73-19.18) | 23.74(18.1-32.93) | 2(from 1.87 to 2.14) |
| Lesotho | female | 28.86(21.33-41.25) | 70.02(44.5-98.86) | 142.64 | 5.39(3.98-7.78) | 10(6.55-13.93) | 2.82(from 2.56 to 3.09) |
| Liberia | female | 28.48(23.23-34.66) | 61.31(39.77-88.3) | 115.29 | 5.81(4.77-6.97) | 6.5(4.19-9.31) | 0.96(from 0.62 to 1.31) |
| Libya | female | 130.53(89.88-194.01) | 421.64(293.69-560.85) | 223.01 | 14.57(10.04-21.55) | 15.97(11.06-21.06) | 0.66(from 0.41 to 0.92) |
| Lithuania | female | 572.73(537.26-610.87) | 818.25(678.37-985.53) | 42.87 | 20.83(19.59-22.21) | 22.59(18.44-27.47) | 0.3(from 0.13 to 0.47) |
| Luxembourg | female | 124.22(113.51-134.67) | 165.79(133.07-202.21) | 33.47 | 38.06(34.83-41.12) | 30.18(24.31-37.02) | -0.89(from -1.21 to -0.58) |
| Madagascar | female | 167.77(120.83-217.35) | 409.22(287.38-577) | 143.91 | 6.4(4.72-8.06) | 7.08(5.17-9.85) | 0.24(from 0.16 to 0.31) |
| Malawi | female | 84.85(67.96-103.08) | 203.86(150.07-264.04) | 140.27 | 4.33(3.48-5.19) | 5.25(3.91-6.71) | 0.87(from 0.78 to 0.97) |
| Malaysia | female | 821.73(706.45-945.03) | 3398.55(2649-4279.37) | 313.59 | 17.99(15.18-20.99) | 26.77(20.91-33.49) | 0.94(from 0.75 to 1.12) |
| Maldives | female | 4.33(2.65-6.16) | 19.25(15.56-23.28) | 344.95 | 12.58(8.78-17.11) | 15.08(12.15-18.28) | 0.26(from 0.04 to 0.47) |
| Mali | female | 104.76(84.5-125.34) | 257.71(191.09-339.66) | 146 | 5.14(4.14-6.11) | 6.35(4.82-8.15) | 0.62(from 0.56 to 0.69) |
| Malta | female | 58.67(52.68-64.79) | 131.39(106.68-158.84) | 123.97 | 24.55(22.09-27.06) | 26.48(21.62-31.93) | 0.19(from -0.02 to 0.4) |
| Marshall Islands | female | 0.88(0.7-1.11) | 2.2(1.53-3.07) | 150.26 | 10.65(8.43-13.52) | 13.56(9.65-18.36) | 0.76(from 0.69 to 0.82) |
| Mauritania | female | 39.14(28.4-49.95) | 88.07(66.29-114.67) | 124.99 | 7.66(5.6-9.75) | 9.08(6.97-11.67) | 0.76(from 0.66 to 0.87) |
| Mauritius | female | 38.1(34.81-41.6) | 156.47(126.13-189.93) | 310.71 | 9.55(8.74-10.46) | 16.62(13.4-20.18) | 1.8(from 1.65 to 1.95) |
| Mexico | female | 1751.44(1678.75-1801.32) | 8043.6(6598.4-9771.21) | 359.26 | 8.11(7.69-8.38) | 12.9(10.6-15.63) | 1.62(from 1.53 to 1.72) |
| Micronesia (Federated States of) | female | 2.62(1.92-3.48) | 5.01(3.36-6.89) | 91.23 | 11.39(8.44-14.85) | 14.27(9.98-19.27) | 0.72(from 0.67 to 0.76) |
| Monaco | female | 15.04(11.28-19) | 23.71(18.04-29.28) | 57.68 | 36.55(27.6-46.29) | 45.97(34.93-57.62) | 0.94(from 0.83 to 1.06) |
| Mongolia | female | 48.2(38.85-59.25) | 115.58(88.12-150.92) | 139.78 | 8.39(6.79-10.34) | 9.21(7.23-11.77) | 0(from -0.12 to 0.13) |
| Montenegro | female | 57.73(46.89-68.01) | 119.84(98.05-143.37) | 107.61 | 16.72(13.65-19.64) | 22.4(18.37-26.8) | 1.44(from 1.31 to 1.56) |
| Morocco | female | 456.54(362.59-557.75) | 1475.34(1121.09-1921.04) | 223.15 | 6.6(5.22-8.04) | 9.33(7.1-11.97) | 1.25(from 1.19 to 1.31) |
| Mozambique | female | 137.84(104.25-174.27) | 422.28(298.63-581.79) | 206.36 | 4.71(3.63-5.87) | 7.38(5.29-10.12) | 1.89(from 1.7 to 2.08) |
| Myanmar | female | 1118.39(821.89-1464.43) | 3323.73(2380.1-4565.36) | 197.19 | 8.86(6.76-11.37) | 12.95(9.42-17.44) | 1.37(from 1.26 to 1.48) |
| Namibia | female | 20.53(15.46-26.69) | 65.88(48.02-89.1) | 220.88 | 5.4(4.08-6.92) | 8.41(6.17-11.2) | 1.67(from 1.58 to 1.76) |
| Nauru | female | 0.35(0.2-0.55) | 0.42(0.25-0.62) | 19.78 | 19.55(11.67-30.18) | 18.94(11.8-26.78) | -0.3(from -0.71 to 0.12) |
| Nepal | female | 179.68(116.22-260.18) | 673.99(465.07-922.98) | 275.1 | 3.9(2.42-5.62) | 6.04(4.17-8.28) | 1.51(from 1.31 to 1.71) |
| Netherlands | female | 4418.95(4076.85-4686.95) | 8655.62(6714.15-10801.81) | 95.87 | 38.18(35.49-40.4) | 47.56(36.95-59.85) | 0.78(from 0.68 to 0.87) |
| New Zealand | female | 1235.03(1144.86-1323.23) | 2035.75(1568.48-2557.75) | 64.83 | 57.48(53.36-61.51) | 48.38(37.18-61) | -0.62(from -0.72 to -0.52) |
| Nicaragua | female | 59.89(48.62-72.33) | 349.52(292.24-411.2) | 483.57 | 7.16(5.62-9) | 15(12.61-17.43) | 2.73(from 2.49 to 2.97) |
| Niger | female | 58.47(40.72-80.32) | 202.6(144.9-284.68) | 246.51 | 4.6(3.16-6.31) | 5.53(4.03-7.55) | 0.63(from 0.57 to 0.7) |
| Nigeria | female | 1285.09(868.95-1875.3) | 3738.18(2591.87-5043.28) | 190.89 | 6.34(4.31-9.14) | 9.15(6.5-11.86) | 1.74(from 1.5 to 1.97) |
| Niue | female | 0.19(0.15-0.23) | 0.21(0.15-0.28) | 13.68 | 14.16(11.25-17.93) | 17.88(13.08-24.16) | 0.82(from 0.72 to 0.92) |
| North Macedonia | female | 161.67(141.91-178.76) | 475.03(370.9-598.33) | 193.83 | 16.62(14.56-18.34) | 28.45(22.33-35.6) | 2.11(from 1.88 to 2.33) |
| Northern Mariana Islands | female | 1.81(1.31-2.45) | 4.4(3.54-5.46) | 142.87 | 24.53(18.14-32.5) | 18.29(14.9-22.41) | -1.44(from -1.6 to -1.27) |
| Norway | female | 1395.97(1297.97-1475.73) | 2312.56(1864.3-2805.84) | 65.66 | 35.99(33.82-37.91) | 45.02(36.3-54.94) | 0.85(from 0.6 to 1.11) |
| Oman | female | 26.24(16.83-36.94) | 93.45(69.35-119.07) | 256.08 | 9.26(6.02-12.83) | 14.39(11.15-17.81) | 1.83(from 1.58 to 2.08) |
| Pakistan | female | 1252.8(1000-1519.14) | 4302.83(3211.34-5659.51) | 243.46 | 4.87(3.85-5.9) | 7.95(6.06-10.36) | 1.62(from 1.42 to 1.81) |
| Palau | female | 1.19(0.88-1.61) | 2.84(2.15-3.62) | 138.41 | 24.73(18.26-33.23) | 28.29(21.58-35.23) | 0.36(from 0.32 to 0.41) |
| Palestine | female | 73.42(50.01-101.38) | 261.81(215.85-310.63) | 256.6 | 15.22(10.42-20.72) | 21.28(17.58-25.37) | 1.31(from 1.01 to 1.61) |
| Panama | female | 87.14(79.33-94.84) | 374.16(290.55-474.28) | 329.37 | 11.72(10.62-12.76) | 17.38(13.54-22.03) | 1.35(from 1.22 to 1.48) |
| Papua New Guinea | female | 54.85(34.2-75.91) | 169.58(117.12-235.15) | 209.17 | 6.23(3.87-8.71) | 7.7(5.34-10.32) | 0.63(from 0.58 to 0.69) |
| Paraguay | female | 85.55(73.73-98.73) | 436.71(332.03-554.91) | 410.46 | 7.37(6.34-8.52) | 15.13(11.51-19.22) | 2.78(from 2.63 to 2.94) |
| Peru | female | 611.66(525.65-706.27) | 3268.43(2448.75-4224.76) | 434.36 | 10.09(8.65-11.71) | 19.58(14.68-25.32) | 2.37(from 2.11 to 2.64) |
| Philippines | female | 2081.8(1793.32-2385.14) | 6371.99(4857.74-8246.14) | 206.08 | 13.56(11.7-15.46) | 15.25(11.72-19.5) | 0.25(from -0.06 to 0.56) |
| Poland | female | 5272.07(5032.98-5460.74) | 10272.92(8130.58-12729.73) | 94.86 | 20.55(19.64-21.31) | 25.54(20.03-31.87) | 0.63(from 0.47 to 0.79) |
| Portugal | female | 2068.83(1933.89-2195.38) | 4047.54(3143.05-5108.56) | 95.64 | 26.68(25.02-28.21) | 31.98(24.76-40.62) | 0.49(from 0.25 to 0.74) |
| Puerto Rico | female | 357.84(328.91-384.02) | 1096.84(861.72-1382.98) | 206.52 | 18.33(16.85-19.64) | 28.47(22.19-36.45) | 1.52(from 1.24 to 1.81) |
| Qatar | female | 7.24(5.41-9.48) | 58.2(43.3-76.18) | 704.16 | 20.4(14.21-26.34) | 34.88(28.01-42.91) | 2.71(from 2.3 to 3.13) |
| Republic of Korea | female | 2371.88(2230.37-2558.82) | 13066.56(10696.52-15721.55) | 450.89 | 13.92(13.01-15.01) | 26.57(21.83-32.02) | 1.7(from 1.37 to 2.03) |
| Republic of Moldova | female | 561.06(527.29-600.7) | 722.97(620.89-830.33) | 28.86 | 21.17(19.9-22.69) | 21.21(18.22-24.48) | 0.86(from 0.32 to 1.4) |
| Romania | female | 2260.96(2145.08-2382.83) | 5381(4436.54-6459.53) | 138 | 14.69(13.95-15.4) | 26.31(21.55-31.83) | 1.86(from 1.71 to 2.01) |
| Russian Federation | female | 25057.36(24147.43-26347.61) | 39961.97(33252.01-47751.19) | 59.48 | 21.54(20.72-22.71) | 27.99(23.08-33.59) | 0.84(from 0.64 to 1.04) |
| Rwanda | female | 125.34(75-176.33) | 288.05(218.8-367.55) | 129.82 | 7.68(4.72-10.76) | 8.48(6.54-10.45) | 0.19(from -0.03 to 0.41) |
| Saint Kitts and Nevis | female | 4.92(4.35-5.53) | 7.71(6.24-9.5) | 56.6 | 23.4(20.77-26.15) | 23.93(19.62-29.14) | 0.59(from 0.4 to 0.78) |
| Saint Lucia | female | 6.78(6.15-7.47) | 17.8(14.83-21.32) | 162.48 | 13.99(12.73-15.38) | 15.64(13.04-18.79) | -0.09(from -0.37 to 0.18) |
| Saint Vincent and the Grenadines | female | 5.84(5.3-6.42) | 12.04(10.32-14.02) | 106.22 | 14.56(13.22-15.98) | 18.52(15.82-21.54) | 0.82(from 0.6 to 1.04) |
| Samoa | female | 5.44(4.3-7) | 10.52(7.86-13.58) | 93.44 | 12.23(9.8-15.7) | 14.22(10.71-18.26) | 0.4(from 0.35 to 0.45) |
| San Marino | female | 6.54(5.49-7.66) | 13.12(9.96-17.99) | 100.58 | 35.24(29.66-41.28) | 37.43(28.39-51.9) | 0.43(from 0.31 to 0.56) |
| Sao Tome and Principe | female | 1.8(1.45-2.15) | 4.57(3.17-6.32) | 154.12 | 5.57(4.54-6.65) | 8.68(6.08-11.96) | 1.44(from 1.36 to 1.52) |
| Saudi Arabia | female | 152.66(104.57-218) | 1056.78(784.5-1369.04) | 592.22 | 6.36(4.35-9.05) | 13.13(10.19-16.6) | 2.74(from 2.48 to 2.99) |
| Senegal | female | 92.87(70.35-115.54) | 292.21(222.55-375.99) | 214.66 | 6.07(4.68-7.44) | 7.96(6.23-10.16) | 1.13(from 0.95 to 1.31) |
| Serbia | female | 1264.93(994.88-1483.86) | 2329.84(1859.15-2920.9) | 84.19 | 21.43(16.62-25.31) | 27.99(22.16-35.2) | 1.01(from 0.87 to 1.16) |
| Seychelles | female | 5.49(4.85-6.21) | 17.14(14.31-20.24) | 212.4 | 17.1(15.11-19.3) | 30.29(25.24-35.8) | 1.81(from 1.59 to 2.03) |
| Sierra Leone | female | 43(32.43-54.52) | 116.67(88.37-152.67) | 171.33 | 4.8(3.67-6.03) | 6.78(5.17-8.8) | 1.5(from 1.37 to 1.63) |
| Singapore | female | 421.12(390.98-452.18) | 1346.97(1081.73-1673.33) | 219.85 | 35.91(33.25-38.62) | 33.56(26.93-41.67) | -0.4(from -0.56 to -0.23) |
| Slovakia | female | 981.28(912.08-1055.1) | 2192.46(1716.87-2752.06) | 123.43 | 28.55(26.61-30.62) | 41.45(32.39-52.28) | 1.23(from 1.06 to 1.4) |
| Slovenia | female | 400.19(308.57-513.45) | 671.3(514.59-857.77) | 67.75 | 27.25(21.04-35.24) | 28.57(21.78-36.94) | 0.08(from -0.19 to 0.35) |
| Solomon Islands | female | 5.88(3.17-9.77) | 18.83(10.68-27.4) | 220.26 | 8.83(4.96-14.54) | 11.69(7.23-16.3) | 0.79(from 0.63 to 0.96) |
| Somalia | female | 60.1(37.88-87.28) | 163.14(95.69-296.62) | 171.44 | 4.41(2.78-6.3) | 4.38(2.56-8) | 0.27(from 0.14 to 0.41) |
| South Africa | female | 1149.28(953.43-1389.61) | 2642.52(2270.44-3059.74) | 129.93 | 9.77(7.98-12.04) | 10.53(9.07-12.14) | 0.34(from 0.17 to 0.51) |
| South Sudan | female | 96.84(51.15-177.32) | 162.1(97.01-258.55) | 67.39 | 9.19(4.89-16.64) | 9.03(5.53-13.99) | 0.05(from -0.06 to 0.17) |
| Spain | female | 9114.75(8453.73-9658.65) | 19642.43(15161.44-24960.62) | 115.5 | 29.59(27.6-31.23) | 36.8(28.64-47.34) | 0.69(from 0.62 to 0.77) |
| Sri Lanka | female | 282.19(246.02-320.93) | 1344.53(1013.06-1767.48) | 376.46 | 5.39(4.72-6.12) | 9.69(7.36-12.67) | 2.27(from 2.18 to 2.36) |
| Sudan | female | 226.78(170.14-294.86) | 646.79(461.7-897.6) | 185.2 | 5.02(3.81-6.56) | 7.18(5.33-9.71) | 1.35(from 1.26 to 1.44) |
| Suriname | female | 17.82(15.76-19.8) | 58.53(47.9-70.5) | 228.39 | 13.25(11.71-14.78) | 18.29(14.95-21.98) | 1.17(from 0.97 to 1.36) |
| Sweden | female | 2541.38(2335.95-2710.82) | 3622.38(2929.17-4381.35) | 42.54 | 30.2(28-32.08) | 32.74(26.59-39.81) | 0.21(from 0.02 to 0.41) |
| Switzerland | female | 1601.88(1471.42-1723.86) | 2826.42(2163.31-3615.08) | 76.44 | 25.99(24.11-27.96) | 29.59(22.8-37.82) | 0.18(from -0.12 to 0.47) |
| Syrian Arab Republic | female | 154.74(116-199.36) | 416.31(291.75-565.93) | 169.04 | 6.03(4.48-7.74) | 7.57(5.38-10.04) | 0.73(from 0.49 to 0.96) |
| Taiwan (Province of China) | female | 1621.74(1539.26-1706.19) | 9434.13(7394.73-12153.61) | 481.73 | 21.2(20.09-22.33) | 45.5(35.59-58.73) | 2.57(from 2.26 to 2.89) |
| Tajikistan | female | 147.68(131.95-166) | 238.14(188.85-299.56) | 61.25 | 9.12(8.11-10.25) | 10.08(8.01-12.46) | 0.93(from 0.45 to 1.4) |
| Thailand | female | 2021.87(1743.77-2320.79) | 7710.55(5691.76-10048.15) | 281.36 | 10.72(9.26-12.32) | 13.99(10.32-18.23) | 0.55(from 0.26 to 0.83) |
| Timor-Leste | female | 12.35(8.54-18.31) | 54.94(37.04-72.79) | 344.77 | 8.6(6.22-12.29) | 13.68(9.13-17.98) | 1.96(from 1.71 to 2.21) |
| Togo | female | 38.73(31.46-47.38) | 135.13(93.38-184.13) | 248.95 | 6.14(5.01-7.38) | 7.04(5-9.49) | 0.51(from 0.39 to 0.64) |
| Tokelau | female | 0.09(0.07-0.12) | 0.1(0.07-0.14) | 15.19 | 12.52(9.5-16.43) | 16(11.29-22.2) | 0.85(from 0.79 to 0.92) |
| Tonga | female | 2.07(1.66-2.5) | 3.75(2.86-4.9) | 81.32 | 7.46(6.02-9.01) | 8.71(6.63-11.42) | 0.41(from 0.3 to 0.52) |
| Trinidad and Tobago | female | 80.71(74.64-87.11) | 177.92(136.08-231.64) | 120.44 | 18.45(17.02-19.86) | 18.51(14.1-24.12) | -0.14(from -0.28 to -0.01) |
| Tunisia | female | 219.82(173.01-269.78) | 808.53(596.71-1090.51) | 267.82 | 9.41(7.39-11.64) | 12.68(9.34-16.98) | 0.97(from 0.91 to 1.03) |
| Turkey | female | 2354.71(1826.67-2991.19) | 6668.61(5297.89-8276.77) | 183.2 | 12.57(9.68-15.91) | 14.45(11.5-17.9) | 0.71(from 0.24 to 1.18) |
| Turkmenistan | female | 90.94(84.54-97.36) | 172.71(137.43-216.44) | 89.92 | 7.84(7.29-8.41) | 8.21(6.6-10.24) | -0.17(from -0.61 to 0.27) |
| Tuvalu | female | 0.4(0.31-0.51) | 0.66(0.47-0.9) | 65.05 | 10.63(8.26-13.43) | 12.69(9.08-17.02) | 0.42(from 0.34 to 0.5) |
| Uganda | female | 169.65(125.4-211.27) | 792.32(609.83-984.47) | 367.02 | 5.24(4.01-6.42) | 10.12(7.9-12.35) | 2.36(from 2.08 to 2.64) |
| Ukraine | female | 12136.3(11482.19-12846.28) | 11403.83(9049.29-14043.19) | -6.04 | 26.74(25.37-28.27) | 24.96(19.72-30.84) | -0.73(from -0.96 to -0.5) |
| United Arab Emirates | female | 27.25(17.7-38.07) | 191.29(121.77-270.2) | 602.11 | 19.31(12.02-27.2) | 17.76(9.94-28.72) | -0.13(from -0.73 to 0.49) |
| United Kingdom | female | 19381.84(18386.85-20001.32) | 24510.67(19834.17-30054.23) | 26.46 | 36.41(34.87-37.49) | 36.18(28.97-44.65) | -0.13(from -0.22 to -0.04) |
| United Republic of Tanzania | female | 395.56(313.24-479.34) | 1205.46(967.3-1487.09) | 204.75 | 7.19(5.77-8.67) | 9.4(7.62-11.46) | 1.08(from 0.91 to 1.25) |
| United States of America | female | 75759.27(71329.11-78614.04) | 104631.86(86250.82-125571.06) | 38.11 | 40.31(38.34-41.67) | 35.22(28.85-42.42) | -0.72(from -0.84 to -0.61) |
| United States Virgin Islands | female | 11.21(9.41-13.17) | 33.33(26.57-40.53) | 197.24 | 25.61(21.54-29.96) | 32.3(25.91-39.25) | 0.88(from 0.65 to 1.1) |
| Uruguay | female | 699.89(650.54-746.46) | 1091.13(869.18-1349.82) | 55.9 | 31.45(29.27-33.48) | 33.42(26.49-42.02) | 0.11(from 0.01 to 0.21) |
| Uzbekistan | female | 536.77(496.7-573.78) | 1170.56(987.69-1395.92) | 118.08 | 7.97(7.38-8.51) | 11.87(10.27-13.77) | 1.44(from 1.3 to 1.57) |
| Vanuatu | female | 2.12(1.45-2.93) | 7.5(5.27-10) | 253.3 | 7.46(5.2-10.19) | 9.39(6.69-12.36) | 0.52(from 0.32 to 0.73) |
| Venezuela (Bolivarian Republic of) | female | 573.69(540.96-608.95) | 2645.15(1980.07-3505.67) | 361.08 | 11.19(10.46-11.87) | 17.25(12.88-22.85) | 1.25(from 1.08 to 1.43) |
| Viet Nam | female | 1820.1(1442.57-2233.24) | 9424.93(7070.64-11951.97) | 417.82 | 7.85(6.27-9.59) | 17.91(13.49-22.52) | 3.24(from 3.1 to 3.38) |
| Yemen | female | 138.9(89.31-207.66) | 472.61(349.36-638.37) | 240.25 | 5.49(3.54-8.08) | 6.88(5.12-9.37) | 1.15(from 1.01 to 1.28) |
| Zambia | female | 136.11(86.02-193.88) | 414.83(293.3-572.38) | 204.78 | 9.7(6.34-13.66) | 11.64(8.35-15.82) | 0.65(from 0.46 to 0.83) |
| Zimbabwe | female | 205.44(172.84-245.21) | 539.19(388.02-717.91) | 162.46 | 10.22(8.61-12.15) | 13.82(10.03-18.34) | 1.36(from 1 to 1.72) |
| Afghanistan | male | 276.37(156.45-520.39) | 520.08(351.44-921.22) | 88.18 | 7.2(6.18-8.41) | 8.41(5.95-14.57) | 0.62(from 0.4 to 0.84) |
| Albania | male | 121.85(110.97-133.45) | 338.75(244.58-456.82) | 178 | 6.72(5.04-8.33) | 17.22(12.58-23.1) | 1.51(from 1.12 to 1.9) |
| Algeria | male | 464.24(359.02-584.51) | 1925.3(1435.2-2503.23) | 314.72 | 10.52(9.84-11.26) | 11.52(8.68-14.83) | 1.17(from 1.12 to 1.21) |
| American Samoa | male | 2.45(1.91-2.96) | 5.49(4.49-6.55) | 124.37 | 10.91(9.32-12.62) | 24.38(20.37-28.79) | 0.6(from 0.52 to 0.68) |
| Andorra | male | 22.1(16.92-29.47) | 58.99(45.67-73.83) | 166.95 | 5.01(3.5-7.19) | 85.17(66.07-106.47) | 0.13(from -0.01 to 0.27) |
| Angola | male | 175.6(114.66-258.55) | 586.67(430.67-756.17) | 234.1 | 18.57(11.89-28.77) | 12.09(9.05-15.26) | 1.01(from 0.76 to 1.25) |
| Antigua and Barbuda | male | 3.87(3.48-4.28) | 9.68(8.11-11.44) | 150.07 | 10.39(9.74-10.98) | 21.28(17.9-24.97) | 0.92(from 0.59 to 1.25) |
| Argentina | male | 4382.5(4170.88-4598.8) | 10280.56(8160-12911.7) | 134.58 | 9.73(6.53-14.5) | 43.95(34.86-55.2) | 1.02(from 0.84 to 1.19) |
| Armenia | male | 232.35(217.15-248.74) | 404.52(334.67-478.09) | 74.1 | 16.35(14.17-19.17) | 23.16(19.17-27.33) | 0.58(from 0.36 to 0.81) |
| Australia | male | 5100.46(4871.66-5326.67) | 10608.19(8165.04-13649.48) | 107.99 | 7.89(6.5-9.4) | 55.17(42.76-70.63) | -0.54(from -0.7 to -0.37) |
| Austria | male | 2908.06(2747.54-3075.04) | 3375.95(2738.21-4122.84) | 16.09 | 19.35(12.5-28.47) | 43.04(34.93-52.54) | -2.02(from -2.22 to -1.82) |
| Azerbaijan | male | 363.86(328.09-401.21) | 844.45(649.74-1122.41) | 132.08 | 5.73(4.26-7.16) | 19.21(14.8-25.12) | 1.16(from 0.55 to 1.77) |
| Bahamas | male | 19.11(17.06-21.38) | 59.24(47.52-72.99) | 209.98 | 54.47(51.46-57.54) | 33.93(27.3-41.52) | 0.96(from 0.83 to 1.08) |
| Bahrain | male | 15.65(12.65-18.86) | 116.12(84.64-154.25) | 641.88 | 24.94(23.23-26.56) | 19.93(15.33-25.67) | 0.3(from -0.01 to 0.61) |
| Bangladesh | male | 1272.03(889.76-1833.32) | 3816.07(2648.61-5706.69) | 200 | 14.23(13.22-15.26) | 5.77(4.03-8.62) | 0.36(from 0.19 to 0.54) |
| Barbados | male | 31.43(28.26-34.55) | 91.74(74.99-110.79) | 191.87 | 57.5(55.71-58.96) | 41.85(34.32-50.43) | 1.21(from 0.94 to 1.48) |
| Belarus | male | 1500.93(1429.73-1585.02) | 2695.44(2108.27-3470.13) | 79.58 | 47.59(45.35-49.62) | 45.55(36.1-57.92) | 0.66(from 0.39 to 0.93) |
| Belgium | male | 3143.32(2975.79-3324.86) | 4918.73(3828.97-6327.27) | 56.48 | 5.94(4.25-8.48) | 48.54(37.64-62.33) | -0.24(from -0.33 to -0.15) |
| Belize | male | 3.57(3.14-4) | 22.73(19.39-26.55) | 536.87 | 5.57(4.72-6.9) | 16.06(13.69-18.78) | 2.12(from 1.56 to 2.69) |
| Benin | male | 72.63(59.72-89.53) | 190.39(142.31-256.82) | 162.13 | 4.36(2.35-7.03) | 8.82(6.69-11.63) | 0.54(from 0.48 to 0.59) |
| Bermuda | male | 12.63(11.32-13.92) | 30.86(25.54-37.14) | 144.27 | 12.67(11.45-13.95) | 54.47(45.29-65.54) | 0.95(from 0.76 to 1.13) |
| Bhutan | male | 5.03(2.58-8.25) | 21.63(12.01-32.19) | 330.22 | 7.66(6.29-9.42) | 7.81(4.47-11.53) | 2.19(from 2.09 to 2.28) |
| Bolivia (Plurinational State of) | male | 127.64(86.13-167.66) | 640.03(421.41-871.42) | 401.45 | 5.49(5-6.03) | 15.7(10.23-21.3) | 1.91(from 1.79 to 2.02) |
| Bosnia and Herzegovina | male | 351.42(325.9-379.86) | 1200.48(940.22-1522.02) | 241.61 | 9.96(9.43-10.5) | 45.97(36.3-58.01) | 3.58(from 3.12 to 4.04) |
| Botswana | male | 31.64(23.53-41.66) | 130.5(93.7-167.55) | 312.43 | 8.43(5.81-11.15) | 22.57(16.7-28.31) | 1.35(from 0.88 to 1.82) |
| Brazil | male | 5032.08(4858.98-5203.52) | 21140.61(19651.4-22456.28) | 320.12 | 6.2(4.11-9.02) | 19.93(18.5-21.18) | 1.79(from 1.58 to 2) |
| Brunei Darussalam | male | 22.67(17.74-27.93) | 80.51(65.42-97.84) | 255.19 | 15.65(14.07-17.26) | 67.51(55.87-81.1) | 1.57(from 1.15 to 1.99) |
| Bulgaria | male | 1937.63(1796.01-2089.04) | 3564.54(2821.28-4411.57) | 83.96 | 14.38(13.1-15.62) | 58.08(45.96-71.82) | 3.32(from 2.82 to 3.82) |
| Burkina Faso | male | 132.15(103.06-173.05) | 327.5(247.98-445.35) | 147.82 | 4.82(4.16-5.54) | 8.32(6.43-11.21) | 0.75(from 0.57 to 0.93) |
| Burundi | male | 99.08(79.46-124.43) | 189.31(127.5-297.74) | 91.06 | 9.54(6.98-11.9) | 8.1(5.59-12.49) | -0.64(from -0.74 to -0.54) |
| Cabo Verde | male | 4.74(4.09-5.42) | 28.14(20.04-34.23) | 493.73 | 28.03(25.03-31.21) | 16.1(11.04-19.62) | -0.35(from -0.51 to -0.19) |
| Cambodia | male | 206.44(153.85-329.76) | 1009.96(779.08-1245.56) | 389.22 | 16.21(12.42-21.75) | 20.11(15.64-24.25) | 3.2(from 2.7 to 3.7) |
| Cameroon | male | 220.63(168.51-279.05) | 730.24(509.86-1026.59) | 230.98 | 7.68(7.41-7.89) | 13.25(9.49-18.19) | 2.39(from 2.3 to 2.49) |
| Canada | male | 7763.93(7333.34-8197.66) | 18601.86(14353.51-23738.3) | 139.59 | 6.64(4.23-9.51) | 59.25(45.71-75.6) | 0.73(from 0.68 to 0.78) |
| Central African Republic | male | 48.68(34.51-69.93) | 77.91(52.92-124.8) | 60.04 | 19.51(18.32-20.82) | 7.8(5.64-12.15) | 0.28(from 0.17 to 0.39) |
| Chad | male | 79.01(57.79-103.18) | 223.04(163.22-302.36) | 182.31 | 8.78(7.06-11.56) | 7.68(5.66-10.23) | -0.39(from -0.46 to -0.32) |
| Chile | male | 719.06(676.95-761.33) | 2962.33(2314.27-3781.93) | 311.97 | 6.24(4.26-11.14) | 27.67(21.67-35.2) | 0.97(from 0.9 to 1.05) |
| China | male | 56862.66(47480.28-66806.87) | 390203.88(310197.47-484107.86) | 586.22 | 55.76(47.85-64.79) | 41.43(33.41-50.87) | 2.26(from 2.1 to 2.41) |
| Colombia | male | 886.8(835.92-934.58) | 4130.45(3112.38-5355.88) | 365.77 | 64.83(61.33-68.39) | 17.26(13.02-22.36) | 4.46(from 4.13 to 4.8) |
| Comoros | male | 8.64(4.85-11.75) | 20.13(13.96-28.28) | 133.05 | 8.4(6.81-9.92) | 9.35(6.62-12.9) | 1.72(from 1.53 to 1.9) |
| Congo | male | 67.05(44.51-90.89) | 158.75(113.61-215.65) | 136.78 | 19.93(18.51-21.54) | 13.26(9.8-17.47) | 0.24(from 0.09 to 0.39) |
| Cook Islands | male | 0.7(0.57-0.83) | 1.58(1.32-1.92) | 125.21 | 5.87(4.26-7.68) | 13.46(11.15-16.31) | -0.45(from -0.72 to -0.18) |
| Costa Rica | male | 120.76(112.47-129.28) | 779.54(602.53-997.03) | 545.53 | 43.73(41.79-45.92) | 33.07(25.63-42.13) | 0.62(from 0.44 to 0.79) |
| Croatia | male | 1112.03(1022.43-1205.92) | 2585.46(2014.5-3257.15) | 132.5 | 3.34(2.1-5.45) | 69.64(54.5-87.31) | 3.17(from 3 to 3.34) |
| Cuba | male | 1083.12(1019.54-1143.72) | 2878.37(2323.47-3570.49) | 165.75 | 9.59(6.17-13.63) | 32.55(26.25-40.35) | 1.88(from 1.68 to 2.09) |
| Cyprus | male | 81.2(68.06-96.28) | 413.81(337.07-499.33) | 409.6 | 31.32(29.81-33.03) | 45.28(36.9-54.78) | 1.39(from 1.17 to 1.6) |
| Czechia | male | 3779.51(3613.4-3949.67) | 5320.09(4313.85-6526.51) | 40.76 | 54.3(41.16-67.13) | 57.56(46.78-70.58) | 3.04(from 2.59 to 3.49) |
| C么te d'Ivoire | male | 224.39(167.9-296.41) | 572.72(427.79-735.07) | 155.24 | 15.84(14.32-17.4) | 11.04(8.48-13.8) | -0.73(from -1.01 to -0.45) |
| Democratic People's Republic of Korea | male | 1098.38(794.09-1536.21) | 2644.31(1872.14-3765.78) | 140.75 | 14.77(11.79-17.89) | 19.16(14-26.85) | 0.72(from 0.59 to 0.86) |
| Democratic Republic of the Congo | male | 539.35(391.56-880.8) | 1122.11(701.3-2167.8) | 108.05 | 28.29(27.03-29.58) | 7.32(4.61-14.36) | -0.38(from -0.7 to -0.05) |
| Denmark | male | 1514.98(1446.2-1592.26) | 3022.09(2361.36-3849.99) | 99.48 | 10.86(8.5-13.6) | 56.41(44.04-71.53) | 0.67(from 0.4 to 0.94) |
| Djibouti | male | 6.66(4.12-9.67) | 40.63(27.45-58.04) | 510.37 | 8.89(6.83-11.07) | 13(9.24-17.83) | 1.07(from 1 to 1.15) |
| Dominica | male | 4.96(4.26-5.73) | 9.25(7.39-11.58) | 86.56 | 33.43(31.1-35.84) | 21.39(17.1-26.74) | 0.92(from 0.83 to 1.01) |
| Dominican Republic | male | 145.05(124.65-167.42) | 857.19(568-1171.25) | 490.95 | 52.37(49.92-54.7) | 19.06(12.76-25.81) | 3.71(from 3.53 to 3.9) |
| Ecuador | male | 199.63(185.57-214.59) | 1348.06(1042.94-1728.38) | 575.27 | 6.37(4.67-8.36) | 18.92(14.68-24.1) | 3.62(from 3.31 to 3.92) |
| Egypt | male | 963(852.64-1081.81) | 4035.19(2803.08-5651.79) | 319.02 | 37.26(35.01-39.66) | 10.72(7.53-14.92) | 1.86(from 1.71 to 2) |
| El Salvador | male | 78(71.59-85.13) | 393.3(292.19-514.04) | 404.2 | 12.96(10.21-16.13) | 15.56(11.53-20.33) | 3.38(from 2.92 to 3.84) |
| Equatorial Guinea | male | 6.97(4.72-10.54) | 36.85(19.86-53.05) | 428.57 | 7.19(5.55-8.92) | 18.71(10.48-26.55) | 3.62(from 3.4 to 3.84) |
| Eritrea | male | 33.91(22.98-45.6) | 134.41(93.67-176.54) | 296.4 | 10.85(8.19-14.22) | 11.47(8.12-14.67) | 0.97(from 0.66 to 1.27) |
| Estonia | male | 272.63(255.92-290.97) | 491.05(381.32-623.97) | 80.11 | 8.9(6.75-12.67) | 50.58(39.45-63.87) | 1.46(from 1.15 to 1.77) |
| Eswatini | male | 15.48(11.12-21.27) | 44.9(28.04-64.89) | 190.11 | 26.95(25.12-28.76) | 19.51(12.34-27.53) | 1.47(from 1.13 to 1.82) |
| Ethiopia | male | 841.23(559.92-1697.21) | 1756.32(1227.04-2688.42) | 108.78 | 21.26(16.75-25.35) | 8.36(5.88-12.74) | 0.1(from -0.25 to 0.45) |
| Fiji | male | 19.77(15.88-24.45) | 50.96(39.08-64.97) | 157.72 | 12.96(9.87-16.79) | 15.73(12.59-19.43) | 1.25(from 1.08 to 1.42) |
| Finland | male | 847.76(803.45-892.17) | 2028.17(1573.99-2563.86) | 139.24 | 7.88(5.14-10.2) | 37.51(29.12-47.45) | 0.68(from 0.63 to 0.74) |
| France | male | 17279.45(16309.35-18216.94) | 28806.34(22411.85-36758.29) | 66.71 | 5.82(5.08-6.57) | 48.91(38.04-62.93) | -0.25(from -0.35 to -0.16) |
| Gabon | male | 45.02(28.17-71.22) | 99.77(67.24-128.21) | 121.6 | 4.59(3.14-5.82) | 21.37(14.77-26.63) | 0.36(from 0.27 to 0.44) |
| Gambia | male | 8.79(6.59-11.58) | 32.59(22.21-45.51) | 270.62 | 44.12(40.75-47.58) | 7.2(4.96-9.94) | 1.15(from 0.99 to 1.31) |
| Georgia | male | 490.1(438.42-544.64) | 605.91(500.73-720.14) | 23.63 | 11.13(8.84-13.58) | 25.43(20.99-30.26) | 1.83(from 1.28 to 2.37) |
| Germany | male | 25114.49(23968.29-26221.88) | 43096.22(33713.73-56085.67) | 71.6 | 37.15(34.96-39.49) | 50.96(39.6-66.22) | -0.55(from -1.03 to -0.07) |
| Ghana | male | 198.23(154.17-247.82) | 833.72(580.67-1114.31) | 320.58 | 12.52(11.23-14.05) | 11.72(8.23-15.46) | 2.14(from 2.05 to 2.23) |
| Greece | male | 1868.58(1743.87-1995.3) | 4317.71(3406.78-5442.77) | 131.07 | 4.98(4.2-5.88) | 40.18(31.34-51.2) | 1.04(from 0.81 to 1.27) |
| Greenland | male | 6.27(5.42-7.4) | 17.94(14.62-21.46) | 186.25 | 14.16(12.03-16.43) | 49.98(41.31-58.56) | 1.05(from 0.88 to 1.21) |
| Grenada | male | 6.11(5.41-6.85) | 15.83(14.06-17.87) | 158.94 | 5.99(4.75-7.23) | 30.81(27.58-34.44) | 1.49(from 1.07 to 1.91) |
| Guam | male | 10.81(8.94-13.02) | 26.05(21.3-31.69) | 140.97 | 9.06(5.86-12.95) | 28.45(23.53-34.49) | 0.06(from -0.27 to 0.39) |
| Guatemala | male | 90.33(75.33-107.37) | 622.26(487.29-788.43) | 588.91 | 31.02(29.44-32.6) | 12.09(9.58-15.28) | 3.17(from 2.75 to 3.6) |
| Guinea | male | 94.62(76.5-113.07) | 226.06(166.52-307.38) | 138.91 | 10.53(9.87-11.17) | 8.38(6.25-11.31) | 1.36(from 1.27 to 1.44) |
| Guinea-Bissau | male | 21.95(14.15-29.34) | 35.24(24.35-46.84) | 60.51 | 9.29(7.24-11.45) | 10.99(7.84-14.51) | -0.07(from -0.12 to -0.03) |
| Guyana | male | 28.84(24.33-33.76) | 60.21(46.35-77.46) | 108.75 | 11.16(9.06-13.68) | 20.52(16.14-26.13) | 0.77(from 0.58 to 0.96) |
| Haiti | male | 148.68(99.12-207.87) | 338.49(220.24-482.74) | 127.67 | 17.05(12.79-21.96) | 10.6(7.05-15.03) | 0.49(from 0.34 to 0.65) |
| Honduras | male | 47.78(33.35-60.29) | 247.81(138.78-367.84) | 418.66 | 14.35(12.85-15.99) | 8.85(4.87-13.12) | 2.5(from 2.32 to 2.68) |
| Hungary | male | 3220.74(3058.74-3393.67) | 5707.59(4634.27-6930.39) | 77.21 | 8.91(6.92-11.12) | 73.61(60.08-88.94) | 0.89(from 0.64 to 1.14) |
| Iceland | male | 42.44(38.27-47) | 105.16(91.18-120.94) | 147.79 | 19.4(17.47-21.42) | 40.28(34.85-46.23) | 0.71(from 0.45 to 0.97) |
| India | male | 12358.86(10499.6-15391.06) | 45488.89(36121.89-55181.64) | 268.07 | 16.97(15.29-18.73) | 8.48(6.78-10.22) | 1.34(from 1.23 to 1.45) |
| Indonesia | male | 4432.75(3548.33-5289.08) | 21011.78(14208.8-28017.59) | 374.01 | 8.21(6.64-10.09) | 20.73(13.85-27.43) | 2.81(from 2.74 to 2.88) |
| Iran (Islamic Republic of) | male | 1268.26(987.58-1577.87) | 6243.86(5678.03-6845.34) | 392.32 | 30.26(28.72-31.9) | 16.83(15.3-18.48) | 2.15(from 1.96 to 2.34) |
| Iraq | male | 345.48(221.83-497.83) | 1571.31(1184.67-2000.47) | 354.81 | 8.07(5.3-15.93) | 13.53(10.4-16.87) | 1.6(from 1.33 to 1.87) |
| Ireland | male | 974.8(911.39-1035.25) | 2006.82(1546.1-2548.79) | 105.87 | 8.99(6.88-12.52) | 57.03(43.92-72.26) | 0.14(from 0.02 to 0.26) |
| Israel | male | 760.78(705.37-809.42) | 2032.65(1563.49-2565.42) | 167.18 | 23.87(22.43-25.4) | 38.8(29.87-48.99) | -0.4(from -0.76 to -0.03) |
| Italy | male | 17617.41(16821.04-18417.42) | 33685.7(26005.24-42506.58) | 91.21 | 9.29(6.04-13.3) | 54.6(42.08-69) | 0.4(from 0.09 to 0.7) |
| Jamaica | male | 119.27(109.18-129.79) | 406.42(313.4-511.43) | 240.75 | 11.39(9.38-13.74) | 28.58(22.1-36.04) | 2.73(from 2.26 to 3.2) |
| Japan | male | 40413.25(39074.47-41576.83) | 93125.62(75245.11-114126.56) | 130.43 | 67.69(64.75-70.61) | 62.44(50.33-76.8) | 0.25(from 0.14 to 0.36) |
| Jordan | male | 97.74(75.07-124.92) | 790.59(594.11-1017.29) | 708.84 | 51.15(48.04-54.56) | 22.51(17.28-28.86) | 1.88(from 1.64 to 2.12) |
| Kazakhstan | male | 1158.39(1089.54-1233.78) | 1656.03(1427.14-1920.41) | 42.96 | 7.94(5.95-11.86) | 24.54(21.33-28.37) | 0.49(from 0.27 to 0.71) |
| Kenya | male | 186.6(114.42-255.07) | 870.66(682.44-1116.11) | 366.58 | 14.47(11.17-18.36) | 8.67(6.93-10.87) | 2.33(from 2.1 to 2.56) |
| Kiribati | male | 2.72(2.14-3.37) | 4.82(3.52-6.66) | 77.13 | 50.33(47.64-53.08) | 15.59(11.66-21.2) | -0.11(from -0.17 to -0.04) |
| Kuwait | male | 37.49(32.38-41.9) | 334.07(259.88-416.49) | 791.14 | 8.77(5.88-11.35) | 22.1(17.36-27.51) | 3.73(from 3.29 to 4.17) |
| Kyrgyzstan | male | 199.27(185.38-214) | 227.35(196.39-265.02) | 14.1 | 9.36(7.54-11.64) | 11.48(9.98-13.25) | -1.38(from -1.7 to -1.06) |
| Lao People's Democratic Republic | male | 111.18(73.38-174.29) | 350.05(241.82-466.19) | 214.84 | 14.29(10.14-18.98) | 16.44(11.42-21.44) | 1.27(from 1.21 to 1.34) |
| Latvia | male | 386.01(365.8-408.21) | 537.04(422.13-681.4) | 39.13 | 5.85(3.38-9.58) | 37.47(29.59-47.52) | 0.89(from 0.55 to 1.22) |
| Lebanon | male | 172.33(122.14-226.87) | 875.02(676.36-1122.2) | 407.74 | 9.68(6.96-15.98) | 37.2(28.81-47.74) | 3.82(from 3.49 to 4.15) |
| Lesotho | male | 31.66(23.43-47.61) | 75.58(54.16-104.31) | 138.69 | 22.1(20.59-24.39) | 14.81(10.85-20.01) | 2.33(from 2.19 to 2.47) |
| Liberia | male | 43.02(34.35-54.94) | 70.68(43.82-109.41) | 64.3 | 28.1(22.33-34.39) | 7.16(4.49-11.31) | 0.37(from -0.01 to 0.74) |
| Libya | male | 136.01(76.43-197.94) | 478.97(328.55-649.45) | 252.15 | 32.96(29.94-36.29) | 18.01(12.46-24.38) | 1.21(from 0.99 to 1.43) |
| Lithuania | male | 534.2(505.85-563.5) | 850.63(691.46-1040.83) | 59.23 | 15.5(13.78-17.22) | 40.57(33.01-49.55) | 1.12(from 0.87 to 1.38) |
| Luxembourg | male | 121.08(111.26-131.99) | 206.57(168.68-252.52) | 70.6 | 4.87(3.8-6.27) | 45.32(37.06-55.31) | -0.84(from -1.21 to -0.48) |
| Madagascar | male | 184.3(144.62-225.7) | 392.29(263.4-559.82) | 112.85 | 8.14(6.36-10.14) | 7.63(5.32-10.68) | 0.21(from 0.13 to 0.28) |
| Malawi | male | 90.94(73.49-110.25) | 237.71(169.54-311.33) | 161.39 | 28.5(23.36-33.93) | 7.58(5.57-9.67) | 1.4(from 1.16 to 1.65) |
| Malaysia | male | 821.19(710.87-947.05) | 4228.81(3199.52-5344.34) | 414.96 | 25.94(23.31-28.53) | 32.34(24.83-40.37) | 1.25(from 1.01 to 1.5) |
| Maldives | male | 4.34(2.96-6.54) | 21.8(17.59-26.52) | 402.28 | 21(12.64-29.53) | 12.54(10.09-15.3) | 1.03(from 0.84 to 1.23) |
| Mali | male | 155.09(126.5-185.42) | 417.35(302.45-546.54) | 169.1 | 51.08(48.26-53.79) | 9.75(7.14-12.58) | 0.8(from 0.71 to 0.9) |
| Malta | male | 60.87(55.12-67.07) | 171.94(144.69-203.67) | 182.48 | 52.38(49.3-55.14) | 40.57(34.01-47.8) | 0.85(from 0.67 to 1.03) |
| Marshall Islands | male | 1.02(0.8-1.27) | 2.49(1.8-3.32) | 143.76 | 10.12(7.84-12.38) | 13.88(10.41-17.99) | 0.53(from 0.37 to 0.69) |
| Mauritania | male | 44.05(32.16-55.07) | 85.35(61.63-110.69) | 93.73 | 6.29(4.73-7.87) | 8.6(6.27-11.04) | -0.32(from -0.59 to -0.06) |
| Mauritius | male | 38.13(34.98-41.56) | 187.7(150.72-233.25) | 392.32 | 55.09(52.99-56.69) | 23.59(19.13-29.52) | 2.34(from 2.04 to 2.64) |
| Mexico | male | 1599.41(1553.54-1636.35) | 9426.09(7749.87-11611.21) | 489.35 | 12.62(10.54-16.54) | 17.22(14.15-21.16) | 2.8(from 2.7 to 2.9) |
| Micronesia (Federated States of) | male | 2.97(2.18-3.94) | 5.62(3.56-8.24) | 89.16 | 7.56(6.36-8.96) | 16.36(11.07-23.13) | 0.84(from 0.8 to 0.88) |
| Monaco | male | 16.8(13.56-20.26) | 33.23(27.15-40.25) | 97.79 | 19.5(18.09-20.92) | 77.49(62.98-93.53) | 1.19(from 1.02 to 1.36) |
| Mongolia | male | 52.2(40.84-65.04) | 140.23(107.29-186.4) | 168.65 | 9.35(8.1-10.63) | 13.65(10.68-17.5) | 0.33(from 0.18 to 0.48) |
| Montenegro | male | 77.38(63.04-92.18) | 179.6(141.47-225.73) | 132.09 | 6.69(5.34-8.68) | 40.54(32.01-50.59) | 1.61(from 1.44 to 1.79) |
| Morocco | male | 448.19(340.23-557.32) | 1738.07(1173.74-2305.63) | 287.79 | 66.35(62.01-71.08) | 11.37(7.65-15.16) | 1.6(from 1.32 to 1.89) |
| Mozambique | male | 131.35(107.4-161.18) | 478.01(336.43-632.42) | 263.91 | 12.29(11.78-12.71) | 10.51(7.54-13.77) | 3.06(from 2.88 to 3.25) |
| Myanmar | male | 1067.54(752.7-1762.35) | 3589.72(2513.61-4616.43) | 236.26 | 21.97(18.41-25.75) | 17.7(12.45-22.42) | 2.28(from 2.19 to 2.36) |
| Namibia | male | 20.23(15.04-25.63) | 67.02(52.71-84.99) | 231.25 | 31.3(29.78-32.83) | 11.46(9.26-14.24) | 2.22(from 2.12 to 2.33) |
| Nauru | male | 0.49(0.3-0.76) | 0.55(0.33-0.75) | 10.74 | 8.93(6.98-11.33) | 24.65(16.49-32.26) | 0(from -0.3 to 0.31) |
| Nepal | male | 154.62(97.24-256.96) | 574.96(405.31-919.93) | 271.85 | 7.52(4.39-13.92) | 5.7(4.03-9.18) | 1.92(from 1.65 to 2.18) |
| Netherlands | male | 4347.45(4089.63-4578.39) | 10118.31(7804.88-12884.99) | 132.74 | 7.17(5.62-8.82) | 64.4(49.56-81.76) | 0.77(from 0.62 to 0.92) |
| New Zealand | male | 1154.37(1081.31-1236.71) | 2290.57(1750.78-2918.87) | 98.43 | 32.54(29.36-36.05) | 63.06(48.07-80.34) | -0.5(from -0.61 to -0.38) |
| Nicaragua | male | 53.64(45.28-63.09) | 339.62(268.13-420.93) | 533.1 | 27.24(22.33-32.16) | 17.5(13.87-21.55) | 3.29(from 3.06 to 3.53) |
| Niger | male | 82.61(57.71-118.86) | 203.1(133.26-301.48) | 145.86 | 6.66(5.25-8.22) | 5.72(3.85-8.35) | 0(from -0.15 to 0.15) |
| Nigeria | male | 1300.92(840.46-1934.44) | 3345.76(2378.03-4671.39) | 157.19 | 4.76(2.91-6.53) | 8.76(6.37-11.98) | 1.61(from 1.42 to 1.81) |
| Niue | male | 0.16(0.12-0.19) | 0.23(0.18-0.29) | 43.69 | 29.64(28.69-30.45) | 23.23(18.14-29.59) | 1.1(from 1.04 to 1.16) |
| North Macedonia | male | 198.26(177.54-218.36) | 659.76(515.34-842.26) | 232.78 | 7.69(6.75-8.66) | 43.13(34.01-54.5) | 2.43(from 2.08 to 2.77) |
| Northern Mariana Islands | male | 3.25(2.5-4.17) | 10.41(8.56-12.37) | 220.2 | 11.91(10.85-12.97) | 39.34(33.38-45.09) | 1.09(from 1.01 to 1.18) |
| Norway | male | 1394.73(1330.42-1455.52) | 2432.98(1960.86-3008) | 74.44 | 21.72(18.34-24.78) | 54.6(44.07-67.52) | 0.65(from 0.39 to 0.9) |
| Oman | male | 32.14(19.65-46.03) | 158(117.64-225.7) | 391.63 | 20.1(17.83-22.46) | 16.18(12.69-20.63) | 2.49(from 2.11 to 2.87) |
| Pakistan | male | 1858.05(1462.58-2243.22) | 5837.06(4245.49-8217.26) | 214.15 | 38.09(35.81-40.14) | 10.26(7.57-14.19) | 1.81(from 1.57 to 2.06) |
| Palau | male | 0.42(0.33-0.54) | 1.14(0.9-1.46) | 170.25 | 5.22(4.24-6.24) | 11.17(9.06-13.93) | 0.62(from 0.54 to 0.69) |
| Palestine | male | 75.17(48.31-111.41) | 353.93(296.57-418.07) | 370.86 | 53.53(50.17-56.83) | 32.01(27.19-37.3) | 1.8(from 1.52 to 2.08) |
| Panama | male | 89.32(81.79-97.23) | 397.92(300.09-506.27) | 345.52 | 30.91(29.27-32.59) | 19.9(15.01-25.28) | 1.84(from 1.75 to 1.93) |
| Papua New Guinea | male | 66.11(42.71-96.77) | 212.75(149.18-296.46) | 221.79 | 16.16(11.67-21.09) | 8.39(5.96-11.37) | 0.57(from 0.52 to 0.62) |
| Paraguay | male | 74.97(64.62-87.63) | 518.62(392.51-668.79) | 591.76 | 28.03(25.04-31.44) | 19.76(15-25.39) | 3.66(from 3.45 to 3.88) |
| Peru | male | 650.44(543.62-771.3) | 3536.24(2554.94-4790.91) | 443.67 | 11.4(10.51-12.41) | 22.94(16.51-31.12) | 3.08(from 2.83 to 3.34) |
| Philippines | male | 2581.17(2240.72-2985.79) | 8847.62(6717.18-11582.77) | 242.78 | 15.66(13.31-18.18) | 23.07(17.71-29.99) | 0.99(from 0.74 to 1.25) |
| Poland | male | 5249.09(5096.25-5391.79) | 14003.65(10949.9-17310.37) | 166.78 | 22.63(14.73-34.03) | 47.96(37.57-59.18) | 1.67(from 1.46 to 1.89) |
| Portugal | male | 2295.89(2178.64-2415.55) | 6197.16(4856.29-7860.16) | 169.92 | 34.33(31.84-36.5) | 62.19(48.69-78.98) | 1.53(from 1.2 to 1.86) |
| Puerto Rico | male | 416.69(388.54-443.13) | 1282.31(970.33-1648.61) | 207.74 | 8.75(5.43-12.49) | 42.86(32.43-55.29) | 2.02(from 1.7 to 2.35) |
| Qatar | male | 8.14(5.76-11.48) | 132.61(90.79-187.05) | 1528.47 | 21.37(20.16-22.58) | 22.03(16.37-29.34) | 2.79(from 2.35 to 3.22) |
| Republic of Korea | male | 2654.66(2466.65-2841.32) | 19862.47(16209.33-24010.17) | 648.21 | 9.75(6.65-13.41) | 50.47(41.2-60.73) | 2.67(from 2.17 to 3.17) |
| Republic of Moldova | male | 552.03(522.19-584.03) | 968.23(836.1-1114.92) | 75.4 | 12.25(8.76-16.8) | 40.25(34.9-46.27) | 1.93(from 1.36 to 2.51) |
| Romania | male | 2601.48(2460.4-2730.27) | 7657.52(6242.73-9160.74) | 194.35 | 57.55(46.55-69.12) | 48.96(39.99-58.78) | 2.89(from 2.65 to 3.12) |
| Russian Federation | male | 16681.23(15917.29-17400.06) | 31580.24(25946.66-37976.35) | 89.32 | 15.3(12.25-18.58) | 35.51(29.34-42.54) | 0.88(from 0.61 to 1.14) |
| Rwanda | male | 129.93(98.68-160.38) | 261.17(184.3-369.62) | 101 | 39.06(37.2-41.05) | 10.59(7.76-14.38) | -0.3(from -0.54 to -0.07) |
| Saint Kitts and Nevis | male | 4.52(3.98-5.09) | 12.07(9.86-14.25) | 166.95 | 13.62(7.62-19.69) | 38.73(32.55-45.04) | 0.72(from 0.54 to 0.89) |
| Saint Lucia | male | 5.8(5.23-6.42) | 20.3(17.03-24.21) | 250.33 | 17.01(13.46-20.79) | 20.53(17.24-24.4) | 0.74(from 0.54 to 0.93) |
| Saint Vincent and the Grenadines | male | 4.52(4.03-5.06) | 14.03(12.04-16.28) | 210.03 | 29.67(28.11-31.32) | 20.69(17.81-23.91) | 1.08(from 0.94 to 1.23) |
| Samoa | male | 4.78(3.87-5.86) | 7.91(6.22-10.66) | 65.5 | 10.48(7.96-16.4) | 11.29(9.03-14.97) | -0.2(from -0.28 to -0.13) |
| San Marino | male | 8.26(7.02-9.69) | 18.99(14.4-24.84) | 129.84 | 6.81(4.4-9.68) | 63.3(47.4-83.03) | 0.59(from 0.54 to 0.64) |
| Sao Tome and Principe | male | 4.18(3.23-5.08) | 11.71(8.12-16.42) | 180.16 | 7.68(5.62-13.4) | 25.24(17.92-35.43) | 1.98(from 1.88 to 2.08) |
| Saudi Arabia | male | 235.76(151.35-340.81) | 2110.2(1590.39-2803.37) | 795.08 | 47.76(43.1-52.61) | 16.79(13.1-21.68) | 3.19(from 2.99 to 3.39) |
| Senegal | male | 140.26(107.66-176.46) | 342.4(257.06-446.13) | 144.12 | 43.21(41.1-45.26) | 9.93(7.68-12.81) | 0.49(from 0.32 to 0.66) |
| Serbia | male | 1810.51(1482.11-2103.6) | 4459.11(3525.3-5680.54) | 146.29 | 9.32(7.44-11.03) | 61.94(49.22-78.21) | 2.42(from 2.23 to 2.61) |
| Seychelles | male | 5.33(4.51-6.09) | 21.44(18.05-25.67) | 302.51 | 37.26(32.89-42.65) | 41.2(34.94-49.08) | 1.6(from 1.25 to 1.96) |
| Sierra Leone | male | 69.63(53.68-86.86) | 127.06(92.27-171.47) | 82.48 | 5.11(4.2-6.11) | 7.37(5.39-9.78) | 0.23(from 0.04 to 0.41) |
| Singapore | male | 510(476.47-543.18) | 1746.03(1370.71-2204.15) | 242.36 | 5.89(4.8-7.03) | 46.92(36.92-58.75) | -0.6(from -0.75 to -0.44) |
| Slovakia | male | 1300.82(1221.44-1391.74) | 3010.3(2305.39-3876.67) | 131.42 | 10.7(8.82-12.47) | 77.47(59.68-98.37) | 1.5(from 1.29 to 1.7) |
| Slovenia | male | 403.26(309.17-517.95) | 1054.86(826.24-1364.36) | 161.58 | 8.11(5.4-12.05) | 56.68(44.19-73.47) | 0.95(from 0.61 to 1.3) |
| Solomon Islands | male | 7.97(5.03-12.03) | 22.63(14.29-34.13) | 183.92 | 11.2(7.5-14.67) | 13.01(8.99-19.12) | 0.85(from 0.74 to 0.95) |
| Somalia | male | 73.28(49.58-133.77) | 166.56(100.27-345.78) | 127.29 | 54.27(51.63-57.2) | 5.81(3.58-11.83) | -0.11(from -0.17 to -0.04) |
| South Africa | male | 1115.58(940.4-1428.05) | 2923.11(2572.21-3385.31) | 162.03 | 12.37(9.81-15.3) | 16.21(14.35-18.69) | 0.88(from 0.62 to 1.13) |
| South Sudan | male | 137.27(73.51-232.96) | 204.52(121.38-322.28) | 48.99 | 22.18(19.9-24.4) | 10.69(6.5-16.58) | 0(from -0.08 to 0.08) |
| Spain | male | 9979.72(9482.87-10465.5) | 27789.67(21817.88-35591.46) | 178.46 | 41.96(32.35-53.42) | 66.61(52.06-85.64) | 1.6(from 1.44 to 1.75) |
| Sri Lanka | male | 313.56(273.42-356.51) | 1201.82(847.8-1623.01) | 283.28 | 46.85(44.8-48.85) | 10.69(7.64-14.25) | 2.56(from 2.39 to 2.72) |
| Sudan | male | 257.6(175.47-457.18) | 917.2(591.48-1612.03) | 256.05 | 58.64(55.9-61.27) | 9.06(6.01-15.93) | 1.9(from 1.78 to 2.02) |
| Suriname | male | 18.94(16.72-21.05) | 69.22(55.06-84.71) | 265.39 | 11.05(7.46-17.19) | 25.48(20.44-31.14) | 1.82(from 1.54 to 2.1) |
| Sweden | male | 2507.76(2352.44-2649.54) | 4097.73(3262.25-5017.68) | 63.4 | 51.61(50.07-52.79) | 41.73(33.18-51.1) | 0.12(from -0.13 to 0.36) |
| Switzerland | male | 1604.55(1507.66-1705.08) | 2997.43(2296.47-3792.96) | 86.81 | 55.16(50.77-60) | 38.21(29.27-48.51) | -0.26(from -0.58 to 0.06) |
| Syrian Arab Republic | male | 188.27(139.33-247.94) | 612.17(423.15-835.04) | 225.16 | 15.89(14.72-17.11) | 9.68(6.72-13.05) | 1.41(from 1.2 to 1.62) |
| Taiwan (Province of China) | male | 2463.73(2356.55-2581.7) | 14775.93(11354.35-19030.43) | 499.74 | 16.98(13.68-20.39) | 80.33(61.8-102.75) | 3.81(from 3.49 to 4.13) |
| Tajikistan | male | 176.79(158.21-197.9) | 312.38(247.83-387.29) | 76.69 | 12.47(9.46-16.18) | 13.31(10.68-16.48) | 0.81(from 0.26 to 1.35) |
| Thailand | male | 2492.74(2120.06-2891.11) | 9686.36(7024.6-12988.04) | 288.58 | 10.87(5.98-18.38) | 20.86(15.27-27.71) | 0.56(from 0.24 to 0.88) |
| Timor-Leste | male | 9.75(5.97-14.11) | 56.71(36.16-76.27) | 481.8 | 18.81(16.22-22.03) | 14.17(9.11-18.97) | 3.18(from 2.86 to 3.49) |
| Togo | male | 46.59(37.3-57.61) | 144.62(100.29-200.06) | 210.38 | 11.1(9.26-13.15) | 9.88(7.04-13.34) | 0.56(from 0.5 to 0.63) |
| Tokelau | male | 0.05(0.04-0.08) | 0.08(0.06-0.12) | 46.46 | 6.02(5.25-6.75) | 12.23(8.67-17.84) | 1.16(from 1.13 to 1.2) |
| Tonga | male | 1.49(1.11-1.86) | 2.77(2.08-3.55) | 86.67 | 12.84(9.24-17.6) | 7.69(5.78-9.69) | 0.87(from 0.61 to 1.13) |
| Trinidad and Tobago | male | 76.22(70.63-82.18) | 208.89(154.37-273.9) | 174.08 | 6.88(4.53-9.8) | 23.75(17.86-30.8) | 0.62(from 0.42 to 0.83) |
| Tunisia | male | 220.31(170.16-274.94) | 992.06(700.92-1386.17) | 350.3 | 10.82(8.54-13.25) | 16.37(11.65-22.62) | 1.94(from 1.86 to 2.03) |
| Turkey | male | 2995.05(2257.65-3917.87) | 11435(9076.38-14169.89) | 281.8 | 16.79(14.39-19.24) | 27.21(21.6-33.59) | 2.14(from 1.63 to 2.66) |
| Turkmenistan | male | 96.39(90.07-103.16) | 181.19(144.12-228.42) | 87.97 | 26.92(25.83-28.08) | 10.49(8.4-13.08) | -0.01(from -0.58 to 0.57) |
| Tuvalu | male | 0.32(0.25-0.4) | 0.63(0.45-0.87) | 95.4 | 36.07(34.47-37.75) | 13.31(9.45-18.1) | 0.43(from 0.37 to 0.48) |
| Uganda | male | 254.4(205.41-303.21) | 944.84(689.99-1191.46) | 271.4 | 8.47(6.04-12.51) | 15.26(11.37-19.1) | 2.01(from 1.8 to 2.22) |
| Ukraine | male | 9379.88(8949.29-9840.4) | 11983.81(9581.35-14688.4) | 27.76 | 16.45(15.47-17.4) | 41.66(33.37-50.84) | -0.16(from -0.47 to 0.16) |
| United Arab Emirates | male | 45.59(26.09-67.44) | 570.96(376.83-783.88) | 1152.32 | 81.56(63.78-107.29) | 22.87(16.04-31.03) | -0.08(from -0.48 to 0.33) |
| United Kingdom | male | 19335.78(18806.95-19776.03) | 29918.21(23475.76-37298.22) | 54.73 | 51.84(48.33-55.3) | 52.15(40.84-65.05) | -0.15(from -0.22 to -0.08) |
| United Republic of Tanzania | male | 448.8(354.25-600.2) | 1251.21(920.18-1792.84) | 178.79 | 20.54(19.47-21.54) | 10.92(8.26-15.11) | 0.75(from 0.68 to 0.82) |
| United States of America | male | 77408.91(75172.85-79335.87) | 122610.05(99928.19-148550.65) | 58.39 | 34.28(27.67-39.81) | 49.42(40.36-59.86) | -0.84(from -0.98 to -0.71) |
| United States Virgin Islands | male | 10.45(8.57-12.43) | 45.67(36.24-55.23) | 337.04 | 8.37(5.04-11.18) | 55.97(44.83-68.02) | 3.15(from 2.77 to 3.53) |
| Uruguay | male | 663.31(626.5-704.12) | 1071.05(843.71-1368.37) | 61.47 | 28.36(23.13-34.11) | 47.61(37.45-60.77) | 0.63(from 0.5 to 0.75) |
| Uzbekistan | male | 533.54(505.71-560.91) | 1233.63(1022.16-1464.1) | 131.21 | 10.68(8.22-13.43) | 13.87(11.74-16.17) | 1.06(from 0.91 to 1.2) |
| Vanuatu | male | 3.06(2.09-4.13) | 9.72(7.11-13.08) | 218.14 | 39.42(37.27-41.81) | 10.77(7.95-14.29) | 0.7(from 0.58 to 0.82) |
| Venezuela (Bolivarian Republic of) | male | 486.23(458.55-515.38) | 2715.85(2002.2-3615.35) | 458.55 | 7.41(5.97-9.39) | 20.01(14.87-26.5) | 1.88(from 1.5 to 2.26) |
| Viet Nam | male | 2161.12(1691.58-2712.95) | 15444.52(11944.26-19469.82) | 614.65 | 5.29(3.57-9.38) | 37.77(30.1-46.39) | 4.12(from 3.97 to 4.27) |
| Yemen | male | 137.02(77.82-227.21) | 523.01(364.44-766.55) | 281.71 | 7.8(6.65-9.02) | 7.91(5.6-11.44) | 1.47(from 1.32 to 1.61) |
| Zambia | male | 156.21(121.92-194.54) | 509.11(365.92-657.1) | 225.92 | 14.73(12.51-17.07) | 15.89(11.52-20.33) | 1.2(from 1.13 to 1.27) |
| Zimbabwe | male | 207.95(174.96-243.23) | 395.39(296.85-496.17) | 90.14 | 7.61(7.03-8.21) | 13.56(10.36-16.69) | 0.19(from -0.15 to 0.53) |

**Table S5** Age distribution of death rate (per 100,000) for Colorectal cancer in different countries in 2019..

| **location** | **5-9** | **10-14** | **15-19** | **20-24** | **25-29** | **30-34** | **35-39** | **40-44** | **45-49** | **50-54** | **55-59** | **60-64** | **65-69** | **70-74** | **75-79** | **80-84** | **85-89** | **90-94** | **≥95** |
| --- | --- | --- | --- | --- | --- | --- | --- | --- | --- | --- | --- | --- | --- | --- | --- | --- | --- | --- | --- |
| Afghanistan | 0.024429536 | 0.030547274 | 0.093015033 | 0.241423624 | 0.543947382 | 1.346036951 | 2.519656569 | 4.539856275 | 8.001604441 | 12.81023038 | 18.78804947 | 26.45139622 | 35.13480891 | 47.89239416 | 61.78131735 | 78.06545685 | 96.67423026 | 102.1108654 | 112.6838903 |
| Albania | 0.13102422 | 0.104013676 | 0.207633421 | 0.6112871 | 1.100473593 | 1.676865286 | 2.332788787 | 3.149314654 | 4.896594078 | 8.331512096 | 12.00690937 | 22.06559169 | 33.58783999 | 56.81572344 | 85.85726576 | 121.2787925 | 143.5455541 | 165.0517968 | 192.2473395 |
| Algeria | 0.025298801 | 0.033069537 | 0.06752227 | 0.160692635 | 0.321378611 | 0.788727046 | 1.475802562 | 2.647741856 | 4.590672659 | 7.521422774 | 11.84844858 | 19.5686966 | 28.32028326 | 41.99179636 | 65.13714042 | 97.48654548 | 190.2504488 | 215.8520285 | 198.8105078 |
| American Samoa | 0.044303101 | 0.053043486 | 0.409874716 | 0.660976186 | 1.461389895 | 2.405478512 | 3.506330272 | 5.526765125 | 11.19608204 | 18.29176718 | 29.38871915 | 43.90705179 | 63.49731239 | 88.27276566 | 128.4208706 | 189.8323899 | 315.3037335 | 252.7665363 | 614.7531031 |
| Andorra | 0.018047381 | 0.022644326 | 0.056605071 | 0.212091748 | 0.547106412 | 1.3073592 | 2.486758184 | 4.810265411 | 9.447086237 | 18.15797108 | 31.75717927 | 53.88451885 | 84.96316917 | 134.9420014 | 209.9669964 | 318.4994558 | 471.0650732 | 598.6563122 | 730.8668467 |
| Angola | 0.032987323 | 0.037329604 | 0.109846444 | 0.246483093 | 0.45985035 | 1.027882514 | 1.81277594 | 3.323612489 | 6.351782174 | 11.50599618 | 18.69443761 | 29.27422799 | 41.3377485 | 57.51277312 | 78.93390431 | 106.319367 | 134.9482563 | 154.7825911 | 182.8335423 |
| Antigua and Barbuda | 0.033744475 | 0.03183804 | 0.144333346 | 0.314126519 | 0.547627956 | 0.991157911 | 1.89738201 | 3.142831266 | 6.124119245 | 12.66572453 | 24.22825708 | 42.15035675 | 59.00145909 | 92.33982116 | 144.143789 | 237.922895 | 304.8210066 | 399.8266041 | 465.4114257 |
| Argentina | 0.034998597 | 0.057791912 | 0.249518736 | 0.546970178 | 0.990936847 | 2.057774536 | 3.768744684 | 6.32475466 | 12.27714858 | 22.72831722 | 39.51997512 | 66.59845779 | 97.15179916 | 142.3245384 | 202.904413 | 286.3761477 | 398.8298968 | 467.8388737 | 531.2412091 |
| Armenia | 0.028625942 | 0.029748212 | 0.17460117 | 0.405510739 | 0.651809158 | 1.440666892 | 2.43085682 | 4.400911535 | 7.904388097 | 13.26848434 | 23.70375636 | 41.04730335 | 66.07646524 | 104.8607162 | 134.8852933 | 164.920691 | 160.9826573 | 191.9251575 | 225.1007011 |
| Australia | 0.021702815 | 0.028997015 | 0.068388412 | 0.227527866 | 0.599325786 | 1.409520139 | 2.215825825 | 4.179236446 | 8.284799723 | 14.27378142 | 22.69645918 | 38.29383649 | 57.12003167 | 86.44171023 | 140.7787182 | 201.6855194 | 291.8956111 | 388.2610853 | 460.6287635 |
| Austria | 0.01003998 | 0.012172104 | 0.032711241 | 0.107318916 | 0.210599815 | 0.588937701 | 1.110760794 | 2.482594805 | 5.500593119 | 10.27729672 | 19.04082428 | 34.09450864 | 54.94290154 | 83.47832331 | 120.2416806 | 182.8727798 | 262.8380399 | 341.2424557 | 418.9296289 |
| Azerbaijan | 0.051121099 | 0.058028894 | 0.396304291 | 0.780695339 | 1.088920062 | 1.954322549 | 3.342968494 | 5.617209962 | 9.255703374 | 15.46417706 | 24.90763777 | 37.41018236 | 54.99456389 | 69.36638656 | 92.60254907 | 121.4582867 | 145.3318452 | 182.0351692 | 174.2467376 |
| Bahamas | 0.039074638 | 0.04524321 | 0.255893013 | 0.608773258 | 1.291512509 | 2.946518543 | 4.932650672 | 7.534570238 | 11.69937426 | 21.10961014 | 32.6348567 | 50.22651386 | 77.43448222 | 107.1494434 | 153.7976506 | 207.1225806 | 260.0873168 | 329.768026 | 355.7846912 |
| Bahrain | 0.028844434 | 0.03461792 | 0.111254209 | 0.360606916 | 0.447986147 | 1.012833408 | 1.399361654 | 2.507315135 | 4.673323251 | 8.373565957 | 12.99606075 | 24.92841199 | 41.74018048 | 69.94443496 | 102.4773664 | 158.9984868 | 237.9650806 | 313.8947107 | 419.5605714 |
| Bangladesh | 0.032512069 | 0.04201735 | 0.061857069 | 0.11885377 | 0.212022798 | 0.455237832 | 0.771934402 | 1.422044528 | 3.108200413 | 5.881130166 | 8.524658423 | 13.31135844 | 19.79784106 | 28.37744108 | 39.76217653 | 64.32550586 | 80.26828346 | 89.53059539 | 106.8464633 |
| Barbados | 0.043496482 | 0.056441546 | 0.294878061 | 0.506676049 | 0.937012843 | 2.305731599 | 3.548921452 | 6.133124981 | 10.9103305 | 19.36471476 | 36.77470376 | 64.98578506 | 91.95868297 | 143.8933513 | 225.0186062 | 307.8879715 | 424.6877133 | 515.3277586 | 589.4727931 |
| Belarus | 0.017231865 | 0.025190013 | 0.131390997 | 0.285993051 | 0.564462986 | 1.212706378 | 2.430125202 | 4.404448473 | 8.75563071 | 17.8406569 | 31.99471773 | 53.86575691 | 83.92219935 | 120.3427933 | 154.5210886 | 190.5321611 | 180.6534169 | 209.4537904 | 242.8392269 |
| Belgium | 0.024298661 | 0.024583311 | 0.062696643 | 0.139247456 | 0.321546545 | 0.740473372 | 1.476626782 | 2.939623594 | 6.62734183 | 12.7235881 | 23.21541758 | 40.45377883 | 63.04489613 | 100.195911 | 150.6640604 | 228.1460829 | 358.7005619 | 522.0433128 | 680.3535722 |
| Belize | 0.025063945 | 0.027671395 | 0.168330791 | 0.332082743 | 0.710308085 | 1.668736363 | 2.210863737 | 3.727996465 | 6.860997919 | 12.55008167 | 20.9841053 | 30.61850171 | 41.14045425 | 58.56222212 | 84.53593087 | 118.7025362 | 148.3418881 | 178.1629618 | 210.1391285 |
| Benin | 0.039722588 | 0.048038206 | 0.074242219 | 0.2325615 | 0.277295266 | 0.658786663 | 1.55466723 | 2.0357665 | 4.034983083 | 7.928205209 | 11.24990248 | 19.45529491 | 29.56491442 | 44.56171843 | 73.3924379 | 108.6375897 | 115.0868477 | 138.4288358 | 162.9977694 |
| Bermuda | 0.03204338 | 0.029476576 | 0.19441805 | 0.38262157 | 0.558378678 | 1.176095341 | 2.159670962 | 4.327323546 | 8.29891298 | 15.57789911 | 25.88249392 | 41.42609817 | 65.24757115 | 100.2874411 | 166.6597078 | 262.0885499 | 406.4808676 | 551.4982398 | 721.9775233 |
| Bhutan | 0.025827218 | 0.028110119 | 0.067131712 | 0.144098886 | 0.251458274 | 0.594940325 | 1.018351261 | 1.884205208 | 4.09939812 | 6.407886376 | 10.36323117 | 16.61819528 | 26.29128338 | 42.65546384 | 65.83196521 | 99.91669297 | 121.6361124 | 121.9311858 | 132.8983556 |
| Bolivia (Plurinational State of) | 0.030323428 | 0.041138271 | 0.152274947 | 0.271909644 | 0.528126622 | 0.989834233 | 1.765402413 | 3.137125104 | 6.050399956 | 10.90204218 | 18.18839035 | 31.05218505 | 48.64375307 | 78.80586837 | 114.8496883 | 156.8615524 | 219.5993211 | 236.2001396 | 243.7481914 |
| Bosnia and Herzegovina | 0.056141609 | 0.087937464 | 0.262166695 | 0.622764088 | 0.943671486 | 2.021456479 | 3.315086818 | 6.558049489 | 11.31307517 | 20.97585933 | 39.05386216 | 61.43397081 | 89.69280795 | 157.304255 | 222.5872762 | 278.775773 | 297.6897869 | 286.3286232 | 326.7304917 |
| Botswana | 0.059784569 | 0.067206559 | 0.152065363 | 0.326906229 | 0.693993261 | 1.547028954 | 2.994978754 | 5.497729421 | 10.09075292 | 17.60276055 | 28.18956341 | 41.29732851 | 62.38971564 | 88.63118835 | 135.8168468 | 200.7302352 | 257.1747603 | 281.1740017 | 279.4831154 |
| Brazil | 0.019518973 | 0.043846695 | 0.156005448 | 0.359818998 | 0.69403631 | 1.462193511 | 2.57782063 | 4.60219047 | 8.392097129 | 13.7043062 | 22.18549547 | 33.67472643 | 47.77654113 | 67.21380651 | 94.28747756 | 129.0791785 | 173.3174244 | 196.3810462 | 228.6877484 |
| Brunei Darussalam | 0.039085215 | 0.062360006 | 0.216283881 | 0.594471807 | 1.204089126 | 2.576593894 | 4.555222853 | 8.258810961 | 15.0987188 | 25.19198384 | 43.47912194 | 70.02365398 | 119.8670281 | 185.1622262 | 262.086707 | 409.9935064 | 595.2967581 | 686.7123131 | 679.4211009 |
| Bulgaria | 0.02571211 | 0.040400584 | 0.194064867 | 0.405645338 | 0.919363592 | 2.078325854 | 4.053263388 | 7.793886798 | 15.1052111 | 29.46737489 | 53.31533128 | 82.48689652 | 117.6986815 | 157.7977245 | 213.815113 | 261.5747023 | 305.2877594 | 317.6824102 | 360.4737405 |
| Burkina Faso | 0.03724829 | 0.041373928 | 0.063553712 | 0.205441781 | 0.264416882 | 0.643802631 | 1.511368091 | 2.088162176 | 4.100098153 | 7.749602879 | 11.13158358 | 18.98457558 | 28.41153078 | 43.4668915 | 69.5795333 | 101.0432099 | 103.3019936 | 122.8493168 | 142.8407434 |
| Burundi | 0.023369544 | 0.034703209 | 0.074172927 | 0.18917232 | 0.39970279 | 0.810778156 | 1.488619511 | 2.905242044 | 5.298048833 | 8.941253977 | 14.86609398 | 23.28408873 | 33.19049274 | 42.80901792 | 53.30949049 | 74.04290348 | 91.90963296 | 96.58326654 | 102.8307802 |
| Cabo Verde | 0.036847804 | 0.05286231 | 0.122664693 | 0.387190829 | 0.280178135 | 0.718959667 | 1.854697005 | 2.330732169 | 4.944032449 | 9.08090302 | 13.58920455 | 22.94419683 | 36.45209589 | 60.42613659 | 104.6909764 | 188.5488959 | 245.5264382 | 295.6924557 | 357.0984245 |
| Cambodia | 0.038622304 | 0.06125172 | 0.28018653 | 0.555137716 | 0.91546409 | 1.835959591 | 3.056197132 | 5.449616449 | 9.836489562 | 18.21730246 | 27.73429878 | 42.69117021 | 61.61611352 | 84.09621219 | 113.7000184 | 145.3312632 | 181.9915446 | 184.9947741 | 225.8962773 |
| Cameroon | 0.050498084 | 0.061539757 | 0.09950529 | 0.33521876 | 0.395965535 | 0.980730006 | 2.301067046 | 3.095217155 | 5.933475616 | 11.0908494 | 15.9249862 | 28.68300926 | 42.81757929 | 63.32030431 | 100.126485 | 146.9083084 | 152.0878004 | 176.9044874 | 206.9038007 |
| Canada | 0.021346186 | 0.027097305 | 0.052659262 | 0.166214833 | 0.449412785 | 1.105094474 | 1.975446907 | 3.990394771 | 7.606702064 | 14.41845951 | 24.79627843 | 41.03709414 | 62.32916923 | 92.86099667 | 143.2395298 | 211.2005139 | 297.2525737 | 418.1598413 | 558.2111686 |
| Central African Republic | 0.026674482 | 0.027905662 | 0.081157038 | 0.176162027 | 0.322066301 | 0.703841644 | 1.369758948 | 2.730365506 | 5.50791864 | 9.752133316 | 15.40966587 | 21.71831464 | 28.76957138 | 36.31842017 | 45.92710335 | 57.43486761 | 69.36072173 | 76.91887577 | 80.98908332 |
| Chad | 0.047941155 | 0.050725165 | 0.069550462 | 0.216203122 | 0.254488323 | 0.620092318 | 1.469407169 | 1.98503368 | 4.077216632 | 8.065570667 | 11.411616 | 20.31104046 | 30.19053286 | 46.23099035 | 69.80525782 | 97.55361001 | 100.5614101 | 115.4522571 | 131.9691557 |
| Chile | 0.017031346 | 0.028302893 | 0.102888848 | 0.243765737 | 0.571443415 | 1.203279562 | 2.238320446 | 3.393923659 | 7.030481715 | 11.78912072 | 20.58187293 | 33.51350446 | 56.66244249 | 85.72607751 | 130.0753862 | 198.8433106 | 292.6797075 | 382.2286058 | 442.4319401 |
| China | 0.028809602 | 0.035625189 | 0.203299492 | 0.5321401 | 1.046234238 | 2.299343974 | 3.934247759 | 6.386767044 | 9.143968185 | 14.40597891 | 22.40247544 | 34.67778438 | 51.38208336 | 82.38171039 | 120.3870169 | 160.9329314 | 237.5506255 | 239.7947472 | 258.9851916 |
| Colombia | 0.034319652 | 0.046416104 | 0.203860855 | 0.496579588 | 0.96480331 | 1.534299931 | 2.404911594 | 3.784502131 | 6.169402059 | 9.893673208 | 15.86334235 | 26.74011331 | 38.54230525 | 58.35292921 | 84.40096235 | 111.0304596 | 138.8135107 | 153.8429098 | 198.8541352 |
| Comoros | 0.026610899 | 0.04107706 | 0.069136366 | 0.216579001 | 0.467199395 | 0.962539364 | 1.750793521 | 3.304897425 | 5.828086644 | 9.716834308 | 15.77831792 | 25.92000293 | 37.7832511 | 51.58125981 | 66.95403071 | 96.35146211 | 122.0932233 | 133.9246369 | 145.9143972 |
| Congo | 0.026816337 | 0.03231604 | 0.104000547 | 0.243752426 | 0.506017326 | 1.147267291 | 2.178904881 | 4.003568948 | 7.663134783 | 13.62374181 | 22.47179424 | 34.08005632 | 48.38537032 | 66.2405189 | 93.46235017 | 123.8397562 | 166.8030819 | 190.9570566 | 220.2541453 |
| Cook Islands | 0.011784517 | 0.015256033 | 0.105791568 | 0.218642883 | 0.570530759 | 1.038549323 | 1.675484285 | 2.528934291 | 4.974268705 | 7.89674557 | 12.67244348 | 18.93909402 | 28.53327899 | 40.86342539 | 61.57072474 | 96.06442014 | 156.8067798 | 135.4601788 | 343.7938529 |
| Costa Rica | 0.026407315 | 0.050509204 | 0.247172365 | 0.638614907 | 1.181044453 | 2.211047402 | 3.263509822 | 4.998048817 | 9.069884198 | 14.89832948 | 24.73240238 | 41.10017266 | 60.73400678 | 84.67233167 | 132.2042879 | 185.4076768 | 262.0531745 | 316.9940755 | 422.5828637 |
| Croatia | 0.020112603 | 0.022284823 | 0.080103541 | 0.236759335 | 0.575902842 | 1.243489964 | 2.711815029 | 5.303363946 | 10.83606282 | 21.47047112 | 41.2292211 | 67.37009286 | 108.9553389 | 160.8214232 | 237.4197411 | 332.8806716 | 418.0636545 | 469.2327251 | 567.6408327 |
| Cuba | 0.025675374 | 0.035629113 | 0.136782808 | 0.264060087 | 0.489865806 | 1.129892915 | 2.204603093 | 4.419402216 | 8.067100491 | 14.27774376 | 24.91951364 | 47.03898949 | 72.2814278 | 108.8398467 | 173.0879521 | 238.6545748 | 309.1115772 | 379.0588156 | 416.5466536 |
| Cyprus | 0.026216422 | 0.026150841 | 0.048834497 | 0.113324836 | 0.310177501 | 0.559348635 | 1.253211567 | 2.571257982 | 5.327091474 | 9.502372667 | 16.52478486 | 28.72332761 | 47.08122617 | 73.82855266 | 126.9349156 | 218.0051928 | 363.8864984 | 482.8389437 | 514.2208424 |
| Czechia | 0.015072624 | 0.018436002 | 0.066647556 | 0.15589055 | 0.384292238 | 0.996977967 | 1.913808214 | 3.953548125 | 9.096176715 | 17.51773102 | 34.96020042 | 60.72698817 | 98.26121878 | 144.5672668 | 197.2735818 | 274.9919538 | 356.1703953 | 381.2225148 | 418.127672 |
| C么te d'Ivoire | 0.044347682 | 0.05416923 | 0.090583887 | 0.299192301 | 0.338604254 | 0.833019617 | 1.898406722 | 2.600726456 | 4.95980508 | 9.456287478 | 13.67930803 | 24.36146331 | 37.17807201 | 55.28843291 | 90.51986315 | 133.5544343 | 141.914127 | 163.7578864 | 193.8035833 |
| Democratic People's Republic of Korea | 0.018412955 | 0.029748922 | 0.267292367 | 0.614803518 | 1.112761409 | 2.21729485 | 3.574624842 | 5.890527776 | 10.14116139 | 16.36617165 | 25.4866005 | 36.77006522 | 48.44633111 | 63.2888537 | 79.32052487 | 87.64769673 | 102.1941357 | 108.1284555 | 118.6740786 |
| Democratic Republic of the Congo | 0.019485081 | 0.021885501 | 0.063395513 | 0.143950772 | 0.273366524 | 0.630743869 | 1.129601946 | 2.0679061 | 4.068611828 | 7.640528378 | 12.57049791 | 19.38050459 | 27.18575736 | 37.14305355 | 49.70959359 | 66.43859708 | 85.13484844 | 100.3307519 | 119.7721769 |
| Denmark | 0.023499626 | 0.024795509 | 0.064903446 | 0.193265008 | 0.408088873 | 0.977090485 | 1.748645085 | 3.446079004 | 7.497747295 | 15.56076485 | 28.79459181 | 53.70229841 | 79.94660277 | 135.9917035 | 212.9418258 | 307.9284565 | 423.8938976 | 543.2929083 | 669.0404206 |
| Djibouti | 0.031316272 | 0.048717979 | 0.088062147 | 0.228805286 | 0.504228853 | 1.095042107 | 2.052158339 | 4.119955053 | 7.597300538 | 12.85193713 | 21.07217594 | 34.05303611 | 50.01242967 | 67.536971 | 88.83168413 | 126.1707526 | 159.4010583 | 168.117023 | 182.5218843 |
| Dominica | 0.037530718 | 0.060466737 | 0.233479606 | 0.415563779 | 0.764507386 | 1.603101826 | 2.784644356 | 4.453825791 | 7.444892831 | 12.99247589 | 22.38580221 | 36.6799077 | 58.89095466 | 90.39239138 | 132.9246823 | 194.867044 | 258.2409786 | 339.7756107 | 372.9220407 |
| Dominican Republic | 0.06068667 | 0.061159914 | 0.236220818 | 0.43666034 | 0.852923131 | 1.932221496 | 3.181246358 | 5.046016096 | 8.375371522 | 14.37968028 | 20.10001195 | 35.57763656 | 42.59738196 | 72.8245131 | 92.37904301 | 133.3821725 | 227.5957974 | 280.9937012 | 303.9760121 |
| Ecuador | 0.033773861 | 0.058227851 | 0.234993761 | 0.453541368 | 0.898891731 | 1.544892861 | 2.536768715 | 3.535748899 | 6.228316683 | 9.773463083 | 16.51083287 | 26.9299159 | 38.10804416 | 57.58582956 | 87.02169165 | 143.57044 | 231.3636877 | 364.9340436 | 444.6038464 |
| Egypt | 0.043297954 | 0.059697013 | 0.126681324 | 0.27396142 | 0.558889033 | 1.211906414 | 1.919851891 | 3.035705577 | 6.000773164 | 11.09296842 | 16.70810214 | 25.35741777 | 32.62031256 | 43.28703159 | 56.32872171 | 69.70135104 | 79.01309304 | 85.13533227 | 95.66821394 |
| El Salvador | 0.022675946 | 0.038191584 | 0.167853276 | 0.393530213 | 0.816796933 | 1.76699247 | 2.847303609 | 4.271681325 | 6.829825879 | 10.96681407 | 15.9410556 | 23.85654299 | 34.65253674 | 50.0375533 | 75.04910382 | 100.9155336 | 136.8237812 | 142.935755 | 188.5561769 |
| Equatorial Guinea | 0.029473524 | 0.035168644 | 0.132054569 | 0.307251493 | 0.594746051 | 1.313746313 | 2.349995275 | 4.215403906 | 8.141595737 | 14.32686565 | 24.48937527 | 38.41296375 | 58.45174848 | 83.64469286 | 125.8598394 | 175.4636564 | 235.0812654 | 269.7008762 | 300.7840425 |
| Eritrea | 0.02207798 | 0.039024579 | 0.082446391 | 0.230713208 | 0.521222515 | 1.11892945 | 2.264042466 | 4.493192526 | 8.465791146 | 13.68496276 | 21.682145 | 32.72891916 | 45.21470805 | 57.63125332 | 71.47441502 | 97.04443602 | 123.2676914 | 132.9680384 | 136.5248058 |
| Estonia | 0.015023308 | 0.025144818 | 0.152749435 | 0.224561708 | 0.487625113 | 1.242658527 | 2.015937637 | 3.865418267 | 8.119250488 | 14.12202327 | 26.47550321 | 46.8564434 | 73.04593561 | 120.9916838 | 176.2656384 | 255.8301494 | 318.4504739 | 400.3389331 | 430.6118063 |
| Eswatini | 0.052510662 | 0.059157843 | 0.147607919 | 0.306267527 | 0.62719707 | 1.424311291 | 2.800485323 | 5.415863694 | 9.917435563 | 16.99183504 | 25.41882595 | 36.30317836 | 53.42526005 | 73.14396287 | 111.0320326 | 165.6777208 | 212.1483286 | 235.0401005 | 218.3368041 |
| Ethiopia | 0.014411052 | 0.022998096 | 0.059184942 | 0.15967734 | 0.37557588 | 0.849586433 | 1.533435363 | 2.914087685 | 5.386051226 | 9.473370913 | 14.26207865 | 22.59210475 | 31.45715384 | 41.75433823 | 54.29356418 | 82.13335801 | 102.5500051 | 118.3126249 | 130.4783614 |
| Fiji | 0.06053606 | 0.069181397 | 0.314679634 | 0.437483971 | 0.95429114 | 1.413380872 | 2.282533255 | 3.59140998 | 7.687042875 | 12.94210825 | 20.44447897 | 32.78488819 | 45.97821144 | 61.03970101 | 86.92710851 | 136.06619 | 238.3036929 | 184.8547568 | 308.6804901 |
| Finland | 0.019010059 | 0.022778263 | 0.042533852 | 0.120643894 | 0.277272758 | 0.714602096 | 1.309083467 | 2.493458716 | 5.417434322 | 10.1252141 | 17.65981237 | 28.70852651 | 47.73940881 | 72.18967277 | 113.3256517 | 176.6646467 | 237.0182377 | 296.76602 | 360.4817821 |
| France | 0.016755298 | 0.018660089 | 0.040773144 | 0.126288889 | 0.355316545 | 0.867556198 | 1.775034908 | 3.415982803 | 7.095730927 | 13.15883186 | 23.63351789 | 39.7628546 | 60.63285535 | 88.35117771 | 133.6174824 | 211.1495634 | 347.8465542 | 531.4774367 | 748.5303142 |
| Gabon | 0.032685867 | 0.039184136 | 0.145417919 | 0.321681014 | 0.592656738 | 1.348347124 | 2.513981165 | 4.739837423 | 9.273037722 | 16.66010181 | 28.41549511 | 44.2937076 | 65.28727227 | 88.83572361 | 123.264752 | 163.8038813 | 217.7090227 | 255.2579696 | 301.4196695 |
| Gambia | 0.027706137 | 0.032256739 | 0.047734174 | 0.150288259 | 0.198525612 | 0.493460843 | 1.180458864 | 1.850507034 | 3.72708104 | 7.166586126 | 10.66879205 | 18.51393154 | 28.01221395 | 40.98561415 | 61.92913947 | 83.78026966 | 89.5813076 | 100.2378242 | 109.0736612 |
| Georgia | 0.024055256 | 0.03561981 | 0.360842697 | 0.689217177 | 1.080650142 | 2.143333121 | 3.453033081 | 6.13874556 | 10.51405032 | 18.18889385 | 30.78962468 | 44.73781123 | 59.54421958 | 85.14022124 | 111.0906065 | 124.0545825 | 93.4929093 | 96.81369795 | 106.4685675 |
| Germany | 0.021595097 | 0.026184859 | 0.056238049 | 0.159331265 | 0.39415879 | 0.94256277 | 1.927926933 | 3.882997202 | 7.536362193 | 14.30918545 | 24.84357287 | 41.43175774 | 64.818162 | 104.03967 | 159.153339 | 245.3898346 | 379.8500601 | 519.1396551 | 650.0086913 |
| Ghana | 0.069534884 | 0.089855541 | 0.16935968 | 0.60770652 | 0.42867252 | 0.956049845 | 2.246897734 | 2.703312689 | 4.976325845 | 9.953571266 | 13.22030247 | 24.18109702 | 33.68035489 | 49.98152841 | 80.15322065 | 121.7481777 | 123.1518497 | 139.9425471 | 161.7345953 |
| Greece | 0.027615796 | 0.030338395 | 0.067709505 | 0.138642736 | 0.314343121 | 0.829959654 | 1.49799354 | 3.205417467 | 6.304312111 | 12.3296581 | 20.06136079 | 34.38128306 | 53.33663021 | 83.3996179 | 134.8355454 | 207.8590072 | 317.0618003 | 407.2062212 | 497.5514488 |
| Greenland | 0.028008414 | 0.051286712 | 0.141569091 | 0.319268291 | 0.773053493 | 2.160886076 | 4.418162285 | 9.03438016 | 19.18444042 | 34.61831689 | 57.22326893 | 88.36359449 | 126.892371 | 180.6761078 | 269.8159072 | 378.6594172 | 522.7009708 | 596.4325826 | 684.0025966 |
| Grenada | 0.040451597 | 0.041362003 | 0.217078019 | 0.410068473 | 0.67570015 | 1.893076923 | 3.345872689 | 5.347408825 | 9.350719579 | 16.78763056 | 30.50679006 | 55.0013391 | 89.58589468 | 122.0607996 | 164.1450212 | 226.1130979 | 312.4904639 | 364.8919347 | 399.9003329 |
| Guam | 0.050635487 | 0.072896174 | 0.499005284 | 0.642690145 | 1.594765821 | 2.991163766 | 4.376602263 | 6.125845148 | 10.59686426 | 19.56502201 | 28.37113637 | 40.22542152 | 57.94609761 | 70.0036753 | 98.50174742 | 136.1757129 | 236.659643 | 199.0628418 | 474.9012516 |
| Guatemala | 0.03967333 | 0.057627361 | 0.250746909 | 0.45037403 | 0.820338786 | 1.482752337 | 2.714715232 | 3.856352705 | 6.310523731 | 9.970250458 | 14.28093177 | 22.72847119 | 33.51768268 | 46.47849085 | 65.07396511 | 99.18173414 | 172.2490931 | 251.6513638 | 274.3165084 |
| Guinea | 0.044225375 | 0.047382598 | 0.074896219 | 0.213360912 | 0.290503523 | 0.679251912 | 1.440996235 | 2.136922604 | 4.138145674 | 8.156954715 | 11.89148063 | 20.67208274 | 30.64452344 | 44.81100817 | 67.56177366 | 91.84669151 | 93.40642604 | 107.3454854 | 126.8631846 |
| Guinea-Bissau | 0.0321005 | 0.045865224 | 0.089121483 | 0.307580282 | 0.366068795 | 0.92283767 | 2.290023868 | 3.152397764 | 6.120954309 | 11.17332484 | 15.98902501 | 26.54178085 | 37.80354891 | 53.60941065 | 78.15409215 | 111.0029866 | 116.9145719 | 131.8105292 | 144.3832111 |
| Guyana | 0.049659789 | 0.055535203 | 0.222507981 | 0.523411084 | 1.02566025 | 2.405091041 | 3.909703461 | 6.649022438 | 10.71528225 | 18.63615385 | 29.51439387 | 43.84527009 | 56.65955323 | 78.64375978 | 117.2242824 | 157.7054026 | 197.0404498 | 268.8455053 | 307.5493604 |
| Haiti | 0.071844116 | 0.050614162 | 0.148496383 | 0.268951691 | 0.520049388 | 1.206481135 | 2.112407534 | 3.940066909 | 6.815066992 | 12.3684205 | 20.1542491 | 31.6274458 | 44.77575035 | 63.0970946 | 88.18591937 | 117.4102699 | 144.3378217 | 165.9644469 | 169.9514549 |
| Honduras | 0.014465411 | 0.026245772 | 0.09475434 | 0.173054346 | 0.27776272 | 0.600290957 | 1.165352245 | 2.447543257 | 4.809804768 | 8.22708513 | 13.52024763 | 21.83955809 | 32.12973845 | 46.66135971 | 67.29892245 | 85.90564561 | 115.2212795 | 142.5905443 | 166.9708096 |
| Hungary | 0.019910546 | 0.029025715 | 0.090248759 | 0.236848791 | 0.677819651 | 1.573552721 | 3.236892413 | 6.089048456 | 13.4248673 | 29.15871776 | 55.99352447 | 91.33648008 | 132.2979131 | 188.9016571 | 256.7380403 | 313.4708901 | 401.1470261 | 425.2640859 | 452.6760877 |
| Iceland | 0.017821885 | 0.017983479 | 0.040781678 | 0.126849318 | 0.275706557 | 0.611453282 | 1.236540996 | 2.451338212 | 4.90025599 | 9.341060555 | 16.8617529 | 28.52505235 | 44.2350164 | 67.98354336 | 106.6856207 | 163.0685139 | 232.504882 | 312.4847479 | 419.2746735 |
| India | 0.035741106 | 0.041055304 | 0.090882788 | 0.228318712 | 0.360935849 | 0.898234405 | 1.536206938 | 2.684187554 | 5.532721062 | 9.262011227 | 13.82599295 | 19.90977893 | 29.03321007 | 42.90588193 | 63.15885296 | 98.82999139 | 105.4727033 | 116.4204065 | 128.0746955 |
| Indonesia | 0.043637158 | 0.06931069 | 0.312479941 | 0.559584564 | 0.927488609 | 1.865399097 | 3.135463752 | 5.539098523 | 9.814643457 | 17.72787369 | 27.17899436 | 43.84142941 | 66.62919288 | 94.99040622 | 130.6135625 | 173.759056 | 233.5087534 | 250.5086397 | 318.665693 |
| Iran (Islamic Republic of) | 0.041205019 | 0.059133232 | 0.176980809 | 0.30420368 | 0.562153525 | 1.236610761 | 1.93116236 | 3.107207598 | 5.545059984 | 9.461148832 | 15.77488537 | 25.22539734 | 36.4421264 | 54.84535812 | 83.36684672 | 114.1813253 | 144.4707178 | 162.8618288 | 205.7613923 |
| Iraq | 0.026078991 | 0.033926222 | 0.15395601 | 0.333129614 | 0.520835468 | 1.012415103 | 1.852116972 | 3.55495995 | 6.840805946 | 11.29523032 | 16.16342377 | 22.72466704 | 33.00150194 | 48.09233945 | 68.36844073 | 93.02030549 | 116.0308779 | 120.5237743 | 129.4785485 |
| Ireland | 0.01804278 | 0.019342653 | 0.041954036 | 0.148842921 | 0.36971836 | 0.830411849 | 1.621682006 | 3.180089469 | 6.515810692 | 14.08888254 | 25.04710954 | 41.48253269 | 67.69653852 | 109.0183446 | 168.1565528 | 261.1916757 | 360.5959441 | 470.0733496 | 474.0193859 |
| Israel | 0.021629675 | 0.034839102 | 0.074900193 | 0.181594595 | 0.46616164 | 1.072608695 | 1.913445922 | 3.844797945 | 6.99826145 | 12.57865531 | 21.73226761 | 35.68990143 | 55.45219207 | 82.88769246 | 150.4822835 | 235.4307032 | 375.8309964 | 516.4416161 | 691.5509259 |
| Italy | 0.018067006 | 0.024176407 | 0.049735465 | 0.136830228 | 0.335529868 | 0.85775896 | 1.672877602 | 3.339543942 | 7.041415417 | 13.84907232 | 23.91339953 | 39.51345796 | 60.94991079 | 91.7075252 | 141.3907526 | 214.8886939 | 307.0780307 | 380.7596959 | 491.3115098 |
| Jamaica | 0.046114029 | 0.054238501 | 0.176450157 | 0.481550311 | 0.910299508 | 2.089369197 | 2.838198436 | 5.986428072 | 9.981435399 | 17.86221304 | 30.01181284 | 51.90458514 | 74.98141364 | 106.3813355 | 143.5947558 | 170.8980525 | 216.6482828 | 235.3299144 | 272.8513826 |
| Japan | 0.023637282 | 0.020200661 | 0.072980988 | 0.200017093 | 0.428994372 | 1.05671178 | 2.148007251 | 4.120793949 | 7.812174627 | 14.82876427 | 26.25994015 | 43.43152452 | 62.44419332 | 88.02466809 | 124.4352759 | 184.7031561 | 290.9993793 | 435.897766 | 707.8725089 |
| Jordan | 0.032632115 | 0.043538227 | 0.121843101 | 0.258836669 | 0.448166077 | 1.121113973 | 2.322039589 | 4.287813049 | 7.292134368 | 14.11679278 | 22.19779076 | 35.83022728 | 52.81124473 | 73.33118774 | 114.1225357 | 153.0321033 | 217.0474078 | 276.3349763 | 353.9095431 |
| Kazakhstan | 0.014118529 | 0.018034762 | 0.135035599 | 0.282677602 | 0.584170846 | 1.205136105 | 2.247638298 | 3.943704471 | 7.609817916 | 13.55064067 | 24.62298081 | 43.35757553 | 67.7172766 | 92.15694458 | 125.0067738 | 152.1427966 | 135.4997585 | 151.1767503 | 167.9627396 |
| Kenya | 0.017252882 | 0.024081356 | 0.055574053 | 0.157312931 | 0.351456728 | 0.79996695 | 1.506097448 | 2.900861123 | 5.525560828 | 9.37286003 | 15.6981934 | 24.35366622 | 35.96431466 | 50.356591 | 64.67016984 | 91.29041715 | 117.2766721 | 120.5670702 | 121.6488129 |
| Kiribati | 0.045837711 | 0.051216292 | 0.365899866 | 0.662129167 | 1.406757222 | 2.257778641 | 3.233838691 | 5.251919664 | 9.642850686 | 14.21417509 | 21.42805676 | 30.9190182 | 41.43137475 | 54.94167345 | 82.21915103 | 114.2122139 | 158.9288737 | 118.2174154 | 233.752575 |
| Kuwait | 0.032998665 | 0.034830169 | 0.069853981 | 0.170515496 | 0.232298783 | 0.576376924 | 1.007688246 | 1.83541751 | 3.948797715 | 7.028296193 | 13.64172931 | 27.47464603 | 38.47303263 | 66.02332661 | 91.81954105 | 123.6555794 | 213.0560243 | 237.7494567 | 337.6892156 |
| Kyrgyzstan | 0.014126176 | 0.020695277 | 0.130706577 | 0.25610371 | 0.541203779 | 0.998647502 | 1.771283747 | 2.687061909 | 4.278019805 | 7.280684731 | 15.32188802 | 23.51077642 | 36.85498002 | 47.03981669 | 67.79821815 | 103.7782742 | 130.9083106 | 141.4430853 | 118.3538371 |
| Lao People's Democratic Republic | 0.049469868 | 0.077092666 | 0.281323131 | 0.57357602 | 0.989715192 | 2.0364395 | 3.266858895 | 5.706748662 | 9.567506193 | 17.04595296 | 25.50355334 | 40.32381332 | 57.71191068 | 79.22924777 | 106.5017631 | 140.3374809 | 172.9030939 | 175.9350069 | 219.9678659 |
| Latvia | 0.016022668 | 0.021104785 | 0.10092476 | 0.277943171 | 0.559985898 | 1.294364866 | 2.191578155 | 3.863642315 | 7.542431128 | 16.0506431 | 28.28374143 | 48.87689223 | 79.1165574 | 119.8409857 | 166.5744133 | 238.3905787 | 235.7763816 | 285.3569679 | 291.7108154 |
| Lebanon | 0.026803029 | 0.038703227 | 0.149898078 | 0.364611832 | 0.678751144 | 1.531174694 | 2.689558614 | 5.019191616 | 9.509087379 | 16.71266891 | 27.34235034 | 44.10512374 | 65.72760976 | 105.0204414 | 170.7753368 | 228.9296311 | 298.6679195 | 340.1385711 | 407.0271065 |
| Lesotho | 0.042619288 | 0.04845269 | 0.115114873 | 0.247627857 | 0.511891913 | 1.178147288 | 2.295483825 | 4.464655321 | 8.571868099 | 15.13082806 | 23.43680821 | 33.53311317 | 47.69743948 | 64.03237699 | 93.05789802 | 136.7813996 | 174.5184399 | 192.5078483 | 175.2812453 |
| Liberia | 0.027684711 | 0.035504387 | 0.056345742 | 0.196918456 | 0.246632963 | 0.585886856 | 1.354898983 | 1.762164723 | 3.523067022 | 6.739336718 | 9.713538773 | 17.10891382 | 25.7788538 | 38.75635181 | 63.64828154 | 95.82707785 | 104.8385471 | 121.1115724 | 140.7579379 |
| Libya | 0.019986323 | 0.02699933 | 0.104949878 | 0.277209377 | 0.562588383 | 1.51853423 | 2.864431672 | 5.35151512 | 10.17157127 | 16.86975267 | 25.69222834 | 39.84334174 | 55.08956611 | 82.46130245 | 92.5211402 | 111.3027631 | 145.2888911 | 174.2510427 | 218.9723369 |
| Lithuania | 0.01648519 | 0.029243166 | 0.132584578 | 0.229413676 | 0.557757114 | 1.297082541 | 2.336986895 | 3.906979621 | 8.014433261 | 14.52251055 | 28.86440282 | 49.19310411 | 78.76478104 | 108.2198951 | 155.6032161 | 209.9894309 | 241.6035267 | 281.1429449 | 303.6449293 |
| Luxembourg | 0.017172707 | 0.018954177 | 0.054750552 | 0.162311677 | 0.374902867 | 0.873298158 | 1.612704224 | 2.884467149 | 5.656705972 | 10.61252777 | 19.04563428 | 35.64084088 | 59.1272637 | 96.08766959 | 153.3927264 | 225.5479174 | 334.0928606 | 437.44636 | 591.562606 |
| Madagascar | 0.018777557 | 0.033246192 | 0.069083227 | 0.199198448 | 0.446215248 | 0.92707634 | 1.635744547 | 3.059068892 | 5.374813037 | 9.010226458 | 14.53313102 | 22.73353024 | 31.86681608 | 41.526676 | 51.97281506 | 72.9381755 | 94.1857255 | 101.6368177 | 108.503168 |
| Malawi | 0.024263456 | 0.030677961 | 0.057809916 | 0.139942781 | 0.294945282 | 0.601872469 | 1.049784413 | 1.986809579 | 3.711653892 | 6.269857566 | 10.58869966 | 17.23011601 | 26.99128806 | 39.58657785 | 55.44156978 | 70.76369846 | 79.18222707 | 83.78117961 | 97.04849886 |
| Malaysia | 0.022825954 | 0.045363167 | 0.173973965 | 0.380436734 | 0.826555291 | 1.902025514 | 3.191573605 | 5.348375713 | 9.788076962 | 17.81189764 | 30.3857868 | 49.37062031 | 78.22127321 | 122.3476109 | 182.8506642 | 291.1234231 | 392.0633507 | 350.2490558 | 432.5210248 |
| Maldives | 0.010366563 | 0.014857583 | 0.050148914 | 0.105099497 | 0.260168994 | 0.627077637 | 1.163284548 | 2.021034101 | 3.859601307 | 6.958447519 | 11.42819458 | 19.06453273 | 31.34722148 | 51.00769799 | 86.22731931 | 135.864972 | 176.8201389 | 167.4410523 | 192.2125937 |
| Mali | 0.038546505 | 0.04859547 | 0.075044678 | 0.217582493 | 0.293602864 | 0.723804892 | 1.632534875 | 2.399856565 | 4.761696277 | 9.130257376 | 13.227759 | 22.75910087 | 33.76191917 | 49.29930004 | 73.19225802 | 95.96568524 | 100.0946116 | 105.5528522 | 114.8904865 |
| Malta | 0.028352421 | 0.030021504 | 0.070525356 | 0.172039101 | 0.404918074 | 0.837755264 | 1.555271657 | 2.88485651 | 5.680858568 | 10.4645123 | 19.65697118 | 34.64514652 | 58.66635691 | 87.14666838 | 132.4540116 | 190.2248388 | 254.7499335 | 326.7934659 | 413.292591 |
| Marshall Islands | 0.031577439 | 0.039419813 | 0.280717024 | 0.521210677 | 1.390808046 | 2.325064904 | 3.560796918 | 5.459638855 | 10.4870422 | 15.77411447 | 24.93345281 | 34.62402236 | 48.85098403 | 63.5548112 | 88.46407142 | 127.5582346 | 197.8499524 | 151.7262829 | 356.3649258 |
| Mauritania | 0.034047165 | 0.04028688 | 0.057821862 | 0.18529473 | 0.230875379 | 0.567960891 | 1.336905924 | 1.830463666 | 3.757348979 | 7.513578551 | 10.9776792 | 19.74760493 | 31.13340864 | 48.88103555 | 83.39511723 | 128.0487102 | 144.6591762 | 164.9044845 | 191.0885582 |
| Mauritius | 0.021146526 | 0.028030022 | 0.220508524 | 0.326287961 | 0.613480901 | 1.456996109 | 2.790690383 | 4.595105741 | 7.783590235 | 16.71642297 | 21.32966394 | 35.46770971 | 57.77850033 | 77.02989854 | 101.6033034 | 146.113023 | 179.5574448 | 177.8558545 | 376.206024 |
| Mexico | 0.022035928 | 0.037151945 | 0.144071594 | 0.354428744 | 0.746343158 | 1.387235286 | 2.402683665 | 4.160038995 | 6.601658462 | 10.92987292 | 16.88168944 | 25.58945828 | 37.48779728 | 51.78670089 | 74.62302347 | 102.0405838 | 137.9679267 | 157.994206 | 181.1567754 |
| Micronesia (Federated States of) | 0.025690925 | 0.034921825 | 0.287441236 | 0.585152316 | 1.505351904 | 2.552516839 | 3.281592547 | 4.901732595 | 10.72916001 | 17.47815463 | 26.81549852 | 36.96930824 | 50.48925864 | 67.74917118 | 96.20339138 | 142.3630124 | 211.2560446 | 163.7591039 | 357.5082258 |
| Monaco | 0.024565519 | 0.033544163 | 0.090060866 | 0.291044938 | 0.713631723 | 1.666938396 | 2.974051256 | 5.532596622 | 10.25927523 | 19.21162868 | 33.36894474 | 55.55228079 | 87.05025809 | 139.2919972 | 222.0453504 | 340.9532547 | 494.1171452 | 648.0203858 | 812.8001408 |
| Mongolia | 0.010605674 | 0.011337808 | 0.056903887 | 0.373455774 | 0.71796939 | 1.554889523 | 2.696859434 | 4.021873917 | 5.891963971 | 11.8303682 | 16.71679373 | 24.73815666 | 41.4701258 | 52.30436119 | 72.1181601 | 99.56535319 | 128.119382 | 182.0588488 | 222.5569483 |
| Montenegro | 0.021546127 | 0.03411492 | 0.089121595 | 0.297517139 | 0.658029774 | 1.219602547 | 2.314639337 | 3.9451817 | 7.765015152 | 16.56872796 | 31.81945124 | 51.27760852 | 79.37106861 | 110.6908422 | 158.3191129 | 203.5268171 | 246.5470952 | 266.574604 | 292.8661115 |
| Morocco | 0.022752573 | 0.027257119 | 0.067194439 | 0.154204575 | 0.30324698 | 0.734866012 | 1.405659758 | 2.596078794 | 5.400119631 | 10.38943599 | 17.39839847 | 27.83993215 | 36.92844061 | 54.73647009 | 70.72382086 | 88.07180792 | 106.1195974 | 120.5889613 | 132.9844365 |
| Mozambique | 0.013989086 | 0.018734207 | 0.05174923 | 0.149907647 | 0.352974476 | 0.777440703 | 1.470858482 | 2.93625593 | 5.395123296 | 8.859332088 | 14.86500903 | 24.12881812 | 36.57313278 | 52.83858393 | 78.31760908 | 107.439438 | 130.8152171 | 135.6001079 | 135.2526359 |
| Myanmar | 0.048291536 | 0.081455057 | 0.323934619 | 0.619784525 | 0.993158416 | 2.035805036 | 3.235489371 | 5.368392047 | 9.10403632 | 16.43668486 | 24.01354762 | 37.25666185 | 54.1881163 | 77.08058773 | 105.2256231 | 137.3496951 | 166.5808074 | 170.2527192 | 214.6932436 |
| Namibia | 0.029208358 | 0.030160825 | 0.073465658 | 0.153310757 | 0.307878698 | 0.695810001 | 1.38710809 | 2.695731437 | 5.31474052 | 9.541586809 | 14.92466467 | 22.56859312 | 35.10500512 | 52.00526508 | 80.29757316 | 114.9450563 | 136.5060201 | 132.1145529 | 117.3994307 |
| Nauru | 0.051919472 | 0.061034662 | 0.424321008 | 0.803499567 | 1.924925234 | 3.232470369 | 4.897016332 | 7.757321575 | 14.23108172 | 21.68818464 | 32.71230152 | 46.60208044 | 63.25710602 | 84.08382582 | 120.6940785 | 171.5857343 | 275.4907238 | 211.667577 | 441.6670906 |
| Nepal | 0.017454842 | 0.019795479 | 0.056853883 | 0.126813965 | 0.203619674 | 0.490406763 | 0.877823812 | 1.664511322 | 3.586923391 | 5.624534276 | 8.586941902 | 13.6056119 | 21.18768578 | 32.65273192 | 48.57470049 | 71.38947557 | 88.78877297 | 93.84922326 | 97.69436992 |
| Netherlands | 0.020064012 | 0.027783989 | 0.052918932 | 0.137046475 | 0.361508568 | 0.920788932 | 1.929623384 | 4.111977759 | 8.497825088 | 16.66465197 | 30.07666356 | 51.38723179 | 83.57807134 | 126.6336123 | 188.1120489 | 294.1105195 | 448.180097 | 645.2169885 | 821.5708676 |
| New Zealand | 0.028778936 | 0.029145634 | 0.088620822 | 0.272856912 | 0.682615855 | 1.435449832 | 2.479920244 | 4.901715829 | 9.202296197 | 16.42001946 | 29.05162346 | 45.42399743 | 75.52994803 | 124.8085861 | 190.0311619 | 274.2712683 | 392.8178976 | 492.569357 | 565.2311026 |
| Nicaragua | 0.036633508 | 0.046327332 | 0.206548343 | 0.302971293 | 0.490078495 | 0.811622117 | 1.4535096 | 2.831675984 | 5.197263878 | 9.823048851 | 15.86178897 | 26.02024963 | 39.59260868 | 61.61628268 | 104.2787298 | 154.190584 | 198.6692997 | 231.2297372 | 280.4571814 |
| Niger | 0.029167434 | 0.03442055 | 0.048845116 | 0.150177803 | 0.199778029 | 0.48079353 | 1.118072226 | 1.502952428 | 3.00661653 | 6.075704232 | 8.438503527 | 14.6643175 | 22.03782033 | 33.5630429 | 54.31713899 | 78.81284604 | 82.2849592 | 95.49117421 | 109.4919587 |
| Nigeria | 0.03101978 | 0.033415067 | 0.041696211 | 0.126815588 | 0.209271625 | 0.528725314 | 1.226754946 | 1.85271271 | 3.910085039 | 7.674640535 | 11.74734768 | 20.83058589 | 33.32413439 | 53.03667547 | 91.41893728 | 130.9011751 | 137.5071906 | 146.8518029 | 162.1790113 |
| Niue | 0.04434724 | 0.052075667 | 0.356807694 | 0.534065955 | 1.150087209 | 1.827134977 | 2.79932835 | 4.497925495 | 9.045232826 | 15.00732331 | 24.59545917 | 37.75409958 | 54.82521983 | 73.86286852 | 108.3912187 | 157.0721598 | 242.8708523 | 192.9335977 | 414.1890041 |
| North Macedonia | 0.031257994 | 0.036734107 | 0.089849469 | 0.312209412 | 0.717816643 | 1.458388382 | 3.402569819 | 5.529382567 | 11.81688316 | 21.36441742 | 41.89450628 | 62.66743272 | 102.969404 | 141.0339818 | 218.5092559 | 259.6712847 | 286.6099904 | 306.7707098 | 352.6621987 |
| Northern Mariana Islands | 0.044120129 | 0.053595846 | 0.3716442 | 0.59651309 | 1.270523636 | 2.231617552 | 3.474814763 | 5.102341197 | 13.22249846 | 18.19914632 | 34.15599809 | 47.24752791 | 73.38087543 | 97.03620873 | 146.258178 | 202.1590302 | 356.0948164 | 290.9503948 | 785.9427361 |
| Norway | 0.019672015 | 0.025238937 | 0.056445826 | 0.163295934 | 0.411832514 | 0.922033594 | 1.922267761 | 3.550994311 | 7.58276485 | 14.23194165 | 24.46816506 | 46.35484786 | 72.65096578 | 117.8448019 | 189.752724 | 278.5277815 | 414.8746018 | 534.2862166 | 677.6020919 |
| Oman | 0.02561196 | 0.031116247 | 0.066568014 | 0.147146471 | 0.228945801 | 0.540848832 | 0.963785102 | 1.826687848 | 3.369634535 | 6.446174645 | 12.24109651 | 21.82922737 | 41.29304178 | 68.41895012 | 106.2582651 | 163.7151764 | 178.1225087 | 201.2619178 | 216.1534431 |
| Pakistan | 0.045623197 | 0.041771072 | 0.099068005 | 0.281338832 | 0.579476474 | 1.323483284 | 2.220701774 | 3.759122018 | 6.942703086 | 10.63607691 | 16.01342713 | 24.95738563 | 34.99168462 | 48.57482312 | 66.90756426 | 89.53123208 | 104.1069392 | 113.1554743 | 125.9235573 |
| Palau | 0.02597057 | 0.030656071 | 0.182559615 | 0.253310115 | 0.776314875 | 1.378958962 | 2.496305185 | 4.042896221 | 8.048086407 | 13.10467503 | 23.13617405 | 33.52684169 | 51.36067486 | 72.13989004 | 115.1376838 | 189.3018396 | 274.724293 | 216.3811959 | 437.8990171 |
| Palestine | 0.040379788 | 0.056223335 | 0.225142996 | 0.461985229 | 0.836528886 | 1.418711294 | 2.84025634 | 5.641819945 | 11.4061654 | 22.72580524 | 34.76029651 | 52.37025961 | 88.70073548 | 132.5866853 | 191.385141 | 210.3468192 | 261.0423696 | 260.6697959 | 342.5802349 |
| Panama | 0.025999017 | 0.041980687 | 0.141190243 | 0.354422833 | 0.658664043 | 1.186999717 | 1.915782577 | 3.529743268 | 6.949329279 | 11.25170765 | 18.56031484 | 28.05065691 | 44.2658075 | 66.0988221 | 89.01451187 | 125.1283093 | 187.9572964 | 210.3716993 | 299.0797801 |
| Papua New Guinea | 0.040004464 | 0.04178617 | 0.232792579 | 0.324835415 | 0.73476529 | 1.165943666 | 1.830432546 | 2.91629157 | 5.704333424 | 9.308187682 | 14.84236563 | 21.67735466 | 31.14791933 | 41.32760405 | 56.99070597 | 78.29370447 | 117.0487981 | 85.82438347 | 177.6123401 |
| Paraguay | 0.030055024 | 0.065029595 | 0.213290578 | 0.364613628 | 0.68241734 | 1.349883754 | 2.390369227 | 4.158050471 | 8.108986299 | 13.61817648 | 20.82741916 | 31.25555226 | 46.26185316 | 68.28319538 | 107.5163802 | 156.4869987 | 196.8713078 | 214.8892143 | 242.1249246 |
| Peru | 0.033189118 | 0.048793102 | 0.189907234 | 0.343624181 | 0.655916522 | 1.075384372 | 1.691732597 | 2.919246023 | 4.99357815 | 8.209729209 | 13.5038384 | 22.49253571 | 36.42418414 | 55.89474226 | 85.93500891 | 120.1513203 | 171.1233562 | 204.4479758 | 265.5718631 |
| Philippines | 0.080095085 | 0.108958488 | 0.316641511 | 0.75397182 | 1.449095405 | 2.926419772 | 4.643971868 | 7.319079862 | 12.11612902 | 20.03099239 | 30.78432217 | 46.58146617 | 67.84141662 | 87.90741141 | 110.1920838 | 138.2956658 | 168.8053091 | 177.8293544 | 194.3644395 |
| Poland | 0.016739821 | 0.025482608 | 0.092306543 | 0.206686925 | 0.462639013 | 1.147112458 | 2.583738556 | 5.069647693 | 10.96209351 | 22.70322542 | 41.74243751 | 70.38391974 | 111.6845147 | 160.980377 | 230.4790268 | 297.4890224 | 385.3380246 | 446.0624443 | 523.3778502 |
| Portugal | 0.024254191 | 0.030524855 | 0.069653219 | 0.246993964 | 0.536994111 | 1.246806579 | 2.634468458 | 4.977375603 | 10.3049024 | 18.64787664 | 31.44418399 | 50.902993 | 75.84997561 | 112.5236499 | 174.7666143 | 262.526751 | 381.2462465 | 506.0486225 | 650.0957546 |
| Puerto Rico | 0.013049972 | 0.01287887 | 0.084128473 | 0.270754614 | 0.607689516 | 1.530830576 | 3.026562518 | 5.949910734 | 10.09644461 | 18.63652465 | 31.1288446 | 43.80418099 | 64.35913702 | 83.58382294 | 121.9056955 | 165.4001086 | 248.6606361 | 294.6483403 | 400.2719841 |
| Qatar | 0.022151997 | 0.028237914 | 0.076084592 | 0.163282174 | 0.228524151 | 0.54459568 | 1.157384548 | 1.77053552 | 3.840556556 | 6.508842597 | 12.70605258 | 22.71651834 | 47.75407755 | 98.07475185 | 194.8147436 | 321.9920365 | 413.6271046 | 408.2917295 | 393.2704392 |
| Republic of Korea | 0.023476496 | 0.021468414 | 0.076866319 | 0.17845185 | 0.443940826 | 1.004163339 | 1.885364062 | 3.543325243 | 6.149485132 | 11.4060195 | 18.24602056 | 28.71807145 | 45.27567867 | 75.14089771 | 123.6758913 | 200.6543188 | 308.9480998 | 405.2808081 | 507.6019533 |
| Republic of Moldova | 0.047074727 | 0.060815484 | 0.190028891 | 0.434328351 | 0.813482199 | 1.8639748 | 2.958034337 | 5.186146685 | 10.66967996 | 20.79425603 | 41.09200078 | 70.14293318 | 105.1892418 | 128.8067354 | 142.3537381 | 127.7218335 | 118.702883 | 120.4523728 | 96.7004558 |
| Romania | 0.063071969 | 0.088337039 | 0.240799283 | 0.427112056 | 0.917823796 | 1.714736386 | 3.329654385 | 5.96443037 | 12.46275833 | 23.73557155 | 42.26005871 | 64.61123632 | 95.36928677 | 137.6163411 | 186.027876 | 213.8071654 | 216.7720449 | 172.7289376 | 161.3782156 |
| Russian Federation | 0.018175536 | 0.025895264 | 0.098459106 | 0.273030492 | 0.695250086 | 1.710394108 | 3.117392847 | 5.481184673 | 10.02129901 | 18.39010118 | 32.23929831 | 54.53320097 | 83.86023692 | 123.8719023 | 168.4853968 | 203.6944864 | 212.5546074 | 261.3622532 | 324.0822864 |
| Rwanda | 0.024241667 | 0.03702126 | 0.083320707 | 0.225994511 | 0.475439894 | 1.011599832 | 1.768132863 | 3.230996078 | 5.926949834 | 10.11731767 | 16.58892496 | 26.07407661 | 38.40179244 | 52.52982503 | 69.11688372 | 99.89268436 | 127.4579676 | 137.2885024 | 150.0447069 |
| Saint Kitts and Nevis | 0.039611156 | 0.042195512 | 0.192069271 | 0.328151685 | 0.446081257 | 0.876229363 | 1.665492479 | 3.721549865 | 8.143888459 | 17.82682447 | 32.1185779 | 52.21300272 | 79.94119788 | 116.3798917 | 170.8586523 | 228.0572667 | 286.9736579 | 327.5360978 | 325.2098824 |
| Saint Lucia | 0.030732823 | 0.03246393 | 0.13509419 | 0.301492791 | 0.60934564 | 1.387468636 | 2.231770579 | 4.364919692 | 7.499794805 | 12.2266317 | 19.41849917 | 31.27729634 | 44.32755305 | 69.29066003 | 95.5614167 | 136.2495766 | 221.6228198 | 326.8276917 | 374.763888 |
| Saint Vincent and the Grenadines | 0.02341567 | 0.051648354 | 0.187545262 | 0.340904734 | 0.725234354 | 1.566633367 | 2.704311536 | 5.074700052 | 10.00349617 | 16.5332638 | 24.20512611 | 35.26526817 | 53.03125385 | 78.83380339 | 123.4195492 | 177.3606535 | 250.9385421 | 327.788244 | 335.0517537 |
| Samoa | 0.022359225 | 0.023035614 | 0.106520915 | 0.189815214 | 0.578660863 | 1.104990639 | 2.156330597 | 3.671871129 | 7.456845024 | 12.28716681 | 20.26648902 | 29.92454851 | 43.97643851 | 59.37294736 | 81.9071601 | 106.8525676 | 150.2609666 | 113.3973059 | 178.3195596 |
| San Marino | 0.026650378 | 0.028944562 | 0.063998234 | 0.217978298 | 0.549810896 | 1.184458283 | 2.098971186 | 3.816332377 | 7.716482516 | 14.90053768 | 26.46251878 | 45.76775098 | 74.38681655 | 121.2365448 | 193.6691754 | 304.2683727 | 471.7707682 | 636.9345471 | 843.7192485 |
| Sao Tome and Principe | 0.070174538 | 0.091394283 | 0.234626222 | 0.742633322 | 0.452595851 | 1.181202258 | 2.762143968 | 3.225308871 | 6.691528479 | 13.8608111 | 20.08481365 | 40.18937248 | 62.1915279 | 95.85524062 | 146.4682832 | 197.5207724 | 248.0644251 | 302.4249738 | 349.3860502 |
| Saudi Arabia | 0.015125564 | 0.020640818 | 0.066629894 | 0.191291961 | 0.459435274 | 1.126852531 | 2.12239194 | 4.08629744 | 7.41877409 | 12.55711989 | 18.03482941 | 26.44866863 | 38.05773185 | 56.91415157 | 80.61608374 | 108.2447928 | 140.4029154 | 149.8849791 | 188.4474622 |
| Senegal | 0.036044429 | 0.045613107 | 0.077565606 | 0.262548745 | 0.304296023 | 0.727621148 | 1.671715915 | 2.24978011 | 4.5056859 | 8.750703375 | 12.79381883 | 22.45252136 | 34.0244115 | 52.4319765 | 83.66580504 | 122.7911975 | 133.7191364 | 153.2338391 | 173.0331909 |
| Serbia | 0.016243457 | 0.023145038 | 0.073318989 | 0.249848277 | 0.719613935 | 1.586412333 | 3.384231826 | 7.156634739 | 12.90568149 | 26.40899034 | 48.1739605 | 73.02990917 | 116.4371678 | 151.4330483 | 208.3271113 | 320.9658802 | 388.0669553 | 431.591229 | 456.8114611 |
| Seychelles | 0.034182159 | 0.057039416 | 0.26652928 | 0.743752497 | 1.440427815 | 3.161171086 | 4.843331285 | 9.075433619 | 15.9611498 | 27.29320551 | 40.94521643 | 64.92604689 | 102.5631071 | 137.7716889 | 221.8870804 | 301.8788716 | 413.0728422 | 526.2934657 | 737.5519557 |
| Sierra Leone | 0.043965475 | 0.047618529 | 0.06437677 | 0.209395182 | 0.263629518 | 0.638837278 | 1.462133321 | 1.960424218 | 3.791241363 | 7.263868974 | 10.2104205 | 18.2634662 | 27.16316752 | 40.4912154 | 66.21951185 | 99.44896506 | 103.2448442 | 119.7773204 | 139.5491584 |
| Singapore | 0.020509622 | 0.034583441 | 0.097099881 | 0.179661663 | 0.317976601 | 0.670746197 | 1.229682199 | 2.480740791 | 5.530773846 | 12.03453859 | 22.23759204 | 34.71897442 | 57.01004422 | 89.91798305 | 139.4023236 | 203.5362369 | 277.2057877 | 388.1299699 | 546.923762 |
| Slovakia | 0.020728047 | 0.02600499 | 0.070561263 | 0.232388492 | 0.625260757 | 1.404439918 | 2.792041854 | 5.454244167 | 12.3795586 | 25.35471928 | 44.46800191 | 79.41520708 | 120.969101 | 168.8981131 | 245.5760971 | 323.5633295 | 385.9159292 | 422.6704148 | 432.5261378 |
| Slovenia | 0.011543704 | 0.025294177 | 0.059290506 | 0.176633459 | 0.403032906 | 0.905960385 | 1.917116663 | 3.591143095 | 7.553216846 | 17.35840782 | 28.63321871 | 51.41332222 | 81.04632381 | 131.7775334 | 193.0821112 | 271.5892805 | 324.8144381 | 390.9380685 | 510.6735115 |
| Solomon Islands | 0.027163147 | 0.042104049 | 0.331217547 | 0.608367601 | 1.613657335 | 2.556680441 | 3.960306025 | 5.942727637 | 11.15736474 | 16.66414599 | 24.14149514 | 31.15633532 | 41.92923307 | 51.91063034 | 70.3399765 | 90.54786784 | 129.0966171 | 88.06459224 | 219.0821629 |
| Somalia | 0.015327399 | 0.02385822 | 0.048681123 | 0.126516767 | 0.276892063 | 0.579460292 | 1.10790856 | 2.260058335 | 4.122825738 | 7.036115791 | 11.32883741 | 16.7444552 | 23.10447511 | 29.47712284 | 35.77868599 | 47.66405466 | 57.98674406 | 60.74821085 | 62.89656092 |
| South Africa | 0.040707319 | 0.014611959 | 0.062990287 | 0.215619995 | 0.595830802 | 1.436139748 | 2.26944857 | 3.519916466 | 5.640466904 | 11.10349605 | 19.21029373 | 30.01215445 | 46.06046682 | 61.01333062 | 88.3702274 | 149.4404435 | 199.9826283 | 233.1726614 | 235.9635347 |
| South Sudan | 0.029593918 | 0.043120301 | 0.080581891 | 0.214737025 | 0.474937646 | 1.023870127 | 1.840455444 | 3.38396873 | 6.230407788 | 11.04774103 | 18.29701538 | 29.75184868 | 44.34298989 | 62.24874736 | 82.59982026 | 115.4790171 | 142.3012997 | 148.9317889 | 160.2572177 |
| Spain | 0.025969569 | 0.029169831 | 0.055548177 | 0.155603112 | 0.377044118 | 0.916689515 | 1.796222894 | 3.620870661 | 7.825052671 | 16.79247666 | 28.97811488 | 46.58348977 | 70.83156886 | 103.8171381 | 165.8889941 | 251.1807708 | 383.6337003 | 513.4753616 | 650.8447874 |
| Sri Lanka | 0.015779656 | 0.021660784 | 0.088181962 | 0.196144457 | 0.305086438 | 0.627881453 | 1.127429027 | 1.975939592 | 3.670804073 | 6.326258302 | 9.657961588 | 15.67609019 | 24.90618719 | 39.05444987 | 54.88883518 | 82.94672799 | 103.8403454 | 145.7524157 | 186.7311769 |
| Sudan | 0.026548969 | 0.030980797 | 0.078614597 | 0.190748805 | 0.394668433 | 0.929834388 | 1.626641883 | 2.873266116 | 5.03897468 | 8.583528497 | 13.10686204 | 20.93091306 | 30.32609332 | 44.74010869 | 59.87459588 | 78.12237305 | 91.95334102 | 94.26438168 | 105.3131834 |
| Suriname | 0.04008531 | 0.062678085 | 0.268883654 | 0.431597214 | 0.959335913 | 2.02935169 | 3.668974134 | 5.862761425 | 9.670631149 | 17.82113696 | 30.10746248 | 44.89313234 | 68.98574467 | 98.89619246 | 144.6298104 | 184.9953432 | 231.9169359 | 254.7406349 | 269.0879938 |
| Sweden | 0.022402971 | 0.030476899 | 0.066027968 | 0.212438805 | 0.458229752 | 0.862584045 | 1.635297574 | 3.462728528 | 7.033568228 | 11.93937032 | 19.89047365 | 37.64141764 | 59.87373207 | 94.63378246 | 154.244157 | 226.1640659 | 320.9037536 | 401.1712699 | 423.5619476 |
| Switzerland | 0.018526073 | 0.025531364 | 0.05373124 | 0.145219205 | 0.285476124 | 0.666072885 | 1.163937775 | 2.503736974 | 5.077565208 | 9.786618862 | 15.94931839 | 28.77005582 | 45.88044673 | 68.27072059 | 102.8238661 | 166.6307454 | 246.3369088 | 305.3622052 | 349.9033267 |
| Syrian Arab Republic | 0.064988307 | 0.078547919 | 0.156925884 | 0.260323248 | 0.514740646 | 0.899088548 | 1.354211584 | 2.218934244 | 3.916422219 | 6.350981841 | 10.02111374 | 16.63963305 | 24.00973876 | 35.96617195 | 52.43829063 | 77.21007012 | 112.7290081 | 117.0578237 | 113.1191271 |
| Taiwan (Province of China) | 0.027142141 | 0.035281327 | 0.249229984 | 0.498073157 | 1.097246844 | 3.076777987 | 6.427745835 | 10.15290594 | 16.71515529 | 26.75665357 | 43.29258173 | 65.87653274 | 96.06835588 | 149.7690326 | 230.592807 | 335.910217 | 442.9512104 | 501.4682252 | 660.5315715 |
| Tajikistan | 0.037187996 | 0.043294165 | 0.269412474 | 0.670208416 | 1.059555 | 1.889504099 | 2.813333733 | 4.097565258 | 5.220108004 | 8.08034815 | 13.99822989 | 23.61563461 | 41.09995766 | 65.14600962 | 103.8016825 | 151.9108784 | 131.9800348 | 131.8350739 | 117.1380506 |
| Thailand | 0.025653686 | 0.046567761 | 0.171794965 | 0.367327036 | 0.803731586 | 1.913012166 | 2.726541157 | 4.241122799 | 7.291082029 | 11.7287127 | 17.80293302 | 27.72533173 | 41.99767654 | 61.15504958 | 85.69360094 | 121.0947973 | 153.1685174 | 199.0405918 | 299.9761198 |
| Timor-Leste | 0.038478553 | 0.059894871 | 0.232462436 | 0.446055494 | 0.718224043 | 1.502990256 | 2.419265544 | 4.248551841 | 7.72003597 | 14.86550167 | 22.98829321 | 36.58020137 | 53.68323426 | 75.52829258 | 102.8610716 | 134.1811485 | 169.615468 | 173.9015861 | 218.1704767 |
| Togo | 0.032900988 | 0.041959485 | 0.073703635 | 0.252096123 | 0.284187628 | 0.702070646 | 1.651969993 | 2.250777913 | 4.472163272 | 8.409391185 | 12.17305496 | 21.00626657 | 31.37876091 | 45.14978059 | 73.13236845 | 111.3637367 | 115.4089176 | 134.6287397 | 155.0817844 |
| Tokelau | 0.01828909 | 0.026884857 | 0.213035572 | 0.38868191 | 1.031788167 | 1.712374689 | 2.542350188 | 4.096427955 | 7.664268021 | 12.46848704 | 20.39952509 | 28.14567544 | 41.59383511 | 55.47478026 | 85.69140976 | 124.6521359 | 199.9511185 | 158.1670266 | 370.0501308 |
| Tonga | 0.015607519 | 0.018651691 | 0.127688998 | 0.185171935 | 0.449322075 | 0.783820076 | 1.298053709 | 2.048461494 | 4.33298374 | 7.358122012 | 12.71708609 | 18.05093631 | 26.10684367 | 34.73199105 | 54.3304647 | 86.20155085 | 137.7071438 | 118.2893422 | 245.2398717 |
| Trinidad and Tobago | 0.039322607 | 0.041101109 | 0.206670987 | 0.489506402 | 0.804632173 | 2.205451811 | 3.218429588 | 4.950683439 | 7.817662089 | 14.44933836 | 25.69115733 | 40.49870005 | 56.78943647 | 81.47492546 | 123.9425148 | 151.6673742 | 207.0777206 | 255.368143 | 303.6665473 |
| Tunisia | 0.027220286 | 0.032017759 | 0.06477003 | 0.176157619 | 0.363122899 | 0.948827642 | 1.660369308 | 3.043654688 | 5.324234976 | 9.217364946 | 16.01063275 | 26.27093381 | 38.65798802 | 58.49454478 | 77.77265575 | 126.9719225 | 171.6608023 | 196.8494226 | 227.2539908 |
| Turkey | 0.049663743 | 0.054643308 | 0.13423093 | 0.316542654 | 0.694403695 | 1.385536578 | 2.491642162 | 4.387636228 | 7.586371887 | 13.27074005 | 21.72741585 | 35.71509769 | 52.49688358 | 83.99300562 | 115.546982 | 161.0934838 | 205.2496907 | 213.9696826 | 242.2287419 |
| Turkmenistan | 0.017860745 | 0.02300327 | 0.189080488 | 0.470697449 | 0.815563524 | 1.252126856 | 1.977569927 | 3.154528845 | 4.911549866 | 7.395520059 | 12.19108018 | 19.76495681 | 27.21369354 | 44.11269101 | 60.72007847 | 89.20762586 | 86.68135702 | 98.8063276 | 101.0821518 |
| Tuvalu | 0.024734609 | 0.031248316 | 0.238676477 | 0.461181543 | 1.158911443 | 1.98365805 | 2.985614605 | 4.642388669 | 8.618600302 | 13.09823572 | 20.86027408 | 29.55053026 | 42.30588973 | 55.9464418 | 81.41789213 | 120.6119597 | 187.0796264 | 146.7233228 | 340.7070558 |
| Uganda | 0.028061244 | 0.048293655 | 0.118662957 | 0.307571472 | 0.642152271 | 1.365528451 | 2.41373557 | 4.461870775 | 8.120584722 | 13.71478097 | 22.73155943 | 35.87519626 | 53.34727512 | 69.40549681 | 90.19504322 | 123.3631324 | 151.0234011 | 164.6336162 | 179.7385276 |
| Ukraine | 0.031309448 | 0.056231216 | 0.356098401 | 0.631397595 | 1.157134589 | 2.183218002 | 4.109286893 | 7.836348694 | 14.20448528 | 25.89256179 | 45.64971013 | 72.31175661 | 102.4133845 | 130.6190806 | 155.5413698 | 140.3262205 | 135.9558813 | 136.2238039 | 128.9880502 |
| United Arab Emirates | 0.010858498 | 0.01419503 | 0.041657232 | 0.168111811 | 0.335021605 | 0.86308171 | 1.585448453 | 3.09952806 | 6.554751485 | 11.87047907 | 24.33671301 | 38.26935719 | 64.63493255 | 101.4540514 | 126.3111477 | 244.3003547 | 430.8389897 | 541.7527742 | 674.0037111 |
| United Kingdom | 0.020786844 | 0.025928815 | 0.058240562 | 0.186198013 | 0.560261244 | 1.276340763 | 2.170179683 | 4.019057698 | 7.665989274 | 14.31957288 | 24.89652843 | 42.19101847 | 64.49625917 | 100.7510238 | 157.5452636 | 250.605026 | 373.0140429 | 526.5890246 | 716.1508637 |
| United Republic of Tanzania | 0.029280262 | 0.044940547 | 0.087489855 | 0.22949711 | 0.504284076 | 1.07240824 | 1.887087924 | 3.493562895 | 6.321515516 | 11.17444987 | 18.43987422 | 28.8893056 | 42.49146821 | 58.04675163 | 74.66891351 | 105.356106 | 130.150205 | 142.6826337 | 156.8996341 |
| United States of America | 0.020484874 | 0.025314659 | 0.066542425 | 0.217249652 | 0.550336003 | 1.365885787 | 2.63328197 | 5.321984603 | 9.977005538 | 17.8596196 | 27.82665424 | 41.15890952 | 55.68363284 | 79.83016654 | 117.1705325 | 171.4864528 | 244.4678489 | 321.7473283 | 416.2989859 |
| United States Virgin Islands | 0.036706515 | 0.045070291 | 0.221654352 | 0.417156128 | 0.729524161 | 1.76195253 | 3.652561341 | 7.649963753 | 14.72279584 | 27.56671575 | 46.09566883 | 72.43295917 | 107.3230427 | 156.3436846 | 231.5460887 | 324.3038549 | 448.7114965 | 550.7596406 | 613.9354584 |
| Uruguay | 0.02256681 | 0.041606225 | 0.185509515 | 0.501153833 | 0.907402091 | 1.97776365 | 3.628476705 | 6.184722038 | 11.60194912 | 21.82730007 | 38.06254183 | 64.51039218 | 101.5127284 | 162.2312644 | 234.281234 | 335.3980506 | 492.3123969 | 615.8785635 | 787.5129919 |
| Uzbekistan | 0.025908863 | 0.030592882 | 0.194596461 | 0.450435164 | 0.789251015 | 1.589503812 | 2.305649847 | 3.409733065 | 5.6998183 | 8.940763096 | 14.73693807 | 25.23034357 | 31.87962297 | 54.00283207 | 92.92307084 | 171.7836074 | 202.2299627 | 181.241428 | 165.6807826 |
| Vanuatu | 0.027816644 | 0.032466148 | 0.233133788 | 0.408632273 | 0.979228958 | 1.666162665 | 2.555530663 | 4.071882485 | 7.6496912 | 11.9027207 | 18.49309797 | 26.31093709 | 37.29251747 | 48.35744131 | 68.07371344 | 95.90941237 | 151.1420065 | 114.9921752 | 274.9196514 |
| Venezuela (Bolivarian Republic of) | 0.022307823 | 0.041783024 | 0.244683785 | 0.548306685 | 0.877051289 | 1.416249558 | 2.305083921 | 3.838395408 | 6.962806587 | 12.72570864 | 20.73570516 | 32.83955172 | 47.7224251 | 70.99927364 | 102.3801593 | 129.9188761 | 143.1019773 | 152.8620425 | 189.1395311 |
| Viet Nam | 0.020839382 | 0.031156868 | 0.157734586 | 0.318364553 | 0.613360554 | 1.470780078 | 2.916374708 | 6.091097276 | 12.22564294 | 23.48653347 | 37.32331571 | 58.24404638 | 79.36738106 | 105.8235073 | 135.1042565 | 179.320886 | 228.0279519 | 221.3098102 | 262.5713391 |
| Yemen | 0.020396389 | 0.025048315 | 0.04780495 | 0.126448761 | 0.298923843 | 0.745228336 | 1.439696628 | 2.866458041 | 5.243637971 | 8.776940582 | 13.28468416 | 20.39120231 | 28.49113784 | 41.03624598 | 54.03047466 | 69.42756775 | 82.65859474 | 86.85816262 | 97.74722568 |
| Zambia | 0.028864229 | 0.044728593 | 0.120063389 | 0.327092661 | 0.727332883 | 1.576469935 | 2.84688412 | 5.403223121 | 9.658440816 | 16.20914802 | 25.95099465 | 39.59717649 | 55.80749726 | 73.36574336 | 93.20225495 | 130.0931358 | 170.8523434 | 183.9158827 | 198.2315805 |
| Zimbabwe | 0.030455062 | 0.042637351 | 0.128846469 | 0.300764255 | 0.670497218 | 1.507745176 | 2.840026437 | 5.299873322 | 9.632974983 | 15.80366245 | 23.37986647 | 36.24500866 | 52.68380833 | 76.89170874 | 113.0268227 | 145.9858706 | 183.1823259 | 196.4041759 | 184.359591 |

**Table S7** Age distribution of DALYs rate (per 100,000) for Colorectal cancer in different countries in 2019.

| location | 5-9 | 10-14 | 15-19 | 20-24 | 25-29 | 30-34 | 35-39 | 40-44 | 45-49 | 50-54 | 55-59 | 60-64 | 65-69 | 70-74 | 75-79 | 80-84 | 85-89 | 90-94 | ≥95 |
| --- | --- | --- | --- | --- | --- | --- | --- | --- | --- | --- | --- | --- | --- | --- | --- | --- | --- | --- | --- |
| Afghanistan | 2.021438507 | 2.358822253 | 6.734511468 | 16.26159506 | 33.89720959 | 77.00729724 | 131.534252 | 214.5448896 | 339.4192911 | 482.2460472 | 619.5213373 | 749.1157523 | 836.7854057 | 934.1808517 | 956.4145035 | 931.7435228 | 882.7964903 | 724.461385 | 618.4825489 |
| Albania | 11.04209759 | 8.15660008 | 15.31970841 | 41.91056729 | 69.76355851 | 97.57757353 | 124.2372133 | 151.9358606 | 211.6487623 | 320.2334753 | 402.8351857 | 636.1091663 | 812.9584732 | 1125.233249 | 1342.277453 | 1456.462971 | 1316.190324 | 1167.634102 | 1024.786579 |
| Algeria | 2.116102696 | 2.575775171 | 4.947494664 | 10.95333515 | 20.24792795 | 45.56168695 | 77.9215134 | 126.5261369 | 196.692171 | 286.2430644 | 394.9179272 | 560.562376 | 681.817173 | 821.8939504 | 1010.703505 | 1153.753261 | 1731.475897 | 1554.704247 | 1095.433355 |
| American Samoa | 3.688093443 | 4.114301106 | 29.83489829 | 44.78918943 | 91.57850265 | 138.3708705 | 184.3249081 | 263.0756418 | 478.3260808 | 693.7531995 | 975.5556637 | 1252.395738 | 1522.037481 | 1731.11217 | 1991.939809 | 2260.284799 | 2865.769791 | 1781.927077 | 3307.015764 |
| Andorra | 1.564119637 | 1.819435719 | 4.306919221 | 15.00709389 | 35.72283461 | 77.92279461 | 135.8153088 | 237.7964794 | 417.7397896 | 714.0819505 | 1096.462548 | 1601.567645 | 2131.192604 | 2776.13365 | 3421.508453 | 3969.32431 | 4427.054185 | 4288.20857 | 3922.594793 |
| Angola | 2.731421831 | 2.883977118 | 7.962757948 | 16.62317722 | 28.68611282 | 58.88551939 | 94.8101478 | 157.3233645 | 269.7745115 | 433.7534835 | 616.2994406 | 829.2203088 | 984.2383501 | 1121.836481 | 1220.444651 | 1266.335493 | 1229.115525 | 1090.174413 | 982.5554028 |
| Antigua and Barbuda | 2.823508986 | 2.480503772 | 10.57162833 | 21.41258835 | 34.5844425 | 57.34590509 | 100.4809491 | 150.7617441 | 263.2157628 | 483.5551744 | 808.9209063 | 1211.352616 | 1428.425804 | 1831.099189 | 2258.390445 | 2865.753366 | 2797.682944 | 2824.316208 | 2522.709875 |
| Argentina | 2.937487686 | 4.515726291 | 18.36478168 | 37.458229 | 62.70328566 | 119.2512443 | 199.6177984 | 302.9511101 | 526.939936 | 865.7564534 | 1317.805407 | 1909.993819 | 2345.176456 | 2813.599177 | 3173.443847 | 3436.095672 | 3646.483497 | 3304.827746 | 2857.408033 |
| Armenia | 2.398371533 | 2.319943987 | 12.81259835 | 27.67214445 | 41.10894123 | 83.31882415 | 128.4747239 | 210.751346 | 339.6937912 | 506.1422423 | 791.2308253 | 1176.006413 | 1591.397289 | 2067.320994 | 2101.158281 | 1974.382114 | 1473.225597 | 1358.564983 | 1230.353032 |
| Australia | 1.893724101 | 2.343834578 | 5.247660771 | 16.22721396 | 39.39674699 | 84.53143946 | 122.0188288 | 208.5314705 | 369.5897136 | 566.0501119 | 790.1795733 | 1149.640653 | 1450.742989 | 1807.192097 | 2338.598088 | 2575.134855 | 2817.867407 | 2832.170182 | 2530.424641 |
| Austria | 0.873495461 | 0.981618298 | 2.5046409 | 7.634920128 | 13.83884846 | 35.31570469 | 61.06612643 | 123.294113 | 244.148212 | 404.6458751 | 656.4391585 | 1010.346771 | 1373.147209 | 1715.008722 | 1950.798609 | 2265.157142 | 2464.877857 | 2459.411646 | 2295.816518 |
| Azerbaijan | 4.262127476 | 4.507750171 | 28.9333926 | 53.01070286 | 68.35930871 | 112.518387 | 175.8113058 | 267.4368062 | 395.3195273 | 585.8533605 | 826.2277813 | 1065.102343 | 1317.868137 | 1361.677448 | 1437.73394 | 1453.383516 | 1336.476426 | 1312.100923 | 980.0790676 |
| Bahamas | 3.256384828 | 3.519155274 | 18.67563209 | 41.32962708 | 81.17803617 | 170.0240093 | 260.4213717 | 360.4032391 | 501.9344669 | 803.7113747 | 1087.781531 | 1437.676829 | 1867.956292 | 2116.371666 | 2402.063453 | 2486.135901 | 2374.96222 | 2320.591908 | 1862.317178 |
| Bahrain | 2.422387111 | 2.706232008 | 8.158543791 | 24.71848403 | 28.47341383 | 58.95024941 | 74.48318296 | 120.614223 | 201.6728293 | 320.6913762 | 436.1534422 | 718.0234826 | 1008.635154 | 1374.035146 | 1598.364205 | 1908.192146 | 2181.291502 | 2234.040712 | 2346.687064 |
| Bangladesh | 2.699919936 | 3.25433243 | 4.506303164 | 8.040751042 | 13.26460968 | 26.14238647 | 40.41975266 | 67.46652398 | 131.8843639 | 222.1598927 | 281.9366356 | 378.0266068 | 472.7215399 | 554.8620917 | 613.1301747 | 763.0542123 | 728.7183105 | 628.8962559 | 571.4477962 |
| Barbados | 3.640799999 | 4.402337888 | 21.64557601 | 34.59487174 | 59.11243974 | 133.594879 | 188.2078894 | 294.4040595 | 470.0355812 | 739.9039194 | 1229.43758 | 1869.610068 | 2228.236414 | 2853.883538 | 3540.293178 | 3714.728367 | 3895.489849 | 3645.916345 | 3188.553836 |
| Belarus | 1.458362002 | 1.981364025 | 9.73161866 | 19.69203898 | 35.88943154 | 70.7546985 | 129.9961785 | 213.5571969 | 380.4876885 | 687.9725565 | 1080.635291 | 1565.667035 | 2054.234062 | 2412.780049 | 2452.228482 | 2321.643519 | 1676.70857 | 1492.33571 | 1319.32711 |
| Belgium | 2.096945389 | 1.967982332 | 4.751595718 | 9.823553931 | 20.93822078 | 44.04959953 | 80.45298768 | 144.8576844 | 292.3298222 | 498.125827 | 797.2370103 | 1197.091814 | 1572.981453 | 2050.332732 | 2438.096946 | 2822.076227 | 3349.315671 | 3724.442998 | 3694.055408 |
| Belize | 2.085348994 | 2.146541049 | 12.26173902 | 22.49717648 | 44.51507358 | 96.17722514 | 116.5797859 | 177.6586605 | 293.4297996 | 476.6228316 | 697.2530618 | 874.9473202 | 989.033622 | 1151.964554 | 1316.031586 | 1419.330589 | 1349.805821 | 1249.777535 | 1091.344672 |
| Benin | 3.290337515 | 3.712199219 | 5.385313909 | 15.68381562 | 17.29792144 | 37.73716539 | 81.27198882 | 96.35084578 | 171.2610561 | 298.7434695 | 370.9654972 | 551.0540967 | 703.7865167 | 868.9950206 | 1134.942742 | 1294.313402 | 1048.454919 | 972.7690732 | 874.7629794 |
| Bermuda | 2.720591221 | 2.326461976 | 14.48245462 | 26.54283233 | 35.82441477 | 69.14286985 | 116.4399267 | 211.242487 | 363.1184901 | 606.1586234 | 883.1953056 | 1215.534465 | 1617.384953 | 2038.397408 | 2681.522458 | 3231.815773 | 3788.945993 | 3920.044845 | 3810.39032 |
| Bhutan | 2.146547261 | 2.177750263 | 4.889465556 | 9.756331919 | 15.73821643 | 34.17149958 | 53.41946469 | 89.41934873 | 174.5030535 | 242.1497333 | 342.6801811 | 472.2792937 | 626.9835086 | 832.9034438 | 1018.131609 | 1190.381247 | 1109.03235 | 859.978387 | 702.3420915 |
| Bolivia (Plurinational State of) | 2.523644524 | 3.190505193 | 11.10274846 | 18.4451899 | 33.12991348 | 56.99080327 | 92.84241756 | 149.391418 | 258.5735395 | 414.0051826 | 604.3990278 | 886.2280845 | 1166.978294 | 1549.377683 | 1791.695639 | 1885.113957 | 2011.647674 | 1671.943601 | 1317.252151 |
| Bosnia and Herzegovina | 4.716694233 | 6.874137153 | 19.29155994 | 42.63411018 | 59.67470721 | 117.1472278 | 175.8040609 | 314.588731 | 486.9039806 | 800.7759549 | 1305.696489 | 1766.138168 | 2163.856904 | 3104.364511 | 3474.429017 | 3343.758876 | 2729.77476 | 2034.244375 | 1772.429271 |
| Botswana | 4.971702074 | 5.210787258 | 11.071042 | 22.13805382 | 43.45932584 | 88.9325464 | 157.3195291 | 261.5060889 | 430.8693376 | 667.0599033 | 934.6199772 | 1176.004167 | 1494.309347 | 1738.038461 | 2109.751008 | 2397.676551 | 2345.977625 | 1986.134463 | 1508.240785 |
| Brazil | 1.626236417 | 3.405348287 | 11.39101858 | 24.46025702 | 43.63576215 | 84.33775044 | 135.9386171 | 219.7521971 | 359.6430631 | 521.5829318 | 738.9918138 | 964.3473843 | 1150.950031 | 1325.958978 | 1472.250286 | 1546.954536 | 1580.325371 | 1378.751829 | 1186.720191 |
| Brunei Darussalam | 3.288677383 | 4.882690752 | 15.96163529 | 40.80055916 | 76.37471098 | 149.7184096 | 241.9327569 | 397.2009668 | 651.755993 | 965.0096221 | 1458.946304 | 2017.456109 | 2907.717756 | 3684.287814 | 4133.088516 | 4975.541427 | 5511.536611 | 4954.362807 | 3802.602162 |
| Bulgaria | 2.160185617 | 3.159015431 | 14.28369044 | 27.76318657 | 58.11019659 | 120.4146727 | 214.8770341 | 373.9950692 | 650.2397086 | 1127.693583 | 1789.563534 | 2382.001291 | 2862.903662 | 3138.089806 | 3361.181106 | 3156.62467 | 2815.200105 | 2273.412901 | 2028.451182 |
| Burkina Faso | 3.085215426 | 3.197299878 | 4.60968971 | 13.8564034 | 16.49492554 | 36.87541546 | 79.00530866 | 98.81307495 | 174.0424471 | 291.9931904 | 367.0214448 | 538.0166094 | 676.8356063 | 848.0924191 | 1076.676977 | 1204.944624 | 941.9271297 | 863.9614967 | 768.690409 |
| Burundi | 1.934070192 | 2.679991195 | 5.373832319 | 12.75256001 | 24.92483154 | 46.42141692 | 77.76963825 | 137.3623515 | 224.777994 | 336.6827968 | 489.9153638 | 659.4025768 | 790.1427201 | 835.1130466 | 824.8084629 | 882.4080626 | 838.6250441 | 681.2546136 | 555.2816187 |
| Cabo Verde | 3.069059477 | 4.103269662 | 8.95058447 | 26.28012412 | 17.58708041 | 41.3817874 | 97.48011242 | 110.8555007 | 210.9880367 | 344.1177847 | 450.9018961 | 653.7021249 | 872.6602207 | 1184.01537 | 1623.1472 | 2245.862948 | 2237.469741 | 2085.872096 | 1890.455041 |
| Cambodia | 3.208392235 | 4.743273376 | 20.37770018 | 37.56020216 | 57.28824824 | 105.3939252 | 160.1977961 | 258.6371191 | 418.968684 | 688.7378572 | 917.3749338 | 1212.930013 | 1471.277868 | 1643.50949 | 1759.75165 | 1731.056937 | 1656.361985 | 1306.295607 | 1222.202216 |
| Cameroon | 4.18479549 | 4.758441444 | 7.222334527 | 22.62165895 | 24.71573973 | 56.2126469 | 120.4151357 | 146.6541756 | 252.3243366 | 418.6024341 | 525.7633672 | 813.360141 | 1020.375405 | 1236.381981 | 1548.515485 | 1750.192982 | 1385.828321 | 1243.132527 | 1108.575432 |
| Canada | 1.86826776 | 2.196937873 | 4.060596587 | 11.92878916 | 29.76696926 | 66.69823512 | 109.2706761 | 199.8928792 | 340.1896091 | 572.9265606 | 863.9454314 | 1233.482349 | 1584.387547 | 1945.444155 | 2383.0663 | 2693.395196 | 2853.426609 | 3034.167394 | 3010.720037 |
| Central African Republic | 2.205524712 | 2.1540483 | 5.875092693 | 11.86499255 | 20.07933384 | 40.30533989 | 71.56484423 | 129.0330507 | 233.683397 | 367.2461929 | 508.1956383 | 615.6468329 | 686.2926389 | 709.8716621 | 712.5800012 | 687.5210984 | 635.6183661 | 546.0796224 | 440.7496562 |
| Chad | 3.967995742 | 3.9173207 | 5.041412505 | 14.57108496 | 15.86414149 | 35.50083688 | 76.76687448 | 93.88002524 | 172.9990385 | 303.7235195 | 376.0124941 | 575.0492239 | 718.3133085 | 901.0768263 | 1079.358808 | 1162.122232 | 916.8916898 | 812.7043881 | 712.8501643 |
| Chile | 1.441451855 | 2.227411362 | 7.642800419 | 16.82777011 | 36.43631012 | 70.26728176 | 119.5210878 | 164.0283149 | 304.3054133 | 453.4859146 | 692.6897247 | 968.9011233 | 1380.299639 | 1710.979756 | 2052.997407 | 2402.989618 | 2683.710436 | 2695.987774 | 2360.749813 |
| China | 2.446721209 | 2.810736905 | 15.13069043 | 36.84108145 | 66.94704292 | 134.8385205 | 211.4903004 | 311.5769699 | 399.6309051 | 559.415331 | 763.0865694 | 1016.936835 | 1266.134064 | 1662.027424 | 1916.914507 | 1958.75715 | 2200.330843 | 1711.247907 | 1395.992777 |
| Colombia | 2.877232444 | 3.623407728 | 14.96171586 | 33.93679786 | 61.00745406 | 89.03472888 | 127.7725477 | 182.1266116 | 266.0980713 | 378.923267 | 530.9593708 | 769.7341744 | 933.4158135 | 1157.869329 | 1326.090501 | 1341.209736 | 1273.442475 | 1081.473761 | 998.8865282 |
| Comoros | 2.203467558 | 3.173328814 | 5.011460931 | 14.60560231 | 29.14357292 | 55.13553906 | 91.52219903 | 156.3479199 | 247.3288925 | 366.0836207 | 519.993865 | 733.6410377 | 899.0840318 | 1005.50791 | 1034.171755 | 1146.362258 | 1111.372356 | 942.5010858 | 782.9634289 |
| Congo | 2.221066181 | 2.497078965 | 7.545080141 | 16.44417943 | 31.57277913 | 65.72424846 | 113.9367859 | 189.4587513 | 325.5717603 | 513.6807406 | 741.1936886 | 965.4984026 | 1152.978889 | 1292.714644 | 1446.214913 | 1475.761564 | 1519.052804 | 1349.758726 | 1198.266884 |
| Cook Islands | 0.9898236 | 1.192029023 | 7.761570639 | 14.93983359 | 36.05685967 | 60.23063837 | 88.94075547 | 121.7349491 | 214.9170284 | 303.2911258 | 426.1999681 | 546.9421638 | 692.10388 | 810.260421 | 964.2415833 | 1151.326001 | 1429.403896 | 956.4761011 | 1844.147481 |
| Costa Rica | 2.220673576 | 3.953215308 | 18.20311246 | 43.768551 | 74.89104173 | 128.6543806 | 173.8385929 | 241.1728935 | 392.3871861 | 572.1489091 | 830.6701377 | 1188.615254 | 1478.530228 | 1687.447559 | 2086.515513 | 2248.397108 | 2412.521815 | 2233.374248 | 2179.072772 |
| Croatia | 1.709867406 | 1.760036073 | 5.965205294 | 16.398655 | 36.86606332 | 72.85832587 | 145.6522935 | 257.625669 | 471.8409389 | 829.9755513 | 1395.78899 | 1961.321133 | 2668.357465 | 3222.833821 | 3760.971997 | 4050.947625 | 3880.072434 | 3355.261444 | 3154.059357 |
| Cuba | 2.161089794 | 2.791551981 | 10.10065812 | 18.13077698 | 31.09822112 | 65.77109697 | 117.5140773 | 213.5039193 | 349.3815088 | 548.6188257 | 839.4032767 | 1363.067593 | 1768.161598 | 2181.347188 | 2746.382054 | 2905.62511 | 2850.162555 | 2676.2007 | 2189.73319 |
| Cyprus | 2.26855723 | 2.100017298 | 3.721661356 | 8.029190473 | 20.28640999 | 33.43558419 | 68.48870575 | 127.5297131 | 236.4804483 | 375.9601436 | 573.9531658 | 859.3445211 | 1193.022923 | 1538.543313 | 2092.082527 | 2753.690803 | 3465.085671 | 3506.936833 | 2974.102586 |
| Czechia | 1.282465522 | 1.456746028 | 4.967521549 | 10.82692303 | 24.6560173 | 58.54420973 | 102.7040753 | 192.2088368 | 396.337235 | 676.1797551 | 1181.236149 | 1765.412907 | 2405.113981 | 2900.668162 | 3124.293171 | 3335.266308 | 3290.675322 | 2710.279182 | 2272.268993 |
| C么te d'Ivoire | 3.672826602 | 4.185963124 | 6.570684923 | 20.17937622 | 21.12370164 | 47.71843944 | 99.2502658 | 123.0828147 | 210.6778648 | 356.5242733 | 451.2607972 | 690.1807575 | 885.2803389 | 1078.172319 | 1399.287191 | 1590.701106 | 1292.5496 | 1151.448231 | 1039.286443 |
| Democratic People's Republic of Korea | 1.533933651 | 2.309221008 | 19.49661643 | 41.72508747 | 69.83514751 | 127.6178693 | 188.1019765 | 280.6082007 | 433.6626417 | 621.6431164 | 847.3469618 | 1050.562543 | 1163.796145 | 1243.566727 | 1233.873453 | 1047.985814 | 932.4638884 | 764.1646265 | 637.4600259 |
| Democratic Republic of the Congo | 1.612560276 | 1.690260767 | 4.593437654 | 9.705845434 | 17.05151239 | 36.11845783 | 59.02448535 | 97.78979546 | 172.659487 | 287.7662616 | 414.286701 | 549.1118518 | 647.2056243 | 724.5546178 | 768.9880993 | 791.7371515 | 776.2450312 | 707.6849323 | 646.3577435 |
| Denmark | 2.023141219 | 1.980661954 | 4.907600933 | 13.60329409 | 26.50810945 | 57.94728858 | 95.0659613 | 169.2980606 | 330.5108731 | 607.6763625 | 985.9270841 | 1583.667332 | 1988.082975 | 2769.749465 | 3429.310927 | 3797.730847 | 3946.336716 | 3861.323361 | 3591.46075 |
| Djibouti | 2.594849712 | 3.766104076 | 6.393718842 | 15.44607731 | 31.47316905 | 62.7598905 | 107.4140979 | 195.1532221 | 323.0027187 | 484.8948638 | 695.2539416 | 964.6526264 | 1191.144239 | 1317.33484 | 1373.603062 | 1503.144819 | 1451.632734 | 1183.937748 | 976.7952435 |
| Dominica | 3.122112531 | 4.690305248 | 17.02037882 | 28.17427896 | 47.94616933 | 92.29435096 | 146.5500973 | 212.2864281 | 318.2941763 | 492.9041333 | 742.8861595 | 1044.863131 | 1412.048509 | 1776.679005 | 2067.678778 | 2333.290872 | 2357.313007 | 2395.553193 | 2028.368272 |
| Dominican Republic | 5.051427181 | 4.745523885 | 17.1936918 | 29.60625157 | 53.51641641 | 111.283575 | 167.5195886 | 240.5469635 | 357.8153505 | 546.59988 | 667.4293308 | 1016.350323 | 1023.156234 | 1434.093041 | 1441.188683 | 1588.523078 | 2069.059859 | 1977.96488 | 1620.688779 |
| Ecuador | 2.827673885 | 4.540466276 | 17.23285581 | 30.95976894 | 56.77612408 | 89.5282393 | 134.5947453 | 170.0083461 | 268.5561034 | 374.6872958 | 554.0864263 | 776.9686717 | 924.3490815 | 1144.139155 | 1371.215218 | 1735.016939 | 2120.064973 | 2580.482547 | 2485.079667 |
| Egypt | 3.609863984 | 4.638147584 | 9.255269016 | 18.59726604 | 35.07508706 | 69.77874413 | 100.965489 | 144.3928385 | 255.5822144 | 420.0215762 | 554.2570255 | 723.0605009 | 782.4927311 | 847.8954768 | 874.7975453 | 835.0985046 | 724.0285612 | 605.1825457 | 518.8720929 |
| El Salvador | 1.892813908 | 2.970364707 | 12.27316455 | 26.77380435 | 51.34947279 | 102.0205246 | 150.5026039 | 204.3640192 | 293.025611 | 417.9461471 | 531.6519173 | 683.9211655 | 834.9058307 | 987.3907375 | 1171.874657 | 1210.514388 | 1249.615211 | 1004.746225 | 960.4095499 |
| Equatorial Guinea | 2.445722859 | 2.72200879 | 9.600976097 | 20.76318015 | 37.16382758 | 75.38843223 | 123.2193495 | 200.0878248 | 346.8863149 | 541.6297112 | 809.1662817 | 1089.809839 | 1393.69547 | 1633.216446 | 1945.790462 | 2087.732668 | 2140.234055 | 1900.990622 | 1609.597147 |
| Eritrea | 1.827203124 | 3.013003315 | 5.970734466 | 15.54550088 | 32.49158503 | 64.03774832 | 118.2448026 | 212.3406641 | 359.2083469 | 515.3876272 | 714.472418 | 926.5718042 | 1076.560382 | 1124.130903 | 1105.764824 | 1157.254127 | 1124.487872 | 941.4270857 | 743.280804 |
| Estonia | 1.283402556 | 1.994276797 | 11.42145628 | 15.61645314 | 31.3035396 | 73.22471328 | 109.0156436 | 189.2962764 | 356.3189293 | 550.0473978 | 905.7276327 | 1380.313258 | 1812.028219 | 2459.227947 | 2830.964845 | 3146.429947 | 2965.575073 | 2853.17244 | 2359.997101 |
| Eswatini | 4.352151922 | 4.575738334 | 10.70814193 | 20.66646851 | 39.14843087 | 81.67953489 | 146.7278036 | 256.8194599 | 422.2592481 | 641.8252482 | 840.5217599 | 1030.821012 | 1275.439213 | 1428.968927 | 1718.798007 | 1974.87927 | 1934.470398 | 1661.644912 | 1189.227222 |
| Ethiopia | 1.193440753 | 1.776539017 | 4.294343285 | 10.77452694 | 23.43646855 | 48.68076435 | 80.21306171 | 137.9313127 | 228.7101176 | 357.0573577 | 470.1351267 | 639.7805576 | 748.564662 | 813.3853678 | 838.7418785 | 977.6579414 | 933.3737068 | 832.4065901 | 695.2908992 |
| Fiji | 5.028111842 | 5.358770914 | 22.88347212 | 29.59313026 | 59.72436251 | 81.145499 | 119.6785124 | 170.4368333 | 327.2878389 | 489.8080211 | 676.8546131 | 932.7746827 | 1100.114517 | 1195.692955 | 1349.603877 | 1621.864734 | 2173.2775 | 1315.053265 | 1665.273349 |
| Finland | 1.649373256 | 1.832636684 | 3.241235062 | 8.559754721 | 18.15361059 | 42.69694061 | 71.75585672 | 123.3806126 | 239.6465902 | 398.0770886 | 608.9577578 | 853.4793684 | 1199.374232 | 1484.48151 | 1845.801088 | 2208.922625 | 2236.547511 | 2131.275345 | 1948.370225 |
| France | 1.447974243 | 1.495529317 | 3.095267674 | 8.920822455 | 23.15328137 | 51.62526921 | 96.74318769 | 168.4128575 | 313.2953006 | 516.039809 | 813.6305086 | 1179.386981 | 1517.973477 | 1813.971968 | 2167.930208 | 2614.695957 | 3246.108603 | 3783.483288 | 4030.800807 |
| Gabon | 2.711357802 | 3.031351632 | 10.56145225 | 21.73963359 | 37.04190798 | 77.3406528 | 131.6510176 | 224.6498998 | 394.435095 | 628.750678 | 938.4206417 | 1256.555447 | 1557.274258 | 1735.72203 | 1908.340877 | 1951.926362 | 1982.521566 | 1802.086699 | 1623.861134 |
| Gambia | 2.295312328 | 2.492598731 | 3.461699598 | 10.14079036 | 12.39122096 | 28.2739604 | 61.74860092 | 87.61487441 | 158.3593807 | 270.250635 | 352.0049946 | 525.0071752 | 667.23148 | 799.6531908 | 957.561687 | 997.4565947 | 816.1753358 | 708.7357144 | 591.8946285 |
| Georgia | 2.008670088 | 2.770503324 | 26.37301107 | 46.85458249 | 67.88875774 | 123.5745507 | 181.9753905 | 292.8974773 | 450.1897932 | 691.2055557 | 1024.444817 | 1278.844268 | 1428.966989 | 1671.741934 | 1727.711103 | 1489.822383 | 858.9532329 | 682.4498917 | 560.9594533 |
| Germany | 1.873118119 | 2.105000806 | 4.290018498 | 11.30104555 | 25.77535603 | 56.28202336 | 105.0880922 | 191.1967897 | 332.1660045 | 559.9074182 | 852.3019344 | 1223.804021 | 1613.678201 | 2126.85104 | 2574.05214 | 3036.270778 | 3569.997882 | 3730.209694 | 3574.600829 |
| Ghana | 5.766572447 | 6.951706686 | 12.29857095 | 41.04299413 | 26.77636053 | 54.82760118 | 117.6256529 | 128.1236878 | 211.624058 | 375.6832225 | 436.6383879 | 686.0713998 | 803.2880635 | 976.226286 | 1240.782314 | 1450.496323 | 1123.031342 | 986.3387621 | 869.4167514 |
| Greece | 2.377881309 | 2.423694961 | 5.116259639 | 9.755922563 | 20.41495221 | 49.23885077 | 81.36747021 | 157.4731018 | 277.3565869 | 481.8516056 | 687.8504796 | 1014.166249 | 1327.487514 | 1700.604289 | 2173.280037 | 2563.487713 | 2957.470517 | 2913.659027 | 2718.250705 |
| Greenland | 2.350295704 | 4.005638775 | 10.40731618 | 21.86062129 | 48.92522226 | 125.2613971 | 233.898523 | 432.6373617 | 823.5098473 | 1319.439941 | 1911.158346 | 2537.174184 | 3066.48746 | 3577.253312 | 4233.658816 | 4562.019162 | 4792.106531 | 4218.653621 | 3678.424814 |
| Grenada | 3.37051834 | 3.212319549 | 15.84525582 | 27.87345213 | 42.43638904 | 109.0172306 | 176.3991374 | 255.2464293 | 400.3279541 | 637.6041133 | 1013.727692 | 1569.553676 | 2155.982302 | 2408.686247 | 2565.178578 | 2715.741217 | 2855.584267 | 2571.913486 | 2150.25583 |
| Guam | 4.233796147 | 5.674903508 | 36.54626411 | 43.72630657 | 100.2733832 | 172.4967042 | 231.2130477 | 293.6383506 | 454.7219985 | 745.6893103 | 948.1104247 | 1153.544956 | 1399.765309 | 1381.6814 | 1532.279263 | 1624.065079 | 2146.658407 | 1396.610655 | 2419.533491 |
| Guatemala | 3.295810232 | 4.463747841 | 18.23141993 | 30.49139602 | 51.3709827 | 85.25718765 | 142.6366813 | 183.4650344 | 269.2712888 | 377.7714805 | 473.8101092 | 647.3463065 | 802.8550284 | 912.5951306 | 1008.213655 | 1176.21627 | 1561.91519 | 1778.707894 | 1526.646152 |
| Guinea | 3.660903437 | 3.659709702 | 5.428139293 | 14.37925255 | 18.10803357 | 38.8876756 | 75.2885415 | 101.0915591 | 175.6226847 | 307.2496867 | 391.929198 | 585.5377395 | 729.9134354 | 874.3102262 | 1045.101115 | 1094.691412 | 852.3616153 | 755.6895564 | 686.2075046 |
| Guinea-Bissau | 2.655351827 | 3.542303049 | 6.458677456 | 20.73550016 | 22.82555684 | 52.83104286 | 119.6488736 | 149.0975086 | 259.8735834 | 421.0598372 | 527.3877084 | 752.2464677 | 901.0058503 | 1046.731354 | 1210.046311 | 1323.617824 | 1067.371747 | 931.9830168 | 781.7737633 |
| Guyana | 4.121997885 | 4.300412144 | 16.14647654 | 35.37037594 | 64.12756859 | 138.1449339 | 205.2371726 | 315.8704757 | 456.8481508 | 705.0756196 | 977.2774607 | 1248.331855 | 1357.376838 | 1544.21277 | 1824.389557 | 1886.629705 | 1794.277536 | 1891.562109 | 1692.535498 |
| Haiti | 5.94333939 | 3.9081838 | 10.75493546 | 18.12332339 | 32.42642029 | 69.08910231 | 110.4291425 | 186.4779249 | 289.4764348 | 466.4019188 | 664.6866918 | 896.13406 | 1067.033346 | 1231.974361 | 1364.86682 | 1400.306805 | 1316.036922 | 1169.682261 | 919.7427214 |
| Honduras | 1.201012526 | 2.032036775 | 6.889716651 | 11.71618476 | 17.395071 | 34.49991288 | 61.15343934 | 116.2286658 | 204.9943493 | 311.2337986 | 447.9270894 | 621.5855396 | 768.824699 | 915.1039893 | 1046.291603 | 1027.861424 | 1050.768714 | 1005.849428 | 902.2642416 |
| Hungary | 1.684030683 | 2.28232968 | 6.691866343 | 16.32588927 | 43.133914 | 91.74413554 | 172.9541057 | 294.2034103 | 581.0563555 | 1121.453101 | 1887.74059 | 2649.012148 | 3229.567511 | 3766.391955 | 4039.971572 | 3777.712819 | 3682.613825 | 3017.653345 | 2448.431895 |
| Iceland | 1.543426144 | 1.445750574 | 3.108160905 | 9.0104887 | 18.08821643 | 36.61946621 | 67.83721675 | 121.7590991 | 217.7277836 | 369.0597326 | 583.7914404 | 850.5493601 | 1113.899084 | 1403.221101 | 1743.370214 | 2038.007874 | 2193.531347 | 2243.552654 | 2236.496331 |
| India | 2.964846084 | 3.176278461 | 6.597544496 | 15.42535654 | 22.56518526 | 51.53527398 | 80.5025833 | 127.357221 | 235.0845888 | 349.5911624 | 457.1755893 | 565.4873379 | 692.6464268 | 838.5083713 | 975.4694355 | 1177.255592 | 961.6315423 | 817.1083579 | 687.3811247 |
| Indonesia | 3.62537953 | 5.368036249 | 22.7415013 | 37.89022506 | 58.08220951 | 107.1330884 | 164.4373528 | 262.9188935 | 418.135092 | 670.4960923 | 899.356405 | 1246.027236 | 1591.42916 | 1857.106492 | 2022.495319 | 2068.983071 | 2125.183028 | 1770.075001 | 1736.258933 |
| Iran (Islamic Republic of) | 3.45715465 | 4.617481406 | 13.01236693 | 20.80257674 | 35.51913962 | 71.69446881 | 102.3687763 | 149.1115984 | 238.4059206 | 361.0103101 | 527.5006791 | 724.560608 | 879.7096713 | 1075.622359 | 1295.905142 | 1365.37555 | 1316.262756 | 1146.694683 | 1094.549869 |
| Iraq | 2.177664794 | 2.639294882 | 11.25447801 | 22.63127255 | 32.73955491 | 58.34490003 | 97.53293832 | 169.2255668 | 292.2084338 | 428.5298187 | 537.3818115 | 649.567051 | 792.5102117 | 942.3629166 | 1061.497528 | 1110.752135 | 1057.75916 | 849.4554834 | 696.5032337 |
| Ireland | 1.566009894 | 1.556436268 | 3.202108523 | 10.55887921 | 24.20686384 | 49.70772662 | 88.8698634 | 157.7075132 | 289.0292211 | 554.9512354 | 865.9952172 | 1234.134744 | 1699.915535 | 2244.710887 | 2743.550776 | 3257.418879 | 3396.411542 | 3377.856164 | 2595.438389 |
| Israel | 1.852825961 | 2.771359814 | 5.639202079 | 12.71059703 | 30.10725951 | 63.32086968 | 103.4032793 | 188.0331218 | 306.2780793 | 489.3973546 | 740.9815095 | 1046.609855 | 1371.261757 | 1677.28424 | 2411.963906 | 2885.876733 | 3486.342556 | 3671.285534 | 3695.214077 |
| Italy | 1.567853521 | 1.945595551 | 3.795190698 | 9.708456782 | 21.98144983 | 51.28030861 | 91.84505439 | 166.4502548 | 313.797737 | 549.15999 | 831.5016197 | 1183.915687 | 1542.639646 | 1902.681319 | 2316.385768 | 2690.893618 | 2897.518397 | 2757.84377 | 2700.68258 |
| Jamaica | 3.848313448 | 4.216245608 | 12.88676877 | 32.71863116 | 57.15399949 | 120.5267209 | 149.928999 | 286.1400759 | 428.3481301 | 680.2018158 | 999.8497473 | 1486.508804 | 1807.537062 | 2100.196084 | 2247.133386 | 2054.619446 | 1980.022599 | 1653.299518 | 1400.870865 |
| Japan | 2.053741335 | 1.62571942 | 5.575059735 | 14.20557301 | 28.13355117 | 63.29036539 | 118.3322317 | 206.0079516 | 349.4275427 | 589.9541881 | 916.3277199 | 1307.511421 | 1593.974881 | 1847.388898 | 2070.42153 | 2349.345157 | 2790.699714 | 3144.100085 | 3717.536858 |
| Jordan | 2.739614417 | 3.401685927 | 8.976106967 | 17.70614314 | 28.30620861 | 64.95389509 | 122.8572446 | 205.3658024 | 313.0534074 | 538.2145952 | 742.2047992 | 1026.945801 | 1274.371924 | 1439.410841 | 1774.324396 | 1828.966439 | 1974.267021 | 1940.923008 | 1860.286455 |
| Kazakhstan | 1.181321936 | 1.405443986 | 9.891024515 | 19.24889324 | 36.76595444 | 69.60772846 | 118.8641344 | 188.9167007 | 326.9896381 | 516.4062863 | 820.8768136 | 1240.553035 | 1630.900478 | 1816.465458 | 1946.210311 | 1825.073906 | 1243.526573 | 1073.230765 | 930.346537 |
| Kenya | 1.428429896 | 1.860367595 | 4.028829285 | 10.60724737 | 21.93171642 | 45.84946478 | 78.8403513 | 137.4417112 | 234.9578666 | 353.7047474 | 517.991816 | 689.7871961 | 855.7224464 | 981.0288757 | 999.1950764 | 1086.117686 | 1066.393844 | 848.0982158 | 649.3214514 |
| Kiribati | 3.795060259 | 3.957542166 | 26.47788508 | 44.62857158 | 87.7222194 | 129.2255099 | 169.0257694 | 248.5128868 | 409.9491265 | 536.6033445 | 707.9784459 | 878.4099369 | 989.276255 | 1074.951223 | 1276.140093 | 1366.499732 | 1456.918611 | 843.9415176 | 1297.386059 |
| Kuwait | 2.79632127 | 2.744095266 | 5.206027122 | 11.81605371 | 14.82878171 | 33.70734626 | 53.93198281 | 88.94084041 | 171.5098095 | 271.3730294 | 462.1101738 | 801.395634 | 940.8537648 | 1310.048412 | 1440.748563 | 1486.978379 | 1947.573873 | 1671.124464 | 1724.859619 |
| Kyrgyzstan | 1.177625007 | 1.607435149 | 9.541665429 | 17.37157084 | 33.93137026 | 57.48888249 | 93.25148655 | 128.1504797 | 183.1454478 | 276.3981503 | 509.0315893 | 670.1410549 | 884.403325 | 924.091742 | 1052.267351 | 1238.703444 | 1193.008372 | 998.3694057 | 641.5630509 |
| Lao People's Democratic Republic | 4.102432567 | 5.961518687 | 20.41886249 | 38.73506612 | 61.82149702 | 116.7390796 | 170.9412989 | 270.341609 | 406.6899118 | 643.40988 | 841.7685835 | 1143.682502 | 1375.871961 | 1546.007521 | 1647.406644 | 1670.77995 | 1573.552756 | 1241.448902 | 1183.651449 |
| Latvia | 1.351001749 | 1.655002247 | 7.448278515 | 19.06571325 | 35.48772547 | 75.30526129 | 116.7458719 | 186.5228152 | 326.5176444 | 616.3267855 | 950.0032625 | 1412.424213 | 1924.991383 | 2387.368206 | 2620.07105 | 2877.648845 | 2169.08653 | 2023.754783 | 1595.346667 |
| Lebanon | 2.267710601 | 3.042514804 | 11.10527909 | 25.1292017 | 43.17956102 | 89.23614522 | 143.3648138 | 242.140369 | 411.1531968 | 641.6111653 | 920.2577474 | 1276.137692 | 1599.1175 | 2078.833522 | 2676.890709 | 2754.783842 | 2735.904559 | 2402.870536 | 2194.159756 |
| Lesotho | 3.529016637 | 3.744375248 | 8.341316271 | 16.69232495 | 31.93161401 | 67.54922001 | 120.2233854 | 211.6370874 | 364.8534034 | 571.6641143 | 774.7967017 | 952.0559715 | 1138.615777 | 1252.093279 | 1443.699508 | 1634.077264 | 1595.286123 | 1365.528537 | 964.8591974 |
| Liberia | 2.292673224 | 2.743529851 | 4.085818562 | 13.27996706 | 15.38729131 | 33.565049 | 70.86141985 | 83.43306242 | 149.640415 | 254.0828322 | 320.3306293 | 485.0350226 | 614.1486365 | 755.6645895 | 983.3167627 | 1140.340689 | 954.3045223 | 851.9572665 | 757.4863572 |
| Libya | 1.667873442 | 2.099491997 | 7.674712168 | 18.85323098 | 35.35827468 | 87.52396612 | 150.9279814 | 254.9960768 | 435.0817782 | 640.4427623 | 852.9122997 | 1136.597609 | 1322.859899 | 1613.188693 | 1437.62136 | 1328.939633 | 1317.35292 | 1220.769807 | 1148.813524 |
| Lithuania | 1.388323224 | 2.291672094 | 9.794637563 | 15.7258268 | 35.30135329 | 75.34251004 | 124.3185403 | 188.3312065 | 346.5861265 | 557.6726457 | 968.7217948 | 1420.862849 | 1917.557999 | 2156.882121 | 2447.889781 | 2532.283241 | 2223.87978 | 1995.663787 | 1665.94923 |
| Luxembourg | 1.481279248 | 1.51701344 | 4.15261839 | 11.46865647 | 24.45818983 | 52.03046861 | 88.09518185 | 142.5421403 | 250.0156066 | 416.6434525 | 655.4712479 | 1055.501502 | 1477.724614 | 1968.458554 | 2486.891749 | 2799.341377 | 3127.239047 | 3127.68013 | 3167.269873 |
| Madagascar | 1.553925081 | 2.567123671 | 5.003995136 | 13.42345307 | 27.81772648 | 53.0664647 | 85.4516122 | 144.6206322 | 228.0724454 | 339.2991432 | 478.9041847 | 644.0182667 | 758.5563827 | 809.9555494 | 803.6612543 | 869.4030654 | 858.7078929 | 717.8176462 | 588.2474128 |
| Malawi | 2.008912691 | 2.370125547 | 4.191920213 | 9.439651585 | 18.40124723 | 34.47951433 | 54.90904837 | 94.05727853 | 157.6914934 | 236.404824 | 349.4117335 | 488.1228318 | 643.0406197 | 771.9112017 | 857.3844752 | 843.2253016 | 721.6322014 | 589.7765423 | 519.1471817 |
| Malaysia | 1.911445331 | 3.537056832 | 12.76740118 | 25.96320691 | 52.10704968 | 109.9745065 | 168.9385637 | 256.3544167 | 421.0788109 | 680.1679326 | 1015.716436 | 1417.557421 | 1885.544641 | 2414.517183 | 2856.575371 | 3487.122204 | 3571.425152 | 2462.204836 | 2295.698534 |
| Maldives | 0.87222691 | 1.162719198 | 3.70059219 | 7.207324609 | 16.48437786 | 36.45724159 | 61.87660878 | 97.41294531 | 166.9244882 | 267.4777674 | 384.7324627 | 550.6141462 | 759.9982609 | 1010.703391 | 1348.023341 | 1626.718047 | 1614.837102 | 1181.237657 | 997.4942343 |
| Mali | 3.192435368 | 3.755139679 | 5.444390406 | 14.6718011 | 18.31161549 | 41.45842485 | 85.35807629 | 113.5834246 | 202.1531631 | 344.0503532 | 436.0061795 | 644.3268812 | 803.496458 | 961.0749893 | 1131.634092 | 1143.166124 | 912.1196847 | 743.2950745 | 620.069118 |
| Malta | 2.437445136 | 2.396648426 | 5.340474642 | 12.11105315 | 26.28907555 | 49.73156414 | 84.55283802 | 142.0124969 | 250.3587454 | 409.891296 | 674.5426056 | 1020.724665 | 1456.422011 | 1776.220287 | 2137.929074 | 2354.035207 | 2384.906618 | 2336.189682 | 2195.390174 |
| Marshall Islands | 2.61840912 | 3.048037095 | 20.3347782 | 35.1544331 | 86.79916851 | 133.2528463 | 186.3729013 | 258.6969787 | 446.3246289 | 596.0478951 | 823.9695487 | 983.6861192 | 1166.808072 | 1242.907617 | 1370.907171 | 1521.633127 | 1805.017395 | 1077.828222 | 1961.844449 |
| Mauritania | 2.823544391 | 3.115866342 | 4.198234248 | 12.5125972 | 14.42609217 | 32.5837566 | 69.99957871 | 86.74029545 | 159.7280874 | 283.5154927 | 362.2991842 | 560.380412 | 741.8216272 | 953.5983352 | 1288.944929 | 1522.958227 | 1316.353305 | 1159.912923 | 1020.563304 |
| Mauritius | 1.770971221 | 2.185067958 | 16.18337225 | 22.25183198 | 38.68533848 | 84.25788133 | 147.6419174 | 220.3599326 | 335.16631 | 639.3189005 | 713.3292022 | 1019.044524 | 1395.59714 | 1521.332269 | 1586.788714 | 1747.978182 | 1633.661585 | 1249.439177 | 1958.863542 |
| Mexico | 1.84050355 | 2.890889448 | 10.53817261 | 24.13421084 | 47.01692947 | 80.20197512 | 127.0129973 | 199.185763 | 283.5102902 | 416.6971071 | 563.6153619 | 734.112942 | 905.2163725 | 1024.255794 | 1167.650208 | 1226.985259 | 1261.957735 | 1113.643674 | 968.8156528 |
| Micronesia (Federated States of) | 2.133322917 | 2.703423298 | 20.83891101 | 39.5207886 | 94.08362721 | 146.4626164 | 172.0282885 | 232.6833226 | 457.4327972 | 661.4498328 | 888.1772544 | 1052.807255 | 1209.100179 | 1328.077284 | 1494.498782 | 1702.231903 | 1933.446978 | 1167.17128 | 1980.162278 |
| Monaco | 2.129998317 | 2.696854883 | 6.854829392 | 20.5945078 | 46.57249166 | 99.38929716 | 162.427699 | 273.611276 | 453.909936 | 755.3870381 | 1151.576546 | 1650.888157 | 2182.747125 | 2865.114287 | 3616.800696 | 4248.717549 | 4640.062208 | 4644.94858 | 4398.683129 |
| Mongolia | 0.881693892 | 0.878637468 | 4.137276488 | 25.25623408 | 44.90744552 | 89.31459787 | 141.4897638 | 191.0571132 | 251.2089345 | 448.0522848 | 554.1064901 | 704.2711666 | 993.7877116 | 1027.088173 | 1120.079182 | 1187.281717 | 1169.097224 | 1296.421845 | 1260.323027 |
| Montenegro | 1.8206468 | 2.67983571 | 6.581022692 | 20.46116301 | 41.87252532 | 71.04711219 | 123.4821776 | 190.7748575 | 335.9980383 | 636.7977596 | 1071.093186 | 1482.768354 | 1931.286 | 2203.04716 | 2487.870787 | 2455.031269 | 2269.556914 | 1902.585978 | 1615.270643 |
| Morocco | 1.895133108 | 2.11409269 | 4.898871702 | 10.45874151 | 19.00262027 | 42.23350872 | 73.75269952 | 123.215544 | 229.9458217 | 392.7800759 | 576.2736807 | 792.2076525 | 882.8536322 | 1069.677383 | 1095.494432 | 1050.063245 | 967.3415867 | 852.1460829 | 724.3035501 |
| Mozambique | 1.157928091 | 1.447407311 | 3.752172308 | 10.1093151 | 22.01738293 | 44.55437209 | 76.97991071 | 139.0493792 | 229.311708 | 334.1704352 | 490.6184563 | 683.9993501 | 871.7006019 | 1031.329679 | 1212.035718 | 1280.26891 | 1192.250527 | 956.2681822 | 727.4832485 |
| Myanmar | 4.009692805 | 6.304986287 | 23.54685432 | 41.90608548 | 62.10096666 | 116.8149078 | 169.5457682 | 254.7000356 | 387.6242655 | 621.1904068 | 794.2660132 | 1058.174661 | 1292.996945 | 1505.222591 | 1627.919392 | 1635.914475 | 1516.062846 | 1200.565563 | 1147.437469 |
| Namibia | 2.424768044 | 2.335447811 | 5.344082385 | 10.36980112 | 19.24772359 | 39.9332854 | 72.73895665 | 127.9755627 | 226.4807715 | 361.0413312 | 494.237248 | 641.6046682 | 838.2701386 | 1016.7722 | 1243.90341 | 1370.710383 | 1244.481437 | 933.5072719 | 628.7467293 |
| Nauru | 4.322532162 | 4.736768477 | 30.87363285 | 54.42618679 | 120.5844714 | 185.9136721 | 257.4061025 | 369.350239 | 608.2975786 | 823.4375701 | 1087.178007 | 1331.265426 | 1519.347526 | 1653.609654 | 1880.974338 | 2057.380693 | 2525.957163 | 1508.413018 | 2449.443675 |
| Nepal | 1.447952205 | 1.531246461 | 4.12972273 | 8.569822574 | 12.7252851 | 28.11534217 | 45.94126377 | 78.82321193 | 152.3773543 | 212.1537091 | 283.3759238 | 385.8499365 | 505.1343442 | 636.7235032 | 750.8299213 | 849.7724321 | 808.3621848 | 662.7823728 | 528.959917 |
| Netherlands | 1.742722134 | 2.237338515 | 4.044031479 | 9.735090064 | 23.68933077 | 55.09130703 | 105.725263 | 203.8875689 | 376.4187452 | 656.5030999 | 1039.981899 | 1530.260279 | 2099.970577 | 2612.409899 | 3070.462419 | 3667.611675 | 4213.925414 | 4620.482482 | 4481.993371 |
| New Zealand | 2.478532894 | 2.330021287 | 6.718633994 | 19.24203525 | 44.39915608 | 85.42433994 | 135.0549609 | 241.8371996 | 406.5252698 | 645.2280343 | 1001.583361 | 1351.29109 | 1899.656251 | 2587.842956 | 3132.161895 | 3473.871965 | 3762.437049 | 3584.440489 | 3107.683348 |
| Nicaragua | 3.060422182 | 3.605374716 | 15.12759908 | 20.65345439 | 30.89241802 | 46.92769622 | 76.79852843 | 135.3748725 | 222.9779625 | 374.2290256 | 528.7956249 | 745.4839502 | 953.8498001 | 1217.020392 | 1629.821785 | 1853.096473 | 1820.841387 | 1633.531559 | 1501.885471 |
| Niger | 2.415293036 | 2.658799878 | 3.541457287 | 10.12331502 | 12.45735675 | 27.53254841 | 58.42414859 | 71.09358879 | 127.5807986 | 228.8279364 | 277.9955647 | 415.3431482 | 524.5746363 | 654.2504315 | 839.9541783 | 939.3201093 | 750.0272778 | 671.9822799 | 590.5311045 |
| Nigeria | 2.56853116 | 2.582090544 | 3.026542412 | 8.557294634 | 13.06164044 | 30.30890489 | 64.22604015 | 87.80655828 | 166.230941 | 289.5737495 | 387.6341278 | 590.5350673 | 793.2483505 | 1034.038373 | 1413.038062 | 1558.489481 | 1251.020157 | 1032.41502 | 864.3805563 |
| Niue | 3.7128997 | 4.060487137 | 26.15253118 | 36.40424646 | 72.47319787 | 105.6052851 | 147.9907321 | 215.4717757 | 388.9322462 | 572.9899196 | 822.0553747 | 1084.264618 | 1323.609336 | 1458.864243 | 1693.850134 | 1881.688418 | 2217.14427 | 1364.018247 | 2236.542185 |
| North Macedonia | 2.628436104 | 2.874023713 | 6.62405317 | 21.37439234 | 45.45369804 | 84.54376671 | 180.633472 | 265.4778303 | 509.2937763 | 816.3568657 | 1402.711989 | 1801.047917 | 2491.159019 | 2782.612071 | 3414.940654 | 3130.374597 | 2644.693343 | 2214.706853 | 2023.211439 |
| Northern Mariana Islands | 3.704044711 | 4.188159626 | 27.30193246 | 40.75385011 | 80.2411764 | 129.3430908 | 184.2894385 | 245.2282509 | 569.9080644 | 697.4669151 | 1145.86252 | 1362.79149 | 1779.555088 | 1923.662435 | 2293.634826 | 2427.632343 | 3256.202585 | 2059.443097 | 4242.345633 |
| Norway | 1.704800635 | 2.028400375 | 4.300715079 | 11.56121821 | 26.91079564 | 55.01147343 | 105.0659472 | 175.8285742 | 335.5737894 | 560.156355 | 843.1557716 | 1376.237031 | 1822.152306 | 2426.555484 | 3092.315932 | 3479.414851 | 3907.85445 | 3832.777054 | 3671.775308 |
| Oman | 2.155911919 | 2.437872729 | 4.911172194 | 10.13797018 | 14.595172 | 31.53429622 | 51.43111105 | 88.12122094 | 145.6342723 | 247.1357261 | 411.6473429 | 627.719363 | 997.4858369 | 1349.796271 | 1661.141221 | 1977.197019 | 1647.587658 | 1429.472005 | 1210.804968 |
| Pakistan | 3.780910348 | 3.229563345 | 7.187582967 | 18.98462287 | 36.17586688 | 75.86565086 | 116.1600621 | 178.0057613 | 294.9481625 | 401.0808349 | 528.3648906 | 707.5898198 | 833.830497 | 948.528328 | 1035.122697 | 1067.285708 | 949.3275902 | 797.4874089 | 681.1714052 |
| Palau | 2.173228837 | 2.388790886 | 13.35942886 | 17.26005598 | 48.91281637 | 79.73788047 | 132.0412401 | 193.8218587 | 346.3934341 | 500.7814581 | 774.0658077 | 963.7130872 | 1240.505323 | 1425.993121 | 1799.24365 | 2270.235205 | 2515.303108 | 1537.585978 | 2412.375702 |
| Palestine | 3.370255301 | 4.372045391 | 16.45469785 | 31.41307474 | 52.63621655 | 81.78478406 | 149.6519295 | 268.8928881 | 486.9892416 | 860.1805603 | 1153.988705 | 1494.820085 | 2126.750537 | 2592.22665 | 2970.670332 | 2514.904373 | 2380.594314 | 1842.462335 | 1848.004358 |
| Panama | 2.178134931 | 3.274885516 | 10.36702011 | 24.19742258 | 41.56717897 | 68.88196778 | 101.6874761 | 169.6127724 | 299.4773542 | 430.4248692 | 621.0621685 | 807.0987764 | 1071.120894 | 1310.999099 | 1396.820304 | 1507.819268 | 1720.813514 | 1476.451268 | 1521.412479 |
| Papua New Guinea | 3.314041126 | 3.230139179 | 16.88326723 | 21.91761771 | 45.84904745 | 66.80789454 | 95.75009732 | 138.131929 | 242.5139774 | 351.2937225 | 490.2028682 | 615.22219 | 742.7372479 | 807.1819013 | 882.0623454 | 933.2721515 | 1066.697713 | 606.3128839 | 959.678286 |
| Paraguay | 2.502212445 | 5.046578364 | 15.55506761 | 24.75549563 | 42.84703997 | 77.77881029 | 125.8476156 | 198.1894803 | 346.7307862 | 517.5723221 | 692.6465759 | 893.0599592 | 1111.864378 | 1344.050298 | 1674.679573 | 1871.518215 | 1792.03815 | 1505.501222 | 1241.665822 |
| Peru | 2.815272243 | 3.844735666 | 14.1289531 | 23.76142332 | 41.92968507 | 63.0774632 | 90.94294319 | 142.237606 | 218.0633189 | 318.6443059 | 458.6361688 | 657.4001158 | 896.1646671 | 1128.061532 | 1376.798837 | 1478.402023 | 1590.215868 | 1449.664602 | 1381.59585 |
| Philippines | 6.658296324 | 8.44460996 | 23.04014942 | 51.01019468 | 90.69670891 | 168.1409837 | 243.8654901 | 347.9212404 | 516.9775328 | 758.5444934 | 1020.394684 | 1325.798929 | 1623.029255 | 1720.851959 | 1706.984893 | 1645.478361 | 1533.268976 | 1252.347321 | 1033.405118 |
| Poland | 1.407775701 | 1.994002153 | 6.797258423 | 14.16049218 | 29.28506116 | 66.53595675 | 137.0000177 | 243.4478604 | 471.587853 | 866.5202704 | 1394.951431 | 2020.615316 | 2693.047233 | 3168.42127 | 3575.077603 | 3530.227611 | 3488.35451 | 3128.01881 | 2789.364889 |
| Portugal | 2.105919212 | 2.456970625 | 5.316703949 | 17.51363443 | 35.10069798 | 74.32132339 | 143.7020345 | 246.2732295 | 456.090318 | 732.8646129 | 1084.509785 | 1507.545432 | 1887.91617 | 2284.300165 | 2789.611985 | 3187.792772 | 3499.324839 | 3583.300403 | 3513.112232 |
| Puerto Rico | 1.102964236 | 1.0123753 | 6.222665429 | 18.66766803 | 38.76687828 | 89.54266768 | 162.2923774 | 289.1289165 | 439.7132864 | 720.6073904 | 1055.758343 | 1278.159557 | 1585.17322 | 1687.891655 | 1948.216102 | 2025.223645 | 2304.291363 | 2084.702973 | 2046.484558 |
| Qatar | 1.872684087 | 2.219310696 | 5.64079306 | 11.31560576 | 14.65295735 | 31.89713816 | 62.05828097 | 85.87030637 | 166.8139404 | 250.7538861 | 429.1371305 | 657.8396317 | 1158.755505 | 1937.677807 | 3039.551749 | 3889.794769 | 3857.952896 | 2936.641329 | 2229.538153 |
| Republic of Korea | 2.031280259 | 1.721787154 | 5.847917808 | 12.60413474 | 28.91830426 | 59.82898116 | 102.9851198 | 175.7208649 | 273.5918028 | 451.6699175 | 634.3473323 | 860.6264214 | 1145.60687 | 1559.342337 | 2031.992641 | 2519.28028 | 2923.406001 | 2906.141764 | 2737.71967 |
| Republic of Moldova | 3.945126293 | 4.744795598 | 13.95048459 | 29.6101126 | 51.26537797 | 107.7476617 | 156.4165476 | 248.4734383 | 458.6768798 | 793.1978746 | 1371.524737 | 2013.024466 | 2543.603953 | 2554.055028 | 2230.02937 | 1538.113052 | 1093.008322 | 855.0314496 | 512.7559753 |
| Romania | 5.309068503 | 6.920128733 | 17.77421289 | 29.27618619 | 58.12745567 | 99.55673757 | 176.8533584 | 286.7069191 | 537.1806849 | 908.4909045 | 1418.694323 | 1867.555981 | 2318.112358 | 2738.820315 | 2926.418806 | 2579.970313 | 1992.986717 | 1230.708266 | 880.4579957 |
| Russian Federation | 1.539624747 | 2.040506044 | 7.297818015 | 18.79788596 | 44.19005667 | 99.81097746 | 166.9542592 | 266.1900057 | 435.7534481 | 709.2228651 | 1086.934854 | 1577.813271 | 2036.521587 | 2451.4682 | 2628.367565 | 2434.019599 | 1934.913525 | 1840.1168 | 1747.107736 |
| Rwanda | 2.008452505 | 2.860856531 | 6.043463211 | 15.25077979 | 29.67403966 | 57.96696823 | 92.48134456 | 152.9235363 | 251.7199277 | 381.4632063 | 547.1977604 | 738.6332017 | 914.030777 | 1023.902327 | 1067.718324 | 1188.743574 | 1160.721621 | 966.9311953 | 802.665307 |
| Saint Kitts and Nevis | 3.319041009 | 3.294241256 | 14.11734318 | 22.43553432 | 28.19372341 | 50.77164501 | 88.24477319 | 178.5141883 | 350.6636186 | 681.8331164 | 1075.30995 | 1503.243263 | 1940.179154 | 2313.724831 | 2691.350079 | 2758.86001 | 2638.846892 | 2319.985871 | 1752.718012 |
| Saint Lucia | 2.564248768 | 2.52424224 | 9.869135258 | 20.49285341 | 38.32726742 | 80.1394945 | 117.8288275 | 208.550761 | 321.8544055 | 466.0864354 | 647.2348995 | 896.0317201 | 1068.309593 | 1368.440612 | 1494.306118 | 1631.864233 | 2019.579462 | 2303.292218 | 2054.143256 |
| Saint Vincent and the Grenadines | 1.948371414 | 4.006755215 | 13.6778974 | 23.10530467 | 45.47758561 | 90.26734084 | 142.4498344 | 241.5824608 | 427.7478918 | 628.3761864 | 804.7123867 | 1006.383442 | 1272.671836 | 1548.410098 | 1920.317149 | 2121.12771 | 2290.703199 | 2317.37986 | 1825.232018 |
| Samoa | 1.866517152 | 1.787325854 | 7.74902118 | 12.85742898 | 36.25842304 | 63.55202864 | 113.3000958 | 174.7148787 | 318.5181333 | 466.0877395 | 672.6393855 | 853.4458076 | 1053.839412 | 1164.372347 | 1272.026021 | 1276.144873 | 1369.675382 | 803.9600399 | 969.5108909 |
| San Marino | 2.312871782 | 2.324519114 | 4.868107373 | 15.4190149 | 35.85155538 | 70.51365878 | 114.4997607 | 188.5721067 | 341.1697972 | 585.266333 | 911.4231102 | 1355.890647 | 1859.307255 | 2483.697748 | 3140.509964 | 3774.737715 | 4418.270699 | 4551.079318 | 4531.010111 |
| Sao Tome and Principe | 5.822366256 | 7.070964217 | 17.0482536 | 50.21266875 | 28.3049355 | 67.74717699 | 144.5497147 | 152.7440407 | 284.3520674 | 522.8231536 | 662.7317276 | 1139.339303 | 1482.763813 | 1871.195605 | 2267.075195 | 2353.373319 | 2259.152782 | 2137.680484 | 1912.62548 |
| Saudi Arabia | 1.271172197 | 1.613488444 | 4.891179455 | 13.0755486 | 29.04103296 | 65.35600279 | 112.6136168 | 196.2091729 | 319.3127672 | 480.121252 | 604.5885048 | 762.7696274 | 922.7465434 | 1122.006937 | 1258.52606 | 1296.769545 | 1281.682744 | 1059.225182 | 1011.13695 |
| Senegal | 2.985418867 | 3.524375582 | 5.625155176 | 17.71094439 | 18.98935472 | 41.69315686 | 87.40901164 | 106.4872666 | 191.2968222 | 329.7745334 | 421.7397954 | 635.8731773 | 809.8009935 | 1022.054399 | 1292.208378 | 1460.876188 | 1216.986861 | 1078.184523 | 927.5534315 |
| Serbia | 1.373846288 | 1.818865929 | 5.434953461 | 17.21924719 | 45.73174067 | 92.51246 | 180.6859481 | 346.2297273 | 558.569756 | 1015.380072 | 1623.389242 | 2110.181919 | 2833.552686 | 3007.83833 | 3244.17965 | 3843.975303 | 3568.131918 | 3087.338 | 2560.368483 |
| Seychelles | 2.85601956 | 4.438491281 | 19.47247861 | 50.59806092 | 90.57298799 | 182.5016604 | 255.5420969 | 433.7117915 | 685.0599261 | 1040.270456 | 1366.488607 | 1858.736246 | 2472.372355 | 2707.187879 | 3448.959348 | 3609.761567 | 3761.177504 | 3703.697389 | 3973.37229 |
| Sierra Leone | 3.641172271 | 3.679559781 | 4.668963236 | 14.12012564 | 16.44326386 | 36.60002933 | 76.45553131 | 92.81599395 | 161.0016037 | 273.7552229 | 336.7161191 | 517.7968959 | 646.7956657 | 790.0217502 | 1024.331899 | 1185.055213 | 940.9366916 | 842.3798922 | 752.7485046 |
| Singapore | 1.773415058 | 2.769621116 | 7.390963209 | 12.69485513 | 20.74805403 | 40.04147691 | 67.28832986 | 122.9382184 | 245.6885096 | 474.5950604 | 770.4115145 | 1038.334379 | 1440.790882 | 1864.167294 | 2290.283696 | 2564.882417 | 2631.872897 | 2786.69712 | 2850.536038 |
| Slovakia | 1.767787267 | 2.059371874 | 5.274351085 | 16.15872374 | 40.13981782 | 82.5197695 | 150.3207 | 265.5100075 | 539.3259104 | 981.5754157 | 1508.194914 | 2317.664907 | 2975.786096 | 3403.398792 | 3914.47929 | 3959.995557 | 3595.78486 | 3026.306136 | 2361.317111 |
| Slovenia | 0.990942672 | 2.015781139 | 4.465252232 | 12.37631667 | 26.06016566 | 53.60272107 | 104.1618808 | 176.820692 | 332.2875546 | 677.7373993 | 978.512003 | 1509.448283 | 1998.742447 | 2647.755633 | 3051.285641 | 3279.593337 | 2971.188518 | 2747.772031 | 2690.556144 |
| Solomon Islands | 2.253840197 | 3.258391006 | 23.9987078 | 41.06025066 | 100.7713859 | 146.5757166 | 207.3818133 | 281.7865134 | 475.189499 | 630.4667068 | 799.4280537 | 887.5772585 | 1004.681012 | 1019.249584 | 1096.283041 | 1088.51344 | 1187.754606 | 630.4658509 | 1211.115886 |
| Somalia | 1.267278221 | 1.841580379 | 3.523923251 | 8.520276477 | 17.24813756 | 33.13815811 | 57.79931654 | 106.6913163 | 174.7261784 | 264.6695609 | 373.1946061 | 474.5598112 | 550.4924983 | 575.3040525 | 554.1143403 | 569.2462744 | 530.0817601 | 430.1209354 | 341.4700681 |
| South Africa | 3.38231839 | 1.132344767 | 4.57844298 | 14.57007311 | 37.25529968 | 82.55606096 | 119.2775245 | 167.5323467 | 240.8825392 | 420.6785935 | 636.5680644 | 853.6813504 | 1101.91458 | 1195.962328 | 1365.154005 | 1773.620789 | 1817.027257 | 1641.301931 | 1286.10178 |
| South Sudan | 2.448086553 | 3.328313297 | 5.838923263 | 14.46406407 | 29.5891085 | 58.5956622 | 96.18254741 | 160.0189586 | 264.3823965 | 415.9413076 | 602.5140614 | 841.0099054 | 1053.503463 | 1210.958058 | 1275.000191 | 1374.143713 | 1293.459771 | 1046.75152 | 856.8400622 |
| Spain | 2.252289583 | 2.345737595 | 4.237798585 | 11.03382849 | 24.65277502 | 54.72983169 | 98.22162725 | 179.370445 | 347.4629189 | 663.7406101 | 1005.324275 | 1392.254961 | 1788.260337 | 2145.588993 | 2713.151202 | 3132.768864 | 3612.919293 | 3692.964058 | 3556.487608 |
| Sri Lanka | 1.325023079 | 1.692809623 | 6.477951268 | 13.41345807 | 19.31198117 | 36.4375371 | 59.88005748 | 95.0972323 | 158.4758606 | 242.9841549 | 324.7222148 | 452.0053393 | 602.0541315 | 773.3000438 | 858.5087057 | 992.5394754 | 948.1812399 | 1026.988378 | 999.7929236 |
| Sudan | 2.205941324 | 2.399739534 | 5.718902125 | 12.90437106 | 24.68956121 | 53.40898864 | 85.31848956 | 136.3456566 | 214.5016792 | 324.2986652 | 433.4075677 | 594.6162719 | 723.6107342 | 872.2788917 | 925.760748 | 930.8655053 | 838.1769182 | 664.8856755 | 562.4507334 |
| Suriname | 3.330869552 | 4.858182561 | 19.58630572 | 29.20707137 | 59.98457461 | 116.7087975 | 192.9513369 | 279.1316835 | 412.8289627 | 674.8195196 | 998.2650584 | 1278.245432 | 1654.487312 | 1940.111185 | 2246.497315 | 2209.754018 | 2110.391271 | 1787.134499 | 1375.293423 |
| Sweden | 1.923943381 | 2.429612714 | 4.9776596 | 14.8980237 | 29.68576662 | 51.13743968 | 88.78190484 | 169.9820619 | 309.4535952 | 466.6339839 | 681.9426818 | 1111.160381 | 1492.646773 | 1936.072666 | 2496.575836 | 2804.710381 | 3006.930721 | 2873.338358 | 2311.195901 |
| Switzerland | 1.609787 | 2.056855518 | 4.106639771 | 10.31612292 | 18.72935396 | 39.89697081 | 63.8581845 | 124.3501998 | 225.845714 | 387.0699032 | 553.9446931 | 860.8062197 | 1162.204041 | 1421.749512 | 1699.887057 | 2113.015322 | 2362.821153 | 2226.790258 | 1917.04218 |
| Syrian Arab Republic | 5.438887066 | 6.125481391 | 11.51912819 | 17.73290789 | 32.39632098 | 51.91980452 | 71.48731552 | 105.9415322 | 167.6915147 | 241.7523064 | 334.1411028 | 477.0788156 | 578.7622717 | 706.5489887 | 815.3621501 | 922.4397605 | 1033.849899 | 838.144424 | 621.3376596 |
| Taiwan (Province of China) | 2.317293219 | 2.797266631 | 18.66328262 | 34.64519047 | 70.36250693 | 180.8424481 | 347.0231516 | 498.130249 | 736.2178242 | 1050.753568 | 1490.60367 | 1949.462048 | 2385.820746 | 3034.397426 | 3683.641794 | 4088.107527 | 4086.964526 | 3547.313027 | 3421.709425 |
| Tajikistan | 3.088710048 | 3.352345433 | 19.58277695 | 45.28833916 | 66.22672114 | 108.4212012 | 147.5267696 | 194.5110325 | 222.4833971 | 305.1525721 | 462.6081072 | 669.6774716 | 980.4354198 | 1273.820979 | 1610.499067 | 1821.369469 | 1215.447267 | 935.7469984 | 640.5592464 |
| Thailand | 2.153571137 | 3.639040605 | 12.64283206 | 25.10677534 | 50.7415043 | 110.8820876 | 144.76351 | 204.2247063 | 315.0614241 | 450.4335691 | 598.2734209 | 799.4482455 | 1017.084906 | 1210.86182 | 1339.940389 | 1451.296921 | 1393.370871 | 1392.408328 | 1525.943062 |
| Timor-Leste | 3.193270551 | 4.633479589 | 16.88672309 | 30.14698682 | 44.8990767 | 86.20721732 | 126.6945279 | 201.3621247 | 328.3785616 | 561.4186958 | 758.9526464 | 1037.581699 | 1279.897913 | 1474.079328 | 1590.550272 | 1597.233615 | 1543.337899 | 1228.491314 | 1182.258955 |
| Togo | 2.725908194 | 3.243529347 | 5.347454495 | 17.01217253 | 17.73811878 | 40.22721066 | 86.40134379 | 106.5744645 | 190.0339623 | 317.1590477 | 401.7177983 | 595.5239786 | 747.8284503 | 881.2723477 | 1131.084447 | 1327.078007 | 1052.026114 | 947.7698841 | 831.7296821 |
| Tokelau | 1.523808955 | 2.086401521 | 15.50426829 | 26.33828683 | 64.70056257 | 98.54773906 | 133.7648013 | 195.1780468 | 327.8489116 | 473.7496169 | 678.3265783 | 804.0787244 | 998.3762385 | 1089.046092 | 1331.863243 | 1486.317043 | 1819.044778 | 1117.990928 | 1992.977273 |
| Tonga | 1.298111197 | 1.445376274 | 9.291766378 | 12.54260453 | 28.12754749 | 45.04317039 | 68.1657176 | 97.39360515 | 184.9359702 | 278.7393428 | 422.1677956 | 514.5599169 | 625.3155339 | 681.2259481 | 842.4728885 | 1026.495364 | 1249.823703 | 831.6531846 | 1300.956581 |
| Trinidad and Tobago | 3.280970891 | 3.195906666 | 15.08170717 | 33.27393667 | 50.61808976 | 127.364444 | 170.0063493 | 236.6568201 | 335.1367684 | 550.1386087 | 854.8554333 | 1158.298802 | 1368.97399 | 1607.536992 | 1937.047184 | 1821.076045 | 1889.865322 | 1794.876259 | 1569.968087 |
| Tunisia | 2.286781463 | 2.50228847 | 4.76104778 | 12.03999074 | 22.93605189 | 54.97615885 | 87.92640553 | 145.9201177 | 229.0233216 | 351.6980702 | 535.4838086 | 755.4364944 | 933.1336935 | 1150.859051 | 1209.833167 | 1518.707835 | 1566.819257 | 1385.788661 | 1214.107864 |
| Turkey | 4.176509571 | 4.273852417 | 9.892632948 | 21.67956601 | 43.93641274 | 80.33026272 | 132.1170511 | 210.6264337 | 326.4403322 | 507.104814 | 728.5542136 | 1029.19338 | 1269.086878 | 1651.900991 | 1799.950832 | 1925.604981 | 1869.058536 | 1506.023446 | 1267.613672 |
| Turkmenistan | 1.488517135 | 1.786528802 | 13.7862833 | 31.91490659 | 51.15585937 | 72.10723147 | 104.0461332 | 150.3186142 | 209.9432113 | 280.6913661 | 404.5836641 | 564.7446852 | 652.5910436 | 867.154355 | 944.9049237 | 1067.338398 | 792.7425955 | 694.1322552 | 536.0067089 |
| Tuvalu | 2.054960853 | 2.420014483 | 17.32304182 | 31.16746722 | 72.47358746 | 113.9115421 | 156.6416313 | 220.5385332 | 367.667308 | 496.2376193 | 691.206813 | 841.5735697 | 1012.842589 | 1095.9324 | 1263.134542 | 1439.058327 | 1705.456822 | 1040.897952 | 1868.22007 |
| Uganda | 2.324787957 | 3.732581955 | 8.610905434 | 20.75494334 | 40.07040328 | 78.25471811 | 126.2753987 | 211.2505507 | 344.9504256 | 517.1018297 | 749.5467821 | 1015.929352 | 1269.602801 | 1352.984374 | 1394.614725 | 1469.826549 | 1375.17107 | 1158.034274 | 958.9891711 |
| Ukraine | 2.617078906 | 4.378844322 | 26.04238212 | 42.93757957 | 72.7708335 | 126.0470179 | 217.2676414 | 375.7184757 | 610.4047819 | 987.2895049 | 1523.18327 | 2074.560437 | 2473.906584 | 2584.877415 | 2444.331368 | 1698.759785 | 1260.004723 | 978.5439344 | 719.2868966 |
| United Arab Emirates | 0.906117869 | 1.103475147 | 3.044815372 | 11.44228706 | 21.13546349 | 49.91442603 | 83.69863332 | 148.0229107 | 280.464553 | 450.8264399 | 809.948984 | 1093.982393 | 1554.378468 | 1988.503086 | 1958.209308 | 2919.982128 | 3930.640611 | 3827.945024 | 3659.798073 |
| United Kingdom | 1.793777745 | 2.076174745 | 4.420727887 | 13.13709388 | 36.4186923 | 75.81851281 | 118.1215041 | 197.9415994 | 337.9627746 | 560.5625178 | 854.7043057 | 1249.610227 | 1612.713644 | 2067.548428 | 2562.051141 | 3120.525117 | 3513.651837 | 3778.57632 | 3915.703493 |
| United Republic of Tanzania | 2.425903747 | 3.473049279 | 6.347957677 | 15.48420397 | 31.46595486 | 61.4652778 | 98.74835783 | 165.4438506 | 268.6211471 | 421.4514244 | 608.3215104 | 818.0945025 | 1011.281445 | 1131.764029 | 1153.722573 | 1254.449975 | 1184.88251 | 1003.298894 | 838.2755681 |
| United States of America | 1.770153453 | 2.030147526 | 5.053725964 | 15.36302154 | 35.92709253 | 81.43570922 | 143.7404067 | 263.1224717 | 440.7121823 | 701.786125 | 959.6189943 | 1223.965879 | 1399.876499 | 1651.080773 | 1926.113755 | 2167.90949 | 2341.34583 | 2337.338954 | 2257.003932 |
| United States Virgin Islands | 3.070591141 | 3.51150446 | 16.23844086 | 28.39934716 | 45.90828938 | 101.749802 | 193.0364494 | 366.2725675 | 632.3320199 | 1051.875835 | 1541.182263 | 2080.848299 | 2598.598811 | 3100.817514 | 3637.725856 | 3912.358908 | 4117.852212 | 3896.075578 | 3319.741108 |
| Uruguay | 1.89901624 | 3.257858925 | 13.68000352 | 34.40420649 | 57.55402751 | 114.8662292 | 192.657255 | 296.9755536 | 499.4853711 | 832.9961122 | 1272.751692 | 1855.863461 | 2456.436887 | 3216.548629 | 3676.001616 | 4034.181492 | 4501.959705 | 4340.35751 | 4188.928949 |
| Uzbekistan | 2.159914955 | 2.376930028 | 14.2021234 | 30.55653873 | 49.5211877 | 91.58381653 | 121.4437975 | 162.6546358 | 243.6413588 | 339.5862294 | 488.8070915 | 720.2089413 | 765.0917748 | 1059.847828 | 1448.107058 | 2068.452044 | 1880.406755 | 1304.793781 | 950.8854312 |
| Vanuatu | 2.305117888 | 2.509461486 | 16.88268253 | 27.55180593 | 61.09393839 | 95.45023136 | 133.6961276 | 192.8391315 | 325.3294074 | 449.4751142 | 611.3816794 | 746.8040071 | 890.0587606 | 945.2923088 | 1054.594317 | 1143.862479 | 1380.020857 | 817.1737825 | 1517.390924 |
| Venezuela (Bolivarian Republic of) | 1.864636548 | 3.25385115 | 17.90583334 | 37.38932067 | 55.36223928 | 82.0290072 | 122.0442204 | 183.9096717 | 299.1485482 | 485.5125478 | 691.8317651 | 942.6966957 | 1152.20532 | 1405.118522 | 1603.333807 | 1567.901681 | 1312.939253 | 1073.91946 | 973.3442768 |
| Viet Nam | 1.742768872 | 2.42667878 | 11.55674635 | 21.70122422 | 38.65761435 | 84.95460396 | 154.0168452 | 291.3040838 | 524.6468869 | 895.4679674 | 1245.891803 | 1669.772301 | 1911.118885 | 2084.432851 | 2104.94928 | 2143.082265 | 2080.567187 | 1562.867964 | 1406.098117 |
| Yemen | 1.691159684 | 1.938704234 | 3.474286886 | 8.547930182 | 18.68392867 | 42.75174194 | 75.38378845 | 135.8038637 | 222.8602572 | 331.1149338 | 438.7370414 | 578.6801486 | 679.4560267 | 800.5890934 | 835.862313 | 827.5755746 | 753.607107 | 613.3110645 | 526.7806482 |
| Zambia | 2.391894814 | 3.457951121 | 8.711380888 | 22.07637929 | 45.39687132 | 90.35758289 | 148.9646068 | 255.9345322 | 410.6117594 | 611.8222072 | 856.5904656 | 1122.817881 | 1330.548244 | 1432.824396 | 1443.473332 | 1550.790653 | 1557.838749 | 1298.264429 | 1072.027788 |
| Zimbabwe | 2.521357331 | 3.294177081 | 9.343360142 | 20.28976895 | 41.84213319 | 86.39346322 | 148.5609641 | 250.9891451 | 409.5677763 | 596.5227072 | 771.6511374 | 1028.002906 | 1256.204676 | 1501.62998 | 1750.282668 | 1741.229958 | 1670.812528 | 1389.733072 | 1002.970372 |

**Table S6** The death cases and age-standardized death rate of Colorectal cancer in 1990 and 2019, and its temporal trends from 1990 to 2019.

| nation | sex | Death Case NO(95% UI) | | Change in absolute number (%) | ASDR per 100,000 No. (95% UI) | | 1990-2019 EAPC No.(95 CI) |
| --- | --- | --- | --- | --- | --- | --- | --- |
| 1990 | 2019 | 1990 | 2019 |
| Afghanistan | both | 538.72(324.41-818.22) | 1045.91(685.6-1420.21) | 94.15 | 7.87(5-11.76) | 8.43(6.01-11.18) | 0.45(from 0.24 to 0.66) |
| Albania | both | 169.92(157.35-182.06) | 385.19(290.5-501.54) | 126.69 | 8.63(7.94-9.26) | 9.15(6.96-11.89) | 0.59(from 0.33 to 0.86) |
| Algeria | both | 744.05(603.63-900.89) | 2383.75(1888.55-2951.45) | 220.38 | 7.24(6-8.56) | 8.05(6.4-9.77) | 0.44(from 0.4 to 0.49) |
| American Samoa | both | 3.23(2.64-3.77) | 7.19(6.08-8.55) | 122.59 | 16.3(13.31-19.03) | 16.55(14.07-19.59) | 0.14(from 0.02 to 0.27) |
| Andorra | both | 14.15(11.1-18.88) | 33.66(26.28-42.23) | 137.9 | 28.75(22.82-37.96) | 22.97(17.88-28.86) | -0.82(from -0.87 to -0.77) |
| Angola | both | 284.71(200.75-412.45) | 952.23(737.94-1211.66) | 234.45 | 8.01(5.61-11.18) | 9.65(7.82-11.99) | 0.74(from 0.57 to 0.91) |
| Antigua and Barbuda | both | 6.65(6.03-7.24) | 15.05(13.07-17.27) | 126.53 | 11.99(10.88-13.04) | 16.16(14.01-18.45) | 0.94(from 0.79 to 1.08) |
| Argentina | both | 6593.19(6296.25-6834.41) | 12886.35(12008.44-13759.11) | 95.45 | 21.15(20.15-21.96) | 23.59(22-25.13) | 0.26(from 0.12 to 0.41) |
| Armenia | both | 371.51(354.24-391.5) | 585.12(492.14-680.56) | 57.5 | 13.97(13.3-14.72) | 14.3(12.07-16.63) | 0.08(from -0.04 to 0.2) |
| Australia | both | 4497.46(4289.48-4641.85) | 6734.33(6064.85-7265.17) | 49.74 | 23.38(22.22-24.16) | 15.49(14.08-16.66) | -1.79(from -1.95 to -1.63) |
| Austria | both | 3276.45(3116.67-3388.43) | 2603.19(2355.01-2811.01) | -20.55 | 27.16(25.84-28.08) | 13.54(12.36-14.54) | -2.81(from -2.95 to -2.68) |
| Azerbaijan | both | 540.58(500.15-581.29) | 1062.59(874.52-1303.92) | 96.57 | 10.55(9.75-11.34) | 12.2(9.77-15.16) | 1.09(from 0.6 to 1.58) |
| Bahamas | both | 25.47(23.41-27.66) | 67.69(55.38-82.22) | 165.77 | 17.23(15.84-18.71) | 18.41(15.08-22.19) | 0.49(from 0.38 to 0.59) |
| Bahrain | both | 19.02(15.73-22.44) | 83.87(64.08-106.32) | 340.92 | 12.44(10.41-14.49) | 11.42(9.08-14.03) | -0.44(from -0.73 to -0.16) |
| Bangladesh | both | 2046.51(1502.43-2725.47) | 6023.03(4165.99-8610.58) | 194.31 | 4.62(3.36-6.25) | 4.94(3.4-7.07) | 0.14(from 0 to 0.29) |
| Barbados | both | 52.27(48.24-55.86) | 118.03(98.96-139.26) | 125.79 | 17.46(16.16-18.58) | 23.96(20.09-28.31) | 1.08(from 0.87 to 1.28) |
| Belarus | both | 2246.06(2156.7-2335.33) | 2734.02(2230.37-3444.61) | 21.73 | 17.47(16.78-18.15) | 17.03(13.86-21.48) | -0.85(from -1.14 to -0.56) |
| Belgium | both | 3997.87(3747.11-4183.14) | 4324.83(3879.72-4686.77) | 8.18 | 25.61(23.99-26.79) | 17.1(15.59-18.44) | -1.54(from -1.65 to -1.43) |
| Belize | both | 6.38(5.81-6.97) | 27.53(23.98-31.67) | 331.36 | 7.02(6.37-7.68) | 10.42(9.02-11.99) | 1.23(from 0.78 to 1.68) |
| Benin | both | 121.68(103.15-143.4) | 330.91(261.29-423.04) | 171.95 | 6.47(5.5-7.59) | 7.63(6.19-9.53) | 0.68(from 0.63 to 0.72) |
| Bermuda | both | 16.14(14.81-17.41) | 25.53(21.35-30.84) | 58.15 | 27.25(24.93-29.34) | 18.81(15.73-22.69) | -1.26(from -1.37 to -1.15) |
| Bhutan | both | 10.14(5.77-14.66) | 35.92(22.13-48.73) | 254.22 | 4.61(2.64-6.5) | 6.97(4.39-9.42) | 1.44(from 1.42 to 1.46) |
| Bolivia (Plurinational State of) | both | 260.65(187.14-325.97) | 992.35(677.94-1313.81) | 280.72 | 8.85(6.49-10.99) | 12.26(8.43-16.2) | 1.07(from 1.03 to 1.11) |
| Bosnia and Herzegovina | both | 543.67(515.06-576.46) | 1318.83(1044.25-1638.71) | 142.58 | 14.4(13.54-15.31) | 22.32(17.81-27.66) | 1.88(from 1.6 to 2.17) |
| Botswana | both | 53.57(40.9-69.72) | 188.75(132.56-252.19) | 252.37 | 10.69(8.29-13.76) | 15.75(11.59-20.48) | 1.06(from 0.77 to 1.35) |
| Brazil | both | 8340.09(7991.86-8610.33) | 27051.84(25084.83-28402.95) | 224.36 | 10.21(9.68-10.57) | 11.67(10.81-12.28) | 0.55(from 0.4 to 0.71) |
| Brunei Darussalam | both | 25.23(21.18-29.72) | 72.47(63.86-82.05) | 187.21 | 30.25(25.59-35.26) | 30.26(26.58-34.1) | 0.67(from 0.4 to 0.94) |
| Bulgaria | both | 2366.46(2246.69-2484.03) | 3671.6(2991.28-4477.36) | 55.15 | 19.4(18.4-20.31) | 25.11(20.41-30.62) | 2.15(from 1.67 to 2.64) |
| Burkina Faso | both | 227.95(182.23-286.37) | 584.78(460.79-742.02) | 156.54 | 5.87(4.75-7.37) | 7.27(5.82-9.12) | 0.77(from 0.63 to 0.92) |
| Burundi | both | 180.24(143.31-230.52) | 303(215.73-438.2) | 68.11 | 8.02(6.44-10.12) | 7.17(5.21-10.11) | -0.54(from -0.63 to -0.45) |
| Cabo Verde | both | 10.57(9.44-11.79) | 47.28(37.72-55.73) | 347.33 | 4.49(4.04-4.97) | 11.35(8.97-13.38) | 2.64(from 2.29 to 2.98) |
| Cambodia | both | 389.65(302.72-505.88) | 1561.46(1240.48-1880.72) | 300.74 | 9.03(7.24-11.72) | 14.02(11.24-16.54) | 1.58(from 1.53 to 1.64) |
| Cameroon | both | 364.11(288.5-445.22) | 1114.28(837.93-1460.03) | 206.03 | 9.19(7.28-11.17) | 10.64(8.25-13.84) | 0.58(from 0.53 to 0.62) |
| Canada | both | 6314.85(5952.89-6544.02) | 11616.19(10432.9-12531.83) | 83.95 | 19.6(18.42-20.3) | 16.22(14.74-17.44) | -0.67(from -0.72 to -0.61) |
| Central African Republic | both | 80.88(59.75-104.15) | 128.44(92.28-178.39) | 58.8 | 7.43(5.78-9.42) | 6.37(4.71-8.79) | -0.44(from -0.5 to -0.38) |
| Chad | both | 141.71(109.99-177.1) | 369.41(285.06-480.08) | 160.68 | 5.33(4.13-6.66) | 7.37(5.77-9.35) | 1.27(from 1.2 to 1.34) |
| Chile | both | 1166.89(1104.62-1215.14) | 3523.63(3224.21-3795.01) | 201.97 | 12.69(11.97-13.22) | 14.71(13.46-15.85) | 0.74(from 0.65 to 0.83) |
| China | both | 79322.16(69661.31-89294.63) | 261776.61(224403.78-303317.85) | 230.02 | 10.18(9.03-11.37) | 13.86(11.92-16.01) | 1.39(from 1.14 to 1.63) |
| Colombia | both | 1544.07(1468.67-1612) | 5137.86(3989.83-6531.61) | 232.75 | 9.43(8.85-9.89) | 9.63(7.48-12.24) | 0.01(from -0.09 to 0.11) |
| Comoros | both | 16.35(9.88-21.93) | 39.39(29.02-50.28) | 141 | 7.87(5.04-10.42) | 8.56(6.39-10.8) | 0.17(from 0.07 to 0.27) |
| Congo | both | 115.57(76.92-153.64) | 265.89(196.56-352.42) | 130.06 | 11.76(8.29-15.34) | 11.4(8.76-14.52) | -0.17(from -0.36 to 0.02) |
| Cook Islands | both | 0.97(0.8-1.14) | 1.86(1.57-2.22) | 92.07 | 8.39(7.01-9.8) | 7.77(6.54-9.34) | -0.37(from -0.58 to -0.16) |
| Costa Rica | both | 163.92(152.26-173.74) | 787.55(621.88-985.71) | 380.46 | 9.67(8.94-10.28) | 15.38(12.15-19.28) | 1.72(from 1.6 to 1.84) |
| Croatia | both | 1386.53(1304.11-1471.55) | 2308.47(1842.91-2847.48) | 66.49 | 22.69(21.28-24.04) | 25.28(20.14-31.22) | 0.73(from 0.54 to 0.92) |
| Cuba | both | 1571.1(1485.49-1635.1) | 3480.56(2883.16-4186.1) | 121.54 | 15.5(14.61-16.16) | 17.83(14.73-21.48) | 0.44(from 0.31 to 0.57) |
| Cyprus | both | 95.95(84.48-108.98) | 265.29(229.77-301.34) | 176.48 | 13.28(11.7-15.1) | 14.32(12.4-16.32) | 0.5(from 0.28 to 0.73) |
| Czechia | both | 4644.16(4474.83-4784.55) | 4677.62(3863.77-5626.32) | 0.72 | 33.76(32.41-34.8) | 21.58(17.8-25.98) | -1.69(from -1.88 to -1.5) |
| C么te d'Ivoire | both | 307.49(238.12-393.3) | 850.12(663.32-1066.15) | 176.47 | 8.89(6.99-11.28) | 9.41(7.62-11.47) | -0.02(from -0.12 to 0.08) |
| Democratic People's Republic of Korea | both | 1642.04(1250.8-2129.57) | 3442.02(2575.57-4379.76) | 109.62 | 10.62(8.4-13.46) | 10.89(8.14-13.82) | 0.19(from 0.13 to 0.26) |
| Democratic Republic of the Congo | both | 947.29(737.54-1271.7) | 1995.19(1338.66-2956.22) | 110.62 | 6.87(5.3-9.63) | 6.23(4.15-9.51) | -0.49(from -0.81 to -0.17) |
| Denmark | both | 2045.97(1947.44-2121.78) | 2646.84(2395.73-2871.78) | 29.37 | 24.5(23.43-25.37) | 21.75(19.76-23.49) | -0.81(from -1.04 to -0.58) |
| Djibouti | both | 11.24(7.71-15.55) | 59.46(43.01-81.73) | 428.94 | 9(6.42-12.11) | 11.19(8.66-14.66) | 0.78(from 0.72 to 0.83) |
| Dominica | both | 8.91(7.9-9.93) | 13.57(11.29-16.4) | 52.31 | 12.12(10.75-13.52) | 14.96(12.42-18.09) | 0.94(from 0.87 to 1.01) |
| Dominican Republic | both | 258.79(227.98-291.08) | 1114.67(822.64-1447.6) | 330.73 | 7.56(6.6-8.51) | 12.42(9.23-16.14) | 2.4(from 2.19 to 2.61) |
| Ecuador | both | 366.34(343.28-388.02) | 1602.87(1284.55-2008.26) | 337.54 | 7.37(6.85-7.83) | 11.34(9.07-14.16) | 2.09(from 1.78 to 2.4) |
| Egypt | both | 1551.98(1423.28-1679.76) | 4557.28(3299.69-6274.67) | 193.64 | 5.46(4.95-5.89) | 7.45(5.4-10.11) | 1.12(from 1.04 to 1.19) |
| El Salvador | both | 141.34(130.07-151.4) | 551.88(426.22-710.22) | 290.46 | 4.82(4.4-5.18) | 9.05(6.98-11.68) | 2.03(from 1.71 to 2.35) |
| Equatorial Guinea | both | 12.03(8.24-16.53) | 60.78(37.9-88.74) | 405.35 | 6.52(4.46-8.78) | 14.24(9.12-20.02) | 3.51(from 3.23 to 3.8) |
| Eritrea | both | 62.25(43.85-83.19) | 247.46(189.31-321.61) | 297.54 | 6.55(4.74-8.79) | 9.97(7.87-12.7) | 1.19(from 0.91 to 1.48) |
| Estonia | both | 396.06(377.53-413.51) | 527.97(424.64-660.09) | 33.31 | 19.42(18.49-20.27) | 18.51(14.81-23.22) | -0.1(from -0.31 to 0.11) |
| Eswatini | both | 26.6(20.29-34.4) | 69.56(46.72-95.83) | 161.47 | 10.24(7.87-13.05) | 13.52(9.32-18.23) | 1.06(from 0.71 to 1.42) |
| Ethiopia | both | 1405.36(1007.79-2166.43) | 2854.9(2127.77-4003.37) | 103.14 | 7.33(5.07-11.43) | 7.33(5.47-10.36) | -0.1(from -0.34 to 0.14) |
| Fiji | both | 29.94(24.45-36.22) | 74.53(59.18-92.56) | 148.96 | 9.36(7.69-11.17) | 11.65(9.51-14.2) | 0.89(from 0.71 to 1.07) |
| Finland | both | 1050.13(995.04-1092.68) | 1615.71(1455.4-1756.19) | 53.86 | 14.62(13.81-15.22) | 12.33(11.25-13.35) | -0.66(from -0.72 to -0.6) |
| France | both | 20261.27(19037.14-21245.52) | 25496.72(22330.21-27995.55) | 25.84 | 23.53(22.15-24.58) | 16.41(14.69-17.82) | -1.42(from -1.49 to -1.35) |
| Gabon | both | 74.96(49.72-111.5) | 141.24(103.31-176.73) | 88.43 | 14.37(9.71-21.11) | 14.86(11.25-18.24) | -0.01(from -0.08 to 0.06) |
| Gambia | both | 14.96(11.58-18.96) | 58.37(42.67-77.74) | 290.21 | 4.72(3.77-5.81) | 6.56(4.78-8.76) | 0.99(from 0.85 to 1.14) |
| Georgia | both | 673.05(618.5-731.49) | 782.23(659.19-913.49) | 16.22 | 11.08(10.21-12.04) | 13.19(11.08-15.44) | 1.66(from 1.11 to 2.2) |
| Germany | both | 31780.05(30043.24-33032.25) | 37551.54(34130.67-40326.31) | 18.16 | 24.4(23.04-25.31) | 18.01(16.54-19.26) | -1.45(from -2.06 to -0.84) |
| Ghana | both | 353.51(288.17-433.06) | 1272.76(1002.72-1614.58) | 260.03 | 6.28(5.21-7.6) | 8.76(6.96-10.92) | 1.19(from 1.16 to 1.22) |
| Greece | both | 2132.23(2016.52-2227.09) | 4000.11(3599.73-4304.91) | 87.6 | 14.19(13.35-14.86) | 14.87(13.67-15.87) | -0.36(from -0.58 to -0.13) |
| Greenland | both | 9.27(8.19-10.53) | 19.8(16.3-23.51) | 113.5 | 29.76(26.59-33.5) | 31.38(26.04-37.13) | -0.25(from -0.56 to 0.06) |
| Grenada | both | 10.75(9.77-11.78) | 19.97(18.09-21.89) | 85.71 | 14.21(12.93-15.52) | 19.29(17.44-21.14) | 1.16(from 1.03 to 1.28) |
| Guam | both | 10.69(9.03-12.41) | 26.51(22.38-31.39) | 148.06 | 17.11(13.91-20.21) | 14.16(12.02-16.74) | -0.64(from -1.02 to -0.26) |
| Guatemala | both | 167.92(148.76-187.31) | 965.05(771.25-1207.56) | 474.71 | 5.11(4.57-5.65) | 9.09(7.32-11.27) | 1.87(from 1.54 to 2.21) |
| Guinea | both | 176.43(147.92-205.41) | 369.87(281.78-480.38) | 109.64 | 5.74(4.81-6.67) | 7.24(5.51-9.24) | 0.89(from 0.86 to 0.92) |
| Guinea-Bissau | both | 32.53(22.45-41.42) | 58.63(43.7-74.24) | 80.25 | 8.56(6.18-10.77) | 9.06(6.93-11.29) | 0.24(from 0.2 to 0.28) |
| Guyana | both | 45.56(39.77-51.54) | 85.39(67.59-107.24) | 87.45 | 12.75(11.2-14.37) | 14.68(11.87-18.25) | 0.42(from 0.27 to 0.58) |
| Haiti | both | 301.5(196.94-369.78) | 671.2(467.25-917.47) | 122.62 | 10.03(6.7-12.14) | 10.53(7.33-14.09) | 0.35(from 0.26 to 0.43) |
| Honduras | both | 95.27(76.47-111.07) | 430.12(302.9-605.14) | 351.5 | 4.7(3.72-5.53) | 7.65(5.34-10.67) | 1.77(from 1.64 to 1.91) |
| Hungary | both | 4421.13(4239.38-4587.42) | 5646.02(4698.99-6699.7) | 27.71 | 30.7(29.38-31.89) | 28.56(23.65-34.03) | -0.44(from -0.61 to -0.26) |
| Iceland | both | 43.08(39.62-46.17) | 69.79(60.81-78.21) | 62.01 | 14.7(13.54-15.74) | 11.81(10.53-13.16) | -0.93(from -1.11 to -0.76) |
| India | both | 21971.06(19161.8-25094.89) | 79097.99(67137.46-92723.53) | 260.01 | 5.47(4.77-6.25) | 7.5(6.35-8.76) | 0.91(from 0.77 to 1.06) |
| Indonesia | both | 8267.24(6314.55-9806.57) | 30241.67(20641.68-38807.12) | 265.8 | 8.94(6.9-10.57) | 15.58(10.54-19.86) | 1.92(from 1.83 to 2.02) |
| Iran (Islamic Republic of) | both | 1665.01(1369.38-1996.74) | 6413.14(5903.16-6907.73) | 285.17 | 7.17(5.85-8.59) | 9.31(8.53-10.08) | 1.11(from 0.95 to 1.27) |
| Iraq | both | 541.17(394.86-739.14) | 1797.29(1401.39-2257.99) | 232.11 | 7.2(5.27-9.77) | 8.32(6.58-10.16) | 0.72(from 0.52 to 0.93) |
| Ireland | both | 1035.49(991.33-1075.65) | 1377.03(1241.75-1497.68) | 32.98 | 25.68(24.49-26.65) | 18.01(16.26-19.51) | -1.38(from -1.44 to -1.32) |
| Israel | both | 1036.01(976.25-1085.06) | 2007.88(1796.58-2172.02) | 93.81 | 22.01(20.69-23.07) | 16.56(14.91-17.85) | -1.8(from -2.11 to -1.48) |
| Italy | both | 17359.63(16678.44-17759.43) | 24877.29(22016.36-26457.11) | 43.31 | 19.47(18.63-19.95) | 15.83(14.41-16.7) | -0.89(from -1 to -0.77) |
| Jamaica | both | 193.35(179.07-205.63) | 500.73(405.39-615.47) | 158.98 | 10.65(9.88-11.32) | 16.52(13.35-20.35) | 1.64(from 1.34 to 1.93) |
| Japan | both | 30607.54(29005.45-31367.7) | 63742.03(53255.69-69583.94) | 108.26 | 18.7(17.61-19.23) | 15.85(13.93-16.93) | -0.68(from -0.73 to -0.63) |
| Jordan | both | 153.96(125.23-188.03) | 753.93(628.46-901.19) | 389.7 | 12.41(9.99-15.13) | 13.07(10.93-15.46) | 0.35(from 0.24 to 0.45) |
| Kazakhstan | both | 1881(1787.73-1974.92) | 2190.13(1905.73-2490.52) | 16.43 | 15.15(14.37-15.9) | 13.5(11.79-15.28) | -0.17(from -0.32 to -0.02) |
| Kenya | both | 392.07(255.39-486.15) | 1627.91(1282.45-2038.47) | 315.21 | 5.13(3.36-6.37) | 8.14(6.52-10.04) | 1.95(from 1.77 to 2.14) |
| Kiribati | both | 3.84(3.1-4.65) | 6.64(4.94-8.84) | 72.85 | 10.85(8.88-12.99) | 10.76(8.26-14.05) | -0.2(from -0.26 to -0.14) |
| Kuwait | both | 40.1(35.84-44.19) | 223.23(187.33-265.37) | 456.67 | 7.36(6.44-8.29) | 10.14(8.41-12.04) | 1.93(from 1.46 to 2.41) |
| Kyrgyzstan | both | 342.59(321.05-365.8) | 345.78(303.56-393.88) | 0.93 | 11.34(10.63-12.12) | 8.24(7.25-9.34) | -1.17(from -1.38 to -0.96) |
| Lao People's Democratic Republic | both | 205.9(139.18-273.87) | 545.37(388.58-720.61) | 164.87 | 10.23(7.16-13.55) | 13.33(9.6-17.23) | 0.76(from 0.7 to 0.82) |
| Latvia | both | 643.09(616.33-667.92) | 745.56(625.83-891.45) | 15.94 | 17.98(17.21-18.68) | 17.63(14.77-21.21) | -0.07(from -0.33 to 0.18) |
| Lebanon | both | 274.59(216.01-346.43) | 910.37(739.52-1198.68) | 231.54 | 13.42(10.63-16.76) | 17.55(14.26-23.15) | 1.45(from 1.27 to 1.63) |
| Lesotho | both | 57.85(45.37-83.1) | 132.43(95.72-174.03) | 128.94 | 6.52(5.12-9.38) | 11.67(8.66-15.1) | 2.43(from 2.25 to 2.61) |
| Liberia | both | 70.01(58.26-84.06) | 119.94(81.32-171.09) | 71.32 | 6.81(5.74-8.13) | 6.68(4.57-9.51) | 0.43(from 0.09 to 0.78) |
| Libya | both | 216.12(153.75-312.52) | 620.28(452.34-800.7) | 187 | 11.93(8.5-17.2) | 12.45(9.07-15.84) | 0.37(from 0.21 to 0.52) |
| Lithuania | both | 746.05(714.55-780.24) | 1024.4(857.04-1220.52) | 37.31 | 16.62(15.9-17.38) | 16.9(14.05-20.27) | 0.09(from -0.11 to 0.29) |
| Luxembourg | both | 146.92(137.81-155.6) | 169.51(146.57-192.12) | 15.38 | 27(25.25-28.53) | 15.97(13.87-18.08) | -1.99(from -2.16 to -1.81) |
| Madagascar | both | 332.58(269.18-390.53) | 714.38(527.75-957.26) | 114.8 | 6.82(5.56-7.9) | 7.11(5.27-9.34) | 0.08(from 0.02 to 0.15) |
| Malawi | both | 165.03(138.57-191.03) | 401.62(307.71-507.18) | 143.36 | 4.76(4.03-5.41) | 6.06(4.74-7.49) | 0.97(from 0.82 to 1.12) |
| Malaysia | both | 1367.95(1199.58-1544.34) | 4837.79(3829.05-5961.92) | 253.65 | 16.26(14.03-18.72) | 20.32(16.15-24.85) | 0.17(from -0.06 to 0.39) |
| Maldives | both | 7.2(5.13-9.16) | 23.56(19.34-27.93) | 227.4 | 9.2(6.96-11.44) | 8.71(7.13-10.38) | -0.66(from -0.83 to -0.48) |
| Mali | both | 248.45(210.15-289.8) | 614.98(486.87-772.55) | 147.52 | 6.54(5.56-7.59) | 7.84(6.29-9.73) | 0.64(from 0.59 to 0.69) |
| Malta | both | 70.49(65.49-75.05) | 136.44(119.54-154.43) | 93.56 | 17(15.79-18.12) | 14.08(12.38-15.89) | -0.58(from -0.68 to -0.48) |
| Marshall Islands | both | 1.66(1.38-2) | 3.74(2.8-4.86) | 124.67 | 10.9(8.99-13.23) | 12.29(9.55-15.44) | 0.45(from 0.4 to 0.51) |
| Mauritania | both | 79.94(59.83-98) | 155.68(119.43-195.36) | 94.75 | 8.57(6.45-10.46) | 8.35(6.53-10.34) | 0.02(from -0.13 to 0.17) |
| Mauritius | both | 56.09(52.62-59.91) | 214.66(175.91-261.42) | 282.69 | 8.21(7.67-8.77) | 12.77(10.53-15.5) | 1.53(from 1.38 to 1.67) |
| Mexico | both | 2600.48(2495.5-2669.98) | 10517.77(9035.77-12022.02) | 304.45 | 6.52(6.18-6.73) | 9.24(7.95-10.52) | 1.3(from 1.21 to 1.39) |
| Micronesia (Federated States of) | both | 4.88(3.74-6.17) | 8.12(5.65-10.73) | 66.25 | 11.29(8.71-14.05) | 13.08(9.5-16.86) | 0.44(from 0.41 to 0.46) |
| Monaco | both | 17.09(13.62-20.56) | 25.37(20.68-29.89) | 48.49 | 22.69(18.18-27.39) | 24.27(19.64-28.78) | 0.35(from 0.25 to 0.44) |
| Mongolia | both | 88.88(73-105.48) | 192.95(150.35-248.36) | 117.1 | 8.76(7.23-10.35) | 9.31(7.44-11.69) | -0.22(from -0.37 to -0.07) |
| Montenegro | both | 85.68(72.39-97.71) | 168.06(137.42-200.16) | 96.14 | 14.21(12.03-16.2) | 17.23(14.08-20.4) | 1(from 0.92 to 1.09) |
| Morocco | both | 807.21(642.75-943.34) | 2481.63(1856.36-3110.29) | 207.43 | 6.25(4.88-7.34) | 8.48(6.31-10.51) | 1.01(from 0.86 to 1.16) |
| Mozambique | both | 265.81(219.62-315.93) | 832.49(607.07-1091.9) | 213.19 | 5.15(4.31-6) | 8.66(6.46-11.2) | 2.23(from 2.09 to 2.37) |
| Myanmar | both | 1989.22(1548.06-2705.4) | 5581.81(4134.72-7152.29) | 180.6 | 8.91(7.02-12.1) | 12.82(9.6-16.23) | 1.4(from 1.31 to 1.49) |
| Namibia | both | 38.47(30.78-46.74) | 112.78(89.16-142.59) | 193.16 | 5.74(4.64-6.91) | 8.68(6.97-10.81) | 1.57(from 1.47 to 1.67) |
| Nauru | both | 0.63(0.41-0.9) | 0.62(0.4-0.82) | -1.39 | 18.15(12.23-25.69) | 16.55(11.75-21.15) | -0.48(from -0.72 to -0.25) |
| Nepal | both | 313.37(207.69-435.12) | 1084.43(781.32-1501.28) | 246.05 | 3.62(2.33-5.14) | 5.4(3.89-7.42) | 1.42(from 1.21 to 1.64) |
| Netherlands | both | 4657.96(4377.58-4845.56) | 7774.38(7036.41-8443.66) | 66.91 | 23.05(21.68-23.95) | 21.75(19.8-23.55) | -0.23(from -0.35 to -0.12) |
| New Zealand | both | 1141.28(1081.52-1191.36) | 1647.52(1481.5-1779.92) | 44.36 | 29.52(27.87-30.79) | 20.26(18.34-21.79) | -1.46(from -1.57 to -1.36) |
| Nicaragua | both | 91.25(76.37-106.07) | 430.27(362.14-501.95) | 371.53 | 6.25(5.12-7.49) | 10.86(9.23-12.5) | 2.06(from 1.81 to 2.31) |
| Niger | both | 134.36(102.49-176.23) | 373.72(275.61-509.87) | 178.16 | 5.44(4.17-7.06) | 5.62(4.24-7.51) | 0.18(from 0.09 to 0.28) |
| Nigeria | both | 2486.03(1797.95-3302.28) | 6381.69(4883.75-8137.66) | 156.7 | 6.39(4.67-8.32) | 8.63(6.75-10.78) | 1.44(from 1.26 to 1.63) |
| Niue | both | 0.29(0.24-0.35) | 0.29(0.23-0.36) | -0.24 | 12.79(10.66-15.3) | 13.61(10.77-17.01) | 0.19(from 0.15 to 0.22) |
| North Macedonia | both | 269.71(246.28-290.1) | 682.87(544.78-849.81) | 153.19 | 15.05(13.77-16.19) | 22.13(17.8-27.27) | 1.48(from 1.21 to 1.75) |
| Northern Mariana Islands | both | 3.03(2.36-3.79) | 8.1(6.83-9.38) | 167.51 | 19.68(15.87-23.99) | 18.34(15.88-20.86) | -0.23(from -0.36 to -0.1) |
| Norway | both | 1611.37(1518.52-1664.2) | 2034.99(1837.87-2176.11) | 26.29 | 22.69(21.47-23.4) | 19.84(18.04-21.11) | -0.46(from -0.59 to -0.32) |
| Oman | both | 44.74(30.74-61.68) | 133.3(107.78-167.42) | 197.95 | 7.73(5.36-10.43) | 10.2(8.48-12.04) | 1.4(from 1.19 to 1.62) |
| Pakistan | both | 2967.57(2546.46-3430.11) | 8604.81(6927.21-10775.92) | 189.96 | 5.43(4.66-6.3) | 8.34(6.72-10.41) | 1.41(from 1.17 to 1.64) |
| Palau | both | 1.18(0.91-1.54) | 2.39(1.86-2.97) | 102.17 | 13.78(10.71-17.67) | 13.69(10.87-16.66) | -0.06(from -0.12 to 0.01) |
| Palestine | both | 122.77(83.71-168.92) | 419.49(357.62-486.73) | 241.69 | 14.78(10.08-20.25) | 19.6(16.69-22.68) | 1.11(from 0.88 to 1.35) |
| Panama | both | 127.48(117.82-135.95) | 455.3(357.35-575.92) | 257.16 | 8.76(8.06-9.36) | 10.9(8.54-13.81) | 0.97(from 0.89 to 1.05) |
| Papua New Guinea | both | 105.89(71.02-141.59) | 318.44(229.07-424.81) | 200.73 | 6.31(4.24-8.41) | 7.46(5.48-9.64) | 0.5(from 0.46 to 0.54) |
| Paraguay | both | 134.65(119.68-150.9) | 652.16(506.67-823.81) | 384.33 | 6.34(5.61-7.12) | 12.16(9.47-15.31) | 2.57(from 2.36 to 2.78) |
| Peru | both | 895.63(768.61-1036.19) | 3034.71(2290.71-3930.99) | 238.83 | 7.85(6.73-9.07) | 9.44(7.12-12.25) | 0.8(from 0.58 to 1.02) |
| Philippines | both | 3761.98(3350.65-4195.46) | 11192.86(9309.42-13497.04) | 197.53 | 13.14(11.71-14.61) | 14.89(12.46-17.81) | 0.3(from 0.03 to 0.57) |
| Poland | both | 9180.43(8820.66-9403.78) | 17767.86(15128.74-20757.73) | 93.54 | 21.44(20.51-22) | 24.72(20.98-28.96) | 0.32(from 0.16 to 0.48) |
| Portugal | both | 2966.43(2838.58-3079.77) | 5189.14(4699.9-5585.54) | 74.93 | 22.17(21.13-23.03) | 20.11(18.52-21.52) | -0.45(from -0.62 to -0.28) |
| Puerto Rico | both | 487.41(458.6-511.76) | 1135.57(891.91-1428.68) | 132.98 | 13.69(12.84-14.39) | 15.44(12.15-19.55) | 0.31(from 0.09 to 0.53) |
| Qatar | both | 11.36(8.71-14.51) | 83.01(61.05-110.37) | 630.51 | 14.04(10.44-17.84) | 16.48(12.93-20.54) | 1.15(from 0.84 to 1.45) |
| Republic of Korea | both | 3203.84(3050.76-3377.21) | 12004.11(10649.1-13219.62) | 274.68 | 11.81(11.16-12.63) | 13.87(12.22-15.3) | 0.15(from -0.08 to 0.38) |
| Republic of Moldova | both | 797.9(766.41-833.52) | 1027.59(896.57-1163.98) | 28.79 | 18.1(17.38-18.9) | 17.66(15.45-20.01) | 0.72(from 0.16 to 1.28) |
| Romania | both | 3548.45(3417.68-3674.27) | 7577.04(6280.55-9022.07) | 113.53 | 12.86(12.39-13.31) | 20.18(16.61-24.11) | 1.35(from 1.16 to 1.55) |
| Russian Federation | both | 29696.31(28698.59-30770.67) | 42834.42(37637.48-48395.33) | 44.24 | 16.71(16.11-17.33) | 18.17(15.96-20.54) | 0.03(from -0.24 to 0.3) |
| Rwanda | both | 241.93(173.96-306.95) | 480.13(376.86-607.88) | 98.46 | 8.78(6.5-11.05) | 8.79(7.08-10.83) | -0.34(from -0.55 to -0.13) |
| Saint Kitts and Nevis | both | 6.93(6.31-7.53) | 10.79(9.11-12.5) | 55.65 | 18.91(17.37-20.42) | 18.32(15.84-21.11) | 0.06(from -0.09 to 0.22) |
| Saint Lucia | both | 10.01(9.25-10.75) | 25.17(21.37-29.46) | 151.56 | 12.12(11.23-12.99) | 12.08(10.24-14.11) | -0.39(from -0.67 to -0.11) |
| Saint Vincent and the Grenadines | both | 8.25(7.57-8.91) | 18.63(16.31-21.32) | 125.99 | 11.83(10.88-12.73) | 14.42(12.69-16.48) | 0.64(from 0.44 to 0.85) |
| Samoa | both | 8.54(7.12-10.34) | 13.84(11.13-17.06) | 62.15 | 10.39(8.79-12.45) | 10.06(8.18-12.34) | -0.18(from -0.22 to -0.13) |
| San Marino | both | 7.81(6.71-9.02) | 15.31(10.55-20.91) | 96.11 | 23.63(20.36-27.36) | 21.24(14.31-29.61) | -0.16(from -0.25 to -0.07) |
| Sao Tome and Principe | both | 5.75(4.66-6.79) | 14.01(10.1-18.85) | 143.52 | 9.79(8.12-11.41) | 15.18(11.24-20.55) | 1.58(from 1.52 to 1.63) |
| Saudi Arabia | both | 366.97(251.08-509.02) | 1628.86(1262.91-2044.65) | 343.87 | 6.76(4.56-9.32) | 9.66(7.79-11.64) | 1.13(from 0.89 to 1.37) |
| Senegal | both | 223.95(180.38-266.2) | 585.36(467.43-731.26) | 161.39 | 7.6(6.21-8.98) | 8.7(7.13-10.77) | 0.61(from 0.45 to 0.77) |
| Serbia | both | 2275.11(1842.73-2539.35) | 4018.3(3269.14-4942.52) | 76.62 | 21.09(16.95-23.71) | 25.38(20.63-31.01) | 0.83(from 0.67 to 0.98) |
| Seychelles | both | 9.27(8.35-10.21) | 25.82(22.67-29.32) | 178.57 | 16.5(14.85-18.14) | 25.33(22.17-28.67) | 1.12(from 0.88 to 1.37) |
| Sierra Leone | both | 111.2(88.4-134.43) | 224.85(171.96-289.82) | 102.2 | 6.17(4.98-7.42) | 6.96(5.44-8.86) | 0.64(from 0.49 to 0.79) |
| Singapore | both | 501.81(479.35-522.42) | 1110.78(990.84-1196.78) | 121.36 | 24.8(23.48-25.94) | 14.89(13.22-16.12) | -2.06(from -2.19 to -1.94) |
| Slovakia | both | 1410.54(1339.84-1478.71) | 2432.6(1932.43-3037.77) | 72.46 | 23.75(22.58-24.88) | 26.31(20.96-32.8) | 0.31(from 0.13 to 0.49) |
| Slovenia | both | 525.52(412.86-662.46) | 912.94(719.85-1163.3) | 73.72 | 21.69(17.07-27.36) | 19.84(15.58-25.45) | -0.5(from -0.79 to -0.21) |
| Solomon Islands | both | 11.49(7.16-16.59) | 31.42(20.25-41.62) | 173.49 | 8.48(5.85-11.85) | 10.43(7.38-13.29) | 0.6(from 0.5 to 0.7) |
| Somalia | both | 125.9(86.47-191.46) | 310.38(196.65-579.63) | 146.53 | 5.32(3.71-8.01) | 5.01(3.17-9.27) | 0(from -0.09 to 0.09) |
| South Africa | both | 2030.47(1721.43-2491.95) | 4601.09(4159.24-5197.54) | 126.6 | 10.39(8.75-12.96) | 11.21(10.13-12.6) | 0.27(from 0.03 to 0.51) |
| South Sudan | both | 227.72(137.29-371.46) | 346.32(222.75-527.6) | 52.08 | 10.28(6.28-16.58) | 9.99(6.57-14.78) | -0.03(from -0.11 to 0.05) |
| Spain | both | 10285.28(9692.52-10728.9) | 20011.12(17767.76-21745.72) | 94.56 | 18.95(17.84-19.77) | 18.85(17.05-20.21) | -0.01(from -0.06 to 0.05) |
| Sri Lanka | both | 477.59(432.78-525.08) | 1509.56(1129.08-1967.16) | 216.08 | 4.89(4.41-5.37) | 6.41(4.81-8.26) | 1.32(from 1.2 to 1.44) |
| Sudan | both | 447.08(340.38-664.05) | 1256.26(900.99-1850.6) | 180.99 | 5.02(3.85-7.52) | 7.1(5.26-10.59) | 1.31(from 1.21 to 1.41) |
| Suriname | both | 30.8(27.86-33.23) | 93.79(78.01-111.09) | 204.54 | 12.33(11.16-13.32) | 16.26(13.57-19.24) | 1.06(from 0.82 to 1.3) |
| Sweden | both | 2854.34(2672.2-2982.99) | 3623.37(3273.29-3862.99) | 26.94 | 18.2(17.12-18.95) | 15.96(14.67-16.96) | -0.54(from -0.68 to -0.4) |
| Switzerland | both | 1512.82(1424.49-1577.97) | 2234.27(1979.68-2431.3) | 47.69 | 14.06(13.29-14.64) | 11.85(10.7-12.84) | -0.85(from -1.03 to -0.67) |
| Syrian Arab Republic | both | 282.63(219.04-360.47) | 684.91(498.9-907.88) | 142.33 | 5.52(4.27-6.93) | 6.28(4.7-8.15) | 0.33(from 0.12 to 0.54) |
| Taiwan (Province of China) | both | 2342.66(2257.62-2417.92) | 10385.51(8282.33-13153.16) | 343.32 | 15.54(14.83-16.05) | 26.26(20.88-33.29) | 1.83(from 1.61 to 2.04) |
| Tajikistan | both | 260.45(239.83-283.89) | 428.24(346.72-525.52) | 64.42 | 8.87(8.17-9.66) | 10.22(8.41-12.35) | 1.13(from 0.68 to 1.58) |
| Thailand | both | 3572.09(3164.61-3995.51) | 10532.64(7839.17-13572.39) | 194.86 | 10.78(9.5-12.07) | 10.54(7.88-13.56) | -0.62(from -0.89 to -0.35) |
| Timor-Leste | both | 19.84(14.62-27.09) | 93.04(63.82-119.4) | 368.89 | 7.48(5.61-9.89) | 12.29(8.48-15.79) | 2.13(from 1.88 to 2.38) |
| Togo | both | 78.6(65.79-93.81) | 246.17(181.22-319.71) | 213.21 | 7.04(5.94-8.35) | 7.88(5.9-10.04) | 0.35(from 0.31 to 0.38) |
| Tokelau | both | 0.13(0.1-0.16) | 0.14(0.1-0.17) | 4.56 | 9.89(7.94-12.21) | 10.85(8.14-13.95) | 0.36(from 0.33 to 0.39) |
| Tonga | both | 3.02(2.48-3.53) | 5.36(4.18-6.75) | 77.51 | 6.04(4.97-7.1) | 6.91(5.4-8.68) | 0.37(from 0.24 to 0.5) |
| Trinidad and Tobago | both | 121.61(114.41-128.34) | 252.6(194.49-326.29) | 107.71 | 15.49(14.48-16.34) | 13.97(10.74-17.96) | -0.53(from -0.65 to -0.4) |
| Tunisia | both | 361.32(292.18-431.47) | 1154.43(843.43-1545.68) | 219.5 | 8.08(6.56-9.66) | 9.73(7.17-12.98) | 0.53(from 0.45 to 0.61) |
| Turkey | both | 4575.69(3636.35-5556.57) | 11194.28(9054.78-13548.54) | 144.65 | 13.24(10.44-16.04) | 13.11(10.62-15.83) | 0.26(from -0.21 to 0.72) |
| Turkmenistan | both | 145.91(138.93-153.59) | 253.88(206.6-313.54) | 73.99 | 7.37(7.01-7.76) | 7.08(5.81-8.71) | -0.38(from -0.81 to 0.05) |
| Tuvalu | both | 0.63(0.5-0.76) | 1.02(0.75-1.32) | 62.17 | 10.08(8.15-12.07) | 10.9(8.08-13.99) | 0.12(from 0.07 to 0.17) |
| Uganda | both | 404.33(330.22-474.23) | 1519.23(1193.83-1856.73) | 275.74 | 6.77(5.61-7.86) | 11.55(9.24-13.75) | 1.84(from 1.63 to 2.06) |
| Ukraine | both | 15302.81(14792.77-15835.54) | 14581.72(12548.23-16939.03) | -4.71 | 21.46(20.74-22.22) | 19.18(16.46-22.37) | -1.16(from -1.46 to -0.85) |
| United Arab Emirates | both | 55.98(37.11-76.77) | 449.34(306.44-608.29) | 702.73 | 18.55(11.88-24.75) | 17.4(11.94-24.35) | -0.31(from -0.73 to 0.12) |
| United Kingdom | both | 22538.26(21499.62-23104.42) | 24219.75(22210.04-25338.48) | 7.46 | 24.49(23.35-25.09) | 18.09(16.77-18.85) | -1.28(from -1.41 to -1.15) |
| United Republic of Tanzania | both | 790.12(655.08-965.28) | 2179.71(1732.3-2793.6) | 175.87 | 7.9(6.61-9.52) | 9.51(7.74-11.82) | 0.71(from 0.62 to 0.8) |
| United States of America | both | 65581.75(61887.68-67693.03) | 84026.43(77987.48-87516.13) | 28.12 | 20.05(18.98-20.66) | 14.77(13.86-15.32) | -1.29(from -1.39 to -1.18) |
| United States Virgin Islands | both | 15.16(12.88-17.35) | 47.53(39.86-55.43) | 213.64 | 19.78(16.9-22.59) | 26.57(22.3-31.01) | 1.32(from 1.11 to 1.53) |
| Uruguay | both | 1068.56(1008.24-1114.36) | 1519.61(1389.5-1629.56) | 42.21 | 27.53(25.97-28.72) | 26.12(24.14-27.82) | -0.27(from -0.35 to -0.19) |
| Uzbekistan | both | 817.94(776.29-856.83) | 1626.42(1380.78-1901.39) | 98.84 | 7.04(6.67-7.38) | 10.35(9.07-11.79) | 1.49(from 1.37 to 1.62) |
| Vanuatu | both | 4.59(3.33-6.06) | 14.69(11.02-19.18) | 220.23 | 7.69(5.71-9.84) | 9.29(7.09-11.92) | 0.5(from 0.36 to 0.63) |
| Venezuela (Bolivarian Republic of) | both | 800.19(761.16-839.85) | 3193.83(2439.5-4131.2) | 299.13 | 8.65(8.15-9.11) | 11.31(8.72-14.59) | 0.62(from 0.48 to 0.76) |
| Viet Nam | both | 3483.54(2819.38-4170.48) | 15556.68(12174.65-18984.66) | 346.58 | 8.98(7.27-10.68) | 17.5(13.92-21.05) | 2.64(from 2.51 to 2.77) |
| Yemen | both | 249.61(160.94-364.04) | 832.96(625.53-1119.02) | 233.71 | 5.48(3.53-7.97) | 6.66(5.01-9.07) | 1.01(from 0.88 to 1.14) |
| Zambia | both | 275.53(207.57-350.41) | 790.8(580.62-1018.08) | 187.01 | 10.42(8.01-13.09) | 12.62(9.51-15.96) | 0.6(from 0.57 to 0.64) |
| Zimbabwe | both | 362.25(316.9-413.48) | 817.52(623.03-1030.71) | 125.68 | 10(8.78-11.32) | 12.93(9.93-16.2) | 0.93(from 0.71 to 1.16) |
| Afghanistan | female | 274(153.02-464.44) | 592.07(349.9-859.85) | 116.09 | 8.19(4.92-13.23) | 8.92(5.91-12.11) | 0.5(from 0.27 to 0.72) |
| Albania | female | 76.43(69.09-83.63) | 183.48(137.93-236.79) | 140.07 | 7.14(6.44-7.84) | 8.07(6.08-10.42) | 0.78(from 0.58 to 0.97) |
| Algeria | female | 368.27(294.85-451.6) | 1151.65(881.06-1475.14) | 212.72 | 7.22(5.89-8.77) | 8.11(6.31-10.2) | 0.56(from 0.5 to 0.62) |
| American Samoa | female | 1.35(1.06-1.63) | 3.17(2.57-3.92) | 135.62 | 14.1(10.89-17.24) | 14.02(11.35-17.31) | 0.05(from -0.12 to 0.22) |
| Andorra | female | 3.19(2.36-4.55) | 9.11(6.63-12.12) | 185.2 | 13.58(10.16-18.86) | 11.54(8.29-15.56) | -0.55(from -0.71 to -0.39) |
| Angola | female | 117.74(73.17-190.24) | 437.53(329.18-575.97) | 271.61 | 6.59(4.05-10.18) | 8.1(6.3-10.38) | 0.81(from 0.69 to 0.94) |
| Antigua and Barbuda | female | 3.77(3.31-4.23) | 9.2(7.88-10.7) | 144.07 | 11.24(9.87-12.62) | 18.14(15.53-21.08) | 1.4(from 1.25 to 1.55) |
| Argentina | female | 3071.88(2879.52-3238.05) | 6011.11(5426.29-6572.53) | 95.68 | 17.34(16.19-18.29) | 18.76(17.01-20.4) | 0.14(from -0.01 to 0.29) |
| Armenia | female | 200.51(186.55-216.89) | 320.4(267.98-375.85) | 59.79 | 13.16(12.26-14.22) | 13.39(11.22-15.68) | 0.09(from 0 to 0.19) |
| Australia | female | 2147.43(1998.97-2246.68) | 3141.21(2717.64-3493.35) | 46.28 | 19.71(18.4-20.6) | 13(11.4-14.32) | -1.77(from -1.92 to -1.62) |
| Austria | female | 1700.42(1593.82-1785.15) | 1158.84(996.74-1286.33) | -31.85 | 21.69(20.43-22.7) | 10.09(8.94-11.05) | -2.98(from -3.1 to -2.86) |
| Azerbaijan | female | 261.76(238.41-288.94) | 491.88(373.24-634.28) | 87.91 | 8.9(8.1-9.84) | 10.51(7.74-13.6) | 1.24(from 0.78 to 1.71) |
| Bahamas | female | 12.03(10.87-13.3) | 30.45(24.56-37.49) | 153.19 | 14.3(12.92-15.82) | 15(12.05-18.3) | 0.42(from 0.28 to 0.57) |
| Bahrain | female | 7.49(6.18-8.91) | 30.01(23.44-37.86) | 300.91 | 10.35(8.65-12.31) | 9.92(7.78-12.31) | -0.1(from -0.41 to 0.2) |
| Bangladesh | female | 836.8(563.14-1154.87) | 2790(1789.16-4154.02) | 233.41 | 4.19(2.77-6) | 4.78(3.05-7.19) | 0.42(from 0.3 to 0.53) |
| Barbados | female | 29.19(26.26-31.95) | 62.63(50.81-74.68) | 114.53 | 16.2(14.75-17.64) | 22.61(18.35-26.96) | 1.52(from 1.26 to 1.77) |
| Belarus | female | 1257.21(1186.5-1329.91) | 1390.48(1119.95-1736.98) | 10.6 | 15.3(14.48-16.17) | 13.4(10.74-16.88) | -1.25(from -1.57 to -0.93) |
| Belgium | female | 2166.79(1961.56-2308.47) | 2098.67(1802.52-2344.04) | -3.14 | 22.29(20.37-23.66) | 13.77(12.2-15.06) | -1.82(from -1.97 to -1.68) |
| Belize | female | 3.52(3.13-3.91) | 12.11(10.27-13.98) | 243.84 | 7.58(6.73-8.42) | 9.34(7.89-10.84) | 0.87(from 0.51 to 1.22) |
| Benin | female | 50.66(41.13-61.01) | 158.2(125.64-202.16) | 212.29 | 5.24(4.22-6.31) | 6.77(5.45-8.43) | 1.06(from 1 to 1.12) |
| Bermuda | female | 8.3(7.42-9.21) | 12.1(9.57-15.27) | 45.78 | 23.91(21.36-26.45) | 14.75(11.83-18.65) | -2.03(from -2.19 to -1.86) |
| Bhutan | female | 5.5(3.13-8.48) | 18(11.49-25.6) | 227.1 | 4.78(2.65-7.14) | 7.16(4.65-10.15) | 1.3(from 1.25 to 1.36) |
| Bolivia (Plurinational State of) | female | 151.37(104.11-201.2) | 558.5(372.05-757.89) | 268.96 | 9.55(6.77-12.56) | 13.11(8.82-17.8) | 1.03(from 0.98 to 1.07) |
| Bosnia and Herzegovina | female | 282.12(260.37-304.56) | 562.92(444.09-702.36) | 99.53 | 13.23(12.21-14.31) | 16.78(13.25-21.04) | 1(from 0.82 to 1.19) |
| Botswana | female | 25.69(18.53-35.44) | 91.41(62.5-131.09) | 255.87 | 9.31(6.79-12.59) | 13.51(9.7-18.98) | 1.32(from 1.19 to 1.46) |
| Brazil | female | 4399.28(4165.79-4575.92) | 13645.62(12369.4-14593.93) | 210.18 | 10.07(9.4-10.52) | 10.52(9.54-11.25) | 0.22(from 0.06 to 0.38) |
| Brunei Darussalam | female | 10.55(8.8-12.7) | 31.49(26.91-36.42) | 198.64 | 23.82(19.83-28.13) | 23.96(20.6-27.56) | 0.45(from 0.31 to 0.59) |
| Bulgaria | female | 1055.88(986.25-1127.68) | 1589.56(1292.39-1958.7) | 50.54 | 16.11(15.04-17.17) | 18.72(15.07-23.26) | 1.65(from 1.18 to 2.12) |
| Burkina Faso | female | 100.56(74.65-131.6) | 287.85(219.73-369.51) | 186.23 | 5.02(3.72-6.54) | 6.56(5.08-8.4) | 1(from 0.88 to 1.13) |
| Burundi | female | 83.99(56.34-120.33) | 130.89(92.05-180.23) | 55.85 | 6.8(4.65-9.64) | 6.37(4.48-8.75) | -0.39(from -0.46 to -0.31) |
| Cabo Verde | female | 6.21(5.33-7.2) | 25.08(19.92-30.77) | 304.13 | 4.52(3.89-5.19) | 9.87(7.9-11.99) | 2.52(from 2.31 to 2.73) |
| Cambodia | female | 200.53(148.47-261.12) | 771.28(590.98-950.26) | 284.62 | 8.11(6.27-10.28) | 11.94(9.37-14.55) | 1.35(from 1.3 to 1.39) |
| Cameroon | female | 154.68(121.81-191.76) | 478.88(354.83-643.47) | 209.58 | 7.68(6.01-9.52) | 8.88(6.69-11.81) | 0.69(from 0.61 to 0.76) |
| Canada | female | 3112.53(2873.29-3273.57) | 5515.73(4745.71-6129.73) | 77.21 | 16.75(15.53-17.58) | 13.65(12.05-14.99) | -0.69(from -0.76 to -0.62) |
| Central African Republic | female | 34.41(24.18-47.88) | 56.04(38.66-76.86) | 62.85 | 5.98(4.32-8.07) | 5.22(3.66-7.22) | -0.35(from -0.42 to -0.29) |
| Chad | female | 63.44(44.98-84.24) | 158.45(120.7-212.09) | 149.78 | 4.66(3.32-6.14) | 6.89(5.29-9.04) | 1.62(from 1.52 to 1.71) |
| Chile | female | 621.68(582.63-655.33) | 1846.49(1652.93-2028.34) | 197.02 | 12.33(11.49-13.03) | 13.58(12.19-14.87) | 0.49(from 0.42 to 0.56) |
| China | female | 37298.67(31305.33-43321.14) | 97046.9(78376.73-117167.09) | 160.19 | 9.14(7.73-10.58) | 9.68(7.82-11.68) | 0.32(from 0.12 to 0.51) |
| Colombia | female | 878.04(825.32-925.95) | 2820.9(2200.78-3560.6) | 221.27 | 10.45(9.71-11.07) | 9.56(7.48-12.11) | -0.4(from -0.47 to -0.34) |
| Comoros | female | 7.8(4.6-11.37) | 20.79(14.79-27.36) | 166.63 | 7.17(4.54-10.29) | 8.2(5.89-10.66) | 0.36(from 0.27 to 0.46) |
| Congo | female | 52.8(32.86-77.55) | 126.27(86.71-181.12) | 139.16 | 9.8(6.38-13.87) | 10.28(7.37-14.06) | 0.25(from 0.12 to 0.37) |
| Cook Islands | female | 0.47(0.36-0.59) | 0.9(0.71-1.12) | 90.05 | 8.47(6.5-10.52) | 7.21(5.69-8.96) | -0.61(from -0.86 to -0.36) |
| Costa Rica | female | 86.3(78.67-92.93) | 386.1(301.58-486.82) | 347.38 | 9.84(8.91-10.61) | 13.72(10.67-17.27) | 1.23(from 1.1 to 1.37) |
| Croatia | female | 682.42(630.47-739.83) | 946.53(741.91-1172.26) | 38.7 | 18.4(16.96-19.95) | 17.31(13.58-21.52) | 0.21(from -0.01 to 0.43) |
| Cuba | female | 853.12(792.62-898.15) | 1950.94(1603.28-2346.33) | 128.68 | 16.56(15.39-17.45) | 18.36(15.09-22.18) | 0.36(from 0.28 to 0.44) |
| Cyprus | female | 46.75(38.77-57.16) | 118.88(101.53-137.18) | 154.26 | 12.49(10.31-15.37) | 11.9(10.18-13.63) | 0.12(from -0.05 to 0.3) |
| Czechia | female | 2089.02(1982.09-2183.64) | 1955.35(1580.07-2369.59) | -6.4 | 24.93(23.72-26.01) | 15.41(12.46-18.54) | -1.85(from -2.01 to -1.69) |
| C么te d'Ivoire | female | 102.82(78.58-133.65) | 340.76(263.85-433.49) | 231.42 | 6.63(5.18-8.6) | 7.93(6.4-9.9) | 0.72(from 0.65 to 0.79) |
| Democratic People's Republic of Korea | female | 888.5(641.96-1202.45) | 1678.44(1200.58-2200.62) | 88.91 | 9.51(7.09-12.6) | 8.94(6.41-11.82) | -0.13(from -0.19 to -0.07) |
| Democratic Republic of the Congo | female | 434.29(332.21-572.04) | 984.89(632.35-1553.26) | 126.78 | 5.93(4.53-8.02) | 5.53(3.49-8.95) | -0.34(from -0.64 to -0.05) |
| Denmark | female | 1091.29(1020.45-1146.66) | 1280.85(1113.71-1419.23) | 17.37 | 22.14(20.93-23.15) | 18.76(16.53-20.61) | -0.91(from -1.13 to -0.7) |
| Djibouti | female | 5.19(3.58-7.58) | 24.75(17.69-34.19) | 376.71 | 8.37(5.93-11.93) | 10.03(7.75-13.32) | 0.67(from 0.6 to 0.73) |
| Dominica | female | 5.04(4.37-5.79) | 6.73(5.53-8.17) | 33.63 | 11.26(9.77-12.93) | 13.72(11.33-16.64) | 1.01(from 0.89 to 1.13) |
| Dominican Republic | female | 136.91(118.86-156.52) | 521.69(391.08-690.33) | 281.05 | 8.13(7.03-9.23) | 11.16(8.39-14.65) | 1.71(from 1.44 to 1.98) |
| Ecuador | female | 212.27(196.5-227.79) | 870.37(701.4-1076.31) | 310.02 | 8.66(7.95-9.36) | 11.68(9.45-14.29) | 1.63(from 1.3 to 1.95) |
| Egypt | female | 768.15(696.08-841.34) | 1991.65(1379.65-2845.41) | 159.28 | 5.64(5.1-6.18) | 7.99(5.49-11.29) | 1.37(from 1.29 to 1.45) |
| El Salvador | female | 77.53(69.6-85.3) | 304.28(231.75-393.23) | 292.46 | 4.94(4.43-5.45) | 8.52(6.46-11.04) | 1.8(from 1.52 to 2.07) |
| Equatorial Guinea | female | 5.27(3.12-8.16) | 30.2(18.6-47.39) | 473.63 | 5.16(3.04-7.72) | 12.25(7.79-18.45) | 3.91(from 3.49 to 4.33) |
| Eritrea | female | 30.65(15.84-49.15) | 130.04(92.7-179.42) | 324.29 | 5.65(3.03-8.96) | 9.27(6.72-12.61) | 1.54(from 1.26 to 1.82) |
| Estonia | female | 225.93(211.62-240.05) | 297.13(236.18-367.38) | 31.51 | 16.82(15.78-17.83) | 15.68(12.45-19.56) | -0.24(from -0.42 to -0.05) |
| Eswatini | female | 12.64(9.64-16.37) | 31.75(20.53-45.51) | 151.25 | 8.49(6.51-10.91) | 10.59(7.04-14.72) | 0.93(from 0.61 to 1.25) |
| Ethiopia | female | 606.71(347.59-894.4) | 1270.1(901.81-1871.91) | 109.34 | 6.46(3.82-9.24) | 6.59(4.73-9.68) | -0.13(from -0.31 to 0.05) |
| Fiji | female | 13.85(10.94-17.18) | 35.18(27.65-44.2) | 154.03 | 8.63(6.81-10.54) | 10.25(8.16-12.69) | 0.83(from 0.61 to 1.04) |
| Finland | female | 592.55(550.72-624.6) | 790.85(681.46-881.28) | 33.47 | 12.83(11.95-13.47) | 10.27(9.17-11.32) | -0.85(from -0.92 to -0.78) |
| France | female | 9930.78(8973.69-10601.98) | 12347.68(10236.74-14243.87) | 24.34 | 18.32(16.76-19.4) | 12.78(11.01-14.28) | -1.41(from -1.48 to -1.33) |
| Gabon | female | 33.58(21.19-53.5) | 58.07(42.68-75.76) | 72.91 | 11.54(7.44-18.14) | 11.25(8.43-14.49) | -0.22(from -0.36 to -0.08) |
| Gambia | female | 6.86(5.19-8.64) | 28.97(20.01-40.75) | 322.49 | 4.51(3.47-5.64) | 6.22(4.33-8.76) | 0.99(from 0.84 to 1.13) |
| Georgia | female | 339.25(308.13-372.42) | 364.04(305.23-432.62) | 7.31 | 9.25(8.42-10.12) | 10.03(8.36-11.9) | 1.34(from 0.8 to 1.87) |
| Germany | female | 18125.89(16724.42-19156.06) | 18069.77(15744.5-19817.97) | -0.31 | 21.38(19.92-22.47) | 14.51(12.98-15.74) | -1.8(from -2.46 to -1.15) |
| Ghana | female | 174.04(138.15-221.28) | 577.66(459.8-708.64) | 231.92 | 6.02(4.85-7.52) | 7.27(5.87-8.87) | 0.5(from 0.45 to 0.55) |
| Greece | female | 1103.67(1027.85-1173.4) | 1867.81(1626.99-2070.46) | 69.24 | 13.3(12.34-14.11) | 12.2(10.91-13.3) | -0.91(from -1.19 to -0.64) |
| Greenland | female | 4.78(4.05-5.63) | 8.85(7.25-10.76) | 85.28 | 30.1(25.61-35.06) | 29.34(24.02-35.93) | -0.89(from -1.36 to -0.41) |
| Grenada | female | 5.68(5.02-6.43) | 9.75(8.6-10.98) | 71.59 | 12.49(11.09-14.01) | 17.17(15.09-19.3) | 1.25(from 0.92 to 1.58) |
| Guam | female | 3.57(2.89-4.35) | 9.48(7.79-11.32) | 165.05 | 12.14(9.33-15.17) | 9.53(7.89-11.36) | -1.02(from -1.37 to -0.66) |
| Guatemala | female | 89.01(76.82-101.96) | 507.65(405.16-629.06) | 470.33 | 5.7(4.98-6.41) | 8.75(7.03-10.78) | 1.25(from 0.97 to 1.53) |
| Guinea | female | 82.42(64.47-100.82) | 156.37(110.03-206.03) | 89.72 | 5.41(4.19-6.6) | 6.14(4.34-8.07) | 0.44(from 0.41 to 0.47) |
| Guinea-Bissau | female | 11.78(8.15-16.21) | 27.13(20.44-35.54) | 130.22 | 6.12(4.3-8.24) | 7.7(5.92-9.94) | 0.89(from 0.84 to 0.93) |
| Guyana | female | 21.69(18.4-25.06) | 41.1(32.1-51.32) | 89.52 | 11.8(10.1-13.54) | 13.34(10.5-16.41) | 0.39(from 0.21 to 0.57) |
| Haiti | female | 164.59(100.65-216.38) | 375.36(242.32-529.37) | 128.05 | 10.4(6.47-13.54) | 11.14(7.37-15.59) | 0.4(from 0.32 to 0.48) |
| Honduras | female | 54.19(44.83-64.36) | 243.74(175.99-355.57) | 349.79 | 5.23(4.22-6.39) | 8.3(6.17-11.89) | 1.61(from 1.39 to 1.83) |
| Hungary | female | 2155.37(2042.76-2273.6) | 2512.29(2077.4-3001.47) | 16.56 | 24.76(23.43-26.05) | 20.47(16.95-24.51) | -0.91(from -1.1 to -0.72) |
| Iceland | female | 21.56(19.27-23.63) | 28.39(23.17-32.75) | 31.63 | 13.18(11.88-14.42) | 8.45(7.1-9.69) | -1.86(from -2.1 to -1.62) |
| India | female | 10745.11(8563.65-13329.78) | 41483.34(32822.32-50946.96) | 286.07 | 5.47(4.3-6.84) | 7.58(6.02-9.26) | 0.89(from 0.71 to 1.08) |
| Indonesia | female | 4390.29(3028.93-5591.54) | 14103.62(8592.58-19566.6) | 221.25 | 9.02(6.37-11.27) | 13.85(8.59-18.89) | 1.43(from 1.3 to 1.56) |
| Iran (Islamic Republic of) | female | 740.46(602.68-932.88) | 2869.9(2593.14-3130.66) | 287.58 | 6.65(5.29-8.37) | 8.42(7.55-9.22) | 1.01(from 0.89 to 1.14) |
| Iraq | female | 255.53(179.26-361.67) | 819.39(627.99-1036.31) | 220.67 | 6.56(4.61-9.24) | 7.25(5.69-8.95) | 0.68(from 0.45 to 0.91) |
| Ireland | female | 473.21(444.67-499.5) | 584.94(506.98-662.34) | 23.61 | 20.81(19.55-21.96) | 13.92(12.17-15.7) | -1.52(from -1.6 to -1.44) |
| Israel | female | 509.47(474.32-540.59) | 986.59(855.34-1095.41) | 93.65 | 20.1(18.57-21.32) | 14.34(12.62-15.81) | -2(from -2.32 to -1.67) |
| Italy | female | 8591.74(8127.63-8854.55) | 11594.37(9846.25-12554.33) | 34.95 | 16.28(15.41-16.77) | 12.41(10.9-13.26) | -1.13(from -1.21 to -1.04) |
| Jamaica | female | 102.93(93.18-111.94) | 239.7(190.68-297.48) | 132.87 | 10.3(9.39-11.16) | 14.64(11.58-18.27) | 1.09(from 0.82 to 1.35) |
| Japan | female | 14242.09(13197.01-14774.24) | 30661.36(23452.45-34756.48) | 115.29 | 15.08(13.93-15.66) | 12.14(10.11-13.27) | -0.84(from -0.9 to -0.79) |
| Jordan | female | 78.93(61.72-101.1) | 326.12(252.54-412.91) | 313.17 | 12.49(9.61-16.01) | 11.96(9.34-14.95) | -0.05(from -0.17 to 0.07) |
| Kazakhstan | female | 1010.94(946.23-1083.57) | 1126.46(972.83-1290.12) | 11.43 | 13.06(12.23-13.97) | 11.42(9.92-13.03) | -0.32(from -0.47 to -0.17) |
| Kenya | female | 218.39(141.54-296.75) | 868.12(621.71-1227.26) | 297.5 | 5.52(3.61-7.54) | 8.06(5.89-11.18) | 1.72(from 1.51 to 1.94) |
| Kiribati | female | 1.44(1.11-1.81) | 2.65(1.92-3.51) | 84.26 | 7.75(5.95-9.8) | 8.08(6.08-10.57) | -0.04(from -0.11 to 0.03) |
| Kuwait | female | 18.99(16-21.77) | 72.6(56.09-91.06) | 282.24 | 8.72(7.23-10.07) | 7.86(6.03-9.87) | 0.66(from 0.06 to 1.26) |
| Kyrgyzstan | female | 187.11(172.37-205.12) | 185.84(161.03-214.24) | -0.68 | 10.27(9.46-11.27) | 7.71(6.65-8.87) | -0.92(from -1.12 to -0.72) |
| Lao People's Democratic Republic | female | 102.41(63.76-152.52) | 254.75(175.99-360.58) | 148.77 | 9.63(6.26-14.1) | 11.99(8.46-16.56) | 0.56(from 0.48 to 0.64) |
| Latvia | female | 366.72(346.47-389.06) | 414.64(325.15-527.26) | 13.07 | 15.73(14.86-16.7) | 14.78(11.46-19.08) | -0.24(from -0.45 to -0.04) |
| Lebanon | female | 140.92(111.47-183.34) | 452.6(347.37-636.66) | 221.17 | 13.29(10.58-17.1) | 15.85(12.18-22.22) | 0.92(from 0.76 to 1.07) |
| Lesotho | female | 28.42(20.98-40.83) | 65.37(42.58-91.65) | 129.98 | 5.46(4-7.97) | 9.87(6.6-13.63) | 2.72(from 2.46 to 2.99) |
| Liberia | female | 27.67(22.75-33.5) | 55.96(36.17-80.4) | 102.23 | 5.92(4.86-7.11) | 6.37(4.11-9.13) | 0.81(from 0.48 to 1.14) |
| Libya | female | 110.82(76.54-163.68) | 319.31(221.18-421.5) | 188.12 | 12.81(8.81-18.8) | 12.72(8.69-16.66) | 0.28(from 0.07 to 0.48) |
| Lithuania | female | 398.02(375.05-423.12) | 529.24(436.29-630.52) | 32.97 | 14.27(13.46-15.16) | 13.34(10.97-16.06) | -0.27(from -0.44 to -0.1) |
| Luxembourg | female | 76.75(70.05-82.92) | 81.36(68.07-94.16) | 6 | 22.8(20.9-24.44) | 13.08(11.02-15.01) | -2.1(from -2.25 to -1.94) |
| Madagascar | female | 154.85(113.07-198.02) | 362.11(258.34-506.08) | 133.84 | 6.29(4.69-7.85) | 6.79(5.01-9.36) | 0.16(from 0.09 to 0.24) |
| Malawi | female | 79.69(64.13-96.25) | 190.08(141.62-243.93) | 138.52 | 4.36(3.51-5.24) | 5.13(3.86-6.56) | 0.76(from 0.67 to 0.85) |
| Malaysia | female | 683.8(580.01-797.43) | 2165.74(1692.88-2723.84) | 216.72 | 15.96(13.2-19.13) | 18.54(14.46-23.12) | 0.07(from -0.12 to 0.25) |
| Maldives | female | 3.55(2.27-4.99) | 11.56(9.31-14.02) | 225.98 | 11.68(8.47-15.66) | 9.71(7.81-11.8) | -1.15(from -1.35 to -0.94) |
| Mali | female | 99.14(80.2-118.11) | 232.46(173.96-302.47) | 134.49 | 5.14(4.13-6.12) | 6.11(4.64-7.7) | 0.5(from 0.45 to 0.56) |
| Malta | female | 34.18(31.11-37.49) | 59.02(49.03-68.94) | 72.69 | 14.4(13.08-15.76) | 10.77(9.06-12.51) | -1.07(from -1.21 to -0.94) |
| Marshall Islands | female | 0.78(0.62-0.99) | 1.75(1.22-2.41) | 124.69 | 10.11(7.96-12.8) | 12.19(8.69-16.33) | 0.58(from 0.51 to 0.65) |
| Mauritania | female | 37.78(27.58-48.09) | 78.57(59.77-101.49) | 107.95 | 7.67(5.66-9.72) | 8.57(6.64-10.88) | 0.57(from 0.47 to 0.66) |
| Mauritius | female | 28.56(26.14-31.25) | 99.28(81.21-119.78) | 247.64 | 7.53(6.87-8.23) | 10.63(8.71-12.82) | 1.25(from 1.1 to 1.4) |
| Mexico | female | 1369.27(1303.33-1413.7) | 4916.77(4100.53-5913.83) | 259.08 | 6.81(6.39-7.07) | 8.09(6.7-9.66) | 0.71(from 0.63 to 0.8) |
| Micronesia (Federated States of) | female | 2.33(1.71-3.08) | 3.91(2.69-5.33) | 68.25 | 10.84(8.07-14.01) | 12.27(8.77-16.36) | 0.38(from 0.34 to 0.41) |
| Monaco | female | 8.45(6.46-10.54) | 11.04(8.44-13.51) | 30.73 | 18.16(13.83-22.59) | 18.35(14.03-22.69) | 0.14(from 0.08 to 0.21) |
| Mongolia | female | 43.4(35.02-53.44) | 88.79(68.49-114.32) | 104.56 | 7.76(6.31-9.5) | 7.8(6.12-9.89) | -0.33(from -0.47 to -0.19) |
| Montenegro | female | 36.92(30.23-43.58) | 68.78(55.93-82.41) | 86.27 | 10.79(8.84-12.7) | 12.59(10.29-15.01) | 0.89(from 0.77 to 1.01) |
| Morocco | female | 423.51(334-515.24) | 1234.08(939.48-1595.14) | 191.39 | 6.4(5.03-7.86) | 8.17(6.31-10.37) | 0.95(from 0.89 to 1.01) |
| Mozambique | female | 135.22(102.96-171.3) | 397.9(284.78-544.94) | 194.26 | 4.91(3.81-6.05) | 7.37(5.3-10.06) | 1.73(from 1.56 to 1.91) |
| Myanmar | female | 1014.16(759.83-1307.3) | 2717.68(1976.93-3645.16) | 167.97 | 8.47(6.58-10.81) | 11.07(8.19-14.64) | 1.01(from 0.89 to 1.13) |
| Namibia | female | 19.42(14.67-24.94) | 57.66(42.45-76.62) | 196.95 | 5.32(4.05-6.78) | 7.61(5.65-9.99) | 1.39(from 1.31 to 1.47) |
| Nauru | female | 0.26(0.15-0.41) | 0.27(0.16-0.39) | 2.24 | 16.98(10.27-26) | 14.84(9.42-20.81) | -0.55(from -0.88 to -0.22) |
| Nepal | female | 166.14(104.76-239.23) | 579.72(400.19-794.85) | 248.93 | 3.85(2.31-5.51) | 5.5(3.79-7.62) | 1.25(from 1.06 to 1.43) |
| Netherlands | female | 2427.59(2224.77-2569.82) | 3752.75(3247.84-4163.41) | 54.59 | 19.86(18.34-20.95) | 18.43(16.25-20.33) | -0.29(from -0.39 to -0.19) |
| New Zealand | female | 585.73(543.66-620.55) | 790.14(680.8-873.33) | 34.9 | 26.75(24.85-28.3) | 17.64(15.46-19.45) | -1.48(from -1.57 to -1.38) |
| Nicaragua | female | 48.1(37.91-59.95) | 224.07(190.79-258.21) | 365.87 | 5.99(4.57-7.72) | 10.25(8.78-11.72) | 1.94(from 1.58 to 2.29) |
| Niger | female | 55.61(38.61-76.54) | 186.31(134.14-255.74) | 235.03 | 4.72(3.24-6.48) | 5.53(4.08-7.5) | 0.56(from 0.5 to 0.61) |
| Nigeria | female | 1260.14(868.69-1800.34) | 3363.97(2391.42-4483.6) | 166.95 | 6.41(4.44-9.04) | 8.85(6.52-11.45) | 1.56(from 1.35 to 1.77) |
| Niue | female | 0.16(0.13-0.21) | 0.14(0.11-0.19) | -12.09 | 11.75(9.35-14.75) | 11.96(8.86-15.98) | 0.04(from -0.05 to 0.12) |
| North Macedonia | female | 120.33(105.66-132.84) | 289.44(230.22-361.44) | 140.53 | 12.87(11.3-14.2) | 17.78(14.26-22.12) | 1.35(from 1.14 to 1.56) |
| Northern Mariana Islands | female | 1.11(0.81-1.48) | 2.44(1.99-3.01) | 120.46 | 18.08(13.52-24.01) | 11.71(9.61-14.35) | -1.71(from -1.85 to -1.56) |
| Norway | female | 812.9(746.16-851.65) | 1022.29(884.85-1113.87) | 25.76 | 19.42(18.1-20.24) | 17.63(15.69-19.16) | -0.34(from -0.49 to -0.19) |
| Oman | female | 22.14(14.33-30.94) | 60.88(46.23-76.99) | 174.99 | 8.3(5.41-11.42) | 10.58(8.36-12.99) | 1.23(from 1.03 to 1.43) |
| Pakistan | female | 1180.74(948.29-1427.42) | 3636.9(2785.7-4842.54) | 208.02 | 4.79(3.8-5.8) | 7.24(5.55-9.52) | 1.34(from 1.13 to 1.56) |
| Palau | female | 0.87(0.64-1.17) | 1.71(1.3-2.15) | 96.18 | 19.51(14.56-25.74) | 19.08(14.66-23.52) | -0.11(from -0.16 to -0.07) |
| Palestine | female | 62.79(42.99-85.6) | 200.51(166.31-238.52) | 219.35 | 13.52(9.29-18.36) | 17.32(14.39-20.65) | 1.05(from 0.8 to 1.3) |
| Panama | female | 62.83(56.64-68.52) | 224.16(176.15-282.63) | 256.79 | 8.63(7.75-9.42) | 10.16(7.96-12.82) | 0.76(from 0.66 to 0.87) |
| Papua New Guinea | female | 48.45(30.17-67.63) | 142.19(99.15-193.19) | 193.49 | 6.01(3.7-8.35) | 7.13(4.95-9.45) | 0.52(from 0.48 to 0.57) |
| Paraguay | female | 72.71(62.9-83.82) | 307.67(236.21-388.97) | 323.16 | 6.4(5.51-7.41) | 10.72(8.25-13.54) | 2.16(from 1.96 to 2.35) |
| Peru | female | 463.27(398.93-534.4) | 1634.78(1238.58-2098.17) | 252.88 | 7.96(6.82-9.19) | 9.68(7.32-12.46) | 0.62(from 0.38 to 0.87) |
| Philippines | female | 1717.51(1488.35-1966.16) | 4807.63(3722.2-6121.66) | 179.92 | 12.27(10.75-13.88) | 12.22(9.6-15.31) | -0.12(from -0.43 to 0.18) |
| Poland | female | 4745.21(4485.1-4917.85) | 8039.31(6443.29-9847.86) | 69.42 | 18.3(17.27-18.95) | 18.28(14.63-22.52) | -0.26(from -0.42 to -0.11) |
| Portugal | female | 1471.5(1372.63-1552.58) | 2244.84(1937-2482.59) | 52.55 | 18.77(17.52-19.77) | 14.49(12.87-15.77) | -1.04(from -1.18 to -0.9) |
| Puerto Rico | female | 227.76(209.73-244.24) | 533.92(416.22-666.96) | 134.42 | 11.81(10.83-12.68) | 12.39(9.69-15.57) | -0.03(from -0.22 to 0.17) |
| Qatar | female | 5.87(4.32-7.56) | 32.28(24.41-41.82) | 449.62 | 18.62(12.91-24.46) | 25.85(21.05-31.36) | 1.89(from 1.52 to 2.27) |
| Republic of Korea | female | 1568.67(1473.4-1677.22) | 5335.2(4512.29-6066.37) | 240.11 | 9.84(9.16-10.57) | 10.5(8.94-11.91) | -0.36(from -0.55 to -0.17) |
| Republic of Moldova | female | 400.83(376.56-426.45) | 443.91(383.93-506.59) | 10.75 | 15.36(14.47-16.31) | 12.76(11.04-14.54) | 0.15(from -0.39 to 0.69) |
| Romania | female | 1639.37(1559.1-1723.62) | 3127.08(2583.76-3751.19) | 90.75 | 10.76(10.23-11.27) | 14.19(11.72-17.18) | 0.74(from 0.58 to 0.89) |
| Russian Federation | female | 17544.75(16897.83-18482.69) | 23567.29(19759.95-27651.9) | 34.33 | 14.8(14.24-15.61) | 15.46(12.88-18.23) | -0.12(from -0.35 to 0.12) |
| Rwanda | female | 117.48(71.35-164.48) | 253.27(193.68-317.75) | 115.58 | 7.63(4.77-10.66) | 7.95(6.2-9.78) | -0.02(from -0.21 to 0.17) |
| Saint Kitts and Nevis | female | 3.63(3.22-4.04) | 4.37(3.62-5.24) | 20.49 | 17.3(15.51-19.23) | 14.36(11.99-17.17) | -0.01(from -0.21 to 0.19) |
| Saint Lucia | female | 5.45(4.97-6.01) | 11.94(9.95-14.14) | 118.84 | 11.45(10.43-12.52) | 10.4(8.68-12.33) | -0.84(from -1.16 to -0.51) |
| Saint Vincent and the Grenadines | female | 4.73(4.29-5.18) | 8.69(7.43-10.09) | 83.78 | 11.86(10.84-12.97) | 13.53(11.57-15.7) | 0.51(from 0.22 to 0.79) |
| Samoa | female | 4.56(3.67-5.85) | 7.88(5.97-10.04) | 72.84 | 10.59(8.6-13.49) | 10.99(8.44-13.91) | 0.08(from 0.04 to 0.13) |
| San Marino | female | 3.57(2.95-4.25) | 6.76(4.69-9.59) | 89.33 | 18.83(15.58-22.31) | 16.43(11.31-24.05) | -0.15(from -0.31 to 0.02) |
| Sao Tome and Principe | female | 1.73(1.41-2.07) | 3.92(2.73-5.42) | 126.68 | 5.59(4.6-6.62) | 7.99(5.61-11.07) | 1.18(from 1.11 to 1.25) |
| Saudi Arabia | female | 168.35(111.61-242.1) | 686.76(515.66-879.68) | 307.93 | 7.27(4.79-10.48) | 9.87(7.68-12.3) | 0.92(from 0.67 to 1.17) |
| Senegal | female | 88.8(67.95-109.69) | 271.57(212.2-347.92) | 205.81 | 6.14(4.78-7.5) | 7.81(6.18-9.88) | 1.03(from 0.87 to 1.19) |
| Serbia | female | 1027.65(806.62-1197.68) | 1628.33(1308.97-2003.16) | 58.45 | 17.88(13.82-21.1) | 18.77(15.1-23.21) | 0.22(from 0.06 to 0.38) |
| Seychelles | female | 4.84(4.22-5.5) | 12.08(10.1-14.26) | 149.68 | 14.71(12.9-16.74) | 21.73(18.2-25.59) | 1.19(from 1 to 1.39) |
| Sierra Leone | female | 42.44(32.36-53.29) | 108.33(82.59-141.42) | 155.23 | 4.92(3.81-6.16) | 6.67(5.09-8.61) | 1.36(from 1.24 to 1.48) |
| Singapore | female | 235.84(221.68-250.22) | 522.58(450.84-575.11) | 121.58 | 21.16(19.72-22.54) | 12.92(11.16-14.22) | -1.96(from -2.1 to -1.82) |
| Slovakia | female | 605.98(564.07-652.95) | 1032.45(812.98-1283.1) | 70.38 | 17.5(16.3-18.82) | 18.73(14.66-23.33) | 0.15(from -0.01 to 0.31) |
| Slovenia | female | 270.24(209.84-340.19) | 387.92(299.25-490.88) | 43.55 | 17.97(14-22.78) | 13.89(10.75-17.71) | -1.08(from -1.35 to -0.81) |
| Solomon Islands | female | 4.83(2.61-8.08) | 14.27(8.37-20.57) | 195.39 | 8.04(4.64-13.25) | 9.92(6.34-13.53) | 0.6(from 0.47 to 0.74) |
| Somalia | female | 56.42(35.76-80.93) | 155.69(93.62-284.67) | 175.97 | 4.43(2.83-6.36) | 4.45(2.66-8.05) | 0.32(from 0.19 to 0.44) |
| South Africa | female | 1063.45(870.74-1310.84) | 2261.62(1966.56-2594.1) | 112.67 | 9.38(7.6-11.71) | 9.31(8.1-10.64) | 0(from -0.2 to 0.2) |
| South Sudan | female | 93.83(49.89-169.96) | 151.38(90.43-241.57) | 61.34 | 9.25(4.99-16.69) | 9.02(5.55-13.99) | 0.01(from -0.09 to 0.11) |
| Spain | female | 4992.04(4546.52-5289.07) | 8713.65(7294.85-9796.18) | 74.55 | 15.65(14.33-16.51) | 13.62(11.89-14.97) | -0.58(from -0.65 to -0.5) |
| Sri Lanka | female | 226.36(198.06-257.39) | 813.43(610.33-1056.92) | 259.35 | 4.7(4.09-5.34) | 6.13(4.58-7.91) | 1.22(from 1.11 to 1.32) |
| Sudan | female | 213.32(161.49-277.92) | 548.92(399.14-755.18) | 157.32 | 4.95(3.78-6.52) | 6.57(4.83-8.89) | 1.12(from 1.04 to 1.2) |
| Suriname | female | 15.13(13.39-16.78) | 43.38(35.62-52.13) | 186.77 | 11.35(9.98-12.63) | 13.69(11.23-16.46) | 0.73(from 0.53 to 0.93) |
| Sweden | female | 1464.04(1333.41-1555.66) | 1772.69(1534.2-1943.91) | 21.08 | 16.06(14.81-16.92) | 14.1(12.61-15.31) | -0.49(from -0.61 to -0.37) |
| Switzerland | female | 711.41(647.26-754.83) | 1014.73(850-1137.47) | 42.64 | 10.84(9.99-11.44) | 9.36(8.1-10.36) | -0.71(from -0.9 to -0.53) |
| Syrian Arab Republic | female | 135.36(101.28-173.66) | 314.9(220.88-426.44) | 132.63 | 5.68(4.22-7.27) | 6.38(4.59-8.36) | 0.31(from 0.07 to 0.54) |
| Taiwan (Province of China) | female | 933.72(885.71-977.75) | 4205.42(3319.2-5354.91) | 350.39 | 13.13(12.35-13.79) | 19.59(15.46-24.94) | 1.26(from 1.06 to 1.47) |
| Tajikistan | female | 121.15(108.72-135.36) | 188.86(151.11-235.55) | 55.88 | 7.6(6.81-8.54) | 8.96(7.16-10.99) | 1.2(from 0.78 to 1.63) |
| Thailand | female | 1632.24(1406.52-1872.61) | 4793.51(3588.73-6148.99) | 193.68 | 9.24(7.93-10.63) | 8.64(6.46-11.08) | -0.65(from -0.91 to -0.39) |
| Timor-Leste | female | 11.06(7.82-16.21) | 45.38(30.45-59.99) | 310.19 | 8.36(6.11-11.81) | 11.97(8-15.66) | 1.56(from 1.34 to 1.78) |
| Togo | female | 35.79(29.31-43.35) | 121.46(85.26-164.97) | 239.38 | 6.11(4.97-7.33) | 6.84(4.89-9.13) | 0.44(from 0.34 to 0.53) |
| Tokelau | female | 0.08(0.06-0.11) | 0.08(0.05-0.11) | -4.59 | 11.32(8.71-14.79) | 12.2(8.68-16.76) | 0.26(from 0.2 to 0.32) |
| Tonga | female | 1.77(1.42-2.13) | 3.17(2.45-4.14) | 79.19 | 6.75(5.44-8.12) | 7.27(5.6-9.49) | 0.18(from 0.08 to 0.29) |
| Trinidad and Tobago | female | 63.05(58.23-68.08) | 116.1(90.33-148.89) | 84.13 | 14.93(13.72-16.09) | 12.03(9.36-15.4) | -0.97(from -1.13 to -0.81) |
| Tunisia | female | 187.51(147.29-230.47) | 587.67(431.78-789.26) | 213.4 | 8.56(6.72-10.55) | 9.46(6.95-12.63) | 0.29(from 0.22 to 0.36) |
| Turkey | female | 2144.3(1652.68-2700.33) | 4989.65(3991.23-6113.61) | 132.69 | 11.85(9.06-14.88) | 10.9(8.72-13.35) | -0.1(from -0.58 to 0.38) |
| Turkmenistan | female | 72.18(67.2-77.44) | 126.88(102.09-157.89) | 75.79 | 6.45(6-6.92) | 6.33(5.14-7.85) | -0.45(from -0.83 to -0.08) |
| Tuvalu | female | 0.35(0.27-0.44) | 0.53(0.38-0.71) | 50.8 | 9.84(7.72-12.35) | 10.65(7.72-14.17) | 0.13(from 0.07 to 0.19) |
| Uganda | female | 161.19(121.18-199.3) | 702.65(544.32-857.85) | 335.92 | 5.26(4.07-6.39) | 9.53(7.52-11.62) | 2.15(from 1.87 to 2.43) |
| Ukraine | female | 8491.41(8071.64-8963.06) | 6875.53(5480.8-8432.45) | -19.03 | 18.41(17.53-19.4) | 14.44(11.45-17.85) | -1.53(from -1.8 to -1.27) |
| United Arab Emirates | female | 22.39(14.36-30.91) | 133.89(84.29-190.08) | 498.04 | 17.98(11.06-25.45) | 14.91(8.18-24.5) | -0.4(from -1.06 to 0.26) |
| United Kingdom | female | 11668.75(10942.83-12061.21) | 11441.68(10212.24-12144.45) | -1.95 | 20.79(19.63-21.42) | 15.02(13.7-15.83) | -1.31(from -1.47 to -1.15) |
| United Republic of Tanzania | female | 367.02(292.66-443.62) | 1070.09(862.77-1306.19) | 191.56 | 7.08(5.69-8.57) | 8.78(7.22-10.57) | 0.9(from 0.74 to 1.05) |
| United States of America | female | 33573.84(31048.84-35035.64) | 40200.88(36240.49-42449.77) | 19.74 | 17.05(15.99-17.73) | 12.43(11.43-13.04) | -1.29(from -1.38 to -1.2) |
| United States Virgin Islands | female | 7.98(6.72-9.34) | 20.44(16.65-24.46) | 156.28 | 19.22(16.11-22.53) | 20.24(16.42-24.25) | 0.18(from 0.07 to 0.3) |
| Uruguay | female | 566.19(523.92-599.42) | 803.88(707.04-885.7) | 41.98 | 24.97(23.15-26.39) | 22.27(19.98-24.26) | -0.51(from -0.58 to -0.43) |
| Uzbekistan | female | 419.61(389.47-447.95) | 806.03(684.94-953.49) | 92.09 | 6.36(5.91-6.78) | 9.76(8.5-11.2) | 1.74(from 1.59 to 1.89) |
| Vanuatu | female | 1.88(1.29-2.58) | 6.43(4.56-8.47) | 241.2 | 7.23(5.06-9.8) | 8.68(6.24-11.45) | 0.41(from 0.24 to 0.59) |
| Venezuela (Bolivarian Republic of) | female | 435.81(406.62-462.11) | 1604.17(1203.81-2108.97) | 268.09 | 8.89(8.2-9.45) | 10.54(7.92-13.91) | 0.35(from 0.18 to 0.52) |
| Viet Nam | female | 1609.82(1289.4-1960.74) | 6080.93(4577.27-7579.2) | 277.74 | 7.05(5.65-8.54) | 11.91(9.08-14.76) | 2.13(from 2 to 2.25) |
| Yemen | female | 130.66(85.1-194.9) | 417.86(309.01-563.21) | 219.82 | 5.42(3.46-8) | 6.48(4.83-8.9) | 0.94(from 0.81 to 1.07) |
| Zambia | female | 124.9(79.62-176.12) | 354.59(252.71-484.84) | 183.91 | 9.59(6.32-13.29) | 10.72(7.74-14.36) | 0.41(from 0.26 to 0.56) |
| Zimbabwe | female | 180.52(152.35-215.59) | 469.97(342.95-628.07) | 160.35 | 9.55(8.06-11.36) | 12.88(9.47-17.14) | 1.73(from 1.37 to 2.09) |
| Afghanistan | male | 264.72(151.22-493.17) | 453.83(313.44-796.08) | 71.44 | 7.47(4.45-13.63) | 7.99(5.76-13.7) | 0.46(from 0.26 to 0.66) |
| Albania | male | 93.49(84.65-102.29) | 201.71(147.57-269.51) | 115.76 | 10.65(9.62-11.66) | 10.41(7.72-13.77) | 0.31(from -0.07 to 0.7) |
| Algeria | male | 375.77(292.49-470.5) | 1232.1(929.73-1577.15) | 227.88 | 7.29(5.77-9.02) | 8.07(6.18-10.23) | 0.38(from 0.33 to 0.42) |
| American Samoa | male | 1.89(1.47-2.26) | 4.02(3.36-4.73) | 113.29 | 18.54(14.7-22.05) | 19.42(16.4-22.79) | 0.27(from 0.17 to 0.37) |
| Andorra | male | 10.95(8.54-14.52) | 24.54(19.42-30.13) | 124.1 | 45.08(35.65-58.42) | 35.55(28.15-43.58) | -0.82(from -0.87 to -0.78) |
| Angola | male | 166.98(111.6-249.03) | 514.7(380.85-661.53) | 208.25 | 9.54(6.32-13.86) | 11.69(8.79-14.8) | 0.8(from 0.59 to 1.01) |
| Antigua and Barbuda | male | 2.88(2.6-3.18) | 5.86(4.92-6.9) | 103.55 | 12.84(11.58-14.1) | 13.72(11.58-16.14) | 0.39(from 0.04 to 0.73) |
| Argentina | male | 3521.31(3353.3-3680.99) | 6875.24(6352.1-7423.86) | 95.25 | 26.16(24.89-27.35) | 29.99(27.66-32.41) | 0.39(from 0.25 to 0.53) |
| Armenia | male | 170.99(160.66-181.72) | 264.72(222.13-311.14) | 54.82 | 15.22(14.31-16.21) | 15.55(13-18.29) | 0.03(from -0.17 to 0.23) |
| Australia | male | 2350.03(2254.35-2431.14) | 3593.12(3259.19-3919.54) | 52.9 | 28.21(26.95-29.22) | 18.3(16.68-19.91) | -1.88(from -2.07 to -1.7) |
| Austria | male | 1576.03(1503.31-1638.51) | 1444.35(1316.55-1567.84) | -8.36 | 36.05(34.4-37.47) | 17.99(16.47-19.49) | -2.86(from -3.01 to -2.72) |
| Azerbaijan | male | 278.82(251.27-306.98) | 570.7(438.71-754.56) | 104.69 | 12.93(11.65-14.19) | 14.29(11.03-18.61) | 0.86(from 0.32 to 1.4) |
| Bahamas | male | 13.44(12.05-15.01) | 37.24(29.96-45.58) | 177.02 | 21.24(19.09-23.64) | 22.71(18.5-27.33) | 0.49(from 0.36 to 0.61) |
| Bahrain | male | 11.54(9.31-13.94) | 53.87(40.18-70.93) | 366.87 | 14.82(11.98-17.74) | 12.91(10.11-16.35) | -0.73(from -1.06 to -0.4) |
| Bangladesh | male | 1209.71(846.43-1730.25) | 3233.03(2245.25-4864.63) | 167.26 | 4.96(3.47-7.1) | 5.06(3.55-7.59) | -0.05(from -0.25 to 0.15) |
| Barbados | male | 23.08(20.75-25.43) | 55.4(46.16-66.15) | 140.02 | 19.05(17.22-20.84) | 25.48(21.22-30.36) | 0.55(from 0.29 to 0.82) |
| Belarus | male | 988.85(946.82-1036.07) | 1343.54(1073.36-1708.04) | 35.87 | 21.59(20.56-22.61) | 23.82(19.09-30.04) | -0.38(from -0.65 to -0.11) |
| Belgium | male | 1831.08(1742.86-1918.15) | 2226.16(2006.82-2436.72) | 21.58 | 30.79(29.13-32.23) | 21.3(19.33-23.22) | -1.41(from -1.49 to -1.32) |
| Belize | male | 2.86(2.52-3.22) | 15.42(13.24-17.94) | 439.08 | 6.36(5.58-7.16) | 11.45(9.82-13.39) | 1.6(from 1.02 to 2.19) |
| Benin | male | 71.02(58.55-86.95) | 172.71(130.87-231) | 143.17 | 7.77(6.42-9.51) | 8.63(6.65-11.31) | 0.42(from 0.37 to 0.47) |
| Bermuda | male | 7.84(7.07-8.63) | 13.43(11.18-15.97) | 71.24 | 31.41(28.27-34.64) | 23.83(19.99-28.33) | -0.51(from -0.73 to -0.29) |
| Bhutan | male | 4.64(2.4-7.57) | 17.92(10.19-26.4) | 286.39 | 4.39(2.37-7.02) | 6.79(3.99-9.93) | 1.64(from 1.58 to 1.71) |
| Bolivia (Plurinational State of) | male | 109.28(73.47-142.21) | 433.85(280.17-592.09) | 297 | 7.98(5.37-10.25) | 11.28(7.25-15.24) | 1.16(from 1.09 to 1.24) |
| Bosnia and Herzegovina | male | 261.56(243.52-282.74) | 755.91(599.05-950.86) | 189 | 15.98(14.83-17.3) | 29.66(23.57-36.86) | 2.67(from 2.27 to 3.07) |
| Botswana | male | 27.88(20.83-36.43) | 97.34(70.28-124.38) | 249.15 | 12.34(9.45-15.83) | 18.76(13.92-23.41) | 0.91(from 0.44 to 1.39) |
| Brazil | male | 3940.81(3779.15-4086.7) | 13406.22(12520.51-14212.02) | 240.19 | 10.32(9.79-10.72) | 13.09(12.14-13.88) | 0.95(from 0.8 to 1.1) |
| Brunei Darussalam | male | 14.69(11.53-18.07) | 40.97(33.86-48.94) | 179 | 41.05(31.3-50.9) | 43.04(35.53-51.35) | 1.1(from 0.61 to 1.58) |
| Bulgaria | male | 1310.58(1220.05-1410.86) | 2082.04(1662.05-2566.34) | 58.86 | 23.46(21.88-25.12) | 33.97(27.31-41.71) | 2.66(from 2.16 to 3.16) |
| Burkina Faso | male | 127.39(100.02-166.33) | 296.92(226.14-403.04) | 133.09 | 6.79(5.42-8.84) | 8.09(6.33-10.93) | 0.61(from 0.43 to 0.79) |
| Burundi | male | 96.25(77.47-119.21) | 172.1(116.87-270.11) | 78.81 | 9.52(7.7-11.7) | 7.97(5.56-12.1) | -0.77(from -0.87 to -0.67) |
| Cabo Verde | male | 4.37(3.76-5.02) | 22.21(15.51-26.91) | 408.74 | 4.42(3.81-5.07) | 13.26(8.91-16.23) | 2.67(from 2.1 to 3.25) |
| Cambodia | male | 189.12(142.06-298.56) | 790.18(615.82-963.4) | 317.82 | 10.3(7.86-16.02) | 17.09(13.35-20.35) | 1.88(from 1.81 to 1.95) |
| Cameroon | male | 209.43(157.51-266.02) | 635.4(448.1-889.16) | 203.4 | 10.8(8.21-13.64) | 12.53(9.1-16.95) | 0.51(from 0.44 to 0.57) |
| Canada | male | 3202.32(3073.08-3322.94) | 6100.46(5547.8-6667.11) | 90.5 | 23.49(22.43-24.41) | 19.23(17.51-20.97) | -0.74(from -0.8 to -0.69) |
| Central African Republic | male | 46.47(32.96-66.77) | 72.4(49.53-115.03) | 55.8 | 9.17(7.06-12.73) | 7.86(5.67-12.08) | -0.46(from -0.52 to -0.4) |
| Chad | male | 78.27(57.24-102.07) | 210.95(155.26-281.82) | 169.51 | 6.01(4.38-7.86) | 7.71(5.69-10.18) | 0.91(from 0.83 to 0.99) |
| Chile | male | 545.21(513.19-577.44) | 1677.14(1527.82-1825.88) | 207.61 | 13.08(12.28-13.84) | 16.01(14.54-17.45) | 0.99(from 0.86 to 1.11) |
| China | male | 42023.49(34898.76-49395.9) | 164729.7(132244.47-202320.13) | 291.99 | 11.73(9.95-13.59) | 19.32(15.8-23.15) | 2.21(from 1.93 to 2.49) |
| Colombia | male | 666.02(627.51-699.02) | 2316.97(1774.66-3013.53) | 247.88 | 8.29(7.72-8.75) | 9.69(7.4-12.59) | 0.52(from 0.34 to 0.7) |
| Comoros | male | 8.55(5.01-11.55) | 18.6(13.1-25.87) | 117.6 | 8.65(5.5-11.44) | 9.07(6.55-12.4) | 0.01(from -0.12 to 0.15) |
| Congo | male | 62.77(42.15-84.65) | 139.61(101.48-188.17) | 122.41 | 14.36(10.45-18.9) | 12.77(9.53-16.6) | -0.6(from -0.86 to -0.35) |
| Cook Islands | male | 0.49(0.41-0.58) | 0.96(0.81-1.15) | 94.01 | 8.24(6.84-9.59) | 8.35(7.04-9.98) | -0.1(from -0.26 to 0.07) |
| Costa Rica | male | 77.61(71.86-83) | 401.46(311.35-508.62) | 417.25 | 9.48(8.72-10.15) | 17.29(13.44-21.85) | 2.24(from 2.09 to 2.39) |
| Croatia | male | 704.12(648.63-757.82) | 1361.94(1089.03-1692.46) | 93.43 | 29.69(27.45-31.89) | 36.86(29.55-45.66) | 1.05(from 0.83 to 1.26) |
| Cuba | male | 717.98(679.86-755.83) | 1529.62(1255.12-1884.02) | 113.05 | 14.39(13.6-15.17) | 17.13(14.02-21.1) | 0.49(from 0.27 to 0.72) |
| Cyprus | male | 49.2(41.48-57.65) | 146.41(123.67-172.94) | 197.6 | 14.28(11.97-16.76) | 17.12(14.34-20.51) | 0.97(from 0.62 to 1.32) |
| Czechia | male | 2555.14(2456.17-2656.81) | 2722.27(2238.38-3307.59) | 6.54 | 47.55(45.57-49.46) | 29.86(24.72-36.18) | -1.71(from -1.93 to -1.49) |
| C么te d'Ivoire | male | 204.67(153.3-268.49) | 509.36(383.14-648.96) | 148.87 | 10.87(8.26-14.25) | 10.76(8.29-13.36) | -0.41(from -0.57 to -0.26) |
| Democratic People's Republic of Korea | male | 753.55(558.75-1034.95) | 1763.58(1269.57-2495.26) | 134.04 | 12.61(9.74-16.51) | 13.83(10.17-18.96) | 0.45(from 0.38 to 0.52) |
| Democratic Republic of the Congo | male | 513.01(372.69-842.55) | 1010.3(632.43-1964.25) | 96.94 | 7.88(5.75-14.03) | 7.22(4.54-14.23) | -0.51(from -0.82 to -0.2) |
| Denmark | male | 954.68(915.63-995.43) | 1365.99(1247.41-1496.44) | 43.08 | 27.76(26.58-28.9) | 25.37(23.14-27.85) | -0.77(from -1.02 to -0.52) |
| Djibouti | male | 6.05(3.78-8.75) | 34.71(23.79-49.2) | 473.78 | 9.72(6.31-13.79) | 12.28(8.82-16.67) | 0.81(from 0.76 to 0.87) |
| Dominica | male | 3.87(3.35-4.46) | 6.84(5.51-8.48) | 76.61 | 13.24(11.48-15.1) | 16.16(13.06-19.95) | 0.76(from 0.71 to 0.8) |
| Dominican Republic | male | 121.88(104.51-140.46) | 592.98(401.5-797.05) | 386.53 | 6.93(5.9-8.05) | 13.66(9.36-18.08) | 3.07(from 2.87 to 3.26) |
| Ecuador | male | 154.06(143.05-165.14) | 732.5(573.69-928.41) | 375.45 | 6.16(5.68-6.63) | 10.89(8.57-13.76) | 2.59(from 2.27 to 2.91) |
| Egypt | male | 783.82(689.48-878.39) | 2565.63(1803.16-3578.76) | 227.32 | 5.24(4.52-5.85) | 7.33(5.23-10.08) | 1.09(from 0.98 to 1.2) |
| El Salvador | male | 63.81(58.3-69.69) | 247.59(186.86-322.13) | 288.03 | 4.64(4.21-5.11) | 9.72(7.32-12.69) | 2.33(from 1.94 to 2.72) |
| Equatorial Guinea | male | 6.76(4.56-10.23) | 30.58(16.69-43.87) | 352.19 | 8.35(5.5-12.32) | 17.18(9.71-23.96) | 3.17(from 2.98 to 3.37) |
| Eritrea | male | 31.6(21.25-42.31) | 117.42(82.4-153.14) | 271.6 | 7.97(5.2-10.27) | 11.02(7.75-14.06) | 0.78(from 0.47 to 1.08) |
| Estonia | male | 170.13(161.17-179.85) | 230.84(183.03-292.67) | 35.69 | 24.61(23.31-25.94) | 24.02(19.09-30.35) | 0.05(from -0.2 to 0.31) |
| Eswatini | male | 13.97(10.04-19.21) | 37.81(23.62-53.67) | 170.71 | 12.54(9.01-17.06) | 18.03(11.53-25.18) | 1.3(from 0.92 to 1.68) |
| Ethiopia | male | 798.65(534.79-1580.82) | 1584.81(1088.01-2446.06) | 98.44 | 8.12(5.34-15.67) | 8.03(5.51-12.34) | -0.06(from -0.36 to 0.25) |
| Fiji | male | 16.09(12.96-19.71) | 39.35(30.57-49.68) | 144.6 | 10.31(8.42-12.55) | 14(11.41-17.14) | 1.14(from 0.98 to 1.31) |
| Finland | male | 457.58(436.26-475.6) | 824.86(748.02-909.49) | 80.27 | 17.6(16.71-18.35) | 14.94(13.61-16.44) | -0.63(from -0.69 to -0.57) |
| France | male | 10330.49(9822.93-10797.24) | 13149.04(11767.16-14510.05) | 27.28 | 31.45(29.97-32.91) | 21.17(19.11-23.27) | -1.55(from -1.62 to -1.48) |
| Gabon | male | 41.37(26.15-64.86) | 83.17(56.3-106.01) | 101.02 | 18.15(11.68-27.81) | 19.43(13.43-24.02) | 0.11(from 0.04 to 0.18) |
| Gambia | male | 8.1(6.12-10.61) | 29.39(20.13-40.95) | 262.89 | 4.83(3.8-6.15) | 6.89(4.79-9.5) | 1.04(from 0.89 to 1.2) |
| Georgia | male | 333.8(299.7-370.52) | 418.19(347-495.7) | 25.28 | 13.91(12.56-15.35) | 17.59(14.67-20.84) | 1.89(from 1.32 to 2.47) |
| Germany | male | 13654.16(13081.26-14190.34) | 19481.76(17778.35-21221.38) | 42.68 | 29.52(28.16-30.7) | 22.28(20.45-24.12) | -1.32(from -1.88 to -0.77) |
| Ghana | male | 179.47(139.25-223.86) | 695.1(485.51-923.53) | 287.3 | 6.53(5.14-7.97) | 10.66(7.55-13.96) | 1.92(from 1.83 to 2) |
| Greece | male | 1028.57(968.36-1087.55) | 2132.3(1930.59-2316.34) | 107.31 | 15.26(14.37-16.14) | 18.12(16.6-19.57) | 0.18(from -0.01 to 0.37) |
| Greenland | male | 4.5(3.92-5.21) | 10.95(8.87-13.11) | 143.47 | 29.6(26.26-33.65) | 33.16(27.39-38.74) | 0.42(from 0.26 to 0.58) |
| Grenada | male | 5.07(4.49-5.69) | 10.21(9.11-11.45) | 101.56 | 16.51(14.66-18.49) | 21.47(19.19-23.88) | 1.02(from 0.54 to 1.49) |
| Guam | male | 7.11(5.91-8.52) | 17.04(14.14-20.54) | 139.52 | 22.35(17.85-27.02) | 19.61(16.42-23.47) | -0.28(from -0.75 to 0.2) |
| Guatemala | male | 78.91(66.05-93.4) | 457.4(361.03-577.63) | 479.66 | 4.63(3.92-5.44) | 9.51(7.58-11.86) | 2.49(from 2.11 to 2.87) |
| Guinea | male | 94.01(76.81-112.95) | 213.5(158.59-290.28) | 127.1 | 6.07(4.98-7.25) | 8.29(6.19-11.12) | 1.22(from 1.13 to 1.31) |
| Guinea-Bissau | male | 20.74(13.46-27.51) | 31.5(21.86-42.15) | 51.86 | 11.12(7.59-14.52) | 10.68(7.72-14.1) | -0.15(from -0.19 to -0.11) |
| Guyana | male | 23.87(20.23-27.92) | 44.29(34.38-56.76) | 85.57 | 13.7(11.71-15.92) | 16.13(12.76-20.34) | 0.48(from 0.32 to 0.63) |
| Haiti | male | 136.9(91.35-191.22) | 295.84(192.61-420.53) | 116.09 | 9.58(6.64-13.12) | 9.85(6.55-13.97) | 0.3(from 0.16 to 0.44) |
| Honduras | male | 41.07(28.17-52.88) | 186.38(103.14-278.95) | 353.76 | 4.13(2.75-5.3) | 6.94(3.8-10.27) | 2.07(from 1.86 to 2.28) |
| Hungary | male | 2265.76(2165.2-2371.59) | 3133.73(2567.46-3724.3) | 38.31 | 39.91(38.13-41.75) | 40.87(33.6-48.42) | -0.04(from -0.22 to 0.15) |
| Iceland | male | 21.51(19.58-23.68) | 41.4(36.43-46.75) | 92.46 | 16.63(15.17-18.27) | 15.58(13.71-17.51) | -0.28(from -0.47 to -0.09) |
| India | male | 11225.95(9579.25-14024.45) | 37614.65(29868.39-46220.91) | 235.07 | 5.48(4.61-6.84) | 7.42(5.92-9.05) | 0.93(from 0.81 to 1.04) |
| Indonesia | male | 3876.94(3091.74-4598.21) | 16138.05(10711.06-21553.48) | 316.26 | 8.87(7.03-10.52) | 17.55(11.47-23.24) | 2.42(from 2.34 to 2.49) |
| Iran (Islamic Republic of) | male | 924.55(719.31-1126.58) | 3543.24(3232.92-3898.13) | 283.24 | 7.65(5.95-9.29) | 10.22(9.29-11.28) | 1.23(from 1.03 to 1.43) |
| Iraq | male | 285.65(184.25-408.19) | 977.9(748.01-1233.89) | 242.35 | 7.94(5.12-11.22) | 9.51(7.35-11.71) | 0.76(from 0.57 to 0.95) |
| Ireland | male | 562.28(535.21-590.1) | 792.09(716.98-865.62) | 40.87 | 32.18(30.54-33.81) | 22.88(20.59-25.09) | -1.35(from -1.41 to -1.28) |
| Israel | male | 526.54(490.48-555.98) | 1021.29(920.39-1110.87) | 93.96 | 24.37(22.64-25.71) | 19.27(17.41-20.94) | -1.62(from -1.94 to -1.3) |
| Italy | male | 8767.89(8508.37-8942.79) | 13282.92(12205.08-14019.37) | 51.5 | 24.15(23.26-24.71) | 20.28(18.71-21.34) | -0.75(from -0.9 to -0.6) |
| Jamaica | male | 90.41(82.4-98.07) | 261.03(205.12-323.33) | 188.71 | 10.97(10-11.89) | 18.46(14.51-22.89) | 2.13(from 1.71 to 2.55) |
| Japan | male | 16365.46(15796.25-16659.7) | 33080.67(29574.01-35088.71) | 102.14 | 23.8(22.76-24.31) | 20.27(18.46-21.39) | -0.69(from -0.76 to -0.62) |
| Jordan | male | 75.03(57.87-95.62) | 427.81(327.85-543.97) | 470.21 | 12.43(9.64-15.73) | 14.12(10.95-17.83) | 0.68(from 0.48 to 0.88) |
| Kazakhstan | male | 870.06(819.91-923.79) | 1063.66(918.37-1233.49) | 22.25 | 19.17(18.01-20.31) | 17.22(14.97-19.76) | -0.1(from -0.26 to 0.07) |
| Kenya | male | 173.68(103.96-236.79) | 759.8(587.08-969.82) | 337.48 | 4.72(2.84-6.41) | 8.22(6.53-10.16) | 2.21(from 1.98 to 2.44) |
| Kiribati | male | 2.4(1.89-2.98) | 3.99(2.93-5.53) | 66.01 | 14.83(11.98-17.84) | 14.55(11.02-19.63) | -0.21(from -0.27 to -0.16) |
| Kuwait | male | 21.11(18.4-23.57) | 150.63(119.05-185.96) | 613.63 | 6.36(5.5-7.29) | 11.66(9.16-14.36) | 2.73(from 2.27 to 3.18) |
| Kyrgyzstan | male | 155.47(144.91-166.9) | 159.94(138.57-184.73) | 2.87 | 13.03(12.1-14.04) | 8.82(7.68-10.11) | -1.59(from -1.86 to -1.31) |
| Lao People's Democratic Republic | male | 103.49(68.91-160.75) | 290.61(201.56-383.74) | 180.81 | 10.95(7.42-17.01) | 14.81(10.29-19.28) | 0.94(from 0.89 to 0.98) |
| Latvia | male | 276.36(263.31-290.38) | 330.93(262.88-413.96) | 19.74 | 22.53(21.45-23.65) | 23.15(18.31-28.94) | 0.13(from -0.21 to 0.47) |
| Lebanon | male | 133.67(96.1-174.61) | 457.77(358.45-588.67) | 242.47 | 13.62(9.96-17.56) | 19.64(15.31-25.3) | 2(from 1.74 to 2.26) |
| Lesotho | male | 29.42(21.88-44.19) | 67.06(48.45-92.02) | 127.93 | 7.89(5.93-11.76) | 14.17(10.43-19.04) | 2.18(from 2 to 2.36) |
| Liberia | male | 42.34(34.05-53.74) | 63.98(39.78-99.59) | 51.11 | 7.58(6.11-9.59) | 6.97(4.45-11.07) | 0.18(from -0.18 to 0.54) |
| Libya | male | 105.3(59.23-152.12) | 300.98(208.5-406.38) | 185.83 | 11.26(6.3-16.25) | 12.21(8.5-16.4) | 0.42(from 0.25 to 0.58) |
| Lithuania | male | 348.03(332.03-364.53) | 495.16(407.94-594.26) | 42.28 | 20.67(19.68-21.66) | 23.58(19.42-28.28) | 0.54(from 0.28 to 0.8) |
| Luxembourg | male | 70.16(64.99-75.51) | 88.15(76.36-101.16) | 25.64 | 33.58(31.19-36) | 19.56(16.94-22.43) | -1.99(from -2.21 to -1.77) |
| Madagascar | male | 177.72(139.37-217.8) | 352.27(238.24-498.51) | 98.21 | 7.31(5.76-8.93) | 7.49(5.24-10.47) | 0.06(from 0 to 0.13) |
| Malawi | male | 85.34(69-103.36) | 211.54(151.39-275.87) | 147.88 | 5.22(4.26-6.22) | 7.26(5.37-9.2) | 1.24(from 1.01 to 1.47) |
| Malaysia | male | 684.15(589.22-800.84) | 2672.04(2051.75-3350.37) | 290.56 | 16.65(14.28-19.72) | 22.09(17.09-27.49) | 0.23(from -0.04 to 0.51) |
| Maldives | male | 3.65(2.53-5.47) | 12(9.73-14.41) | 228.78 | 7.78(5.62-11.27) | 7.76(6.25-9.36) | -0.45(from -0.61 to -0.29) |
| Mali | male | 149.32(122.06-178.76) | 382.51(280.44-498.31) | 156.18 | 8.01(6.61-9.54) | 9.46(6.94-12.15) | 0.66(from 0.56 to 0.75) |
| Malta | male | 36.31(33.34-39.61) | 77.42(68.51-87.22) | 113.2 | 20.68(18.98-22.4) | 18.27(16.12-20.61) | -0.25(from -0.4 to -0.1) |
| Marshall Islands | male | 0.89(0.69-1.09) | 1.99(1.45-2.62) | 124.66 | 11.82(9.42-14.66) | 12.41(9.42-15.91) | 0.33(from 0.17 to 0.49) |
| Mauritania | male | 42.15(31.08-52.94) | 77.1(56.15-98.68) | 82.91 | 9.6(7.09-11.91) | 8.12(6.03-10.32) | -0.53(from -0.77 to -0.29) |
| Mauritius | male | 27.53(25.37-30) | 115.37(93.89-142.71) | 319.05 | 9.04(8.32-9.83) | 15.52(12.71-19.18) | 1.75(from 1.48 to 2.02) |
| Mexico | male | 1231.21(1188.48-1262.75) | 5601(4598.84-6802.28) | 354.92 | 6.26(5.98-6.45) | 10.55(8.69-12.73) | 1.88(from 1.77 to 1.99) |
| Micronesia (Federated States of) | male | 2.56(1.91-3.37) | 4.2(2.71-6.11) | 64.43 | 11.74(9.06-15.13) | 13.83(9.68-19.27) | 0.47(from 0.44 to 0.5) |
| Monaco | male | 8.64(7.05-10.3) | 14.33(11.8-17.02) | 65.85 | 28.97(23.72-34.4) | 31.36(25.79-37.34) | 0.39(from 0.27 to 0.52) |
| Mongolia | male | 45.47(35.72-56.21) | 104.16(80.51-137.35) | 129.06 | 10.1(7.94-12.23) | 11.49(9.09-14.54) | -0.09(from -0.26 to 0.08) |
| Montenegro | male | 48.76(40.02-57.89) | 99.28(78.1-123.35) | 103.62 | 18.93(15.63-22.54) | 23.29(18.32-28.7) | 1.03(from 0.9 to 1.16) |
| Morocco | male | 383.69(289.19-477.1) | 1247.56(841.11-1655.14) | 225.15 | 6.11(4.49-7.61) | 8.82(5.88-11.7) | 1.07(from 0.77 to 1.37) |
| Mozambique | male | 130.59(106.92-158.62) | 434.58(306.25-577.11) | 232.8 | 5.41(4.46-6.44) | 10.39(7.49-13.46) | 2.79(from 2.62 to 2.96) |
| Myanmar | male | 975.07(711.73-1654.21) | 2864.13(2012.64-3640.88) | 193.74 | 9.43(7.08-15.75) | 15.12(10.74-19.11) | 1.83(from 1.75 to 1.91) |
| Namibia | male | 19.06(14.26-24.04) | 55.13(44.35-69.56) | 189.31 | 6.24(4.74-7.76) | 10.07(8.25-12.33) | 1.79(from 1.65 to 1.93) |
| Nauru | male | 0.36(0.22-0.56) | 0.35(0.22-0.47) | -4.01 | 19.25(12.94-28.61) | 18.87(13.08-24.33) | -0.25(from -0.47 to -0.03) |
| Nepal | male | 147.23(93.25-243.3) | 504.71(358.48-819.2) | 242.81 | 3.4(2.17-5.47) | 5.27(3.77-8.53) | 1.59(from 1.35 to 1.84) |
| Netherlands | male | 2230.38(2132.29-2327.54) | 4021.63(3635.11-4400.83) | 80.31 | 28(26.67-29.25) | 25.76(23.27-28.03) | -0.33(from -0.46 to -0.19) |
| New Zealand | male | 555.55(526.41-584.83) | 857.37(777.42-934.89) | 54.33 | 33.02(31.17-34.74) | 23.26(21.13-25.33) | -1.5(from -1.62 to -1.38) |
| Nicaragua | male | 43.15(36.43-50.9) | 206.2(164.48-249.64) | 377.83 | 6.65(5.59-7.86) | 11.52(9.23-13.87) | 2.16(from 1.93 to 2.38) |
| Niger | male | 78.74(55.23-113.57) | 187.41(123.98-274.86) | 138 | 6.09(4.38-8.61) | 5.7(3.88-8.39) | -0.1(from -0.24 to 0.04) |
| Nigeria | male | 1225.88(785.71-1787.23) | 3017.72(2114.77-4262.32) | 146.17 | 6.26(4.11-8.85) | 8.4(6.01-11.56) | 1.41(from 1.24 to 1.59) |
| Niue | male | 0.13(0.1-0.15) | 0.14(0.11-0.18) | 15.35 | 13.98(11.11-16.96) | 15.62(12.32-19.77) | 0.37(from 0.34 to 0.4) |
| North Macedonia | male | 149.37(134.2-163.9) | 393.44(309.02-495.17) | 163.39 | 17.44(15.72-19.18) | 27.15(21.73-33.72) | 1.62(from 1.26 to 1.97) |
| Northern Mariana Islands | male | 1.92(1.5-2.43) | 5.66(4.73-6.56) | 194.62 | 20.9(16.72-25.35) | 25.19(21.68-28.76) | 0.79(from 0.62 to 0.96) |
| Norway | male | 798.48(769.77-820.97) | 1012.7(936.65-1080.75) | 26.83 | 27.38(26.34-28.16) | 22.54(20.83-24.07) | -0.67(from -0.81 to -0.53) |
| Oman | male | 22.6(13.92-32.11) | 72.42(54.95-98.59) | 220.44 | 7.26(4.52-10.29) | 10.12(8.04-12.53) | 1.62(from 1.38 to 1.86) |
| Pakistan | male | 1786.83(1430.12-2128.42) | 4967.91(3565.7-6779.13) | 178.03 | 5.94(4.78-7.08) | 9.38(6.86-12.64) | 1.52(from 1.26 to 1.77) |
| Palau | male | 0.31(0.24-0.4) | 0.68(0.54-0.87) | 118.9 | 7.24(5.71-9.18) | 7.69(6.29-9.37) | 0.12(from 0.08 to 0.15) |
| Palestine | male | 59.98(38.78-87.97) | 218.99(185.96-256.12) | 265.08 | 16.42(10.62-23.77) | 23.09(19.73-26.71) | 1.29(from 1.08 to 1.51) |
| Panama | male | 64.65(59.24-69.96) | 231.13(178.27-294.11) | 257.51 | 8.86(8.07-9.63) | 11.67(9-14.84) | 1.18(from 1.08 to 1.27) |
| Papua New Guinea | male | 57.44(37.38-83.31) | 176.25(124.11-244.06) | 206.84 | 6.66(4.41-9.49) | 7.78(5.55-10.5) | 0.45(from 0.41 to 0.49) |
| Paraguay | male | 61.94(53.5-72.23) | 344.49(261.86-440.29) | 456.13 | 6.22(5.36-7.26) | 13.7(10.4-17.49) | 3(from 2.76 to 3.24) |
| Peru | male | 432.36(363.1-512.4) | 1399.93(1025.52-1882.08) | 223.79 | 7.72(6.49-9.14) | 9.14(6.69-12.3) | 1.01(from 0.79 to 1.23) |
| Philippines | male | 2044.47(1774.12-2360.04) | 6385.23(4895.59-8373.58) | 212.32 | 14.06(12.16-16.37) | 17.98(13.86-23.35) | 0.71(from 0.46 to 0.96) |
| Poland | male | 4435.22(4322.38-4538.37) | 9728.55(7796.5-12036.5) | 119.35 | 26.17(25.31-26.84) | 34.11(27.43-42.05) | 0.85(from 0.66 to 1.04) |
| Portugal | male | 1494.92(1430.01-1566.36) | 2944.3(2673.02-3199.06) | 96.95 | 26.82(25.64-28.12) | 27.71(25.26-30) | 0.01(from -0.2 to 0.21) |
| Puerto Rico | male | 259.64(242.11-275.21) | 601.65(467.68-762.75) | 131.72 | 15.83(14.79-16.8) | 19.18(14.78-24.45) | 0.63(from 0.37 to 0.9) |
| Qatar | male | 5.49(3.94-7.68) | 50.73(35.61-70.38) | 824.06 | 10.53(7.6-14.38) | 13.69(10.37-18.06) | 1.52(from 1.14 to 1.91) |
| Republic of Korea | male | 1635.16(1533.5-1752.35) | 6668.91(5913.37-7407.7) | 307.84 | 15.45(14.41-17.18) | 18.6(16.39-20.84) | 0.34(from 0.04 to 0.64) |
| Republic of Moldova | male | 397.07(377.76-419) | 583.68(504.99-667.85) | 47 | 22.24(21.17-23.46) | 24.7(21.43-28.18) | 1.16(from 0.59 to 1.73) |
| Romania | male | 1909.08(1811.51-1996.58) | 4449.97(3644.03-5308.56) | 133.1 | 15.51(14.74-16.22) | 28.27(23.25-33.77) | 1.89(from 1.65 to 2.13) |
| Russian Federation | male | 12151.55(11670.02-12669.55) | 19267.13(15992.49-22930.58) | 58.56 | 21.62(20.83-22.53) | 23.1(19.25-27.29) | -0.05(from -0.35 to 0.24) |
| Rwanda | male | 124.45(95.59-153.3) | 226.86(162.34-316.56) | 82.29 | 10.27(8.06-12.52) | 10.09(7.45-13.46) | -0.56(from -0.8 to -0.33) |
| Saint Kitts and Nevis | male | 3.3(2.92-3.71) | 6.42(5.33-7.5) | 94.25 | 21.02(18.79-23.31) | 22.65(19.48-26.01) | 0.11(from -0.04 to 0.26) |
| Saint Lucia | male | 4.55(4.1-5.04) | 13.23(11.14-15.63) | 190.78 | 13.07(11.77-14.43) | 13.99(11.78-16.36) | -0.02(from -0.27 to 0.24) |
| Saint Vincent and the Grenadines | male | 3.52(3.13-3.95) | 9.95(8.54-11.47) | 182.68 | 11.74(10.53-13.05) | 15.24(13.2-17.49) | 0.76(from 0.59 to 0.93) |
| Samoa | male | 3.98(3.26-4.84) | 5.96(4.74-7.95) | 49.89 | 10.18(8.42-12.18) | 9.09(7.36-12.07) | -0.48(from -0.54 to -0.43) |
| San Marino | male | 4.23(3.56-4.99) | 8.55(5.72-11.59) | 101.82 | 30(25.38-35.07) | 27.08(17.89-37.39) | -0.24(from -0.3 to -0.19) |
| Sao Tome and Principe | male | 4.02(3.16-4.87) | 10.08(7.1-14.2) | 150.78 | 15.21(12.34-18.29) | 23.45(16.9-32.65) | 1.65(from 1.56 to 1.75) |
| Saudi Arabia | male | 198.62(130.14-286.34) | 942.1(724.51-1228) | 374.32 | 6.37(4.11-9.09) | 9.49(7.54-12.02) | 1.3(from 1.06 to 1.55) |
| Senegal | male | 135.14(103.42-169.09) | 313.8(238.78-407.99) | 132.19 | 9.02(6.89-11.2) | 9.64(7.53-12.31) | 0.34(from 0.19 to 0.49) |
| Serbia | male | 1247.46(1007.44-1449.6) | 2389.97(1914.2-2968.07) | 91.59 | 25.01(20.07-28.93) | 33.61(27.24-41.6) | 1.34(from 1.17 to 1.51) |
| Seychelles | male | 4.43(3.74-5.06) | 13.73(11.64-16.33) | 210.14 | 18.79(15.93-21.5) | 29.14(24.69-34.43) | 0.96(from 0.63 to 1.28) |
| Sierra Leone | male | 68.76(53.17-85.48) | 116.52(85.12-156.07) | 69.47 | 7.32(5.69-9.04) | 7.22(5.36-9.52) | 0.1(from -0.07 to 0.27) |
| Singapore | male | 265.97(251.35-278.51) | 588.2(534.15-638.63) | 121.16 | 29.74(28-31.35) | 17.12(15.36-18.69) | -2.23(from -2.36 to -2.09) |
| Slovakia | male | 804.56(754.68-858.27) | 1400.15(1098.07-1772.49) | 74.03 | 32.55(30.56-34.63) | 37.67(29.93-47.37) | 0.52(from 0.32 to 0.73) |
| Slovenia | male | 255.28(198.22-320.45) | 525.02(412.86-672) | 105.66 | 27.84(21.76-35) | 28.32(22.42-36.06) | -0.12(from -0.46 to 0.22) |
| Solomon Islands | male | 6.66(4.29-10.05) | 17.15(11.08-25.67) | 157.59 | 8.85(6.2-13.1) | 10.92(7.91-15.9) | 0.62(from 0.54 to 0.7) |
| Somalia | male | 69.48(47.33-126.5) | 154.69(94.71-322.77) | 122.63 | 6.37(4.34-11.26) | 5.86(3.59-11.8) | -0.17(from -0.22 to -0.11) |
| South Africa | male | 967.02(809.33-1255.81) | 2339.47(2084.05-2700.7) | 141.93 | 11.65(9.72-15.36) | 14.01(12.56-15.98) | 0.64(from 0.34 to 0.95) |
| South Sudan | male | 133.9(72.84-227.22) | 194.94(115.73-307.56) | 45.59 | 11.19(6.23-18.81) | 10.84(6.65-16.72) | -0.06(from -0.13 to 0.01) |
| Spain | male | 5293.24(5045.75-5540.69) | 11297.47(10210.02-12309.68) | 113.43 | 23.78(22.53-24.91) | 25.76(23.34-27.88) | 0.36(from 0.28 to 0.44) |
| Sri Lanka | male | 251.23(218.31-283.99) | 696.13(496.91-927.77) | 177.09 | 5.07(4.39-5.72) | 6.7(4.81-8.87) | 1.45(from 1.28 to 1.62) |
| Sudan | male | 233.76(157.24-410.44) | 707.34(471.73-1242.21) | 202.6 | 5.06(3.43-8.81) | 7.53(5.1-13.16) | 1.45(from 1.35 to 1.56) |
| Suriname | male | 15.67(13.92-17.37) | 50.41(40.66-61.44) | 221.68 | 13.45(12.01-14.99) | 19.32(15.72-23.46) | 1.36(from 1.08 to 1.64) |
| Sweden | male | 1390.3(1321.62-1456.93) | 1850.69(1706.71-1979.36) | 33.11 | 21.23(20.14-22.19) | 18.13(16.76-19.32) | -0.69(from -0.85 to -0.52) |
| Switzerland | male | 801.41(764.9-839.52) | 1219.54(1084.75-1338.4) | 52.17 | 18.87(17.96-19.77) | 15.04(13.46-16.49) | -1.09(from -1.3 to -0.89) |
| Syrian Arab Republic | male | 147.27(108.81-192.37) | 370.01(256.92-498.67) | 151.24 | 5.37(3.97-7) | 6.41(4.55-8.54) | 0.49(from 0.29 to 0.69) |
| Taiwan (Province of China) | male | 1408.94(1352.94-1464.68) | 6180.09(4827.29-7845.43) | 338.63 | 17.87(17.03-18.58) | 33.88(26.58-42.86) | 2.35(from 2.12 to 2.58) |
| Tajikistan | male | 139.3(125.17-156.96) | 239.39(190.03-296.41) | 71.86 | 10.36(9.26-11.69) | 11.65(9.38-14.31) | 1.09(from 0.58 to 1.6) |
| Thailand | male | 1939.85(1650.77-2243.1) | 5739.13(4231.91-7575.43) | 195.85 | 12.61(10.7-14.63) | 12.79(9.52-16.71) | -0.6(from -0.9 to -0.3) |
| Timor-Leste | male | 8.78(5.47-12.7) | 47.66(31.1-63.93) | 442.84 | 6.62(4.26-9.44) | 12.66(8.2-16.9) | 2.75(from 2.47 to 3.04) |
| Togo | male | 42.81(34.56-52.9) | 124.71(87.65-171.02) | 191.33 | 8.07(6.57-9.91) | 9.35(6.72-12.58) | 0.43(from 0.37 to 0.5) |
| Tokelau | male | 0.05(0.04-0.07) | 0.06(0.04-0.09) | 19.63 | 8.18(6.25-11.47) | 9.49(6.89-13.79) | 0.57(from 0.55 to 0.6) |
| Tonga | male | 1.25(0.93-1.56) | 2.19(1.65-2.76) | 75.13 | 5.22(3.89-6.51) | 6.39(4.89-7.95) | 0.55(from 0.29 to 0.8) |
| Trinidad and Tobago | male | 58.56(54.23-63) | 136.5(102.16-178.03) | 133.11 | 15.91(14.73-17.05) | 16.02(12.17-20.59) | -0.09(from -0.27 to 0.09) |
| Tunisia | male | 173.81(134.77-217.51) | 566.76(401.31-779.39) | 226.09 | 7.62(5.91-9.42) | 10.04(7.26-13.69) | 0.8(from 0.71 to 0.88) |
| Turkey | male | 2431.38(1828.24-3137.33) | 6204.63(4968.34-7576.01) | 155.19 | 14.74(11-18.77) | 15.58(12.45-18.99) | 0.59(from 0.15 to 1.03) |
| Turkmenistan | male | 73.74(69.1-79.17) | 127(101.61-159.49) | 72.24 | 8.64(8.07-9.27) | 8.15(6.57-10.12) | -0.26(from -0.76 to 0.24) |
| Tuvalu | male | 0.28(0.22-0.34) | 0.49(0.35-0.67) | 76.52 | 10.38(8.32-12.63) | 11.1(7.94-14.94) | 0.08(from 0.04 to 0.13) |
| Uganda | male | 243.14(197.89-288.97) | 816.57(604-1022.69) | 235.84 | 8.41(6.87-9.91) | 14.35(10.78-17.75) | 1.79(from 1.6 to 1.98) |
| Ukraine | male | 6811.4(6531.43-7097.69) | 7706.19(6153.28-9419.53) | 13.14 | 27.17(26.04-28.33) | 27.18(21.88-33.09) | -0.82(from -1.15 to -0.49) |
| United Arab Emirates | male | 33.59(19.43-49.63) | 315.44(213.08-430.05) | 839.17 | 19.85(12.05-27.65) | 18.43(12.91-25.03) | -0.57(from -0.95 to -0.18) |
| United Kingdom | male | 10869.51(10556.78-11073.49) | 12778.07(11950.07-13293.82) | 17.56 | 29.96(28.89-30.59) | 21.77(20.38-22.63) | -1.37(from -1.49 to -1.26) |
| United Republic of Tanzania | male | 423.11(335.4-562.03) | 1109.62(825.84-1570.72) | 162.26 | 8.81(7.13-11.39) | 10.38(7.99-14.12) | 0.57(from 0.52 to 0.62) |
| United States of America | male | 32007.9(30831.1-32896.55) | 43825.54(41775.32-45346.32) | 36.92 | 24.28(23.27-24.98) | 17.53(16.71-18.13) | -1.4(from -1.53 to -1.27) |
| United States Virgin Islands | male | 7.18(5.87-8.49) | 27.09(21.77-32.74) | 277.37 | 20.34(16.78-24) | 34.35(27.86-41.25) | 2.37(from 2.04 to 2.7) |
| Uruguay | male | 502.37(477.01-528.92) | 715.73(656.11-776.12) | 42.47 | 30.62(28.97-32.23) | 31.4(28.81-33.97) | 0.04(from -0.05 to 0.13) |
| Uzbekistan | male | 398.33(377.22-418.1) | 820.39(685.25-972.85) | 105.96 | 7.91(7.49-8.34) | 10.95(9.39-12.63) | 1.14(from 1.01 to 1.26) |
| Vanuatu | male | 2.7(1.86-3.63) | 8.26(6.07-11.08) | 205.62 | 8.1(5.68-10.55) | 9.87(7.43-12.98) | 0.58(from 0.47 to 0.68) |
| Venezuela (Bolivarian Republic of) | male | 364.39(342.58-385.77) | 1589.66(1183.88-2098.78) | 336.25 | 8.33(7.76-8.81) | 12.13(9.11-15.73) | 0.88(from 0.57 to 1.19) |
| Viet Nam | male | 1873.72(1473.47-2340.1) | 9475.75(7434.91-11734.12) | 405.72 | 11.92(9.35-14.76) | 25.69(20.61-31.04) | 3(from 2.86 to 3.13) |
| Yemen | male | 118.95(67.65-195.85) | 415.1(292.4-605.2) | 248.96 | 5.57(3.23-9.07) | 6.84(4.93-9.89) | 1.06(from 0.93 to 1.19) |
| Zambia | male | 150.63(117.84-187.97) | 436.22(315.1-559.87) | 189.59 | 11.12(8.68-13.8) | 14.84(10.86-18.85) | 0.92(from 0.83 to 1) |
| Zimbabwe | male | 181.74(153.74-211.77) | 347.55(262.16-434.32) | 91.24 | 10.21(8.79-11.73) |  | 0.22(from -0.2 to 0.64) |

**Table S8** The DALY and age-standardized DALY rate of Colorectal cancer in 1990 and 2019, and its temporal trends from 1990 to 2019.

| nation | sex | DLAY NO(95% UI) | | Change in absolute number (%) | age-standardized DALY rate  per 100,000 No. (95% UI) | | 1990-2019 EAPC No.(95 CI) |
| --- | --- | --- | --- | --- | --- | --- | --- |
| 1990 | 2019 | 1990 | 2019 |
| Afghanistan | both | 15233.44(8390.48-24151.3) | 33294.6(20503.51-46503.32) | 118.56 | 202.57(115.72-317.7) | 209.28(137.22-281.82) | 0.31(from 0.12 to 0.5) |
| Albania | both | 4476.63(4186.62-4783.55) | 8224.82(6122.18-10807.93) | 83.73 | 198.19(184.32-212.03) | 204.54(153.05-268.24) | 0.49(from 0.21 to 0.76) |
| Algeria | both | 20200.68(16361.19-24755.52) | 57596.29(45213.58-72440.09) | 185.12 | 156.73(128.28-189.89) | 166.05(130.81-206.55) | 0.22(from 0.18 to 0.25) |
| American Samoa | both | 90.81(74.07-106) | 180.46(148.4-218.82) | 98.73 | 360.68(295.78-419.88) | 368.48(306.68-443.41) | 0.14(from 0.02 to 0.27) |
| Andorra | both | 322.98(248.09-433.65) | 649.24(496.53-829.15) | 101.01 | 581.93(450.2-772.22) | 466.28(355.25-596.45) | -0.84(from -0.88 to -0.79) |
| Angola | both | 8567.5(6019.08-12682.92) | 27808.76(20726.76-35928.19) | 224.58 | 190.83(134.84-274.98) | 218.39(169.99-277.41) | 0.57(from 0.38 to 0.75) |
| Antigua and Barbuda | both | 135.55(124.8-147.29) | 326.75(278.01-381.87) | 141.06 | 257.7(237.73-280.06) | 323.04(276.77-374.87) | 0.69(from 0.56 to 0.82) |
| Argentina | both | 146536.67(141134.47-151308.15) | 267945.7(252346.32-283535.29) | 82.85 | 453.16(436.05-467.73) | 506.59(477.23-536.56) | 0.29(from 0.17 to 0.41) |
| Armenia | both | 10517.46(10027.37-11053.89) | 13091.17(10973.77-15395.52) | 24.47 | 361.64(345.35-380.51) | 319.73(267.43-375.2) | -0.54(from -0.66 to -0.42) |
| Australia | both | 100656.35(97101.67-103850.47) | 131641.88(120903.67-141505.38) | 30.78 | 522.89(504.4-539.15) | 334.62(309.16-359.07) | -1.9(from -2.06 to -1.74) |
| Austria | both | 66622.26(64172.06-68809.07) | 46853.56(43157.71-50276.64) | -29.67 | 587.75(566.7-607.44) | 275.36(254.23-294.83) | -3.09(from -3.24 to -2.93) |
| Azerbaijan | both | 16946.26(15616.19-18256.56) | 30658.07(25243.92-37395.56) | 80.91 | 300.98(278.57-323.71) | 296.94(244.86-362.68) | 0.32(from -0.18 to 0.83) |
| Bahamas | both | 676.77(621.57-737.64) | 1708.86(1389.93-2098.41) | 152.5 | 405.92(373.53-441.21) | 423.59(346.43-515.52) | 0.4(from 0.31 to 0.49) |
| Bahrain | both | 566.14(473.12-660.83) | 2475.51(1882.09-3176.02) | 337.27 | 268.98(223.12-316.41) | 223.72(174.97-280.03) | -0.93(from -1.18 to -0.68) |
| Bangladesh | both | 55919.46(41647.4-73241.44) | 143863.18(99756.11-205794.66) | 157.27 | 108.5(80.37-143.7) | 107.39(74.61-152.66) | -0.07(from -0.18 to 0.03) |
| Barbados | both | 1058.36(985.49-1123.09) | 2392.43(1977.42-2864.83) | 126.05 | 380.23(353.91-404.48) | 500.61(413.4-600.86) | 0.94(from 0.77 to 1.11) |
| Belarus | both | 56226.38(54237.65-58379.18) | 60383.78(47969.61-78137.16) | 7.39 | 436.77(421.42-453.2) | 388.65(308.85-500.2) | -1.23(from -1.53 to -0.94) |
| Belgium | both | 75019.71(71683.58-77747.39) | 73674.41(67680.74-79242.02) | -1.79 | 499.39(477.6-517.93) | 337.46(312.89-361.05) | -1.5(from -1.57 to -1.44) |
| Belize | both | 144.39(132.22-158.19) | 716.21(622.02-828.69) | 396.01 | 150.03(137.49-164.35) | 239.67(209.14-276.42) | 1.4(from 0.95 to 1.85) |
| Benin | both | 3022.35(2548.21-3596.17) | 8549.07(6538.57-11330.12) | 182.86 | 142.68(120.6-169.07) | 161.49(126.51-209.13) | 0.49(from 0.45 to 0.53) |
| Bermuda | both | 351.85(323.39-378.91) | 469.05(390.4-570.86) | 33.31 | 561.3(516.37-603.82) | 375.63(311.21-456.77) | -1.38(from -1.51 to -1.25) |
| Bhutan | both | 292.78(166.19-425.75) | 837.57(494.97-1145.87) | 186.08 | 106.24(60.58-153.4) | 145.09(87.21-196.68) | 1.04(from 1.01 to 1.08) |
| Bolivia (Plurinational State of) | both | 6751.1(4877.6-8467.9) | 23073.9(16068.49-30577.65) | 241.78 | 197.21(141.4-246.12) | 256.2(178.19-339.74) | 0.82(from 0.78 to 0.87) |
| Bosnia and Herzegovina | both | 14309.61(13549.28-15122.98) | 28248.89(22240.89-35384.85) | 97.41 | 335.07(317.61-355.24) | 490.14(386.13-613.75) | 1.6(from 1.34 to 1.86) |
| Botswana | both | 1428.71(1061.61-1903.68) | 5193.72(3524.45-7134.98) | 263.52 | 235.18(177.88-307.64) | 346.16(240.56-464.49) | 0.99(from 0.63 to 1.34) |
| Brazil | both | 218845.35(212137.38-225103.63) | 644732.25(611425.96-672419.42) | 194.61 | 228.94(220.57-235.88) | 268.3(254.01-279.82) | 0.64(from 0.47 to 0.82) |
| Brunei Darussalam | both | 725.15(614.47-856.37) | 2012.71(1770.82-2279.85) | 177.56 | 651.4(549.93-766.51) | 626.13(552.5-710.03) | 0.46(from 0.17 to 0.76) |
| Bulgaria | both | 59038.04(56002.57-61950.19) | 78043.16(62257.42-96599.91) | 32.19 | 476.62(452.59-499.88) | 582.28(462.42-724.9) | 1.87(from 1.41 to 2.34) |
| Burkina Faso | both | 5859.46(4631.89-7461.62) | 15422.37(11861.79-19946.66) | 163.2 | 128.42(102.56-161.7) | 156.02(122.42-198.61) | 0.66(from 0.49 to 0.83) |
| Burundi | both | 5036.44(3881.03-6564.92) | 8860.41(6209.89-12874.34) | 75.93 | 195.81(153.04-252.31) | 168.44(119.73-243.22) | -0.73(from -0.84 to -0.61) |
| Cabo Verde | both | 231.78(208.88-256.04) | 950.77(779.42-1123.77) | 310.21 | 101.9(91.98-112.28) | 218.23(177.17-258.21) | 2.14(from 1.88 to 2.41) |
| Cambodia | both | 11561.93(8657.3-15018.83) | 42134.74(32918.57-52152.73) | 264.43 | 225.55(172.58-292.73) | 329.14(260.67-401.68) | 1.35(from 1.3 to 1.39) |
| Cameroon | both | 9700.27(7609.3-11878.22) | 30027.46(21576.88-40867.98) | 209.55 | 203.19(160.37-248.59) | 229.27(169.99-303.21) | 0.46(from 0.42 to 0.51) |
| Canada | both | 138053.77(133080.34-142886.19) | 225955.96(207793.9-242471.14) | 63.67 | 431.13(415.56-446.01) | 346.04(320.13-370.62) | -0.81(from -0.87 to -0.75) |
| Central African Republic | both | 2434.03(1744.25-3135.71) | 4003.93(2785.68-5605.3) | 64.5 | 183.07(135.61-234.75) | 156.2(112.89-216.3) | -0.46(from -0.53 to -0.4) |
| Chad | both | 3502.42(2682.68-4395.88) | 9761.01(7358.51-12986.55) | 178.69 | 118.69(91.15-148.7) | 159.61(122.05-210.83) | 1.16(from 1.1 to 1.23) |
| Chile | both | 26552.69(25458.77-27608.53) | 70896.24(65757.08-75714.07) | 167 | 262.18(250.5-272.24) | 298.51(277.46-318.65) | 0.73(from 0.61 to 0.86) |
| China | both | 2271313.75(1988093.03-2566704.68) | 6394917.88(5462291.04-7408703.3) | 181.55 | 245.6(215.43-276.4) | 320.57(275.4-370.7) | 1.24(from 1.01 to 1.48) |
| Colombia | both | 39883.13(38353.29-41352.35) | 116741.97(90050.52-150159.03) | 192.71 | 209.15(200.19-217.59) | 222.16(171.25-285.57) | 0.19(from 0.09 to 0.28) |
| Comoros | both | 420.23(216.23-590.17) | 995.94(702.36-1310.51) | 137 | 179.88(98.5-247.08) | 194.38(139.51-252.22) | 0.1(from -0.05 to 0.26) |
| Congo | both | 3321.89(2138.79-4521) | 7544.51(5344.36-10226.2) | 127.12 | 282.59(188.19-378.81) | 257.21(189-341.63) | -0.4(from -0.6 to -0.21) |
| Cook Islands | both | 24.64(19.95-29.64) | 40.2(32.94-48.98) | 63.15 | 186.88(152.57-222.58) | 168.32(136.51-206.93) | -0.45(from -0.69 to -0.21) |
| Costa Rica | both | 3918.5(3701.76-4133.78) | 17592.67(13678.83-22430.11) | 348.96 | 212.38(199.58-224.46) | 340.37(264.82-432.56) | 1.81(from 1.67 to 1.94) |
| Croatia | both | 31342.75(29503.33-33327.22) | 44361.72(35210.61-55454.83) | 41.54 | 492.13(463.51-523.46) | 529.25(415.54-665.79) | 0.47(from 0.29 to 0.64) |
| Cuba | both | 34701.03(33208.8-36008.34) | 68409(56038.43-83588.55) | 97.14 | 335.85(321.07-348.65) | 368.99(300.52-452.16) | 0.29(from 0.13 to 0.44) |
| Cyprus | both | 2069.09(1848.35-2319.3) | 5205.01(4554.67-5928.18) | 151.56 | 259.44(231.72-290.02) | 273.58(239.23-311.54) | 0.39(from 0.18 to 0.61) |
| Czechia | both | 101988.83(98642.26-105224.49) | 91539.53(75040.1-111252.61) | -10.25 | 749.25(724.47-773.01) | 452.09(370.11-551.18) | -1.92(from -2.11 to -1.74) |
| C么te d'Ivoire | both | 9017.43(6899.35-11664.94) | 23372.98(17375.65-30279.61) | 159.2 | 197.39(153.07-252.2) | 199.35(155.14-250.85) | -0.25(from -0.37 to -0.12) |
| Democratic People's Republic of Korea | both | 49542.66(36311.58-65566.08) | 92302.48(67639.4-122530.65) | 86.31 | 277.45(209.18-363.29) | 282.68(207.22-376.72) | 0.16(from 0.1 to 0.22) |
| Democratic Republic of the Congo | both | 26961.32(20729.03-36126.87) | 56267.3(38082.77-83820.18) | 108.7 | 155.81(120.78-209.28) | 141.4(95.13-210.53) | -0.47(from -0.79 to -0.16) |
| Denmark | both | 40444.37(39069.17-41776.8) | 47754.81(43566.28-51734.41) | 18.08 | 522.47(504.79-538.79) | 431.1(395.7-464.94) | -1.08(from -1.3 to -0.85) |
| Djibouti | both | 345.57(231.53-486.17) | 1739.32(1180.77-2489.81) | 403.33 | 206.05(142.61-283.45) | 253.1(184.43-346.65) | 0.73(from 0.67 to 0.79) |
| Dominica | both | 181.67(160.15-204.09) | 277.26(226.81-341.73) | 52.62 | 262.44(230.54-296.84) | 314.39(256.73-387.28) | 0.77(from 0.72 to 0.83) |
| Dominican Republic | both | 6705.65(5937.2-7568.66) | 26797.16(18886.79-35320.58) | 299.62 | 164.97(145.85-186.16) | 279.23(198.18-367.55) | 2.36(from 2.19 to 2.53) |
| Ecuador | both | 8842.03(8367.65-9321.78) | 36473.35(28821.19-46627.34) | 312.5 | 155.19(146.77-164.25) | 237.62(188.89-300.98) | 1.95(from 1.67 to 2.23) |
| Egypt | both | 46800.8(42961.11-51297.86) | 133037.55(95340.19-183321.23) | 184.26 | 138.04(126.92-150.01) | 184.4(133.58-253.62) | 1.02(from 0.95 to 1.1) |
| El Salvador | both | 3697.83(3472.16-3927.72) | 12658.02(9679.04-16507.89) | 242.31 | 115.78(108.28-123.39) | 213.49(162.59-278.99) | 1.94(from 1.61 to 2.28) |
| Equatorial Guinea | both | 344.27(232.44-478.32) | 1653.2(1002.17-2514.41) | 380.2 | 158.37(108.26-218.53) | 305.61(189.89-449.5) | 3.06(from 2.79 to 3.32) |
| Eritrea | both | 2002.37(1408.65-2670.7) | 7614.68(5658.74-10147.98) | 280.28 | 165.25(117.49-220.28) | 239.02(183.66-310.22) | 1.04(from 0.77 to 1.31) |
| Estonia | both | 9207.13(8786.97-9627.4) | 9664.72(7667-12204.86) | 4.97 | 452.83(432.31-473.54) | 384.18(304.24-486.56) | -0.7(from -0.89 to -0.5) |
| Eswatini | both | 714.91(540.8-930.34) | 1924.18(1263.67-2737.78) | 169.15 | 225.68(171.4-293.44) | 304.69(203.61-426.76) | 1.19(from 0.76 to 1.63) |
| Ethiopia | both | 43543.96(30799.79-65499.87) | 79045.27(58534.71-109670.83) | 81.53 | 186.46(133.42-286) | 168.57(124.78-236.04) | -0.5(from -0.77 to -0.24) |
| Fiji | both | 894.76(722.9-1087.74) | 2005.7(1563.31-2522.67) | 124.16 | 215.52(175.86-261.23) | 258.1(204.68-320.4) | 0.8(from 0.59 to 1.02) |
| Finland | both | 21398.08(20453.53-22146.57) | 28875.9(26508.78-31339.14) | 34.95 | 306.45(292.9-316.99) | 253.56(233.43-275.07) | -0.7(from -0.74 to -0.66) |
| France | both | 381365.85(364683.61-395730.46) | 422215.01(381664.2-458064.39) | 10.71 | 474.28(454.79-490.76) | 328.65(300.66-354.38) | -1.42(from -1.48 to -1.35) |
| Gabon | both | 1961.23(1269.54-2957.35) | 3710.43(2596.58-4831.83) | 89.19 | 334.4(219.21-501.07) | 330.59(237.6-418.63) | -0.15(from -0.23 to -0.08) |
| Gambia | both | 400.18(298.82-521.05) | 1463.47(1031.84-1977.94) | 265.7 | 103.85(79.16-132.63) | 142.69(101.59-191.73) | 0.93(from 0.75 to 1.11) |
| Georgia | both | 18687.68(17075.24-20376.14) | 18328.23(15328.15-21548.86) | -1.92 | 300.27(275.12-326.82) | 333.85(279.68-393.72) | 1.31(from 0.78 to 1.85) |
| Germany | both | 625807.33(601663.78-646368.61) | 647921.02(598987.32-694996.48) | 3.53 | 505.56(486.9-521.06) | 360.72(336.71-385.91) | -1.54(from -1.99 to -1.09) |
| Ghana | both | 10092.6(8045.79-12459.49) | 34863.02(26474.93-45098.21) | 245.43 | 142.56(115.75-174.98) | 194.16(152.14-246.86) | 1.13(from 1.09 to 1.16) |
| Greece | both | 42386.06(40404.95-44087.74) | 66397.4(60981.59-71241.06) | 56.65 | 283.09(269.83-294.08) | 297.9(277.05-318.58) | -0.21(from -0.36 to -0.07) |
| Greenland | both | 262.31(226.7-303.69) | 481.75(390.06-583.2) | 83.66 | 688.02(606.84-783.73) | 680.34(555.71-812.37) | -0.4(from -0.66 to -0.13) |
| Grenada | both | 223.06(203.81-243.84) | 466.44(419.12-517.18) | 109.11 | 320.98(292.4-353.02) | 414.83(373.95-457.82) | 1.02(from 0.88 to 1.15) |
| Guam | both | 299.55(257.79-343.52) | 645.18(538.7-768.87) | 115.39 | 361.19(305.36-419.47) | 341.58(286.5-407.53) | -0.14(from -0.48 to 0.2) |
| Guatemala | both | 4711.37(4147.4-5287.71) | 24461.99(19260.05-30977.55) | 419.21 | 115.95(102.63-129.32) | 203.06(160.17-255.99) | 1.99(from 1.7 to 2.29) |
| Guinea | both | 4370.65(3676.84-5103.24) | 9410.58(7035.22-12395.33) | 115.31 | 127.13(107.02-148.22) | 159.61(120.6-209.46) | 0.91(from 0.87 to 0.94) |
| Guinea-Bissau | both | 918.61(626.58-1196) | 1692.1(1241.13-2180.58) | 84.2 | 204.79(141.24-263.64) | 205.78(153.24-262.28) | 0.07(from 0.02 to 0.11) |
| Guyana | both | 1215.62(1046.88-1390.61) | 2295(1773.31-2935.99) | 88.79 | 294.36(255.29-335.76) | 344.8(269.19-437.87) | 0.55(from 0.38 to 0.72) |
| Haiti | both | 8524.34(5603-10650.73) | 18317.23(12572.45-25414.03) | 114.88 | 238.33(156.68-294.1) | 239.76(166-328.98) | 0.23(from 0.12 to 0.33) |
| Honduras | both | 2702.5(2221.9-3149.4) | 10630.79(7442.16-15136.92) | 293.37 | 114.45(93.22-133.42) | 167.71(117.06-239.15) | 1.41(from 1.31 to 1.51) |
| Hungary | both | 95738.16(92440.17-99057.96) | 115100.97(94609.24-138287.29) | 20.22 | 662.19(639.43-684.89) | 630.26(519.2-763.47) | -0.36(from -0.55 to -0.18) |
| Iceland | both | 865.41(805.74-925.55) | 1291(1158.72-1435.68) | 49.18 | 309.2(287.88-330.27) | 241.2(216.54-267.52) | -1.03(from -1.17 to -0.89) |
| India | both | 643722.5(563008.22-733226.76) | 1998681.15(1694555.78-2358982.5) | 210.49 | 128.02(111.76-146) | 169.06(143.8-199) | 0.79(from 0.65 to 0.94) |
| Indonesia | both | 244186.94(184119.98-292022.92) | 807987.82(557415.64-1039822.79) | 230.89 | 217.24(165.52-258.47) | 350.62(240.62-450) | 1.64(from 1.52 to 1.75) |
| Iran (Islamic Republic of) | both | 48384.64(39871.84-58026.99) | 159445.01(148775.84-171672.32) | 229.54 | 165.6(136.58-198.69) | 206.73(192.19-222.07) | 0.97(from 0.81 to 1.14) |
| Iraq | both | 14676.54(10672.73-20344.46) | 51190.82(39091.18-66602.11) | 248.79 | 171.88(125.56-238.92) | 195.18(151.48-247.35) | 0.66(from 0.46 to 0.86) |
| Ireland | both | 21737.37(20898.94-22576.61) | 26561.93(24282.72-28836.47) | 22.19 | 545.58(524.66-566.66) | 362.73(332.19-392.64) | -1.6(from -1.67 to -1.53) |
| Israel | both | 20929.37(19936.34-21869.34) | 36383.51(33302.17-39184.86) | 73.84 | 436.85(415.07-455.84) | 322.98(296.74-346.83) | -1.81(from -2.12 to -1.51) |
| Italy | both | 360137.69(349208.76-368567.99) | 436750.2(402100.2-459967.4) | 21.27 | 418.41(405.66-427.91) | 330.96(309.6-347) | -1(from -1.13 to -0.88) |
| Jamaica | both | 3973.04(3720.28-4209.85) | 11262.83(8961.81-14208.05) | 183.48 | 223.96(210.09-237.73) | 378.88(301.53-477.61) | 1.93(from 1.58 to 2.29) |
| Japan | both | 703779.61(678942.79-721233.2) | 1055344.98(938926.73-1126078.46) | 49.95 | 417.24(401.66-427.87) | 342.98(316.02-361.46) | -0.82(from -0.87 to -0.76) |
| Jordan | both | 4474.82(3661.91-5477.79) | 20411.15(16994.86-24616.81) | 356.13 | 289.8(236.02-354.12) | 282.69(235.46-339.66) | 0.01(from -0.07 to 0.09) |
| Kazakhstan | both | 51309.91(48742.6-53838.32) | 54852.79(47240.38-63021.18) | 6.9 | 383.98(364.77-403.12) | 307.7(266.97-351.68) | -0.63(from -0.76 to -0.49) |
| Kenya | both | 10601.15(6945.45-13227.96) | 45322.22(35339.75-57167.06) | 327.52 | 116.91(75.72-145.5) | 183.83(144.52-230.45) | 1.92(from 1.73 to 2.11) |
| Kiribati | both | 122.07(98.48-149.18) | 208.79(153.61-280.67) | 71.04 | 280.98(227.13-341.02) | 263.35(197.63-350.12) | -0.42(from -0.48 to -0.35) |
| Kuwait | both | 1186.02(1066.42-1296.79) | 5693.31(4768.36-6823.72) | 380.03 | 160.01(142.7-177.66) | 202.28(168.79-242.15) | 1.56(from 1.06 to 2.06) |
| Kyrgyzstan | both | 9643.16(9074.33-10276.53) | 8817.07(7649.31-10118.28) | -8.57 | 302.18(284.01-322.59) | 182.46(158.82-208.02) | -1.99(from -2.22 to -1.77) |
| Lao People's Democratic Republic | both | 6128.42(4015.32-8313.63) | 15427.41(10928.93-20823.42) | 151.74 | 261.73(175.02-352.85) | 315.07(224.24-419.85) | 0.48(from 0.42 to 0.54) |
| Latvia | both | 15002.61(14399.77-15619.49) | 14161.75(11809.63-17164.57) | -5.6 | 424.51(407.56-441.98) | 377.36(314.55-460.4) | -0.54(from -0.81 to -0.26) |
| Lebanon | both | 6803.08(5273.91-8686.81) | 19494.51(15742.79-24698.57) | 186.55 | 293.08(228.23-371.22) | 372.53(300.31-471.78) | 1.34(from 1.16 to 1.51) |
| Lesotho | both | 1435.38(1102.86-2051.86) | 3599.93(2528.55-4837.15) | 150.8 | 141.87(110.19-202.9) | 266.15(190.69-354.14) | 2.69(from 2.46 to 2.92) |
| Liberia | both | 1722.37(1412.12-2093.53) | 3163.16(2077.9-4534.18) | 83.65 | 149.72(123.22-181.33) | 140.64(95.2-199.87) | 0.25(from -0.11 to 0.61) |
| Libya | both | 5910.58(4184.45-8650.78) | 17139.94(12333.65-22492.91) | 189.99 | 286.86(203.87-417.79) | 298.15(217.65-385.98) | 0.32(from 0.17 to 0.48) |
| Lithuania | both | 17571.33(16937.2-18299.64) | 19672.78(16149.33-23901.04) | 11.96 | 393.85(379.91-409.98) | 365.57(299.13-446.11) | -0.28(from -0.51 to -0.05) |
| Luxembourg | both | 2950.27(2793.9-3111.83) | 3075.37(2664.6-3506.41) | 4.24 | 550.17(521.28-579.57) | 313.45(273.07-358.22) | -2.11(from -2.28 to -1.94) |
| Madagascar | both | 9542.41(7533.44-11467.93) | 21577.34(15498.84-29044.17) | 126.12 | 164.29(131.87-194.25) | 167.6(123.66-224.62) | 0.04(from -0.02 to 0.09) |
| Malawi | both | 4569.88(3783.35-5352.89) | 10733.41(7919.74-13893.72) | 134.87 | 107.99(90.56-125.4) | 134.71(102.06-170.71) | 0.85(from 0.69 to 1.02) |
| Malaysia | both | 34728.35(31055.62-38442.41) | 114325.91(88561.04-142866.6) | 229.2 | 355.26(315.51-397.02) | 421.97(331.7-524.81) | 0.09(from -0.12 to 0.3) |
| Maldives | both | 205.92(138.76-267.46) | 565.8(464.87-676.22) | 174.76 | 209.76(149.97-266.32) | 173.76(141.99-207.25) | -1.15(from -1.37 to -0.94) |
| Mali | both | 6730.26(5645.69-7860.9) | 16326.67(12539.92-21004.06) | 142.59 | 151.73(127.92-176.91) | 174.98(136.71-220.57) | 0.48(from 0.41 to 0.55) |
| Malta | both | 1491.36(1396.52-1587.27) | 2546.78(2253.88-2880.43) | 70.77 | 349.5(327.12-371.56) | 289.73(256.51-327.33) | -0.57(from -0.68 to -0.47) |
| Marshall Islands | both | 49.23(40.89-58.81) | 116.68(85.23-154.73) | 137.03 | 260.41(217.07-312.45) | 293.44(220.23-379.31) | 0.43(from 0.38 to 0.47) |
| Mauritania | both | 2012.43(1504.67-2493.97) | 3583.05(2606.26-4671.34) | 78.05 | 191.63(143.07-236.69) | 167.99(123.99-213.56) | -0.31(from -0.48 to -0.14) |
| Mauritius | both | 1480.2(1396.76-1574.44) | 5090.58(4105.53-6239.03) | 243.91 | 189.4(178-201.57) | 290.71(235.59-355.51) | 1.48(from 1.33 to 1.63) |
| Mexico | both | 66859.68(65183.47-68145.62) | 260197.79(223548.9-299468.03) | 289.17 | 142.3(137.97-145.57) | 215.34(185.07-247.2) | 1.53(from 1.45 to 1.61) |
| Micronesia (Federated States of) | both | 145.87(109.1-186.11) | 241.09(157.91-328.6) | 65.28 | 277.55(209.89-352.54) | 310.1(213.85-410.98) | 0.31(from 0.28 to 0.35) |
| Monaco | both | 307.8(244.62-372.53) | 435.61(350.15-522.76) | 41.52 | 473.45(377.85-572.06) | 494.14(392.6-604.35) | 0.25(from 0.17 to 0.33) |
| Mongolia | both | 2475.26(2026-2989.2) | 5657.92(4365.6-7438.41) | 128.58 | 217.61(178.12-262.96) | 215.52(169.22-277.76) | -0.57(from -0.75 to -0.39) |
| Montenegro | both | 2047.21(1728.67-2339.41) | 3663.37(3013.94-4386.29) | 78.94 | 323.67(273.46-368.56) | 377.31(309.51-451.69) | 0.78(from 0.69 to 0.87) |
| Morocco | both | 21753.94(17711.86-25487.96) | 63649.9(47435.36-81128.43) | 192.59 | 147.88(119.17-173.31) | 193.64(145.41-245.01) | 0.89(from 0.78 to 1) |
| Mozambique | both | 6954.65(5592.64-8403.65) | 22365.41(15783.49-29823.69) | 221.59 | 111(91.14-132.16) | 189.23(136.72-248.62) | 2.33(from 2.16 to 2.5) |
| Myanmar | both | 59027.86(44309.58-80187.71) | 148390.63(107637.34-195589.8) | 151.39 | 226.74(173.88-309.84) | 302.63(221.37-393.38) | 1.1(from 0.99 to 1.2) |
| Namibia | both | 989.57(770.63-1237.17) | 2773.84(2113.61-3678.63) | 180.31 | 130.94(103.21-162.02) | 188.2(145.63-244.81) | 1.33(from 1.17 to 1.49) |
| Nauru | both | 21.06(13.18-30.78) | 21.97(13.95-29.31) | 4.29 | 439.05(287.06-631.06) | 398.53(268.24-519.93) | -0.51(from -0.72 to -0.31) |
| Nepal | both | 9091.81(6076.27-12494.84) | 26399.41(18642.34-36362.25) | 190.36 | 86.58(57.79-119.38) | 115.83(82.13-158.49) | 1.04(from 0.79 to 1.29) |
| Netherlands | both | 93458.39(89628.04-96622.49) | 142372.2(130386.73-153821.48) | 52.34 | 478.93(460.21-494.9) | 435.34(402.27-469.36) | -0.42(from -0.51 to -0.33) |
| New Zealand | both | 25494.82(24451.89-26573.03) | 31606.23(29269-33828.86) | 23.97 | 667.47(639.95-696.04) | 423.08(394.65-449.83) | -1.79(from -1.91 to -1.66) |
| Nicaragua | both | 2441.75(2125.97-2741.15) | 10192.41(8311.18-12295.06) | 317.42 | 141.22(120.47-160.94) | 223.55(184.68-266.06) | 1.77(from 1.59 to 1.95) |
| Niger | both | 3807.75(2877.9-5031.56) | 10058.85(7150.1-14047) | 164.17 | 122.59(93.43-160.98) | 119.84(87.9-163.98) | -0.07(from -0.19 to 0.05) |
| Nigeria | both | 60783.04(43186.28-83079.44) | 157285.24(116487.34-205168.15) | 158.77 | 134.58(96.94-181.25) | 174.68(132.49-223.99) | 1.28(from 1.11 to 1.46) |
| Niue | both | 6.3(5.18-7.67) | 6.51(4.92-8.39) | 3.28 | 294.56(240.85-359.87) | 307.45(230.01-399.44) | 0.08(from 0.04 to 0.12) |
| North Macedonia | both | 6872.56(6289.38-7399.92) | 15695.43(12332.68-19726.94) | 128.38 | 354.5(324.6-381.82) | 487.48(386.3-610.72) | 1.18(from 0.94 to 1.42) |
| Northern Mariana Islands | both | 102.28(77.58-131.32) | 219.98(180.87-261.35) | 115.08 | 441.84(352.33-543.59) | 404.71(339.89-472.04) | -0.31(from -0.44 to -0.18) |
| Norway | both | 30893.88(29686.14-31745.38) | 36431.98(33543.92-38790.41) | 17.93 | 479.39(463.47-492.46) | 393.9(364.53-418.86) | -0.67(from -0.82 to -0.52) |
| Oman | both | 1282.36(865.26-1763.52) | 3788.89(2998.12-5029.17) | 195.46 | 170.59(116.59-233.9) | 199.12(162.35-243.38) | 0.9(from 0.58 to 1.22) |
| Pakistan | both | 77681.61(66196.84-89590.76) | 249316.21(199384.29-312981.18) | 220.95 | 127.68(109.09-147.26) | 198.31(159.17-248.72) | 1.43(from 1.16 to 1.7) |
| Palau | both | 30.56(23.23-40.46) | 62.38(48.01-79.62) | 104.11 | 299.7(229.74-394.39) | 291.27(228.28-362.99) | -0.11(from -0.19 to -0.04) |
| Palestine | both | 3246.6(2191.45-4531.43) | 11254.41(9574.28-13094.79) | 246.65 | 348.53(234.65-485.15) | 434.66(368.82-503.88) | 0.89(from 0.66 to 1.13) |
| Panama | both | 3060.1(2877.29-3243.65) | 9973.67(7720.44-12719.35) | 225.93 | 196.06(183.32-208.14) | 239.85(185.57-305.38) | 0.97(from 0.88 to 1.06) |
| Papua New Guinea | both | 3233.62(2195-4344.11) | 9813.19(6952.44-13274.1) | 203.47 | 150.87(101.75-201.78) | 175.74(126.62-233.15) | 0.46(from 0.42 to 0.5) |
| Paraguay | both | 3250.57(2903.8-3636.51) | 15396.31(11738.62-19749.56) | 373.65 | 137.97(123.09-154.57) | 268.59(206.36-343.2) | 2.58(from 2.38 to 2.78) |
| Peru | both | 22441.28(19258.54-26025.44) | 66030.32(49368.48-86743.17) | 194.24 | 175.79(150.95-203.84) | 203.86(152.35-267.92) | 0.69(from 0.48 to 0.91) |
| Philippines | both | 113141.84(101036.5-123949.57) | 320716.31(265900.39-389974.7) | 183.46 | 320.78(285.59-356.82) | 370.31(308.32-447.42) | 0.34(from 0.08 to 0.59) |
| Poland | both | 208520.21(203260.63-212561.48) | 350819.3(296650.44-412619.34) | 68.24 | 477.99(465.58-487.34) | 517.99(437.26-610.63) | 0.15(from 0.01 to 0.29) |
| Portugal | both | 61985.94(59819-64043.39) | 92569.01(85463.7-99117.98) | 49.34 | 459.65(442.95-474.55) | 421.32(391.75-449.51) | -0.43(from -0.62 to -0.23) |
| Puerto Rico | both | 10933.93(10402.33-11454.04) | 22451.12(17567.51-28604.61) | 105.33 | 302.93(287.92-317.32) | 353.88(274.84-454.92) | 0.44(from 0.24 to 0.65) |
| Qatar | both | 355.3(275.36-463.08) | 2644.18(1936.43-3535.25) | 644.21 | 271.89(204.05-341.65) | 282.97(218.24-354.53) | 0.62(from 0.31 to 0.92) |
| Republic of Korea | both | 89317.03(85257.55-93793.69) | 246589.57(222651.43-270173.56) | 176.08 | 272.25(258.97-286.49) | 280.81(253.86-307.51) | -0.29(from -0.57 to -0.02) |
| Republic of Moldova | both | 21631.62(20779.61-22591.47) | 24957.11(21688.87-28418.98) | 15.37 | 469.65(452.04-489.52) | 436.35(378.91-496.06) | 0.54(from 0.01 to 1.08) |
| Romania | both | 91439.59(88161.83-94655.43) | 163169.1(133788.89-196692.9) | 78.44 | 324.54(313.35-335.44) | 474.35(387.34-575.79) | 1.07(from 0.87 to 1.28) |
| Russian Federation | both | 724298.5(695937.66-750334.66) | 939797.72(822797.91-1069391.68) | 29.75 | 396.96(380.59-411.51) | 408.98(357.72-465.96) | -0.23(from -0.54 to 0.08) |
| Rwanda | both | 7033.73(4913.18-8986.29) | 13345.9(9964.65-17536.32) | 89.74 | 216.01(153.86-274.32) | 199.2(154.78-253.15) | -0.76(from -1.01 to -0.5) |
| Saint Kitts and Nevis | both | 150.46(137.4-163.78) | 263.01(209.25-314.94) | 74.81 | 417.81(382.96-454.17) | 389.45(318.9-463.11) | -0.31(from -0.48 to -0.14) |
| Saint Lucia | both | 229.59(213.25-247.08) | 558.04(466.71-662.12) | 143.06 | 260.13(241.44-279.5) | 259.51(218.07-307.94) | -0.27(from -0.53 to -0.02) |
| Saint Vincent and the Grenadines | both | 184.68(170.57-200.18) | 421.95(367.48-486.55) | 128.48 | 254.27(234.51-276.27) | 313.82(274.08-360.89) | 0.58(from 0.4 to 0.76) |
| Samoa | both | 222.09(179.79-275.73) | 354.96(273.57-445.07) | 59.83 | 242.1(198.85-298.97) | 232.87(183.09-289.11) | -0.2(from -0.24 to -0.16) |
| San Marino | both | 149.16(128.23-173.81) | 255.76(172.08-363.41) | 71.47 | 455.55(391.14-531.33) | 413.51(272.75-603.31) | -0.15(from -0.24 to -0.07) |
| Sao Tome and Principe | both | 137.51(106.73-165.54) | 350.52(245.71-476.03) | 154.9 | 206.93(164.45-247.38) | 315.44(225.4-427.9) | 1.46(from 1.4 to 1.53) |
| Saudi Arabia | both | 10385.02(7063.43-14698.62) | 53803.43(40723.84-69783.9) | 418.09 | 151.74(102.99-211.15) | 223.14(175.67-276.01) | 1.29(from 1.08 to 1.5) |
| Senegal | both | 5760.46(4522.57-6914.29) | 14439.29(11000.2-18602.85) | 150.66 | 167.56(133.25-199.3) | 183.41(144.5-232.68) | 0.46(from 0.27 to 0.65) |
| Serbia | both | 56032.63(46086.02-62853.27) | 84595.85(67489.7-105390.84) | 50.98 | 488.71(400.55-550.21) | 554.79(441.74-693.84) | 0.53(from 0.38 to 0.68) |
| Seychelles | both | 216.67(197.08-237.83) | 624.71(547.76-714.29) | 188.32 | 381.13(346.02-418.45) | 554.22(485.68-629.46) | 0.89(from 0.65 to 1.13) |
| Sierra Leone | both | 2682.91(2099.12-3316.31) | 5779.58(4263.77-7593.06) | 115.42 | 134.41(105.38-165.54) | 148.55(112.36-192.31) | 0.56(from 0.4 to 0.73) |
| Singapore | both | 12629.89(12119.16-13137.29) | 23876.24(21789.76-25813.93) | 89.05 | 543.81(520.96-566.54) | 303.72(276.77-328.45) | -2.32(from -2.43 to -2.21) |
| Slovakia | both | 33243.14(31759.56-34894.86) | 51875.19(40791.38-65885.31) | 56.05 | 558.22(533.57-585.41) | 571.63(449.13-723.92) | 0.01(from -0.15 to 0.18) |
| Slovenia | both | 11469.54(8847.11-14832.05) | 16809.15(13087.89-21737.48) | 46.55 | 471(363.6-610.48) | 408.2(317.46-532.11) | -0.74(from -1.04 to -0.44) |
| Solomon Islands | both | 386.39(235.31-564.92) | 1060.14(646.12-1440.62) | 174.37 | 228.67(144.2-329.08) | 273.03(177.68-361.03) | 0.52(from 0.43 to 0.61) |
| Somalia | both | 3881.62(2617.52-5893) | 9587.23(6070.22-17895.93) | 146.99 | 129.76(89.44-197.3) | 121.22(76.56-226) | -0.05(from -0.13 to 0.03) |
| South Africa | both | 51604.84(45027.05-60331.14) | 111491.44(100297.13-126628.73) | 116.05 | 228.95(197.16-275.4) | 240.53(216.88-273.5) | 0.25(from 0.02 to 0.48) |
| South Sudan | both | 6005.92(3495.5-10022.8) | 9502.21(5890.16-14741.29) | 58.21 | 234.23(138.29-387.18) | 223.38(142.38-340.61) | -0.11(from -0.21 to -0.01) |
| Spain | both | 212515.47(203254.23-220022.25) | 350228.59(320236.7-377643.3) | 64.8 | 402.81(385.8-416.61) | 387.26(355.22-416.37) | -0.15(from -0.2 to -0.1) |
| Sri Lanka | both | 12695.11(11412.57-13979.57) | 34803.13(25537.27-45949.39) | 174.15 | 108.84(98.19-119.77) | 137.06(101.07-179.67) | 1.05(from 0.95 to 1.16) |
| Sudan | both | 12409.31(9220.79-17882.26) | 34670.03(23958.05-50931.21) | 179.39 | 121.33(91.37-179.24) | 164.39(116.89-242.57) | 1.16(from 1.07 to 1.25) |
| Suriname | both | 755.53(674.97-819.14) | 2236.12(1838.74-2689.56) | 195.97 | 278.94(251.04-301.81) | 367.37(302.8-440.13) | 0.99(from 0.76 to 1.22) |
| Sweden | both | 53991.08(51377.46-56128.11) | 63293.37(59047.1-67074.93) | 17.23 | 381.25(365.11-395.48) | 322.73(303.51-341.26) | -0.63(from -0.77 to -0.5) |
| Switzerland | both | 30167.77(28802.1-31393.84) | 40284.97(36399.83-43854.79) | 33.54 | 301.77(289.15-313.46) | 244.77(222.34-265.09) | -1.01(from -1.19 to -0.83) |
| Syrian Arab Republic | both | 8441.22(6496.36-10877) | 17974.2(12946.08-24204.07) | 112.93 | 135.34(104.68-172.59) | 140.02(102.06-185.69) | -0.05(from -0.29 to 0.19) |
| Taiwan (Province of China) | both | 64598.69(62467.37-66623.43) | 225641.97(176873.5-291069.85) | 249.3 | 376(363.48-387.71) | 588.36(461.5-757.84) | 1.59(from 1.39 to 1.79) |
| Tajikistan | both | 8347.8(7641.54-9163.78) | 12797.49(10253.82-15802.47) | 53.3 | 259.07(237.5-283.63) | 227.59(184.51-277.34) | -0.1(from -0.54 to 0.35) |
| Thailand | both | 99518.81(88057.14-111322.6) | 243609.79(178189.9-319798.06) | 144.79 | 251.94(223.35-281.54) | 241.89(177.38-316.62) | -0.8(from -1.14 to -0.47) |
| Timor-Leste | both | 622.23(448.74-865.9) | 2399.52(1611.33-3135.18) | 285.63 | 179.03(132.17-243.29) | 280.81(190.64-365.16) | 1.92(from 1.66 to 2.19) |
| Togo | both | 2170.86(1789.36-2640.11) | 6737.51(4823.44-9014.39) | 210.36 | 156.49(130.97-187.11) | 169.42(124.17-221.36) | 0.21(from 0.17 to 0.26) |
| Tokelau | both | 3.05(2.38-3.85) | 3.25(2.36-4.28) | 6.57 | 231.45(178.97-292.97) | 245.63(178.53-323.8) | 0.23(from 0.19 to 0.27) |
| Tonga | both | 76.54(62.23-90.73) | 120.15(92.58-153.99) | 56.97 | 132.98(108.27-157.31) | 149.3(115.08-190.45) | 0.29(from 0.17 to 0.41) |
| Trinidad and Tobago | both | 2879.36(2725.41-3038.55) | 5802.05(4361.46-7585.74) | 101.5 | 332.37(314.62-350.26) | 315.44(237.52-411.96) | -0.38(from -0.51 to -0.25) |
| Tunisia | both | 8980.13(7293.04-10759.71) | 26505.89(19100.64-36063.5) | 195.16 | 172.74(140.32-205.78) | 208.08(151-280.73) | 0.55(from 0.47 to 0.62) |
| Turkey | both | 124795.63(100142.7-154906.78) | 259024.48(205967.8-318284.42) | 107.56 | 318.96(256.03-391.02) | 289.17(230.39-354.79) | -0.2(from -0.65 to 0.26) |
| Turkmenistan | both | 4628.89(4404.77-4869.08) | 6955.3(5525.96-8710.68) | 50.26 | 205.34(195.63-215.6) | 166.57(134.29-206.92) | -1.03(from -1.57 to -0.48) |
| Tuvalu | both | 17.63(13.79-21.47) | 26.64(19.23-34.94) | 51.14 | 244.15(192.78-295.12) | 254.27(184.44-332.44) | 0.01(from -0.03 to 0.05) |
| Uganda | both | 10768.19(8570.02-12919.02) | 43113.76(32533.5-54450.07) | 300.38 | 154.08(125.39-181.7) | 267.35(208.92-329.33) | 1.84(from 1.59 to 2.09) |
| Ukraine | both | 387420.49(374495.66-400463.46) | 350467.05(300710.78-412416.93) | -9.54 | 549.39(531.06-568.2) | 485.29(416.28-572.27) | -1.3(from -1.67 to -0.93) |
| United Arab Emirates | both | 1812.4(1217.98-2542.37) | 15819.99(10844.52-21392.51) | 772.88 | 362.51(235.62-488.39) | 327.12(223.85-452.27) | -0.44(from -0.81 to -0.07) |
| United Kingdom | both | 444018.93(430459.63-453696.05) | 433584.69(409710.16-451673.76) | -2.35 | 511.85(497.49-522.46) | 365.24(347.77-379.1) | -1.42(from -1.55 to -1.3) |
| United Republic of Tanzania | both | 21454.13(17490.64-26840.69) | 59013.54(45123.1-78208.26) | 175.07 | 181.3(149.37-222.77) | 217.15(170.96-282.18) | 0.7(from 0.61 to 0.8) |
| United States of America | both | 1370038.34(1322423.82-1408753.87) | 1760639.79(1681317.72-1826204.52) | 28.51 | 441.5(427.01-453.39) | 338.87(324.93-350.79) | -1.1(from -1.2 to -0.99) |
| United States Virgin Islands | both | 377.66(319.16-436.53) | 1018.27(831.85-1202.89) | 169.63 | 427.37(361.4-488.69) | 569.1(463.78-678.01) | 1.27(from 1.07 to 1.47) |
| Uruguay | both | 22202.96(21290.51-23022.71) | 27575.2(25660.98-29467.77) | 24.2 | 581.78(557.74-603.49) | 533.35(498.25-568.48) | -0.39(from -0.46 to -0.32) |
| Uzbekistan | both | 25256.57(24051.21-26395.95) | 48682.57(41085.91-57805.78) | 92.75 | 195.96(186.57-204.97) | 219.56(188.34-253.39) | 0.14(from -0.04 to 0.31) |
| Vanuatu | both | 133.99(93.67-181.47) | 417.11(301.07-557.08) | 211.29 | 180.39(130.22-239.88) | 220.31(161.61-289.69) | 0.48(from 0.32 to 0.64) |
| Venezuela (Bolivarian Republic of) | both | 20885.53(20025.23-21808.26) | 77188.51(57827.12-102451.53) | 269.58 | 197.37(188.83-206.64) | 261.08(197.5-344.79) | 0.65(from 0.51 to 0.79) |
| Viet Nam | both | 88472.86(70816.74-108514.02) | 403550.56(306600.98-505644.83) | 356.13 | 212.2(169.95-259.15) | 409.28(316.33-505.58) | 2.67(from 2.51 to 2.83) |
| Yemen | both | 7199.95(4589.3-10899.36) | 23689.92(17133.45-32021.96) | 229.03 | 130.88(84.43-191.18) | 156.04(116.18-211.94) | 0.93(from 0.81 to 1.06) |
| Zambia | both | 7901.07(5844.6-10215.58) | 23331.91(16631.59-30748.37) | 195.3 | 244.91(183.8-313.29) | 296.78(215.94-383.04) | 0.57(from 0.52 to 0.61) |
| Zimbabwe | both | 9504.99(8275.92-10902.61) | 22796.65(17078.4-29259.59) | 139.84 | 218.87(191.51-249.37) | 295.07(224.13-372.24) | 1.18(from 0.92 to 1.43) |
| Afghanistan | female | 8246.99(4051.62-14650.48) | 19414.21(10603.12-29539.77) | 135.41 | 218.61(113.89-378.31) | 230.44(134.28-335.7) | 0.37(from 0.17 to 0.57) |
| Albania | female | 1971.61(1786.81-2152.73) | 3696.67(2752.27-4833.16) | 87.5 | 169.12(153.8-184.69) | 175.1(130.11-229.27) | 0.48(from 0.26 to 0.69) |
| Algeria | female | 10278.14(8250.1-12715.01) | 28245.37(21477.36-36801.6) | 174.81 | 157.74(128.23-192.82) | 165.14(126.99-211.52) | 0.22(from 0.18 to 0.26) |
| American Samoa | female | 35.12(27.88-42.49) | 74.53(60.2-92.54) | 112.23 | 296.1(234.5-358.39) | 298.96(242.6-370.55) | 0.08(from -0.1 to 0.26) |
| Andorra | female | 71.85(53.38-102.88) | 163.91(118.11-219.48) | 128.14 | 271.18(201.48-384.7) | 233.69(166.63-315.42) | -0.54(from -0.68 to -0.4) |
| Angola | female | 3541.44(2163.54-5936.02) | 12534.91(8822.54-17195.61) | 253.95 | 156.86(97.12-253.22) | 181.63(136.35-240.19) | 0.61(from 0.48 to 0.74) |
| Antigua and Barbuda | female | 71.79(63.7-80.4) | 193.25(162.46-228.54) | 169.2 | 241.01(214.05-269.92) | 360.69(304.83-424.87) | 1.16(from 1.02 to 1.31) |
| Argentina | female | 64698.17(61520.88-67687.1) | 116551.2(107206.21-126187.02) | 80.15 | 364.34(346.46-380.84) | 396.91(365.33-428.95) | 0.22(from 0.11 to 0.32) |
| Armenia | female | 5474.59(5082.27-5914.44) | 6911.34(5747.68-8226.09) | 26.24 | 340.19(317.09-367.54) | 297.52(247.32-354.06) | -0.51(from -0.59 to -0.42) |
| Australia | female | 45508.78(43336.93-47298.45) | 57853.02(51743.88-62857.55) | 27.12 | 440.3(421.01-457.6) | 277.99(250.16-301.69) | -1.91(from -2.05 to -1.76) |
| Austria | female | 31527.72(29937.98-32974.5) | 19101(17096.56-20970.15) | -39.42 | 453.39(432.7-474.27) | 202.4(183.33-221.12) | -3.12(from -3.26 to -2.97) |
| Azerbaijan | female | 7678.11(6951.33-8502.21) | 13574.6(10432.49-17671.77) | 76.8 | 249.29(225.71-275.93) | 248.32(191.72-318.59) | 0.45(from 0 to 0.91) |
| Bahamas | female | 301.55(270.93-333.68) | 724.86(579.23-898.91) | 140.37 | 330.41(296.92-365.33) | 334.12(267.25-413.07) | 0.3(from 0.19 to 0.41) |
| Bahrain | female | 227.22(188.34-272.1) | 865.4(664.47-1110.96) | 280.86 | 237.87(197.1-284.37) | 201.95(157.53-253.5) | -0.66(from -0.93 to -0.4) |
| Bangladesh | female | 23695.54(16496.9-32198.18) | 68371.28(44552.69-101265.7) | 188.54 | 98.78(67.21-134.21) | 104.22(68.07-153.91) | 0.2(from 0.1 to 0.3) |
| Barbados | female | 553.12(504.29-601.74) | 1207.03(979.03-1449.56) | 118.22 | 343.47(315.26-372.1) | 458.9(371.05-552.43) | 1.37(from 1.14 to 1.61) |
| Belarus | female | 29798.37(28228.69-31438.26) | 28693.32(22578.77-36483.71) | -3.71 | 382.28(362.42-402.37) | 306.57(239.96-393.54) | -1.61(from -1.93 to -1.28) |
| Belgium | female | 37431.36(34938.56-39392.19) | 32459.9(28986.03-35662.35) | -13.28 | 430.2(405.66-451.21) | 267.76(242.66-292.72) | -1.78(from -1.88 to -1.69) |
| Belize | female | 75.21(67.3-83.44) | 302.43(256.12-351.54) | 302.12 | 158.21(141.62-175.88) | 206.79(175.88-239.7) | 0.96(from 0.59 to 1.34) |
| Benin | female | 1257.85(1026.96-1514.24) | 3937.6(2976.66-5215.42) | 213.04 | 114.12(92.51-137.68) | 140.56(109.29-182.66) | 0.85(from 0.8 to 0.89) |
| Bermuda | female | 165.83(148.27-185.14) | 196.94(158.85-248.59) | 18.76 | 470.9(421.28-525.02) | 277.84(225.51-350.52) | -2.25(from -2.44 to -2.06) |
| Bhutan | female | 154.91(88.56-245.84) | 419.05(254.7-617.61) | 170.51 | 112.01(64.03-174.25) | 149.52(92.75-217.41) | 0.83(from 0.76 to 0.91) |
| Bolivia (Plurinational State of) | female | 3866.66(2583.85-5177.97) | 12763.58(8535.92-17402.81) | 230.09 | 213.37(144.28-285.08) | 272.66(182.33-371.92) | 0.74(from 0.69 to 0.79) |
| Bosnia and Herzegovina | female | 7090.91(6538.52-7670.15) | 11493.7(8935.2-14498.92) | 62.09 | 304.09(281.35-328.63) | 364.37(283.5-460.21) | 0.74(from 0.59 to 0.9) |
| Botswana | female | 645.47(448.89-907.55) | 2337.15(1511.84-3419.55) | 262.09 | 195.75(138.61-272.9) | 285(189.67-410.4) | 1.41(from 1.26 to 1.55) |
| Brazil | female | 112280.65(108035.68-116373.12) | 313387.73(291399.09-332647.36) | 179.11 | 223.44(213.44-232.01) | 240.76(223.9-255.5) | 0.35(from 0.17 to 0.52) |
| Brunei Darussalam | female | 303.16(248.62-374.47) | 853.63(717.2-1010.35) | 181.58 | 532.75(443.43-643.2) | 508.3(435-590.03) | 0.31(from 0.1 to 0.53) |
| Bulgaria | female | 26183.6(24398.19-27958.29) | 32189.71(25537.86-40335.86) | 22.94 | 403.14(375.33-431.03) | 435.85(339.79-549.91) | 1.32(from 0.88 to 1.77) |
| Burkina Faso | female | 2607.29(1913.3-3474.22) | 7456.3(5563.79-9712.68) | 185.98 | 108.16(79.44-142.45) | 138.12(105.21-177.77) | 0.87(from 0.72 to 1.03) |
| Burundi | female | 2396.57(1544.17-3465.3) | 3848.96(2650.88-5312.39) | 60.6 | 168.38(110.2-242.72) | 150.65(105.75-208.67) | -0.6(from -0.71 to -0.5) |
[truncated: 127,522 more chars]
